# Supplementary material for: A novel protocol for the facile construction of tetrahydroquinoline fused tricyclic frameworks via an intramolecular 1,3-dipolar nitrile oxide cycloaddition reaction
Source: Royal Society of Chemistry journal article supplement (doi:10.1039/c5ob01060h), 2015-01-01

## Supporting Information

# A novel protocol for the facile construction of tetrahydro quinoline fused tricyclic frame works via an intramolecular 1, 3 - dipolar nitrile oxide cycloaddition reaction

Manickam Bakthadoss,<sup>\*(a,b)</sup> and Varathan Vinayagam<sup>(b)</sup>

<sup>a</sup>Department of Chemistry, Pondicherry University, Pondicherry-605 014, India

<sup>b</sup>Department of Organic Chemistry, University of Madras, Guindy Campus, Chennai-600 025, Tamilnadu, India

e-mail : bhakthadoss@yahoo.com

| Contents                                                                                                                            | page   |
|-------------------------------------------------------------------------------------------------------------------------------------|--------|
| (i) Experimental Section                                                                                                            | 2-13   |
| (ii) <sup>1</sup> H, <sup>13</sup> C NMR and Mass Spectra for compounds ( <b>3a-n</b> , <b>5a-n</b> , <b>7a-i</b> and <b>9a-i</b> ) | 14-128 |

## EXPERIMENTAL SECTION

### Typical experimental procedure for the synthesis of compound (3a):

A solution of N-(2-formylphenyl)-4-methylbenzene-1-sulfonamide (**1**) (1 mmol, 0.28 g) and potassium carbonate (2 mmol, 0.28 g) in acetonitrile solvent was stirred for 15 minutes at room temperature. To this solution, (Z)-methyl 2-(bromomethyl)-3-phenylacrylate (**2a**) (1.2 mmol, 0.31 g) was added drop wise till the addition is complete. After the completion of the reaction as indicated by TLC, the reaction mixture was concentrated and extracted with ethylacetate (2x15 mL). The organic layer thus obtained was washed with water (2x10 mL), followed by brine solution (2x 10 mL) and dried over anhydrous sodium sulphate. The crude product obtained was purified by a pad of silica gel (100-200 mesh) column chromatography using ethylacetate and Hexane (1:9) to afford the compound (**3a**) as a colourless solid (0.44 g, 98% yield).

### Methyl (2E)-2-[[N-(2-formylphenyl)(4-methylbenzene) sulfo namido]methyl]-3-phenylprop-2-enoate (3a):

Colourless solid; Yield: 98% mp: 98-100 °C; <sup>1</sup>H NMR (CDCl<sub>3</sub>, 300 MHz) : δ 2.43 (s, 3H), 3.68 (s, 3H), 4.53 (d, 1H, J = 13.5 Hz), 5.06 (d, 1H, J = 13.5 Hz), 6.42 - 7.91 (m, 14H), 9.89 (s, 1H); <sup>13</sup>C NMR (CDCl<sub>3</sub>, 75 MHz): δ 21.6, 46.4, 52.3, 126.3, 127.6, 127.9, 128.3, 128.3, 128.7, 129.5, 129.5, 129.63, 132.9, 133.4, 133.9, 136.1, 141.4, 144.3, 167.5, 189.9; MS (m/z): 451 (M<sup>+</sup>+1).

### Methyl (2E)-2-[[N-(2-formylphenyl)(2-methylbenzene) sulfo namido]methyl]-3-(4-methylphenyl)prop-2-enoate (3b):

Colourless solid; Yield: 87%; mp: 100-102°C; <sup>1</sup>H NMR (CDCl<sub>3</sub>, 300 MHz) : δ 1.96 (s, 3H), 2.39 (s, 3H), 3.76 (s, 3H), 4.35 (d, 1H, J = 13.8Hz), 4.91 (d, 1H, J = 13.5 Hz), 6.25-7.94 (m, 13H), 10.01 (s, 1H); <sup>13</sup>C NMR (CDCl<sub>3</sub>, 75 MHz): δ 19.6, 21.6, 46.8, 52.3, 125.6, 127, 127.6, 127.8, 128.1, 128.2, 128.9, 129.1, 129.5, 130.2, 132.9, 133.5, 133.6, 135.9, 137.5, 142.2, 143.6, 144.2, 167.1, 190.1; MS (m/z): 465 (M<sup>+</sup>+1).

### Methyl (2E)-2-[[N-(2-formylphenyl)(4-methylbenzene) sulfo namido]methyl]-3-(4-methylphenyl)prop-2-enoate (3c):

Colourless solid; Yield: 87%; mp: 103-105 °C; <sup>1</sup>H NMR (CDCl<sub>3</sub>, 300 MHz): δ 2.42 (s, 3H), 2.44 (s, 3H), 3.64 (s, 3H), 4.57 (d, 1H, J = 13.5 Hz), 5.08 (d, 1H, J = 13.5 Hz), 6.48-7.90 (m, 13H), 9.87 (s, 1H); <sup>13</sup>C NMR (CDCl<sub>3</sub>, 75 MHz): δ 21.5, 21.6, 46.4, 52.2, 124.9,

127.7, 127.9, 128.3, 128.7, 129.5, 129.5, 129.9, 131.1, 132.9, 133.3, 136.2, 140.2, 141.2, 144.3, 144.6, 167.7, 189.9; MS (m/z): 465 ( $M^+ + 1$ ).

**Methyl (2E)-2-[[N-(2-formylphenyl)(4-methylbenzene)sulfo namido]methyl]-3-(2-methoxy phenyl)prop-2-enoate (3d):**

Colourless solid; Yield: 97%; mp: 110-112 °C;  $^1\text{H}$  NMR ( $\text{CDCl}_3$ , 300 MHz):  $\delta$  2.41 (s, 3H), 3.69 (s, 3H), 3.70 (s, 3H), 4.45 (d, 1H, J = 13.5 Hz), 5.01 (d, 1H, J = 13.8 Hz), 6.38 - 7.87 (m, 13H), 9.85 (s, 1H);  $^{13}\text{C}$  NMR ( $\text{CDCl}_3$ , 75 MHz):  $\delta$  21.6, 46.7, 52.2, 55.3, 110.7, 120.3, 123.1, 126.3, 127.5, 127.8, 128, 128.3, 129.5, 130, 130.9, 133.3 (m/z): 481 ( $M^+ + 1$ ).

**Methyl (2E)-2-[[N-(2-formylphenyl)(4-methylbenzene)sulfo namido]methyl]-3-(4-methoxyphenyl)prop-2-enoat (3e):**

Colourless solid; Yield : 97%; mp: 110-112 °C;  $^1\text{H}$  NMR ( $\text{CDCl}_3$ , 300 MHz):  $\delta$  2.40 (s, 3H), 3.68 (s, 6H), 4.40 (d, 1H, J = 13.5 Hz), 5.01 (d, 1H, J = 13.8 Hz), 6.37 - 7.89 (m, 13H), 9.85 (s, 1H);  $^{13}\text{C}$  NMR ( $\text{CDCl}_3$ , 75 MHz):  $\delta$  21.6, 46.7, 52.2, 55.3, 110.7, 120.3, 123.1, 126.4, 127.4, 127.7, 128., 128.2, 129.5, 129.9, 130.9, 133.2, 133.3, 136.1, 140.9, 141.5, 144.1, 157.4, 167.4, 190; MS (m/z): 481 ( $M^+ + 1$ ).

**Methyl (2E)-2-[[N-(2-formylphenyl)(4-methylbenzene)sulfo namido]methyl]-3-(2-chlorophenyl)prop-2-enoate (3f):**

Colourless solid; Yield : 90%; mp: 142-144 °C;  $^1\text{H}$  NMR ( $\text{CDCl}_3$ , 300 MHz):  $\delta$  2.43 (s, 3H), 3.65 (s, 3H), 4.49 (d, 1H, J = 13.5 Hz), 5.01 (d, 1H, J = 13.8 Hz), 6.44-7.91 (m, 13H), 9.98 (s, 1H);  $^{13}\text{C}$  NMR ( $\text{CDCl}_3$ , 75 MHz) :  $\delta$  21.6, 46.5, 52.4, 117.7, 123, 127.3, 128, 128.3, 128.5, 128.9, 129.6, 129.8, 130.9, 132.4, 133.5, 135.6, 136.1, 136.2, 141.3, 142.9, 144.5, 167.2, 189.8; MS(m/z): 485 ( $M^+ + 1$ ).

**Methyl (2E)-2-[[N-(2-formylphenyl)(4-methylbenzene)sulfo namido]methyl]-3-(3-chlorophenyl)prop-2-enoate (3g):**

Colourless solid; Yield: 90% ;mp: 142-144 °C;  $^1\text{H}$  NMR ( $\text{CDCl}_3$ , 300 MHz):  $\delta$  2.43 (s, 3H), 3.65 (s, 3H), 4.49 (d, 1H, J = 13.5 Hz), 5.00 (d, 1H, J = 13.5 Hz), 6.44-7.91 (m, 13H), 9.97 (s, 1H);  $^{13}\text{C}$  NMR ( $\text{CDCl}_3$ , 75 MHz):  $\delta$  21.6, 46.4, 52.3, 126.9, 127.7, 128, 128.3, 128.5, 128.9, 129.6, 130.9, 132.4, 132.9, 133.50, 135.61, 136.07, 141.32, 142.87, 144.52, 167.22, 189.76; MS (m/z): 485 ( $M^+ + 1$ ).

**Methyl (2E)-2-[[N-(2-formylphenyl)(4-methylbenzene)sulfo namido]methyl]-3-(4-chlorophenyl)prop-2-enoate (3h):**

Colourless solid; Yield : 79%; mp:145-147°C; <sup>1</sup>H NMR (CDCl<sub>3</sub>, 300 MHz): δ 2.43 (s, 3H), 3.64 (s, 3H), 4.49 (d, 1H, J = 13.2 Hz), 5.00 (d, 1H, J = 12.9 Hz), 6.44-7.90 (m, 13H), 9.98 (s, 1H); <sup>13</sup>C NMR (CDCl<sub>3</sub>, 75 MHz): δ 21.6, 46.5, 52.3, 126.9, 127.7, 128, 128.3, 128.5, 128.9, 129.6, 130.9, 132.4, 132.9, 133.5, 135.6, 136.1, 141.3, 142.9, 144.5, 167.2, 189.8; MS (m/z): 485 (M<sup>+</sup>+1).

**(E)-methyl 3-(2,4-dichlorophenyl)-2-((N-(2-formylphenyl)-4-methylphenylsulfonamido)methyl)acrylate (3i):**

Colourless solid; Yield : 80%, mp: 98-100°C; <sup>1</sup>H NMR (CDCl<sub>3</sub>, 300 MHz) : δ 2.48 (s, 3H), 3.72 (s, 3H), 4.34 (d, 1H, J = 13.5Hz), 4.89 (d, 1H, J = 13.8Hz), 6.36-7.95 (m, 12H), 10.02 (s, 1H); <sup>13</sup>C NMR (CDCl<sub>3</sub>, 75 MHz) :δ 21.6, 46.8, 52.5, 117.7, 122.9, 127, 127.3, 128.1, 128.3, 128.6, 129.6, 129.8, 130.1, 131.1, 133.7, 134.9, 135.8, 136.1, 139.7, 141.4, 144.2, 189.7, 195; MS (m/z): 516 (M<sup>+</sup>+1).

**(E)-methyl 2-((N-(2-formylphenyl)-4-methylphenylsulfo namido)methyl)-3-(4-isopropylphenyl)acrylate (3j):**

Colourless solid; Yield: 88%; mp: 101-103 °C; <sup>1</sup>H NMR (CDCl<sub>3</sub>, 300 MHz.): δ 1.29 (s, 3H), 1.31 (s, 3H), 2.43 (s, 3H), 2.96 (sep, 1H, J = 6.9 Hz), 3.62 (s, 3H), 4.58 (d, 1H, J = 13.2 Hz), 5.06 (d, 1H, J = 13.5 Hz), 6.49 - 7.88 (m, 13H), 9.85 (s, 1H); <sup>13</sup>C NMR (CDCl<sub>3</sub>, 75 MHz): δ 21.6, 23.8, 23.9, 34.1, 46.5, 52.2, 124.9, 126.9, 127.8, 127.9, 128.3, 128.4, 129.5, 130.1, 131.4, 132.9, 133.3, 136.2, 141, 144.3, 144.6, 151.1, 167.8, 189.8; MS (m/z) : 492 (M<sup>+</sup>+1).

**Methyl (2E)-2-[[N-(2-formylphenyl)(4-methylbenzene)sulfo namido]methyl]-3-(4-fluorophenyl)prop-2-enoate (3k):**

Colourless solid; Yield: 79%; mp:132-134°C; <sup>1</sup>H NMR (CDCl<sub>3</sub>, 300 MHz): δ 2.43 (s, 3H), 3.63 (s, 3H), 4.53 (d, 1H, J = 13.2 Hz), 5.03 (d, 1H, J = 13.5 Hz), 6.46-7.90 (m, 13H), 9.93 (s, 1H); <sup>13</sup>C NMR (CDCl<sub>3</sub>, 75 MHz): δ 20.5, 45.2, 51.2, 114.7, 114.9, 124.8, 126.5, 126.9, 127.2, 127.3, 128.5, 128.9, 128.9, 130.7, 130.8, 131.8, 132.3, 135, 140.1, 142, 143.4, 160.5, 166.7, 188.6; MS (m/z): 469 (M<sup>+</sup>+1).

**Methyl (2E)-2-[[N-(2-formylphenyl)(4-methylbenzene)sulfo namido]methyl]-3-(naphthalen-1-yl)prop-2-enoate (3l):**

Colourless solid; Yield: 97%; mp:139-141°C; <sup>1</sup>H NMR (CDCl<sub>3</sub>, 300 MHz): δ 2.36 (s, 3H), 3.85 (s, 3H), 4.43 (d, 1H, J = 13.5 Hz), 5.00 (d, 1H, J = 13.8 Hz), 6.03 - 8.22 (m, 15H), 10.08 (s, 1H); <sup>13</sup>C NMR (CDCl<sub>3</sub>, 75 MHz): δ 21.5, 46.9, 52.5, 124.6, 124.9, 126.4, 126.6, 126.7, 127.3, 127.9, 128, 128, 128.3, 129, 129.4, 131.3, 131.4, 133.2, 133.4, 135.8, 141.4, 142.9, 144, 166.9, 189.9; MS (m/z): 501 (M<sup>+</sup>+1).

**Methyl (2E)-2-[[N-(2-formylphenyl)(4-methylbenzene)sulfo namido]methyl]-3-(3,4-dimethoxyphenyl)prop-2-enoate (3m):**

Colourless solid; Yield:92%; mp:123-125°C; <sup>1</sup>H NMR (CDCl<sub>3</sub>, 300 MHz): δ 2.45 (s, 3H), 3.59 (s, 3H), 3.95 (s, 3H), 3.96(s, 3H), 4.67 (d, 1H, J = 13.2 Hz), 5.13 (d, 1H, J = 13.2 Hz), 6.51-7.89 (m, 12H), 9.89 (s, 1H); <sup>13</sup>C NMR (CDCl<sub>3</sub>, 75MHz): δ 21.6, 46.2, 52.2, 56.1, 56.3, 111.1, 112.9, 122.7, 124.6, 126.5, 127.91, 128.4, 128.4, 128.6, 129.6, 133.1, 133.3, 136.4, 140.76, 141.8, 144.4, 144.8, 150.9, 168.1, 189.8; MS (m/z) : 511 (M<sup>+</sup>+1).

**Methyl (2E)-2-[[N-(2-formylphenyl)(4-methylbenzene)sulfo namido]methyl]-3-(4-methylphenyl)prop-2-enoate (3n):**

Colourless solid; Yield:87%; mp:110-112 °C; <sup>1</sup>H NMR (CDCl<sub>3</sub>, 300 MHz) : δ 1.29 (t, 3H, J = 7.5 Hz), 2.46 (s, 3H), 2.71 (q, 2H, J = 7.5 Hz), 3.60 (s, 3H), 4.46 (d, 1H, J = 12.9 Hz), 4.97 (d, 1H, J = 12.9 Hz), 6.25-7.52 (m, 13H), 9.89 (s, 1H); <sup>13</sup>C NMR (CDCl<sub>3</sub>, 75 MHz) : δ 15.4, 21.6, 28.8, 47.2, 52.1, 125.5, 127.55, 127.8, 128.2, 128.5, 128.9, 129.5, 130, 130.8, 131.4, 133.6, 136.5, 142.7, 144.1, 144.2, 146.1, 168.1, 189.5; MS (m/z) 465 (M<sup>+</sup>+1).

**Representative procedure for the synthesis of Methyl 3-phenyl-5-tosyl-3,3a,4,5-tetrahydro isoxazolo[4,3-c]quinoline-3a-carboxylate (5a):**

To a solution of 2 mmol of *N*-allylated derivative (**3a**) in ethanol, NH<sub>2</sub>OH.HCl (6 mmol) was added and stirred well at room temperature for 1 h. After the completion of the reaction as evidenced by the tlc, ethanol was removed under reduced pressure and the crude thus obtained was further treated with 10 mL CCl<sub>4</sub> and NCS (5 mmol) and Et<sub>3</sub>N (4 mmol) and the reaction mixture and stirred well at room temperature for 1 h. After completion of the reaction, reaction mixture was evaporated under reduced pressure and the resulting crude mass was diluted with water (15 mL) and extracted with ethyl acetate (3 × 15 mL). The combined organic layer was washed with brine (2 × 10 mL) and dried over anhydrous Na<sub>2</sub>SO<sub>4</sub>. The organic layer was evaporated and the crude mass was purified by column chromatography (silica gel 60-120 mesh 5% EtOAc in hexanes) to provide the desired pure product **5a** (0.36 g, 79% yield).

**Methyl 3-phenyl-5-tosyl-3,3a,4,5-tetrahydroisoxazolo[4,3-c]quinoline-3a-carboxylate (5a):**

Colourless solid; mp 163 – 165 °C; <sup>1</sup>H NMR (300 MHz, CDCl<sub>3</sub>): δ 2.38 (s, 3H), 2.66 (d, 1H, J = 12.9 Hz), 3.80 (s, 3H), 4.74 (d, 1H, J = 12.9 Hz), 6.11 (s, 1H), 7.10 – 8.10 (m, 13H); <sup>13</sup>C NMR (75 MHz, CDCl<sub>3</sub>): δ 21.5, 50.1, 53.6, 62.6, 88.2, 117.0, 119.8, 124.0,

125.4, 126.3, 126.7, 128.9, 129.0, 129.9, 131.1, 135.0, 136.6, 137.5, 144.2, 150.6, 170.6; IR (neat) :  $\nu$  1240, 1361, 1600 (medium), 1736 (strong)  $\text{cm}^{-1}$  ; HRMS (m/z) Calcd for  $\text{C}_{25}\text{H}_{22}\text{N}_2\text{O}_5\text{S}$  [M + H]<sup>+</sup> 463.1249, Found 463.1308.

**Methyl 3-o-tolyl-5-tosyl-3,3a,4,5-tetrahydroisoxazolo[4,3-c]quinoline-3a-carboxylate (5b):**

Colourless solid; Yield: 72%; mp 168 – 170°C ; <sup>1</sup>H NMR (300 MHz,  $\text{CDCl}_3$ ):  $\delta$  2.35 (s, 3H), 2.50(s, 3H), 2.77 (d, 1H, J = 12.9 Hz), 3.86 (s, 3H), 4.75 (d, 1H, J = 12.9 Hz) 6.30 (s, 1H), 7.11 – 8.10 (m, 12H); <sup>13</sup>C NMR (75 MHz,  $\text{CDCl}_3$ ):  $\delta$  18.4, 20.6, 23.7, 48.6, 52.7, 61.7, 115.7, 116.0, 118.5, 119.3, 123.0, 124.6, 125.6, 127.5, 128.0, 128.9, 130.0, 130.1, 133.2, 135.7, 136.5, 143.2, 149.4, 169.8; IR (neat):  $\nu$  1252, 1458, 1598 (medium), 1735 (strong)  $\text{cm}^{-1}$  ; HRMS (m/z) Calcd for  $\text{C}_{26}\text{H}_{24}\text{N}_2\text{O}_5\text{S}$  [M + H]<sup>+</sup> 477.1342, Found 477.1474.

**Methyl 3-p-tolyl-5-tosyl-3,3a,4,5-tetrahydroisoxazolo[4,3-c] quinoline-3a-carboxylate (5c):**

Colourless solid; Yield: 76%; mp 170-172 °C; <sup>1</sup>H NMR (300 MHz,  $\text{CDCl}_3$ ):  $\delta$  2.26 (s, 3H), 2.31(s, 3H), 2.63 (d, 1H, J = 12.9 Hz), 3.70 (s, 3H), 4.66 (d, 1H, J = 12.9.1 Hz), 5.99 (s, 1H), 7.01 – 8.01 (m, 12H); <sup>13</sup>C NMR (75 MHz  $\text{CDCl}_3$ ):  $\delta$  21.1, 21.5, 50.1, 53.6, 62.5, 88.2, 117.0, 119.8, 124.0, 125.3, 126.8, 126.8, 129.7,129.9, 131.1, 132.0, 136.6, 137.6, 138.8, 144.2, 150.6, 170.7; IR (neat):  $\nu$  1244, 1464, 1636 (medium), 1740 (strong)  $\text{cm}^{-1}$  ; HRMS (m/z) Calcd for  $\text{C}_{26}\text{H}_{24}\text{N}_2\text{O}_5\text{S}$  [M + H]<sup>+</sup> 477.1362, Found 477.1478.

**Methyl 3-(2-methoxyphenyl)-5-tosyl-3,3a,4,5-tetrahydro isoxazolo[4,3-c]quinoline-3a-carboxylate (5d):** Colourless solid; Yield: 80%; mp 132-134 °C; <sup>1</sup>H NMR (300 MHz,  $\text{CDCl}_3$ ):  $\delta$  2.39 (s, 3H), 2.81 (d, 1H, J = 12.9 Hz), 3.80 (s, 6H), 5.10 (d, 1H, J = 12.9 Hz), 6.51 (s, 1H), 7.09 – 8.05 (m, 12H); <sup>13</sup>C NMR (75 MHz,  $\text{CDCl}_3$ ):  $\delta$  21.5, 48.8, 53.6, 63.0, 85.8, 116.6, 120.0, 124.0, 126.3, 126.8, 127.5, 128.0, 129.9, 130.0, 130.1, 131.3, 131.4, 131.5, 132.9, 136.9, 137.5, 144.2, 150.9, 169.6; IR (neat): $\nu$  1224, 1461, 1622 (medium), 1736 (strong)  $\text{cm}^{-1}$  ; HRMS (m/z) Calcd for  $\text{C}_{26}\text{H}_{24}\text{N}_2\text{O}_6\text{S}$  [M + H]<sup>+</sup> 493.1433, Found; 493.1533.

**Methyl 3-(4-methoxyphenyl)-5-tosyl-3,3a,4,5-tetrahydro isoxazolo[4,3-c]quinoline-3a-carboxylate (5e):** Colourless solid; Yield: 84%; mp 140-142 °C; <sup>1</sup>H NMR (300 MHz,  $\text{CDCl}_3$ ):  $\delta$  2.39 (s, 3H), 2.72 (d, 1H, J = 12.6 Hz), 3.78 (s, 3H), 3.80 (s, 3H), 4.72 (d, 1H, J = 12.9 Hz), 6.06 (s, 1H), 6.88 – 8.09 (m, 12H); <sup>13</sup>C NMR (75 MHz,  $\text{CDCl}_3$ ):  $\delta$  21.5, 50.1, 53.6, 55.3, 62.5, 88.1, 114.4, 117.1, 119.8, 124.0, 126.3, 126.7, 126.8, 127.1, 129.9, 131.2, 136.6, 137.6, 144.2, 150.6, 160.0, 170.7; IR (neat): $\nu$  1287, 1513, 1613 (medium), 1740 (strong)  $\text{cm}^{-1}$  ; HRMS (m/z) Calcd for  $\text{C}_{26}\text{H}_{24}\text{N}_2\text{O}_6\text{S}$  [M + H]<sup>+</sup> 493.1344, Found 493.1433.

**Methyl 3-(2-chlorophenyl)-5-tosyl-3,3a,4,5-tetrahydro isoxazolo[4,3-c]quinoline-3a-carboxylate (5f):** Colourless solid; Yield: 78%; mp 155-157 °C; <sup>1</sup>H NMR (300 MHz, CDCl<sub>3</sub>): δ 2.39 (s, 3H), 2.81 (d, 1H, J = 12.9 Hz), 3.80 (s, 3H), 5.10 (d, 1H, J = 12.9 Hz), 6.51 (s, 1H), 7.09 – 8.08 (m, 12H); <sup>13</sup>C NMR (75 MHz, CDCl<sub>3</sub>): δ 21.5, 48.6, 53.6, 62.9, 85.8, 116.6, 120.0, 124.4, 126.8, 127.5, 128.0, 129.4, 129.9, 130.0, 130.1, 131.3, 131.4, 132.9, 136.9, 137.5, 144.2, 150.7, 169.6; IR (neat): ν 1241, 1461, 1601 (medium), 1736 (strong) cm<sup>-1</sup>; HRMS (m/z) Calcd for C<sub>25</sub>H<sub>21</sub>ClN<sub>2</sub>O<sub>5</sub>S [M + H]<sup>+</sup> 497.0816, Found 497.0932.

**Methyl 3-(3-chlorophenyl)-5-tosyl-3,3a,4,5-tetrahydro isoxazolo[4,3-c]quinoline-3a-carboxylate (5g):** Colourless solid; Yield: 82%; mp 160-162 °C; <sup>1</sup>H NMR (300 MHz, CDCl<sub>3</sub>): δ 2.39 (s, 3H), 2.67 (d, 1H, J = 12.9 Hz), 3.79 (s, 3H), 4.72 (d, 1H, J = 12.9 Hz), 6.09 (s, 1H), 7.10 – 8.08 (m, 12H); <sup>13</sup>C NMR (75 MHz, CDCl<sub>3</sub>): δ 21.5, 50.1, 53.7, 62.6, 87.4, 116.8, 120.0, 124.2, 126.3, 126.7, 126.9, 126.9, 129.2, 129.3, 130.0, 131.3, 133.6, 134.9, 136.6, 137.5, 144.4, 150.7, 170.4; IR (neat): ν 1246, 1479, 1636 (medium), 1732 (strong) cm<sup>-1</sup>; HRMS (m/z) Calcd for C<sub>25</sub>H<sub>21</sub>ClN<sub>2</sub>O<sub>5</sub>S [M + H]<sup>+</sup> 497.0812, Found 497.0930.

**Methyl 3-(4-chlorophenyl)-5-tosyl-3,3a,4,5-tetrahydro isoxazolo[4,3-c]quinoline-3a-carboxylate (5h):** Colourless solid; Yield: 85%; mp 159-161 °C; <sup>1</sup>H NMR (300 MHz, CDCl<sub>3</sub>): δ 2.40 (s, 3H), 2.66 (d, 1H, J = 12.6 Hz), 3.80 (s, 3H), 4.72 (d, 1H, J = 12.9 Hz), 6.09 (s, 1H), 7.11 – 8.08 (m, 12H); <sup>13</sup>C NMR (75 MHz, CDCl<sub>3</sub>): δ 21.5, 50.1, 53.7, 62.6, 87.4, 116.8, 120.0, 124.2, 126.3, 126.7, 126.9, 129.3, 130.0, 131.3, 133.6, 134.9, 136.6, 137.6, 144.3, 150.7, 170.7; IR (neat): ν 1243, 1490, 1616 (medium), 1740 (strong) cm<sup>-1</sup>; HRMS (m/z) Calcd for C<sub>25</sub>H<sub>21</sub>ClN<sub>2</sub>O<sub>5</sub>S [M + H]<sup>+</sup> 497.0924, Found 497.0932.

**Methyl 3-(2,4-dichlorophenyl)-5-tosyl-3,3a,4,5-tetrahydro isoxazolo[4,3-c]quinoline-3a-carboxylate (5i):** Colourless solid; Yield: 79%; mp 157-159 °C; <sup>1</sup>H NMR (300 MHz, CDCl<sub>3</sub>): δ 2.40 (s, 3H), 2.81 (d, 1H, J = 12.9 Hz), 3.80 (s, 3H), 5.06 (d, 1H, J = 12.6 Hz), 6.46 (s, 1H), 7.10 – 8.07 (m, 11H); <sup>13</sup>C NMR (75 MHz, CDCl<sub>3</sub>): δ 21.6, 48.8, 53.7, 63.0, 85.4, 116.5, 120.1, 124.1, 126.3, 126.8, 127.9, 129.1, 129.8, 130.0, 131.5, 131.6, 132.1, 135.4, 137.0, 137.5, 144.3, 151.1, 169.5; IR (neat): ν 1244, 1463, 1636 (medium), 1737 (strong) cm<sup>-1</sup>; HRMS (m/z) Calcd for C<sub>25</sub>H<sub>20</sub>Cl<sub>2</sub>N<sub>2</sub>O<sub>5</sub>S [M + H]<sup>+</sup> 531.0436, Found 531.0549.

**Methyl 3-(4-isopropylphenyl)-5-tosyl-3,3a,4,5-tetrahydro isoxazolo[4,3-c]quinoline-3a-carboxylate (5j):** Colourless solid; Yield: 86%; mp 152-154 °C; <sup>1</sup>H NMR (300 MHz, CDCl<sub>3</sub>): δ 1.16 (d, 6H, J = 6.9 Hz), 2.31 (s, 3H), 2.83 (sep, 1H, J = 6.9 Hz), 2.61 (d, 1H, J

= 12.9 Hz), 3.71 (s, 3H), 4.68 (d, 1H, J = 12.9 Hz), 5.99 (s, 1H), 7.02 – 8.02 (m, 12H). <sup>13</sup>C NMR (75 MHz CDCl<sub>3</sub>): δ 21.5, 23.8, 23.9, 33.8, 50.1, 53.6, 62.5, 88.3, 117.0, 119.7, 124.0, 125.4, 126.3, 126.8, 127.0, 129.9, 131.1, 132.3, 136.6, 137.4, 144.2, 149.7, 150.63, 170.7; IR (neat): ν 1260, 1461, 1606 (medium), 1742 (strong) cm<sup>-1</sup>; HRMS (m/z) Calcd for C<sub>28</sub>H<sub>28</sub>N<sub>2</sub>O<sub>5</sub>S [M + H]<sup>+</sup> 505.1674, Found 505.1795.

**Methyl 3-(4-fluorophenyl)-5-tosyl-3,3a,4,5-tetrahydro isoxazolo[4,3-c]quinoline-3a-carboxylate (5k):** Colourless solid; Yield: 81%; mp 139-141 °C; <sup>1</sup>H NMR (300 MHz, CDCl<sub>3</sub>): δ 2.39 (s, 3H), 2.66 (d, 1H, J = 12.6 Hz), 3.79 (s, 3H), 4.72 (d, 1H, J = 12.9 Hz), 6.09 (s, 1H), 7.05 – 8.08 (m, 12H); <sup>13</sup>C NMR (75 MHz, CDCl<sub>3</sub>): δ 21.5, 50.1, 53.7, 62.6, 87.5, 115.9, 116.2, 116.8, 119.9, 124.1, 126.3, 126.7, 127.3, 127.4, 130.0, 130.9, 131.2, 136.6, 137.5, 144.4, 150.7, 170.5; IR (neat): ν 1240, 1508, 1603 (medium), 1746 (strong) cm<sup>-1</sup>; HRMS (m/z) Calcd for C<sub>25</sub>H<sub>21</sub>FN<sub>2</sub>O<sub>5</sub>S [M + H]<sup>+</sup> 481.1124, Found 481.1235.

**Methyl 3-(naphthalen-2-yl)-5-tosyl-3,3a,4,5-tetrahydro isoxazolo[4,3-c]quinoline-3a-carboxylate (5l):** Colourless solid; Yield: 84%; mp 155-157 °C; <sup>1</sup>H NMR (300 MHz, CDCl<sub>3</sub>): δ 2.34 (s, 3H), 2.62 (d, 1H, J = 12.9 Hz), 3.87 (s, 3H), 4.69 (d, 1H, J = 12.9 Hz), 6.96 (s, 1H), 7.11 – 7.93 (m, 15H); <sup>13</sup>C NMR (75 MHz, CDCl<sub>3</sub>): δ 21.4, 50.2, 53.8, 63.3, 86.2, 117.4, 120.2, 122.5, 124.0, 124.2, 125.5, 126.2, 126.0, 126.5, 127.4, 129.0, 129.2, 129.7, 129.8, 130.2, 131.0, 133.6, 136.9, 137.6, 144.1, 150.6, 171.1; IR (neat): ν 1240, 1486, 1600 (medium), 1738 (strong) cm<sup>-1</sup>; HRMS (m/z) Calcd for C<sub>29</sub>H<sub>24</sub>N<sub>2</sub>O<sub>5</sub>S [M + H]<sup>+</sup> 513.1370, Found 513.1488.

**Methyl 3-(3,4-dimethoxyphenyl)-5-tosyl-3,3a,4,5-tetrahydro isoxazolo[4,3-c]quinoline-3a-carboxylate (5m):** Colourless solid; Yield: 79%; mp 156-158 °C; <sup>1</sup>H NMR (300 MHz, CDCl<sub>3</sub>): δ 2.39 (s, 3H), 2.73 (d, 1H, J = 12.9 Hz), 3.79 (s, 3H), 3.87 (d, 6H, J = 4.8 Hz), 4.73 (d, 1H, J = 12.9 Hz), 6.06 (s, 1H), 6.75 – 8.08 (m, 11H); <sup>13</sup>C NMR (75 MHz, CDCl<sub>3</sub>): δ 20.5, 28.6, 49.1, 52.6, 54.9, 55.1, 61.5, 87.1, 107.3, 110.5, 116.0, 116.8, 118.9, 123.0, 125.2, 127.7, 126.5, 129.0, 130.1, 135.6, 136.6, 143.3, 148.4, 149.7, 169.7; IR (neat): ν 1237, 1512, 1623 (medium), 1737 (strong) cm<sup>-1</sup>; HRMS (m/z) Calcd for C<sub>27</sub>H<sub>26</sub>N<sub>2</sub>O<sub>7</sub>S [M + H]<sup>+</sup> 523.1422, Found 523.1534.

**Methyl 3-(4-ethylphenyl)-5-tosyl-3,3a,4,5-tetrahydro isoxazolo[4,3-c]quinoline-3a-carboxylate (5n):** Colourless solid; Yield: 74%; mp 163-165 °C; <sup>1</sup>H NMR (300 MHz, CDCl<sub>3</sub>): δ 1.24 (t, 3H, J = 7.5 Hz), 2.38 (s, 3H), 2.67 (q, 3H, J = 7.5 Hz), 3.78 (s, 3H), 4.75 (d, 1H, J = 12.9 Hz), 6.07 (s, 1H), 7.11 – 8.09 (m, 12H); <sup>13</sup>C NMR (75 MHz, CDCl<sub>3</sub>): δ 15.4, 21.5, 28.5, 50.1, 53.6, 62.5, 88.3, 117.0,



119.8, 122.4, 124.0, 125.4, 126.3, 126.8, 128.5, 129.9, 131.1, 132.2, 136.6, 137.5, 144.2, 145.1, 170.7; IR (KBr):  $\nu$  1245, 1486, 1606 (medium), 1737 (strong)  $\text{cm}^{-1}$ ; HRMS (m/z) Calcd for  $\text{C}_{27}\text{H}_{26}\text{N}_2\text{O}_5\text{S}$   $[\text{M} + \text{H}]^+$  491.1523, Found 491.1639.

**Typical experimental procedure for the synthesis of (Z)-N-(2-cyano-3-phenylallyl)-N-(2-formylphenyl)-4-methylbenzenesulfonamide (7a):** A solution of N-Ts aminobenzaldehyde (**1**) (1 mmol, 0.28g) and potassium carbonate (2 mmol, 0.29 g) in acetonitrile solvent was stirred for 15 min at room temperature. To this solution, (E)-2-(bromomethyl)-3-arylacrylonitrile (**6a**) (1.2 mmol, 0.27 g) was added drop wise till the addition is complete. After the completion of the reaction as indicated by TLC, the reaction mixture was concentrated and extracted with ethylacetate (2x15 mL). The organic layer thus obtained was washed with water (2x10 mL), followed by brine solution (2x 10 mL) and dried over anhydrous sodium sulphate. Then the crude sample was purified by a pad of silica gel (100-200 mesh) column chromatography using ethylacetate and Hexane (1:9) to afford the pure product (**7a**) as a colourless solid (0.38 g, 92% yield).

**(Z)-N-(2-cyano-3-phenylallyl)-N-(2-formylphenyl)-4-methylbenzenesulfonamide (7a):**

Colorless solid; Yield:92%; mp:126-128°C;  $^1\text{H}$  NMR (300 MHz,  $\text{CDCl}_3$ ):  $\delta$  2.44 (s, 3H), 4.27 (d, 1H,  $J = 14.4\text{Hz}$ ), 4.82 (d, 1H,  $J = 13.8\text{Hz}$ ), 6.85–8.03 (m, 14H), 10.46 (s, 1H);  $^{13}\text{C}$  NMR ( $\text{CDCl}_3$ , 75 MHz):  $\delta$  21.7, 55.8, 105.5, 117.5, 128.1, 128.3, 128.9, 129, 129.3, 129.4, 129.9, 131.2, 132.4, 134, 134.3, 135.9, 140.3, 144.8, 147.9, 189,6; MS (m/z):417 ( $\text{M}^+ + 1$ ).

**(2Z)-2-[[N-(2-Formylphenyl)(4-methylbenzene)sulfonamido]methyl]-3-(2-chlorophenyl) prop-2-enitrile (7b):**

Colorless solid; Yield :92%; mp: 134-136°C;  $^1\text{H}$  NMR (300 MHz,  $\text{CDCl}_3$ ) :  $\delta$  2.46 (s, 3H), 4.30 (d, 1H,  $J = 13.1\text{ Hz}$ ), 4.87 (d, 1H,  $J = 13.8\text{ Hz}$ ), 6.86–8.03 (m, 13H), 10.46 (s, 1H);  $^{13}\text{C}$  NMR ( $\text{CDCl}_3$ , 75 MHz) :  $\delta$  21.7, 55.3, 109.1, 116.6, 127.3, 128.1, 129.2, 129.3, 129.5, 129.8, 129.9, 130.8, 131.9, 133.9, 134.2, 134.3, 135.9, 140.1, 144.5, 144.8, 189.5; MS (m/z): 452 ( $\text{M}^+ + 1$ ).

**(2Z)-2-[[N-(2-Formylphenyl)(4-methylbenzene)sulfonamido]methyl]-3-(4-chlorophenyl) prop-2-enitrile (7c):**

Colorless solid; Yield: 92%; mp: 131-133°C; <sup>1</sup>H NMR (300 MHz, CDCl<sub>3</sub>): δ 2.45 (s, 3H), 4.30 (d, 1H, J = 13.1 Hz), 4.87 (d, 1H, J = 13.8 Hz), 6.86–8.03 (m, 13H), 10.42 (s, 1H); <sup>13</sup>C NMR (CDCl<sub>3</sub>, 75 MHz): δ 21.7, 55.8, 106.3, 117.2, 128, 128.4, 129.3, 129.3, 129.5, 129.9, 130.3, 130.8, 133.9, 134.4, 135.8, 137.2, 140.3, 144.9, 146.3, 189.5; MS (m/z) :452 (M<sup>+</sup>+1).

**(2Z)-3-(2H-1,3-Benzodioxol-5-yl)-2-[[N-(2-formylphenyl)(4-methylbenzene)sulfonamido] methyl}prop-2-enenitrile (7d):**

Colorless solid; Yield :92%; mp:136-138°C; <sup>1</sup>H NMR (300 MHz, CDCl<sub>3</sub>) : δ 2.45 (s, 3H), 4.24 (d, 1H, J = 13.5 Hz), 4.77 (d, 1H, J = 13.5 Hz), 5.99 (s, 2H), 6.75-8.00 (m, 12H), 10.40 (s, 1H); <sup>13</sup>C NMR (CDCl<sub>3</sub>, 75 MHz): δ 21.7, 55.9, 101.8, 102.5, 107.8, 108.6, 117.8, 125.9, 126.6, 127.3, 128, 128.4, 129.3, 129.4, 129.8, 134.2, 135.9, 140.3, 144.7, 147.5, 148.3, 150.3, 189.6; MS (m/z) : 462 (M<sup>+</sup>+1).

**(Z)-N-(2-cyano-3-(2,4-dichlorophenyl)allyl)-N-(2-formylphenyl)-4-methylbenzenesulfonamide (7e):**

Colorless solid; Yield:92%; mp:126-132°C; <sup>1</sup>H NMR (300 MHz, CDCl<sub>3</sub>): δ 2.46 (s, 3H), 4.30 (d, 1H, J = 14.4Hz), 4.80 (d, 1H, J = 14.7Hz), 6.87–8.01 (m, 12H), 10.42 (s, 1H); <sup>13</sup>C NMR (CDCl<sub>3</sub>, 75 MHz): δ 21.7, 55.8, 106.2, 117.2, 125.6, 127.4, 128, 128.4, 129.1, 129.3, 129.4, 129.5, 129.7, 129.9, 130.3, 130.8, 130.9, 134.4, 135.8, 137.2, 140.3, 144.9, 146.3, 189.6; MS (m/z): 483 (M<sup>+</sup>+1).

**((Z)-N-(2-cyano-3-(4-isopropylphenyl)allyl)-N-(2-formylphenyl)-4-methylbenzenesulfonamide(7f):**

Colorless solid; Yield: 88%; mp:132-136 °C <sup>1</sup>H NMR (CDCl<sub>3</sub>, 300 MHz.): δ 1.29 (s, 6H), 2.46 (s, 3H), 2.42 (sep, J = 6.3 Hz, 1H), 4.27 (d, 1H, J = 14.1Hz), 4.84 (d, 1H, J = 13.8Hz), 6.86 - 8.01 (m, 13H), 10.45 (s, 1H). <sup>13</sup>C NMR (CDCl<sub>3</sub>, 75 MHz): δ 21.7, 23.7, 23.8, 34.1, 55.8, 103.9, 117.7, 127.1, 128.1, 128.3, 129.3, 129.3, 129.6, 129.8, 129.9, 129.9, 134.1, 134.3, 135.9, 140.3, 144.7, 147.9, 152.7, 189.6; MS (m/z); 457 (M<sup>+</sup>+1).

**(2Z)-2-[[N-(2-Formylphenyl)(4-methylbenzene)sulfonamido]methyl]-3-(2-methylphenyl) prop-2-enenitrile (7g):**

Colorless solid; Yield: 92%; mp:121-123°C; <sup>1</sup>H NMR (300 MHz, CDCl<sub>3</sub>) : δ 2.06 (s, 3H), 2.46 (s, 3H), 4.30 (s, 1H), 4.88 (d, 1H, J = 11.7 Hz), 6.87–8.03 (m, 13H), 10.49 (s, 1H); <sup>13</sup>C NMR (CDCl<sub>3</sub>, 75 MHz) : δ 19.5, 21.7, 55.4, 107.7, 117.1, 126.4, 127.8, 128.1, 129.2, 129.3, 129.9, 130.5, 130.7, 131.8, 133.8, 134.3, 136, 137.1, 140.2, 144.9, 147.3, 189.6; MS (m/z); 432 (M<sup>+</sup>+1).

**(2Z)-2-[[N-(2-formylphenyl)(4-methylbenzene)sulfonamido]methyl]-3-(3-chlorophenyl) prop-2-enenitrile (7h):**

Colorless solid; Yield: 92%; mp: 124-228°C; <sup>1</sup>H NMR (300 MHz, CDCl<sub>3</sub>): δ 2.45 (s, 3H), 4.29 (d, 1H, J = 14.1Hz), 4.81 (d, 1H, J = 14.1Hz), 6.87–8.01 (m, 13H), 10.43 (s, 1H); <sup>13</sup>C NMR (CDCl<sub>3</sub>, 75 MHz): δ 21.7, 55.8, 105.5, 117.5, 127.3, 128.1, 128.4, 128.9, 129, 129.3, 129.5, 129.9, 131.2, 132.3, 134.1, 134.3, 135.8, 140.3, 144.8, 147.9, 189.6; MS (m/z); 452 (M<sup>+</sup>+1).

**(2Z)-2-[[N-(2-Formylphenyl)(4-methylbenzene)sulfonamido]methyl]-3-(3,4-dimethoxyphenyl)prop-2-enenitrile (7i):**

Colorless; solid; Yield: 92%; mp: 139-141°C; <sup>1</sup>H NMR (300 MHz, CDCl<sub>3</sub>): δ 2.45 (s, 3H), 3.86 (s, 3H), 3.88 (s, 3H), 4.23 (d, 1H, J = 14.4 Hz), 4.83 (d, 1H, J = 13.1 Hz), 6.80–8.01 (m, 12H), 10.47 (s, 1H); <sup>13</sup>C NMR (CDCl<sub>3</sub>, 75 MHz) : δ 21.6, 55.9, 55.9, 55.9, 60.9, 101.9, 110.5, 110.8, 118.2, 124.4, 125.3, 128, 128.2, 129.2, 129.8, 129.9, 134.1, 134.3, 135.9, 140.4, 144.7, 147.8, 149, 151.7, 189.7; MS (m/z): 478 (M<sup>+</sup>+1).

**Representative procedure for the synthesis of 3-Phenyl-5-tosyl-3,3a,4,5-tetrahydroisoxazolo[4,3-c]quinoline-3a-carbonitrile (9a):**

To a solution of 2 mmol of N-allylated derivative (**7a**) in ethanol, NH<sub>2</sub>OH.HCl (6 mmol) was added and stirred well at room temperature for 1 h. After the completion of the reaction as evidenced by the tlc, ethanol was removed under reduced pressure and the crude thus obtained was further treated with 10 mL CCl<sub>4</sub> and NCS (5 mmol) and Et<sub>3</sub>N (4 mmol) and the reaction mixture and stirred well at room temperature for 1 h. After completion of the reaction, reaction mixture was evaporated under reduced pressure and the resulting crude mass was diluted with water (15 mL) and extracted with ethyl acetate (3 × 15 mL). The combined organic layer was washed with brine (2 × 10 mL) and dried over anhydrous Na<sub>2</sub>SO<sub>4</sub>. The organic layer was evaporated and the crude mass was purified by column chromatography (silica gel 60-120 mesh 5% EtOAc in hexanes) to provide the desired pure product **9a** (0.29 g, 67% yield).

**3-Phenyl-5-tosyl-3,3a,4,5-tetrahydroisoxazolo[4,3-c]quinoline-3a-carbonitrile(9a):**

Colourless solid; Yield: 67%; mp 136 - 138 °C; <sup>1</sup>H NMR (300 MHz, CDCl<sub>3</sub>): δ 2.38, (s, 3H), 3.90 (d, 1H, J = 12.6 Hz), 5.30 (d, 1H, J = 12.9 Hz), 5.49 (s, 1H), 7.12 – 7.95 (m, 13H); <sup>13</sup>CNMR (75 MHz, CDCl<sub>3</sub>): δ 21.6, 51.0, 54.2, 89.4, 113.8, 114.0, 119.7, 124.5, 126.7, 126.8, 128.8, 129.1, 130.2, 131.5, 132.7, 135.5, 136.7, 145.5, 151.6; IR (KBr): ν1262, 1444, 1603, 2837 (medium) cm<sup>-1</sup> ; HRMS (m/z) Calcd for C<sub>24</sub>H<sub>19</sub>N<sub>3</sub>O<sub>3</sub>S [M + H]<sup>+</sup> 430.1168, Found 430.1203.

**3-(2-Chlorophenyl)-5-tosyl-3,3a,4,5-tetrahydroisoxazolo[4,3-c]quinoline-3a-carbonitrile (9b):**

Colourless solid; Yield: 64%; mp 160-162 °C; <sup>1</sup>H NMR (300 MHz, CDCl<sub>3</sub>): δ 2.32 (s, 3H), 2.76 (d, 1H, J = 13.2 Hz), 5.10 (d, 1H, J = 12.9 Hz), 6.49 (s, 1H), 7.02 – 7.93 (m, 12H); <sup>13</sup>CNMR (75 MHz, CDCl<sub>3</sub>): δ 21.6, 43.7, 48.5, 50.9, 86.3, 113.7, 116.6, 119.4, 124.2, 127.1, 127.8, 128.1, 129.9, 130.9, 131.1, 131.4, 131.1, 132.4, 135.7, 136.5, 145.0, 148.0; IR (KBr): ν 1261, 1523, 1633, 2057 (medium) cm<sup>-1</sup>; HRMS (m/z) Calcd for C<sub>24</sub>H<sub>18</sub>ClN<sub>3</sub>O<sub>3</sub>S [M + H]<sup>+</sup> 464.0767, Found 464.0842.

**3-(4-Chlorophenyl)-5-tosyl-3,3a,4,5-tetrahydroisoxazolo[4,3-c]quinoline-3a-carbonitrile (9c):**

Colourless solid; Yield: 66%; mp 158-160°C; <sup>1</sup>H NMR (300 MHz, CDCl<sub>3</sub>): δ 2.31 (s, 3H), 3.81 (d, 1H, J = 12.9 Hz), 5.21 (d, 1H, J = 12.6 Hz), 5.40 (s, 1H), 7.05 – 7.98 (m, 12H); <sup>13</sup>CNMR (75 MHz, CDCl<sub>3</sub>): δ 20.5, 28.6, 49.9, 53.2, 87.6, 112.6, 112.9, 118.7, 123.6, 125.8, 127.0, 127.2, 128.4, 128.9, 131.8, 134.5, 135.3, 135.7, 144.2, 150.6; IR (KBr): ν 1284, 1491, 1636, 2925 (medium) cm<sup>-1</sup>; HRMS (m/z) Calcd for C<sub>24</sub>H<sub>18</sub>ClN<sub>3</sub>O<sub>3</sub>S [M + H]<sup>+</sup> 464.0756, Found 464.0833.

**3-(Benzo[d][1,3]dioxol-5-yl)-5-tosyl-3,3a,4,5-tetrahydroisoxazolo[4,3-c]quinoline-3a-carbonitrile (9d):** Colourless solid; Yield: 61%; mp 175-177 °C; <sup>1</sup>H NMR (300 MHz, CDCl<sub>3</sub>): δ 2.39 (s, 3H), 3.84 (d, 1H, J = 12.9 Hz), 5.27 (d, 1H, J = 12.9 Hz), 5.40 (s, 1H), 6.05 (s, 2H), 6.90 – 7.96 (m, 11H); <sup>13</sup>CNMR (75 MHz, CDCl<sub>3</sub>): δ 21.6, 51.0, 54.0, 57.2, 89.3, 101.6, 107.2, 108.7, 113.8, 119.7, 121.0, 124.5, 124.8, 126.7, 128.1, 129.9, 132.7, 135.5, 136.7, 145.1, 148.3, 149.2, 151.6; IR (KBr): ν 1024, 1362, 1605, 2830 (medium)cm<sup>-1</sup>; HRMS (m/z) Calcd for C<sub>25</sub>H<sub>19</sub>N<sub>3</sub>O<sub>5</sub>S [M + H]<sup>+</sup> 474.1045, Found 474.1125.

**3-(2,4-dichlorophenyl)-5-tosyl-3,3a,4,5-tetrahydroisoxazolo[4,3-c]quinoline-3a-carbonitrile (9e):** Colourless solid; Yield: 63%; mp 152-154 °C; <sup>1</sup>H NMR (300 MHz, CDCl<sub>3</sub>): δ 2.38 (d, 3H), 3.87 (d, 1H, J = 12.9 Hz), 5.28 (d, 1H, J = 12.9 Hz), 5.46 (s, 1H), 7.11 – 7.96 (m, 11H); <sup>13</sup>CNMR (75 MHz, CDCl<sub>3</sub>): δ 15.3, 21.6, 28.7, 51.0, 54.1, 89.5, 113.9, 114.2, 119.7, 124.5, 126.7, 126.9, 128.0, 128.5, 128.6, 129.9, 132.6, 135.6, 136.7, 145.1, 146.5, 151.6; IR (KBr): ν 1286, 1462, 1604, 2963 (medium) cm<sup>-1</sup>; HRMS (m/z) Calcd for C<sub>24</sub>H<sub>17</sub>Cl<sub>2</sub>N<sub>3</sub>O<sub>3</sub>S [M + H]<sup>+</sup> 498.0346, Found 498.0460.

**3-(4-Isopropylphenyl)-5-tosyl-3,3a,4,5-tetrahydroisoxazolo[4,3-c]quinoline-3a-carbonitrile (9f):** Colourless solid; Yield: 66%; mp 183-185 °C; <sup>1</sup>H NMR (300 MHz, CDCl<sub>3</sub>): δ 1.30 (d, 6H, J = 15.0 Hz), 2.38 (s, 3H), 2.83 (sep, 1H, J = 6.6 Hz), 3.87 (d, 1H, J =

11.7 Hz), 5.26 (d, 1H, J = 9.9 Hz), 5.40 (s, 1H), 7.13 – 7.96 (m, 12H); <sup>13</sup>CNMR (75 MHz, CDCl<sub>3</sub>): δ 21.6, 23.8, 23.9, 34.0, 51.0, 54.0, 89.5, 113.9, 114.2, 119.7, 124.5, 126.7, 127.0, 128.5, 129.9, 132.6, 135.6, 136.7, 145.1, 151.6; IR (KBr): ν 1269, 1463, 1637, 2398 (medium) cm<sup>-1</sup>; HRMS (m/z) Calcd for C<sub>27</sub>H<sub>25</sub>N<sub>3</sub>O<sub>3</sub>S [M + H]<sup>+</sup> 472.1578, Found 472.1694.

**3-o-Tolyl-5-tosyl-3,3a,4,5-tetrahydroisoxazolo[4,3-c]quinoline-3a-carbonitrile (9g):**

Colourless solid; Yield: 65%; mp 190-192 °C; <sup>1</sup>H NMR (300 MHz, CDCl<sub>3</sub>): δ 2.30 (s, 3H), 2.31 (s, 3H), 3.85 (d, 1H, J = 12.6 Hz), 5.28 (d, 1H, J = 12.9 Hz), 5.75 (s, 1H), 7.03 – 7.8 (m, 12H); <sup>13</sup>CMR (75 MHz, CDCl<sub>3</sub>): δ 14.1, 19.7, 21.6, 29.7, 51.1, 54.3, 86.5, 113.8, 119.6, 124.5, 126.7, 127.5, 128.1, 129.7, 130.9, 132.6, 135.4, 135.5, 136.5, 145.1, 151.1; IR (KBr): ν 1287, 1489, 1633, 2852 (medium) cm<sup>-1</sup>; HRMS (m/z) Calcd for C<sub>25</sub>H<sub>21</sub>N<sub>3</sub>O<sub>3</sub>S [M + H]<sup>+</sup> 444.1254, Found 444.1379.

**3-(3-Chlorophenyl)-5-tosyl-3,3a,4,5-tetrahydroisoxazolo[4,3-c]quinoline-3a-carbonitrile (9h):**

Colourless solid; Yield: 67%; mp 155-157 °C; <sup>1</sup>H NMR (300 MHz, CDCl<sub>3</sub>): δ 2.30 (s, 3H), 3.83 (d, 1H, J = 5.1 Hz), 5.23 (d, 1H, J = 5.1 Hz), 5.43 (s, 1H), 7.02 – 7.86 (m, 12H); <sup>13</sup>C NMR (75 MHz, CDCl<sub>3</sub>): δ 21.6, 28.6, 50.0, 53.2, 88.3, 112.8, 118.7, 123.5, 125.8, 127.0, 128.1, 128.8, 128.9, 129.2, 130.6, 130.5, 131.7, 134.5, 135.7, 144.1, 150.6; IR (KBr): ν 1260, 1521, 1635, 2923 (medium) cm<sup>-1</sup>; HRMS (m/z) Calcd for C<sub>24</sub>H<sub>18</sub>ClN<sub>3</sub>O<sub>3</sub>S [M + H]<sup>+</sup> 464.0746, Found 464.0829.

**3-(3,4-Dimethoxyphenyl)-5-tosyl-3,3a,4,5-tetrahydroisoxazolo[4,3-c]quinoline-3a-carbonitrile (9i):** Colourless solid; Yield: 62%; mp 180-182 °C; <sup>1</sup>H NMR (300 MHz, CDCl<sub>3</sub>): δ 2.33 (s, 3H), 3.94 (d, 1H, J = 21.6 Hz), 3.95 (s, 6H), 5.54 (d, 1H, J = 13.2 Hz), 5.95 (s, 1H), 7.10 – 7.97 (m, 11H); <sup>13</sup>CNMR (75 MHz, CDCl<sub>3</sub>): δ 21.5, 51.4, 54.5, 56.3, 88.2, 111.5, 112.9, 113.7, 114.1, 115.4, 119.8, 122.9, 124.5, 126.6, 128.0, 129.9, 132.7, 135.8, 136.8, 145.0, 148.9, 150.8, 151.6; IR (KBr): ν 1268, 1461, 1637, 2925 (medium) cm<sup>-1</sup>; HRMS (m/z) Calcd for C<sub>26</sub>H<sub>23</sub>N<sub>3</sub>O<sub>5</sub>S [M + H]<sup>+</sup> 490.1324, Found 490.1431.

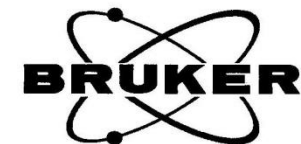

Current Data Parameters  
NAME DK-V-N-Ts-H-EST  
EXPNO 1  
PROCNO 1

F2 - Acquisition Parameters  
Date\_ 20110910  
Time\_ 16.12  
INSTRUM spect  
PROBHD 5 mm DUL 13C-1  
PULPROG zg30  
TD 65536  
SOLVENT CDC13  
NS 16  
DS 2  
SWH 6172.839 Hz  
FIDRES 0.094190 Hz  
AQ 5.3084660 sec  
RG 64  
DW 81.000 usec  
DE 6.00 usec  
TE 300.0 K  
D1 1.00000000 sec  
TD0 1

===== CHANNEL f1 =====  
NUC1 1H  
P1 13.15 usec  
PL1 0.00 dB  
SFO1 300.1318534 MHz

F2 - Processing parameters  
SI 32768  
SF 300.1300000 MHz  
WDW EM  
SSB 0  
LB 0.30 Hz  
GB 0  
PC 1.00

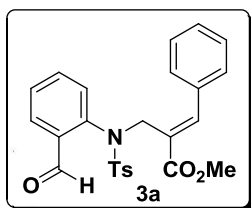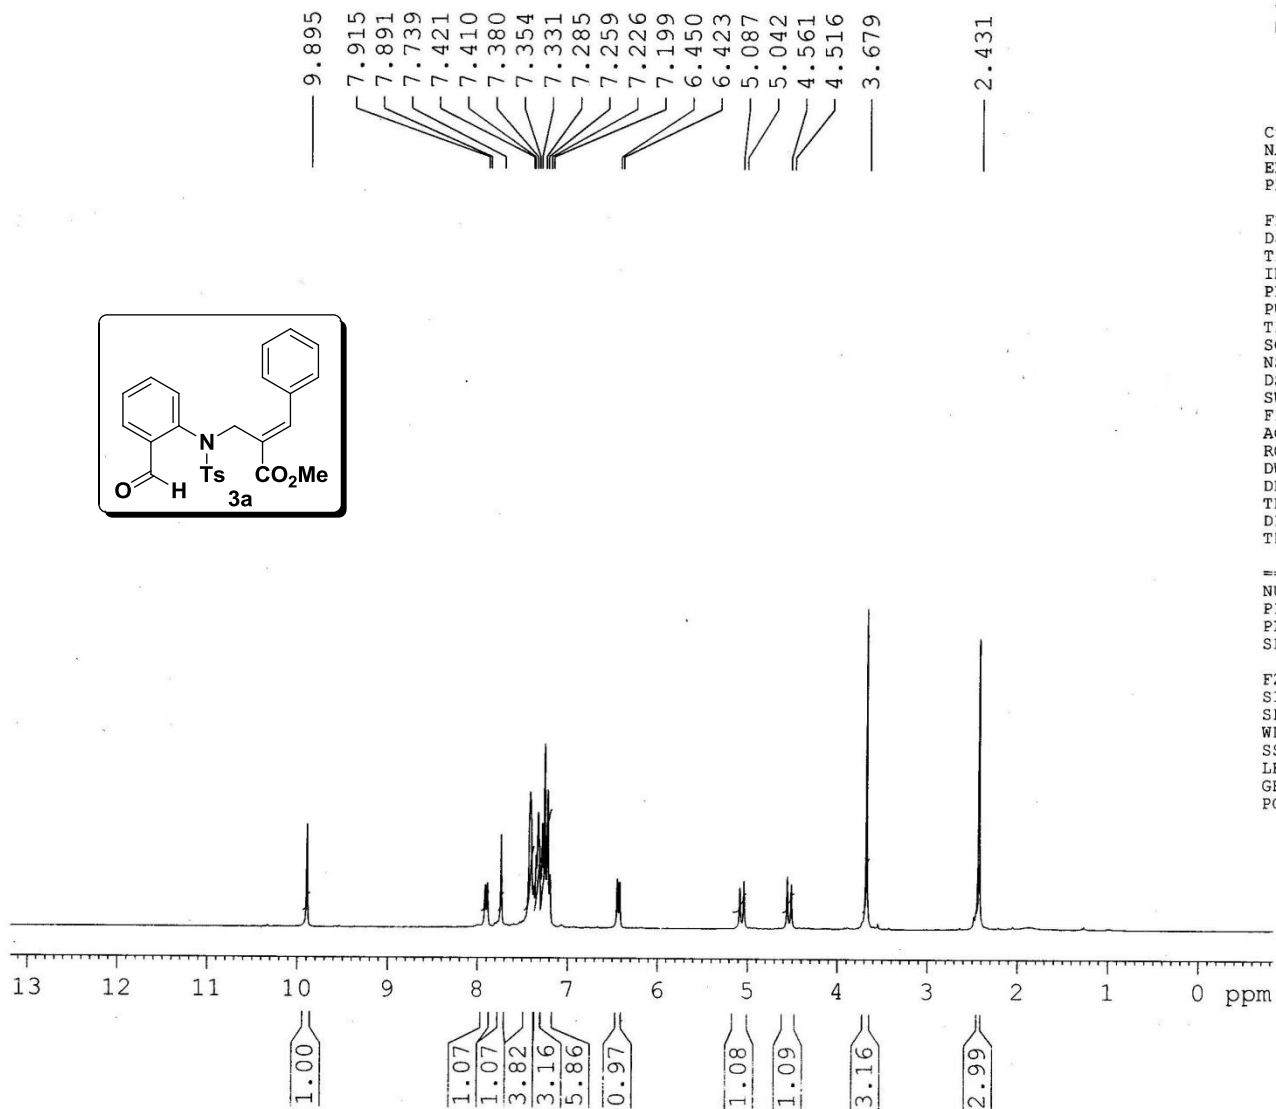

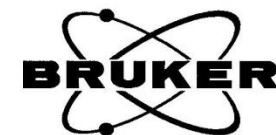

Current Data Parameters  
NAME DK-V-N-Ts-H-EST  
EXPNO 2  
PROCNO 1

F2 - Acquisition Parameters  
Date\_ 20110910  
Time\_ 16.24  
INSTRUM spect  
PROBHD 5 mm DUL 13C-1  
PULPROG zgpg30  
TD 65536  
SOLVENT CDCl3  
NS 230  
DS 4  
SWH 17985.611 Hz  
FIDRES 0.274439 Hz  
AQ 1.8219508 sec  
RG 5792.6  
DW 27.800 usec  
DE 6.00 usec  
TE 300.0 K  
D1 2.00000000 sec  
d11 0.03000000 sec  
DELTA 1.89999998 sec  
TD0 1

===== CHANNEL f1 =====  
NUC1 13C  
P1 9.30 usec  
PL1 0.00 dB  
SFO1 75.4752953 MHz

===== CHANNEL f2 =====  
CPDPRG2 waltz16  
NUC2 1H  
PCPD2 80.00 usec  
PL2 0.00 dB  
PL12 15.68 dB  
PL13 16.00 dB  
SFO2 300.1312005 MHz

F2 - Processing parameters  
SI 32768  
SF 75.4677490 MHz  
WDW EM  
SSB 0  
LB 1.00 Hz  
GB 0  
PC 1.40

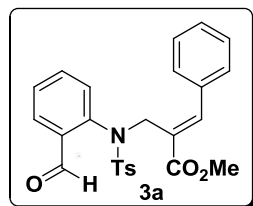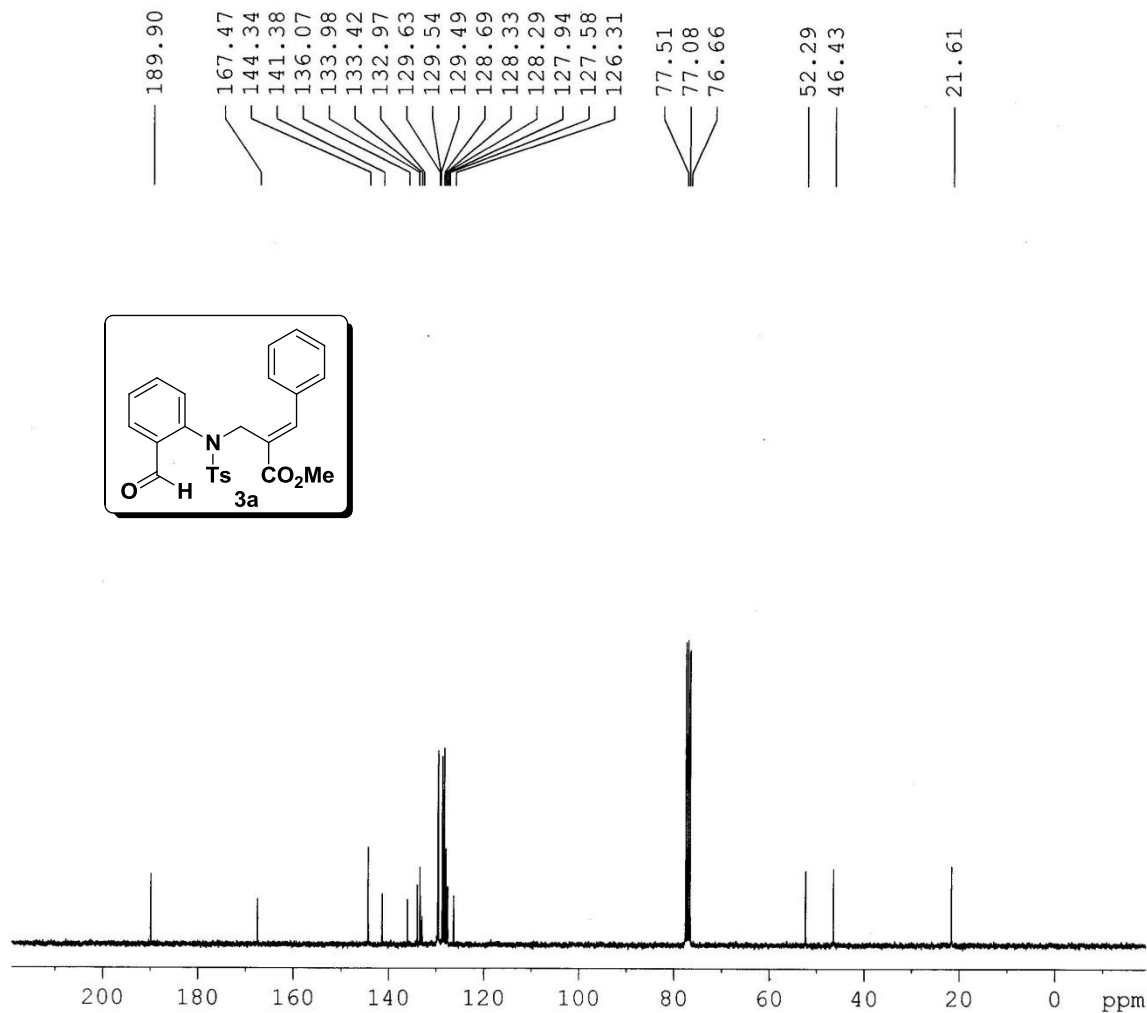

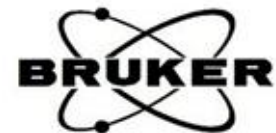

Current Data Parameters  
NAME VV-27F  
EXPNO 2  
PROCNO 1

F2 - Acquisition Parameters  
Date\_ 20120825  
Time\_ 11.14  
INSTRUM spect  
PROBHD 5 mm DUL 13C-1  
PULPROG zg30  
TD 65536  
SOLVENT CDCl3  
NS 8  
DS 2  
SWH 6172.839 Hz  
FIDRES 0.094190 Hz  
AQ 5.3084660 sec  
RG 322.5  
DW 81.000 usec  
DE 6.00 usec  
TE 300.0 K  
D1 1.00000000 sec  
TD0 1

----- CHANNEL f1 -----  
NUC1 1H  
P1 13.15 usec  
PL1 0.00 dB  
SFO1 300.1318534 MHz

F2 - Processing parameters  
SI 32768  
SF 300.1300055 MHz  
WDW EM  
SSB 0  
LB 0.30 Hz  
GB 0  
PC 1.00

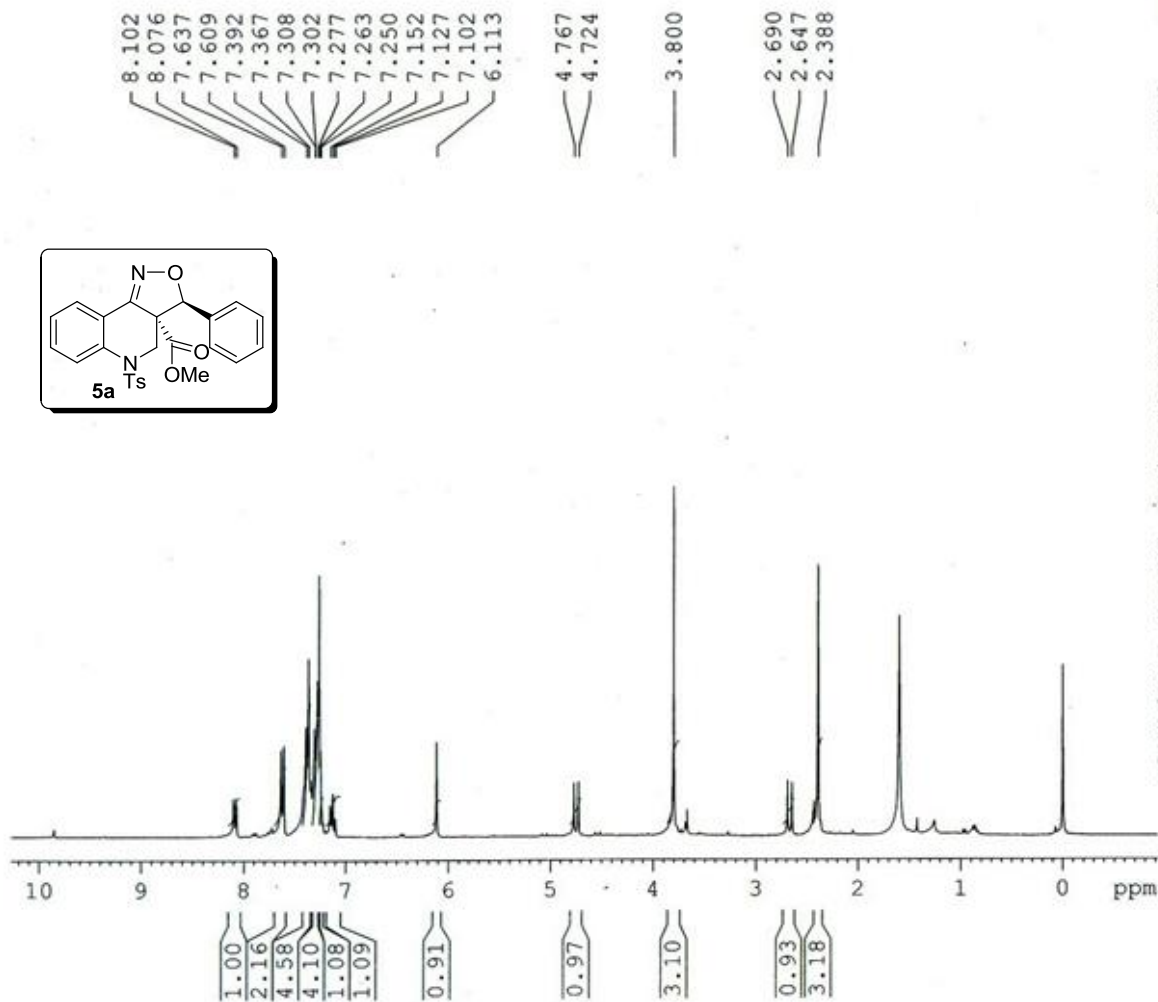



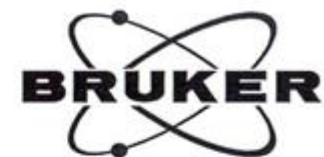

Current Data Parameters  
NAME vv-27  
EXPNO 2  
PROCNO 1

F2 - Acquisition Parameters  
Date\_ 20130730  
Time\_ 20.39  
INSTRUM spect  
PROBHD 5 mm DUL 13C-1  
PULPROG zgpg30  
TD 65536  
SOLVENT CDC13  
NS 825  
DS 4  
SWH 17985.611 Hz  
FIDRES 0.274439 Hz  
AQ 1.8219508 sec  
RG 574.7  
DW 27.800 usec  
DE 6.00 usec  
TE 300.0 K  
D1 2.00000000 sec  
d11 0.03000000 sec  
DELTA 1.899999998 sec  
TDO 1

===== CHANNEL f1 =====  
NUC1 13C  
P1 9.30 usec  
PL1 0.00 dB  
SFO1 75.4752953 MHz

===== CHANNEL f2 =====  
CPDPRG2 waltz16  
NUC2 1H  
PCPD2 80.00 usec  
PL2 0.00 dB  
PL12 15.68 dB  
PL13 16.00 dB  
SFO2 300.1312005 MHz

F2 - Processing parameters  
SI 32768  
SF 75.4677490 MHz  
WDW EM  
SSB 0  
LB 1.00 Hz  
GB 0  
PC 1.40

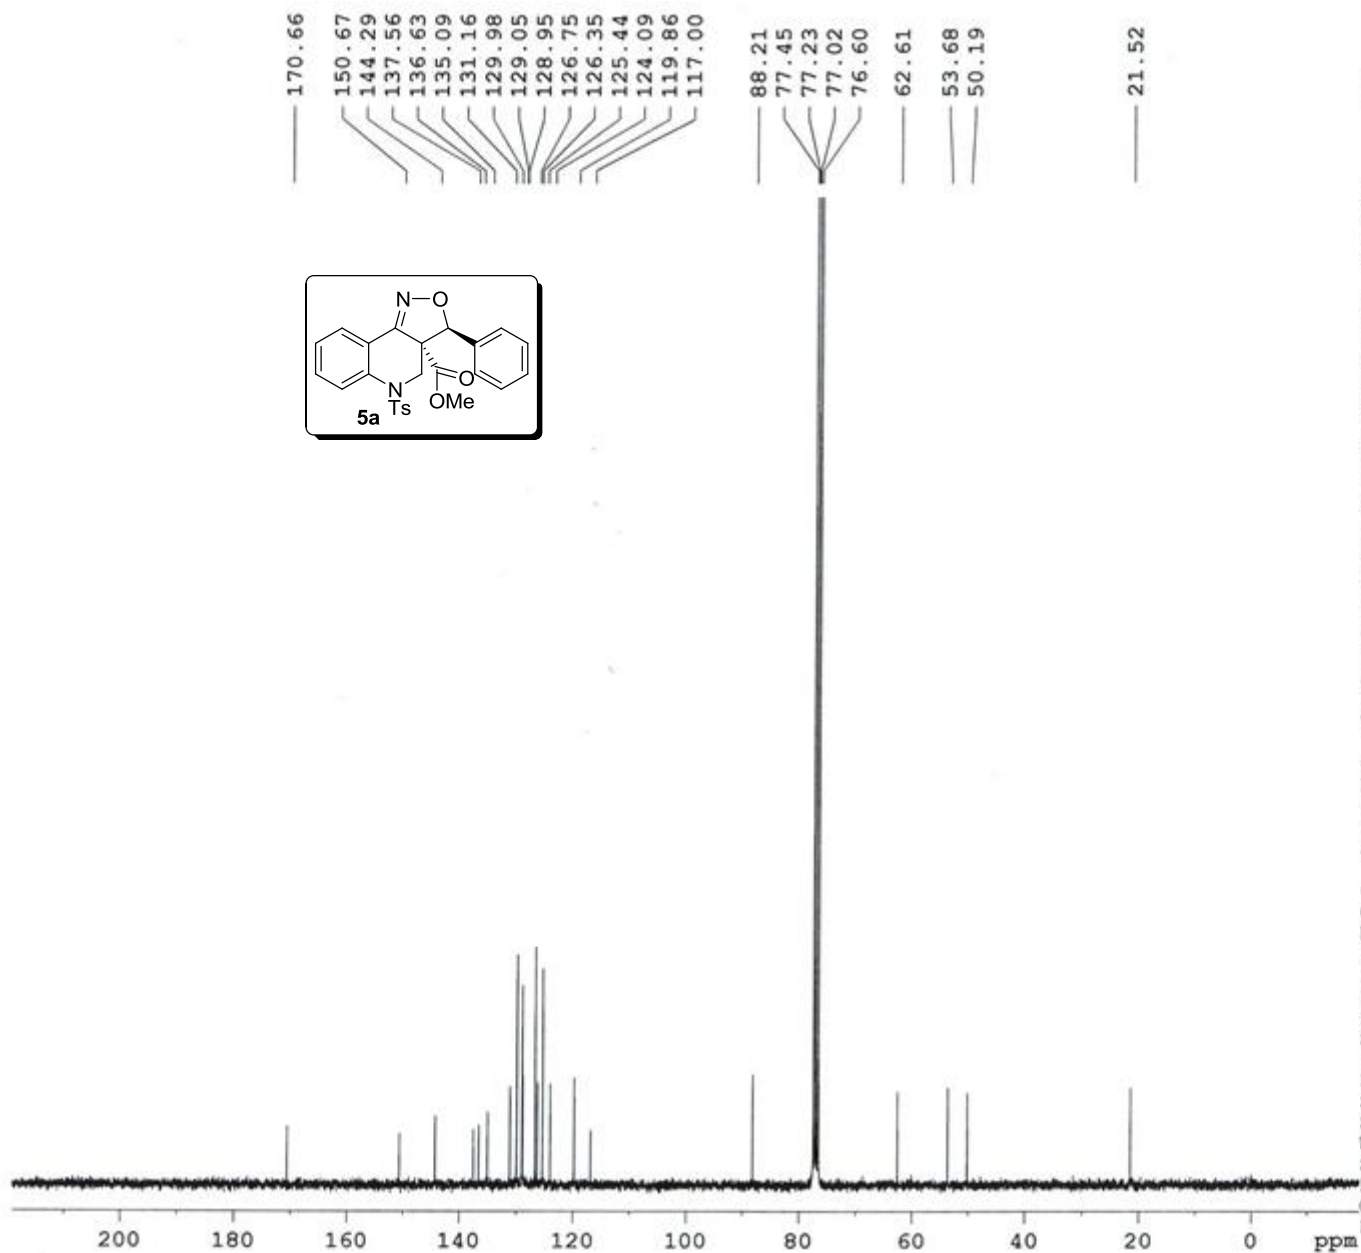

|               |        |             |                      |                 |                |                        |                     |
|---------------|--------|-------------|----------------------|-----------------|----------------|------------------------|---------------------|
| Sample Name   | W-27   | Position    |                      | Instrument Name | Q-TOF          | User Name              | QTOF-PU\admin       |
| Inj Vol       | -1     | InjPosition |                      | SampleType      | Sample         | IRM Calibration Status | Success             |
| Data Filename | W-27.d | ACQ Method  | Pondicherry Universi | Comment         | MM-MB-462.1249 | Acquired Time          | 18-11-2014 15:05:37 |

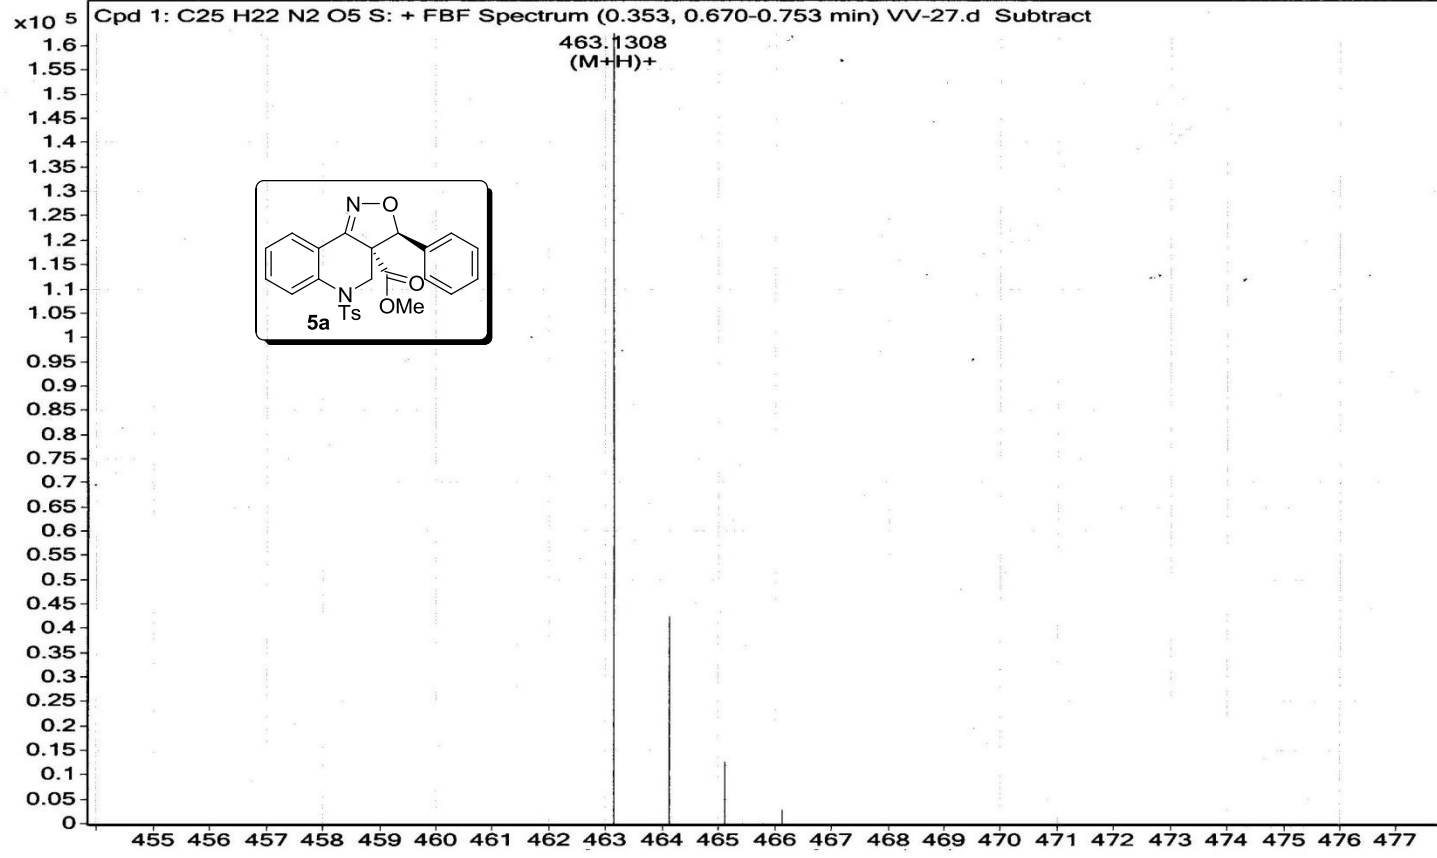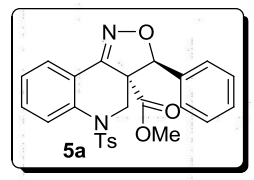

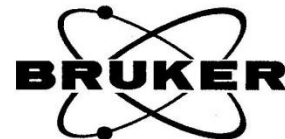

10.013  
7.939  
7.918  
7.914  
7.793  
7.764  
7.386  
7.362  
7.336  
7.325  
7.300  
7.273  
7.262  
7.235  
7.230  
7.210  
7.184  
7.160  
7.131  
7.014  
6.990  
6.273  
6.247  
4.939  
4.894  
4.379  
4.333  
3.757  
2.395  
1.958

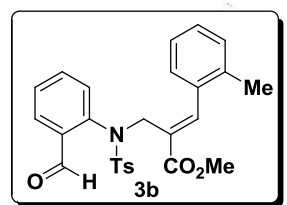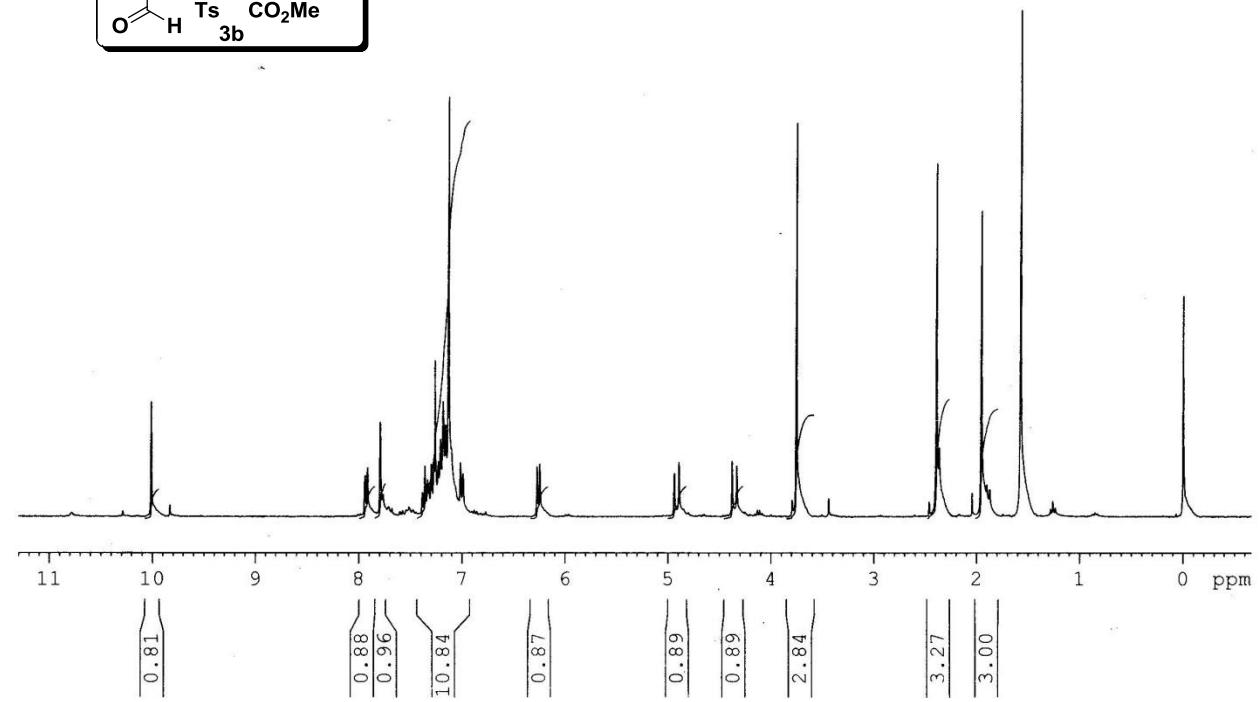

Current Data Parameters  
NAME DK-V-77  
EXPNO 1  
PROCNO 1

F2 - Acquisition Parameters  
Date\_ 20100701  
Time 18.02  
INSTRUM spect  
PROBHD 5 mm DUL 13C-1  
PULPROG zg30  
TD 65536  
SOLVENT CDCl3  
NS 16  
DS 2  
SWH 6172.839 Hz  
FIDRES 0.094190 Hz  
AQ 5.3084660 sec  
RG 456.1  
DW 81.000 usec  
DE 6.00 usec  
TE 300.0 K  
D1 1.0000000 sec  
TDO 1

===== CHANNEL f1 =====  
NUC1 1H  
P1 13.15 usec  
PL1 0.00 dB  
SFO1 300.1318534 MHz

F2 - Processing parameters  
SI 32768  
SF 300.1300060 MHz  
WDW EM  
SSB 0  
LB 0.30 Hz  
GB 0  
PC 1.00

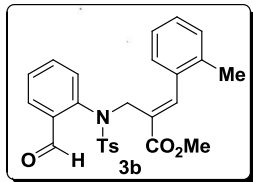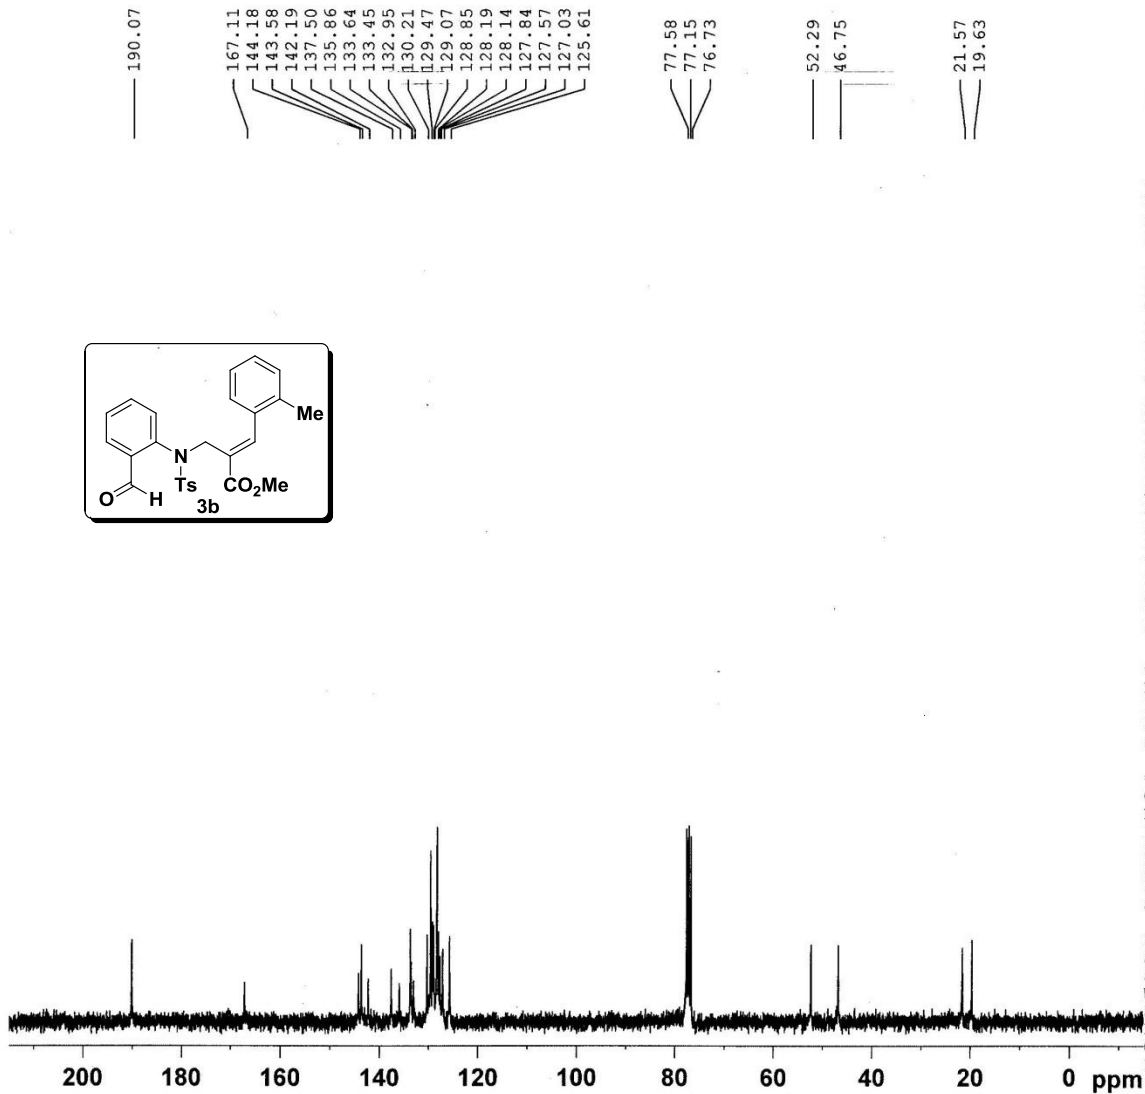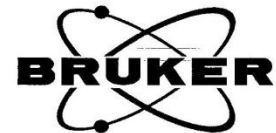

Current Data Parameters  
 NAME DK-V-2-Me-Est-CHO  
 EXPNO 2  
 PROCNO 1

F2 - Acquisition Parameters  
 Date\_ 20100914  
 Time 13.50  
 INSTRUM spect  
 PROBHD 5 mm DUL 13C-1  
 PULPROG zgpg30  
 TD 65536  
 SOLVENT CDCl3  
 NS 111  
 DS 4  
 SWH 17985.611 Hz  
 FIDRES 0.274439 Hz  
 AQ 1.8219508 sec  
 RG 512  
 DW 27.800 usec  
 DE 6.00 usec  
 TE 300.0 K  
 D1 2.00000000 sec  
 d11 0.03000000 sec  
 DELTA 1.89999998 sec  
 TDO 1

===== CHANNEL f1 =====  
 NUC1 13C  
 P1 7.40 usec  
 PL1 -2.00 dB  
 SFO1 75.4752953 MHz

===== CHANNEL f2 =====  
 CPDPRG2 waltz16  
 NUC2 1H  
 PCPD2 80.00 usec  
 PL2 0.00 dB  
 PL12 15.68 dB  
 PL13 16.00 dB  
 SFO2 300.1312005 MHz

F2 - Processing parameters  
 SI 32768  
 SF 75.4677490 MHz  
 WDW EM  
 SSB 0  
 LB 1.00 Hz  
 GB 0  
 PC 1.40

UNIV. OF MADRAS

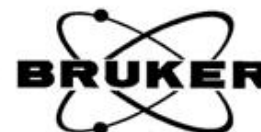

Current Data Parameters  
NAME VV-55F  
EXPNO 1  
PROCNO 1

F2 - Acquisition Parameters  
Date\_ 20150422  
Time 12.21  
INSTRUM spect  
PROBHD 5 mm DUL 13C-1  
PULPROG zg30  
TD 65536  
SOLVENT CDC13  
NS 16  
DS 2  
SWH 6172.839 Hz  
FIDRES 0.094190 Hz  
AQ 5.3084660 sec  
RG 203.2  
DW 81.000 usec  
DE 6.00 usec  
TE 300.0 K  
D1 1.00000000 sec  
TDO 1

----- CHANNEL f1 -----  
NUC1 1H  
P1 13.15 usec  
PL1 0.00 dB  
SFO1 300.1318534 MHz

F2 - Processing parameters  
SI 32768  
SF 300.130082 MHz  
WDW EM  
SSB 0  
LB 0.30 Hz  
GB 0  
PC 1.00

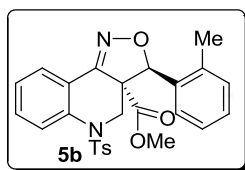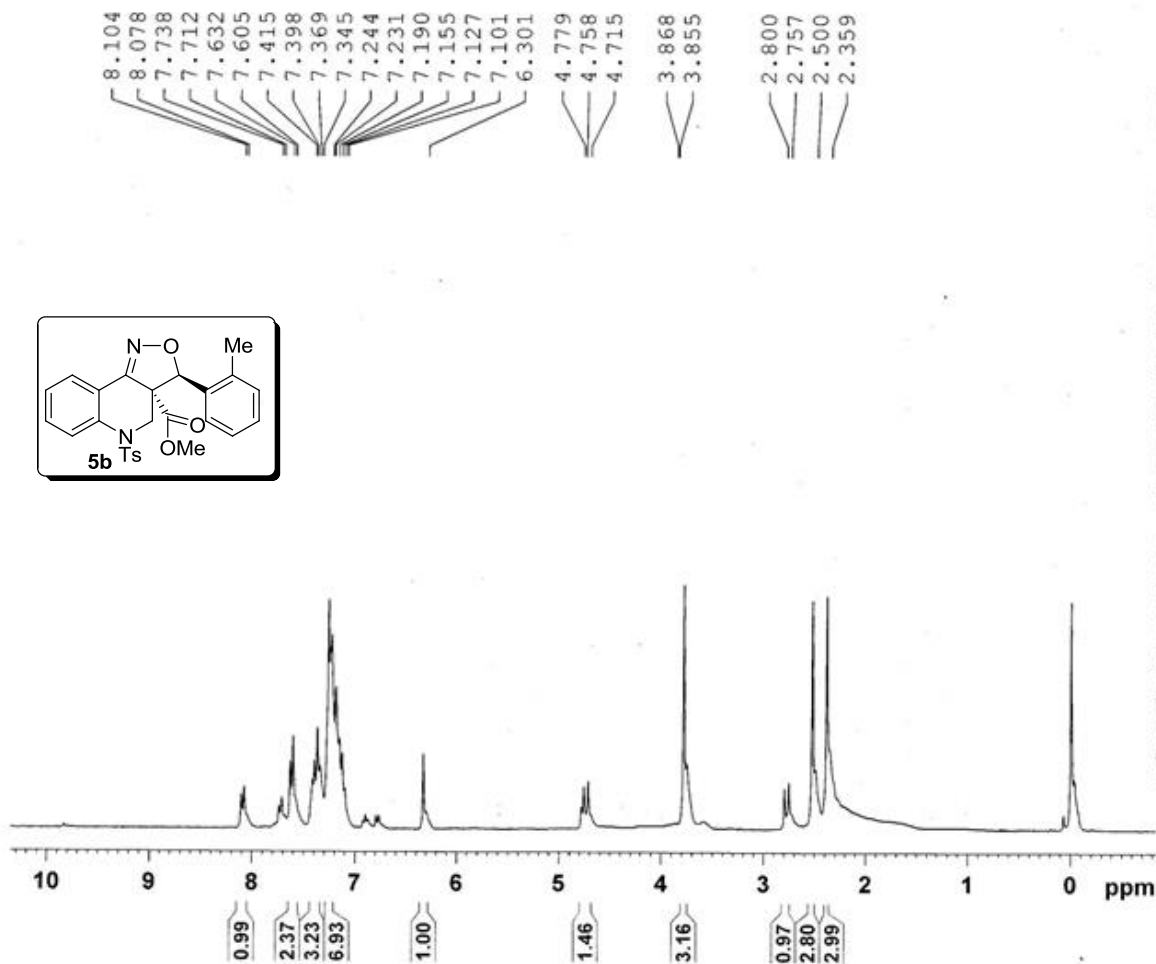

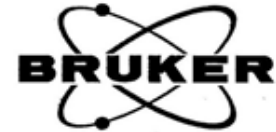

Current Data Parameters  
NAME VV-55-F  
EXPNO 1  
PROCNO 1

F2 - Acquisition Parameters  
Date\_ 20130307  
Time 17.56  
INSTRUM spect  
PROBHD 5 mm DUL 13C-1  
PULPROG zgpg30  
TD 65536  
SOLVENT CDCl3  
NS 1024  
DS 4  
SWH 17985.611 Hz  
FIDRES 0.274439 Hz  
AQ 1.8219508 sec  
RG 574.7  
DW 27.800 usec  
DE 6.00 usec  
TE 300.0 K  
D1 2.00000000 sec  
d11 0.03000000 sec  
DELTA 1.89999998 sec  
TDO 1

----- CHANNEL f1 -----  
NUC1 13C  
P1 9.30 usec  
PL1 0.00 dB  
SFO1 75.4752953 MHz

----- CHANNEL f2 -----  
CPDPRG2 waltz16  
NUC2 1H  
PCPD2 80.00 usec  
PL2 0.00 dB  
PL12 15.68 dB  
PL13 16.00 dB  
SFO2 300.1312005 MHz

F2 - Processing parameters  
SI 32768  
SF 75.4678253 MHz  
WDW EM  
SSB 0  
LB 1.00 Hz  
GB 0  
PC 1.40

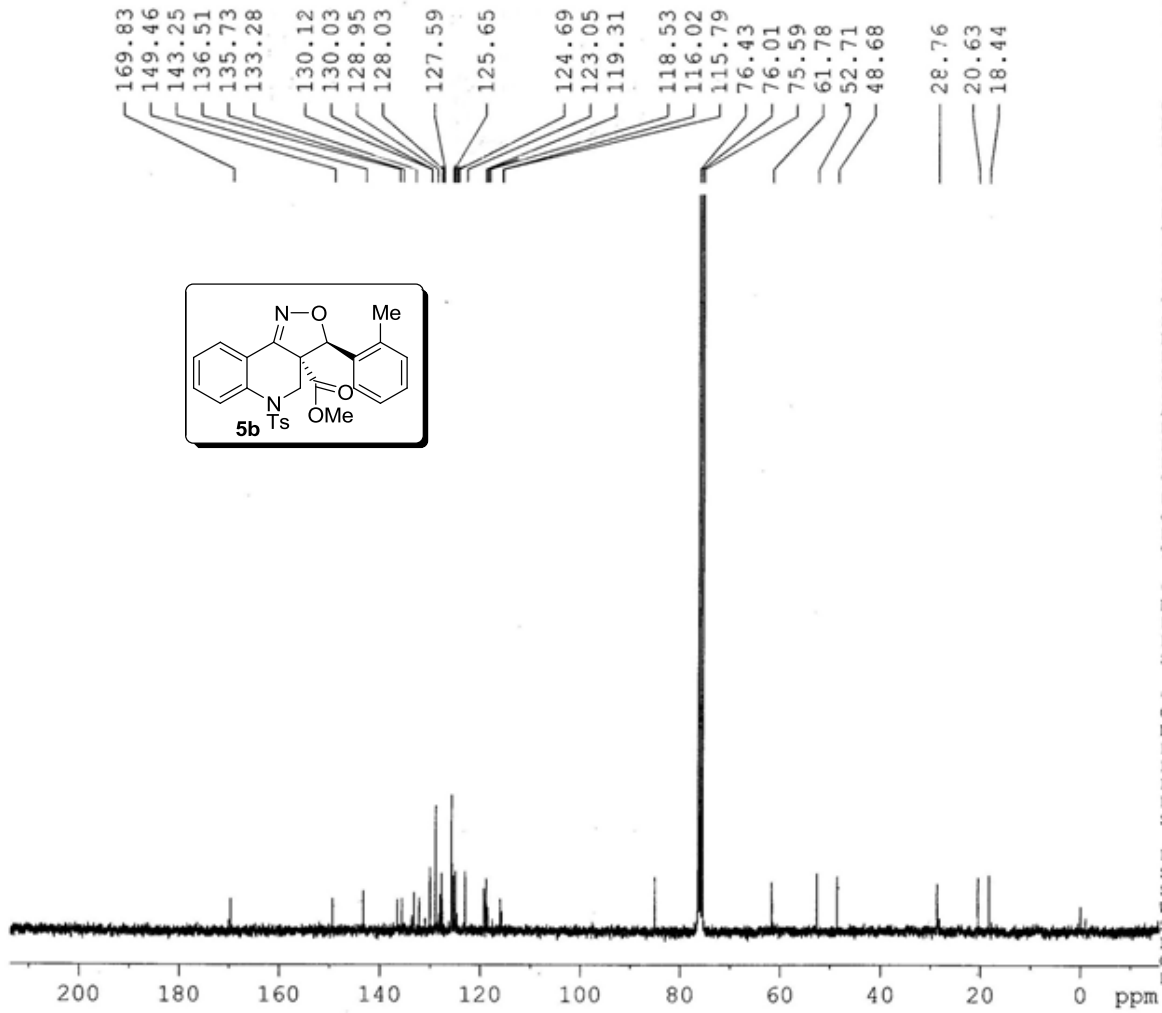

|               |           |             |                      |                 |                 |                        |                     |
|---------------|-----------|-------------|----------------------|-----------------|-----------------|------------------------|---------------------|
| Sample Name   | MM-55F    | Position    |                      | Instrument Name | Q-TOF           | User Name              | QTOF-PU\admin       |
| Inj Vol       | -1        | InjPosition |                      | SampleType      | Sample          | IRM Calibration Status | Success             |
| Data Filename | MM-55Fn.d | ACQ Method  | Pondicherry Universi | Comment         | MSK-MB-476.1406 | Acquired Time          | 05-06-2015 12:58:29 |

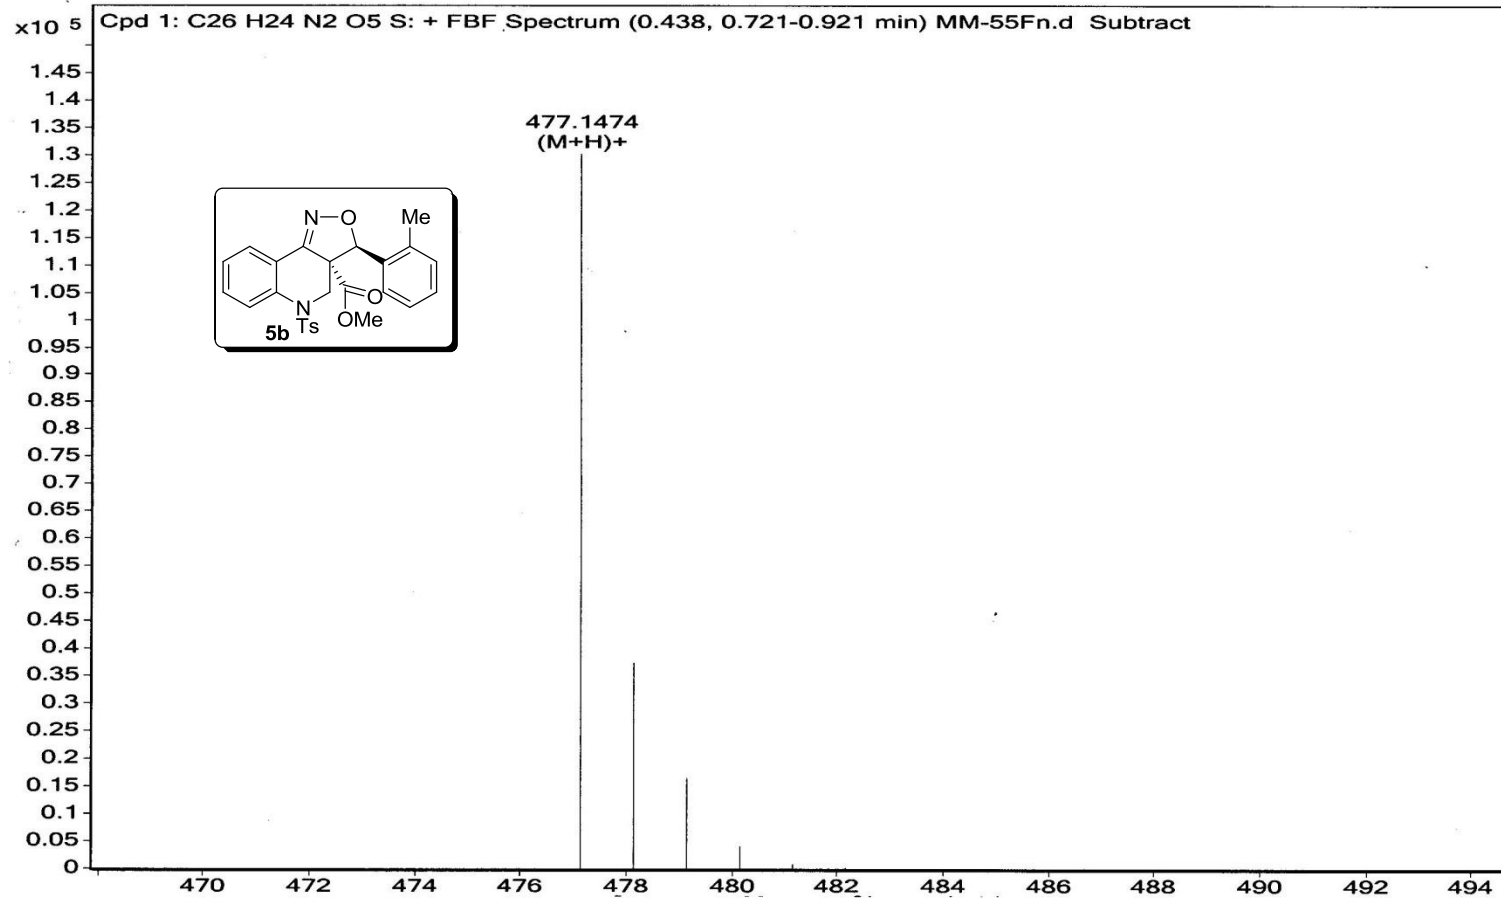

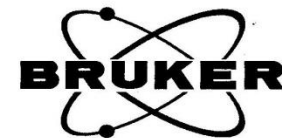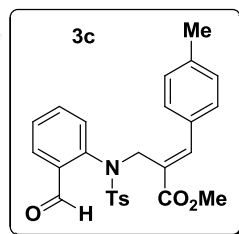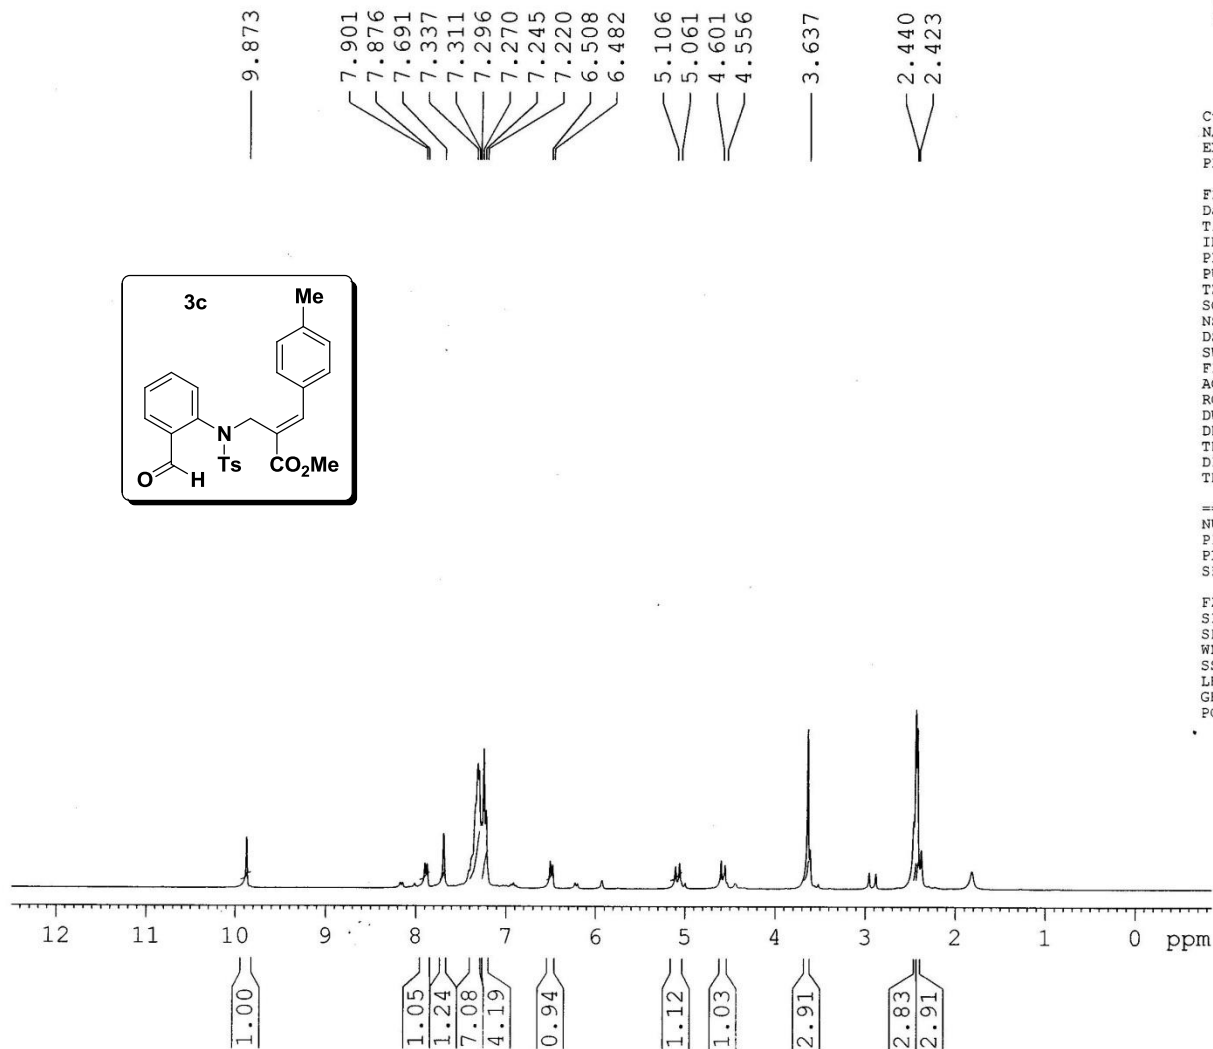

Current Data Parameters  
NAME DK-V-4-Me EST Ts-CHO  
EXPNO 1  
PROCNO 1

F2 - Acquisition Parameters  
Date\_ 20111009  
Time 17.42  
INSTRUM spect  
PROBHD 5 mm DUL 13C-1  
PULPROG zg30  
TD 65536  
SOLVENT CDCl3  
NS 16  
DS 2  
SWH 6172.839 Hz  
FIDRES 0.094190 Hz  
AQ 5.3084660 sec  
RG 40.3  
DW 81.000 usec  
DE 6.00 usec  
TE 300.0 K  
D1 1.00000000 sec  
TDO 1

===== CHANNEL f1 =====  
NUC1 1H  
P1 13.15 usec  
PL1 0.00 dB  
SFO1 300.1318534 MHz

F2 - Processing parameters  
SI 32768  
SF 300.1300000 MHz  
WDW EM  
SSB 0  
LB 0.30 Hz  
GB 0  
PC 1.00



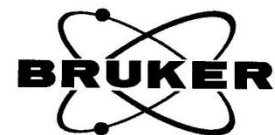

Current Data Parameters  
NAME DK-V-4-Me EST Ts-CHO  
EXPNO 2  
PROCNO 1

F2 - Acquisition Parameters  
Date\_ 20111009  
Time 17.50  
INSTRUM spect  
PROBHD 5 mm DUL 13C-1  
PULPROG zgpg30  
TD 65536  
SOLVENT CDCl3  
NS 200  
DS 4  
SWH 17985.611 Hz  
FIDRES 0.274439 Hz  
AQ 1.8219508 sec  
RG 1290.2  
DW 27.800 usec  
DE 6.00 usec  
TE 300.0 K  
D1 2.0000000 sec  
d11 0.0300000 sec  
DELTA 1.89999998 sec  
TDO 1

===== CHANNEL f1 =====  
NUC1 13C  
P1 9.30 usec  
PL1 0.00 dB  
SFO1 75.4752953 MHz

===== CHANNEL f2 =====  
CPDPRG2 waltz16  
NUC2 1H  
PCPD2 80.00 usec  
PL2 0.00 dB  
PL12 15.68 dB  
PL13 16.00 dB  
SFO2 300.1312005 MHz

F2 - Processing parameters  
SI 32768  
SF 75.4677490 MHz  
WDW EM  
SSB 0  
LB 1.00 Hz  
GB 0  
PC 1.40

189.96  
167.71  
144.62  
144.33  
141.18  
140.15  
136.20  
133.33  
132.96  
131.01  
129.98  
129.55  
129.47  
128.66  
128.34  
127.88  
127.70  
124.85  
77.51  
77.09  
76.67  
52.20  
46.39  
21.62  
21.47

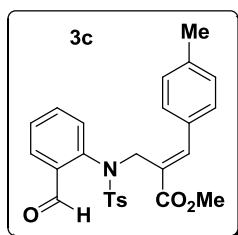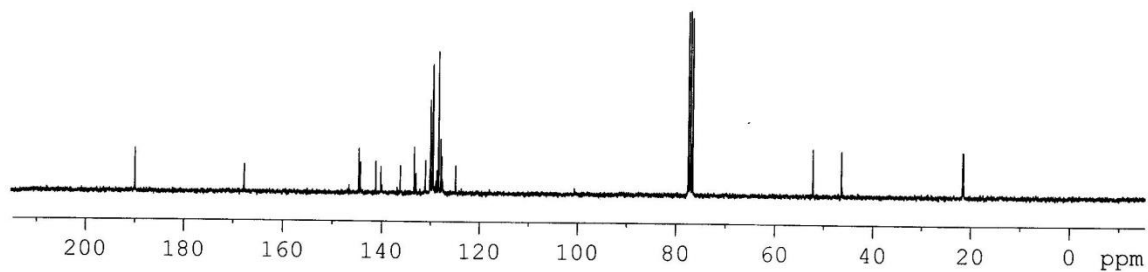

8.015  
7.992  
7.989  
7.573  
7.545  
7.316  
7.287  
7.204  
7.177  
7.154  
7.096  
7.066  
7.040  
7.016  
5.999  
4.687  
4.644  
3.706  
2.652  
2.609  
2.311  
2.266

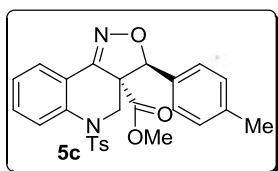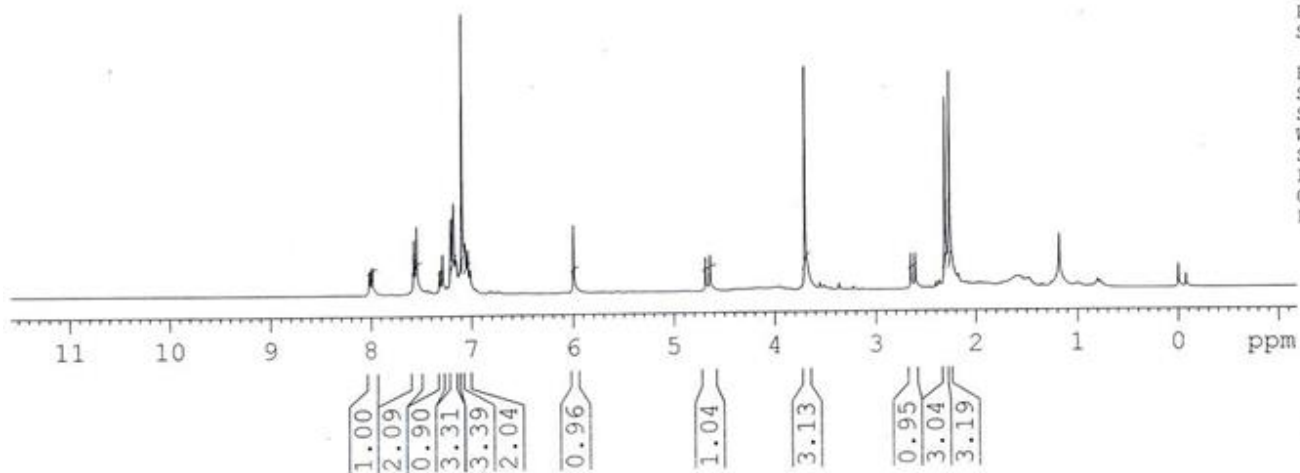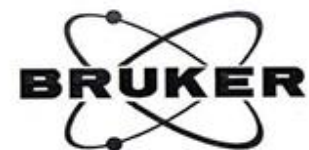

Current Data Parameters  
NAME VV-53F  
EXPNO 1  
PROCNO 1

F2 - Acquisition Parameters  
Date 20130312  
Time 23.44  
INSTRUM spect  
PROBHD 5 mm DUL 13C-1  
PULPROG zg30  
TD 65536  
SOLVENT CDCl3  
NS 8  
DS 2  
SWH 6172.839 Hz  
FIDRES 0.094190 Hz  
AQ 5.3084660 sec  
RG 90.5  
DW 81.000 usec  
DE 6.00 usec  
TE 300.0 K  
D1 1.00000000 sec  
TD0 1

===== CHANNEL f1 =====  
NUC1 1H  
P1 13.15 usec  
PL1 0.00 dB  
SFO1 300.1318534 MHz

F2 - Processing parameters  
SI 32768  
SF 300.1300297 MHz  
WDW EM  
SSB 0  
LB 0.30 Hz  
GB 0  
PC 1.00

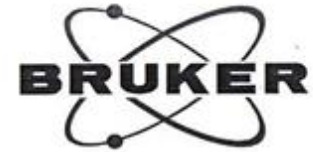

Current Data Parameters  
NAME VV-53F  
EXPNO 2  
PROCNO 1

F2 - Acquisition Parameters  
Date\_ 20130312  
Time\_ 23.49  
INSTRUM spect  
PROBHD 5 mm DUL 13C-1  
PULPROG zgpg30  
TD 65536  
SOLVENT CDC13  
NS 94  
DS 4  
SWH 17985.611 Hz  
FIDRES 0.274439 Hz  
AQ 1.8219508 sec  
RG 912.3  
DW 27.800 usec  
DE 6.00 usec  
TE 300.0 K  
D1 2.00000000 sec  
d11 0.03000000 sec  
DELTA 1.89999998 sec  
TDO 1

===== CHANNEL f1 =====  
NUC1 13C  
P1 9.30 usec  
PL1 0.00 dB  
SFO1 75.4752953 MHz

===== CHANNEL f2 =====  
CPDPRG2 waltz16  
NUC2 1H  
PCPD2 80.00 usec  
PL2 0.00 dB  
PL12 15.68 dB  
PL13 16.00 dB  
SFO2 300.1312005 MHz

F2 - Processing parameters  
SI 32768  
SF 75.4677490 MHz  
WDW EM  
SSB 0  
LB 1.00 Hz  
GB 0  
PC 1.40

170.77  
150.65  
144.28  
138.83  
137.61  
136.61  
132.04  
131.12  
129.98  
129.71  
126.80  
126.32  
125.38  
124.08  
119.89  
117.06  
88.28  
77.48  
77.05  
76.63  
62.54  
53.64  
50.11  
21.54  
21.19

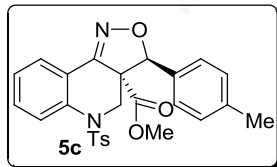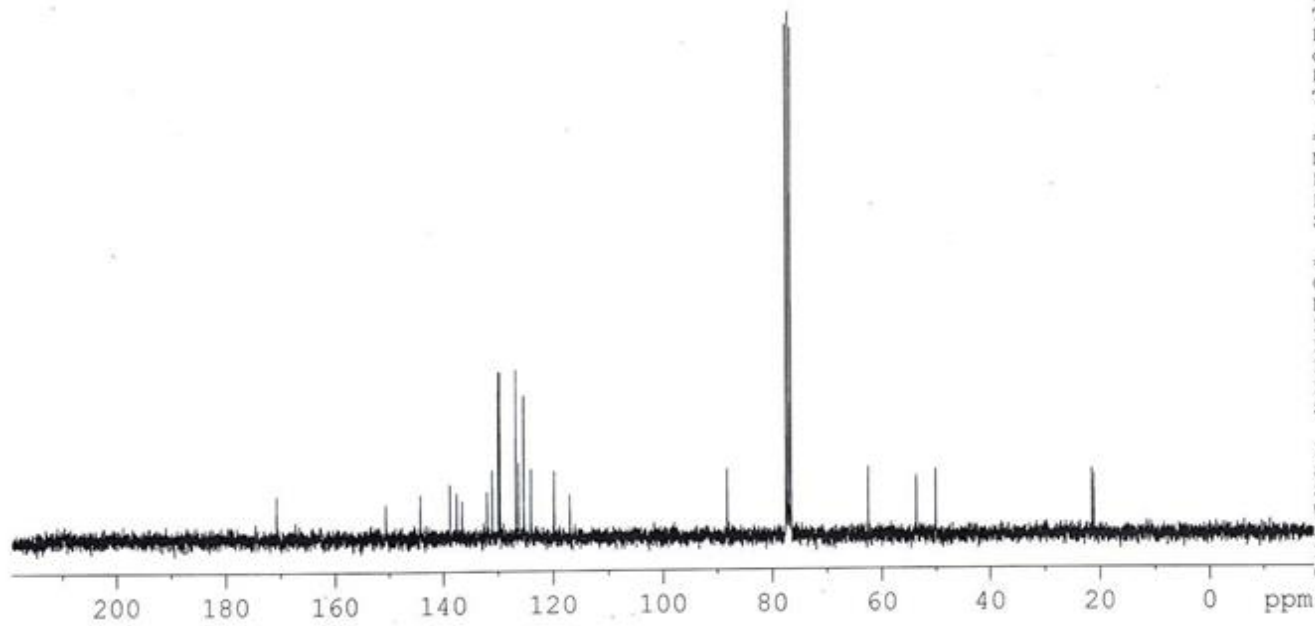

|               |          |             |                      |                 |                 |                        |                     |
|---------------|----------|-------------|----------------------|-----------------|-----------------|------------------------|---------------------|
| Sample Name   | MM-53F   | Position    |                      | Instrument Name | Q-TOF           | User Name              | QTOF-PU\admin       |
| Inj Vol       | -1       | InjPosition |                      | SampleType      | Sample          | IRM Calibration Status | Success             |
| Data Filename | MM-53F.d | ACQ Method  | Pondicherry Universi | Comment         | MSK-MB-476.1406 | Acquired Time          | 05-06-2015 13:32:25 |

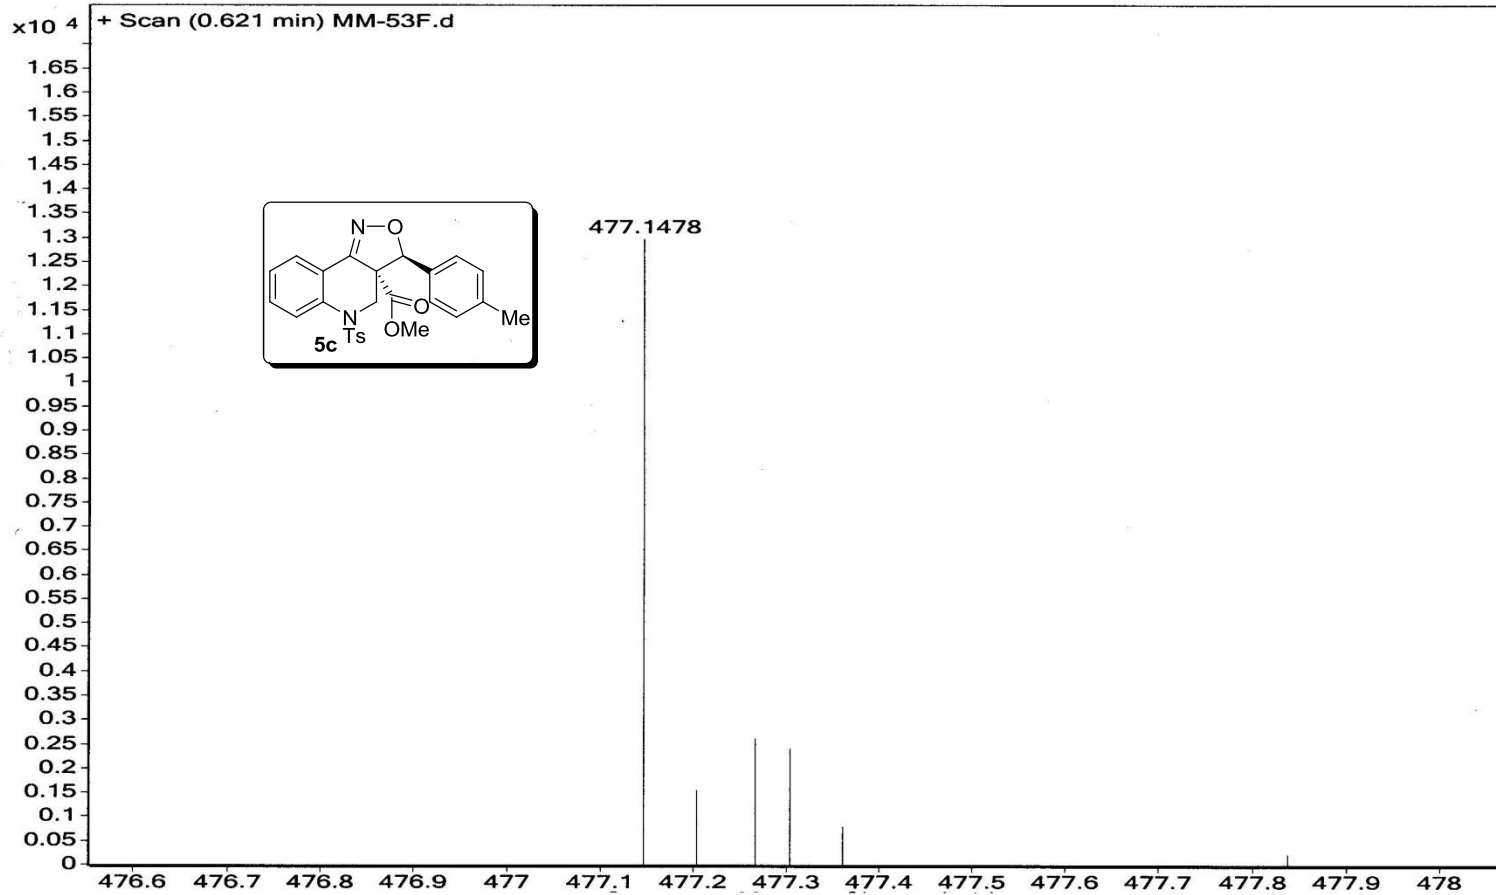

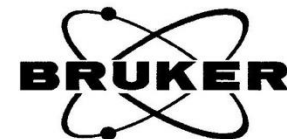

Current Data Parameters  
NAME VV-57  
EXPNO 1  
PROCNO 1

F2 - Acquisition Parameters  
Date\_ 20121201  
Time 19.10  
INSTRUM spect  
PROBHD 5 mm DUL 13C-1  
PULPROG zg30  
TD 65536  
SOLVENT CDC13  
NS 16  
DS 2  
SWH 6172.839 Hz  
FIDRES 0.094190 Hz  
AQ 5.3084660 sec  
RG 181  
DW 81.000 usec  
DE 6.00 usec  
TE 300.0 K  
D1 1.00000000 sec  
TDO 1

===== CHANNEL f1 =====  
NUC1 1H  
P1 13.15 usec  
PL1 0.00 dB  
SFO1 300.1318534 MHz

F2 - Processing parameters  
SI 32768  
SF 300.1300050 MHz  
WDW EM  
SSB 0  
LB 0.30 Hz  
GB 0  
PC 1.00

9.793  
7.899  
7.874  
7.820  
7.399  
7.372  
7.350  
7.330  
7.304  
7.287  
7.265  
7.261  
7.239  
7.210  
7.182  
7.001  
6.976  
6.951  
6.853  
6.825  
6.423  
6.397  
5.038  
4.993  
4.487  
4.442  
3.704  
3.692  
2.416

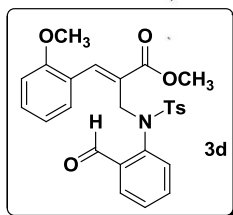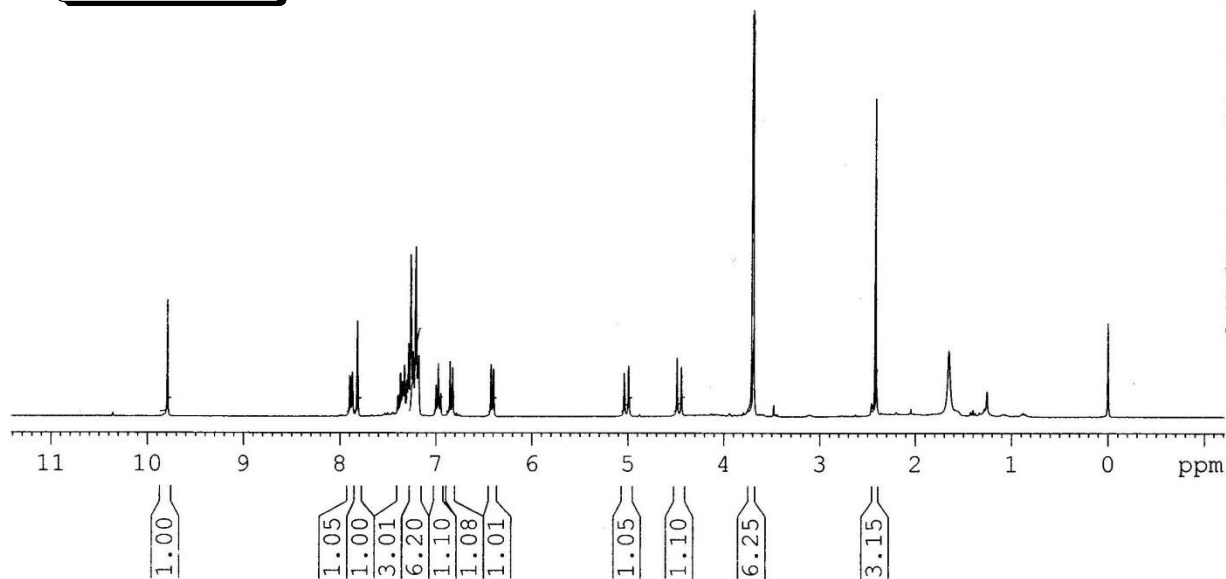

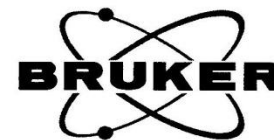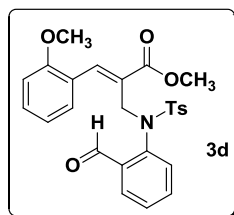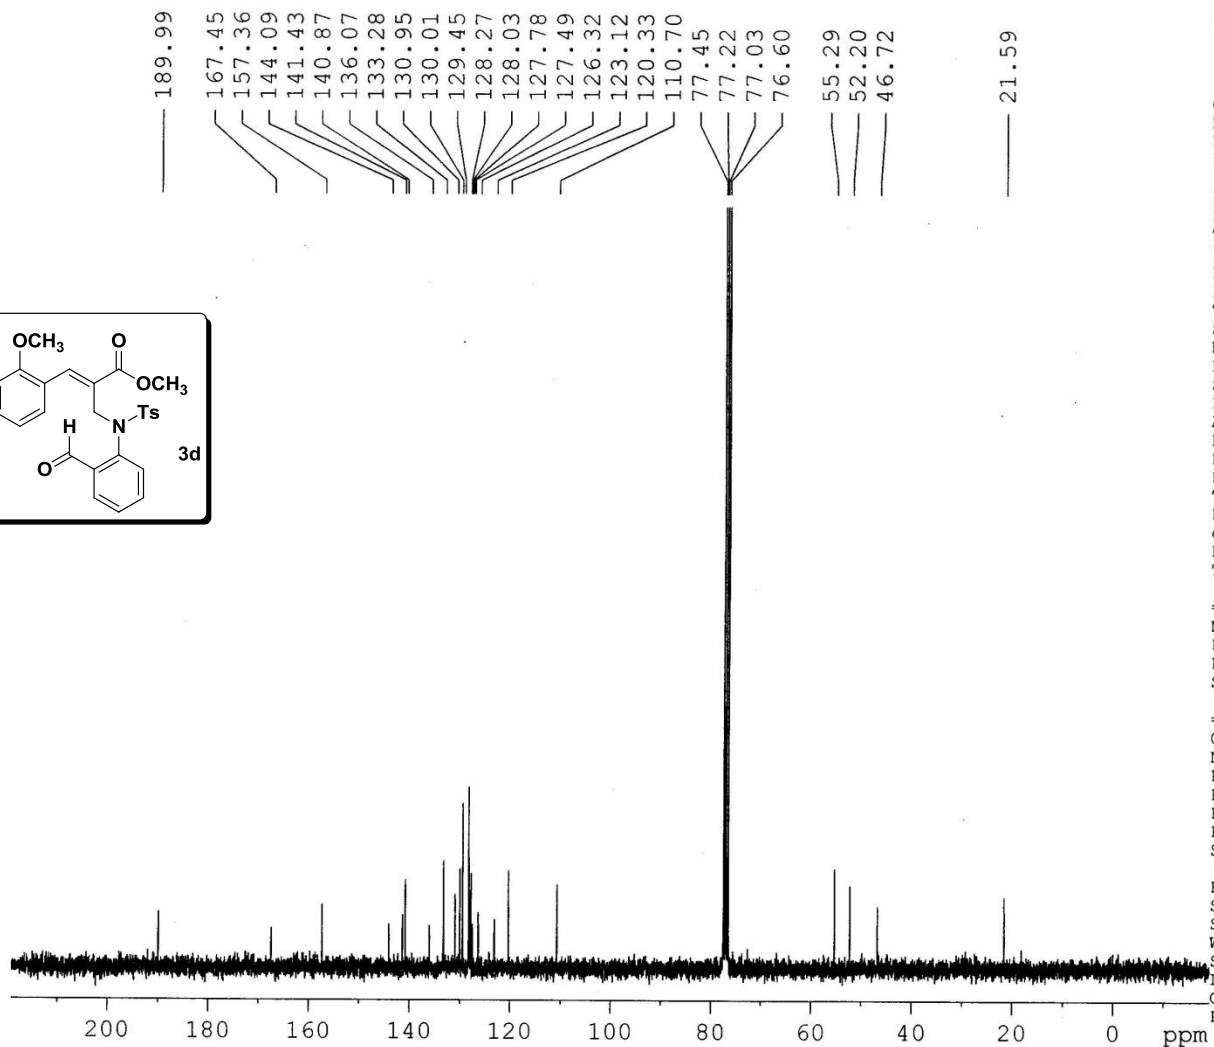

Current Data Parameters  
NAME VV-57  
EXPNO 2  
PROCNO 1

F2 - Acquisition Parameters  
Date\_ 20121201  
Time\_ 19.13  
INSTRUM spect  
PROBHD 5 mm DUL 13C-1  
PULPROG zgpg30  
TD 65536  
SOLVENT CDCl3  
NS 214  
DS 4  
SWH 17985.611 Hz  
FIDRES 0.274439 Hz  
AQ 1.8219508 sec  
RG 574.7  
DW 27.800 usec  
DE 6.00 usec  
TE 300.0 K  
D1 2.00000000 sec  
d11 0.03000000 sec  
DELTA 1.89999998 sec  
TDO 1

==== CHANNEL f1 =====  
NUC1 13C  
P1 9.30 usec  
PL1 0.00 dB  
SFO1 75.4752953 MHz

==== CHANNEL f2 =====  
CPDPRG2 waltz16  
NUC2 1H  
PCPD2 80.00 usec  
PL2 0.00 dB  
PL12 15.68 dB  
PL13 16.00 dB  
SFO2 300.1312005 MHz

F2 - Processing parameters  
SI 32768  
SF 75.4677490 MHz  
WDW EM  
SSB 0  
LB 1.00 Hz  
GB 0  
PC 1.40

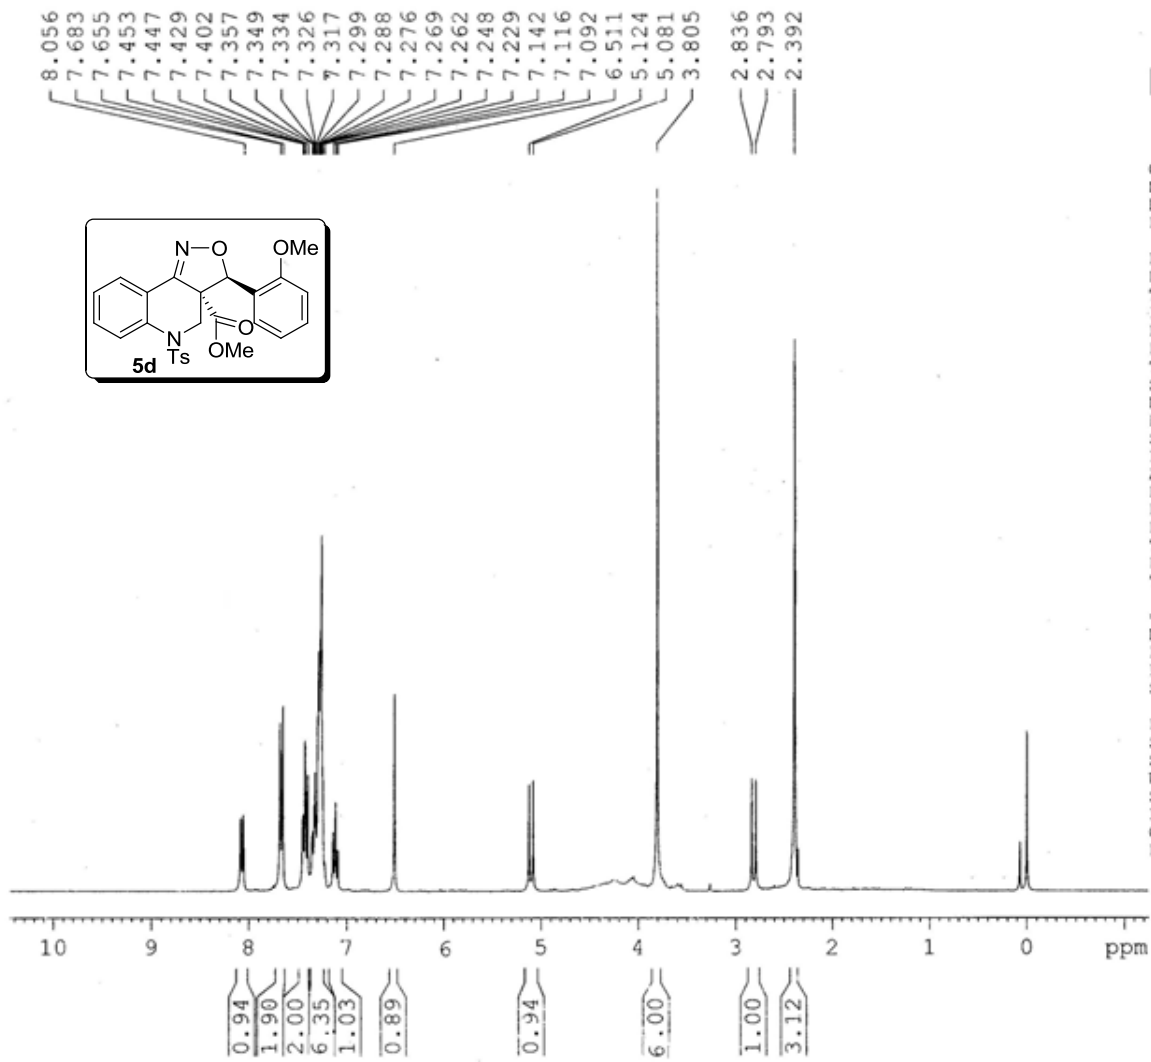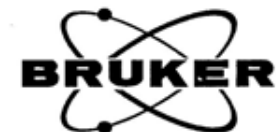

Current Data Parameters  
 NAME VV-57F  
 EXPNO 1  
 PROCNO 1

F2 - Acquisition Parameters  
 Date 20130205  
 Time 22.01  
 INSTRUM spect  
 PROBHD 5 mm DUL 13C-1  
 PULPROG zg30  
 TD 65536  
 SOLVENT CDCl3  
 NS 13  
 DS 2  
 SWH 6172.839 Hz  
 FIDRES 0.094190 Hz  
 AQ 5.3084660 sec  
 RG 161.3  
 DW 81.000 usec  
 DE 6.00 usec  
 TE 300.0 K  
 D1 1.00000000 sec  
 TD0 1

----- CHANNEL f1 -----  
 NUC1 1H  
 P1 13.15 usec  
 PL1 0.00 dB  
 SF01 300.1318534 MHz

F2 - Processing parameters  
 SI 32768  
 SF 300.1300060 MHz  
 WDW EM  
 SSB 0  
 LB 0.30 Hz  
 GB 0  
 PC 1.00

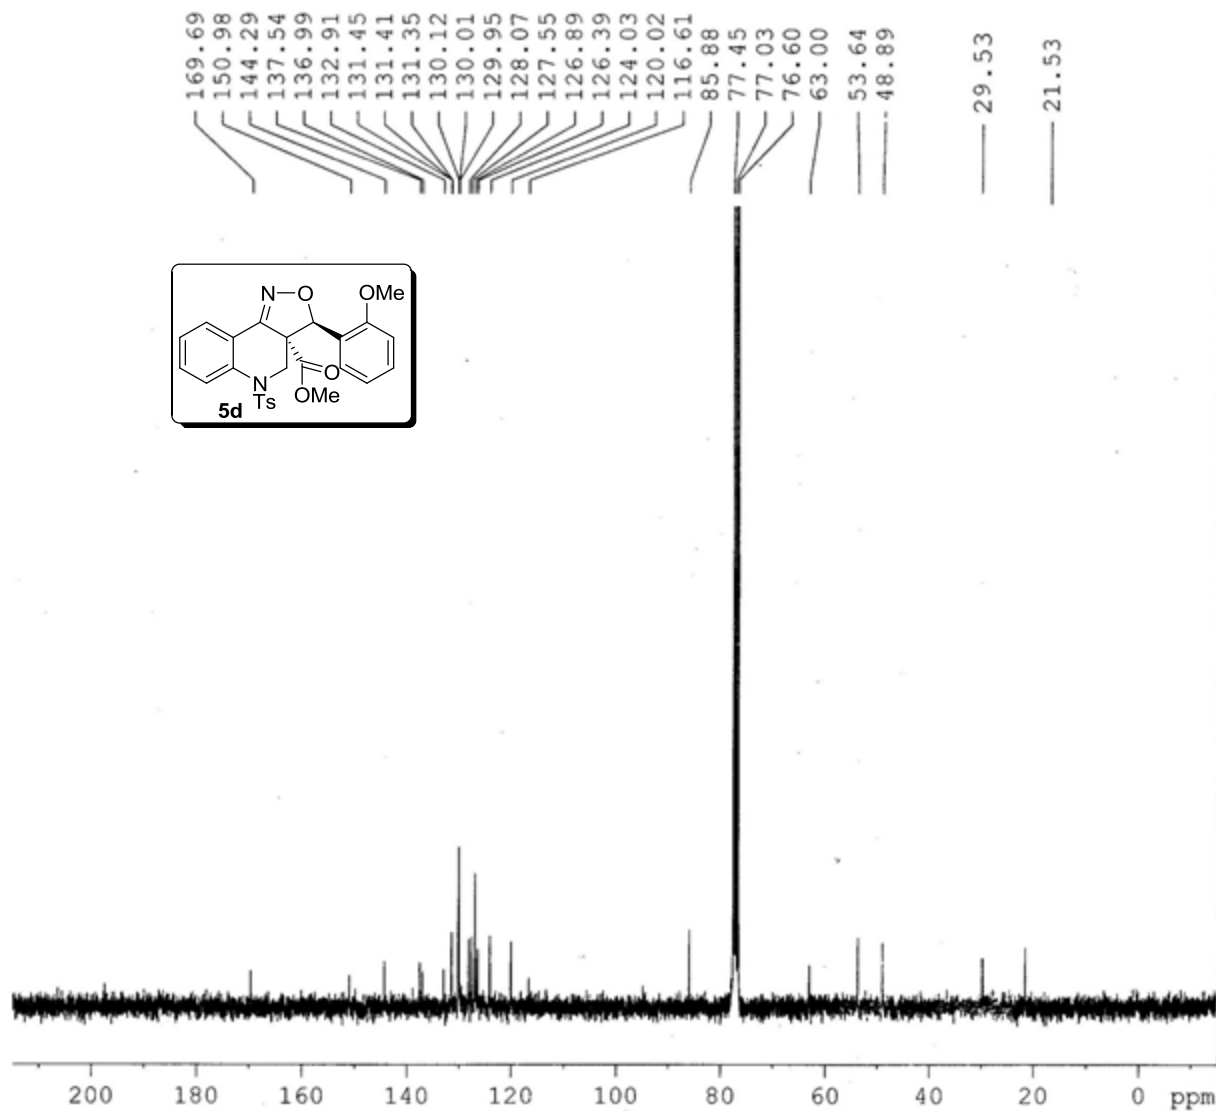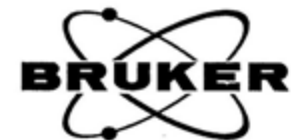

Current Data Parameters  
 NAME V.V.57F  
 EXPNO 1  
 PROCNO 1

F2 - Acquisition Parameters  
 Date\_ 20130206  
 Time\_ 19.26  
 INSTRUM spect  
 PROBHD 5 mm DUL 13C-1  
 PULPROG zgpg30  
 TD 65536  
 SOLVENT CDC13  
 NS 902  
 DS 4  
 SWH 17985.611 Hz  
 FIDRES 0.274439 Hz  
 AQ 1.8219508 sec  
 RG 1290.2  
 DW 27.800 usec  
 DE 6.00 usec  
 TE 300.0 K  
 D1 2.00000000 sec  
 d11 0.03000000 sec  
 DELTA 1.89999998 sec  
 TDO 1

----- CHANNEL f1 -----  
 NUC1 13C  
 P1 9.30 usec  
 PL1 0.00 dB  
 SFO1 75.4752953 MHz

----- CHANNEL f2 -----  
 CPDPRG2 waltz16  
 NUC2 1H  
 PCPD2 80.00 usec  
 PL2 0.00 dB  
 PL12 15.68 dB  
 PL13 16.00 dB  
 SFO2 300.1312005 MHz

F2 - Processing parameters  
 SI 32768  
 SF 75.4677490 MHz  
 NDW EM  
 SSB 0  
 LB 1.00 Hz  
 GB 0  
 PC 1.40



|               |           |             |                      |                 |                 |                        |                     |
|---------------|-----------|-------------|----------------------|-----------------|-----------------|------------------------|---------------------|
| Sample Name   | MM-57F    | Position    |                      | Instrument Name | Q-TOF           | User Name              | QTOF-PU\admin       |
| Inj Vol       | -1        | InjPosition |                      | SampleType      | Sample          | IRM Calibration Status | Success             |
| Data Filename | MM-57Fn.d | ACQ Method  | Pondicherry Universi | Comment         | MSK-MB-492.1355 | Acquired Time          | 05-06-2015 13:09:44 |

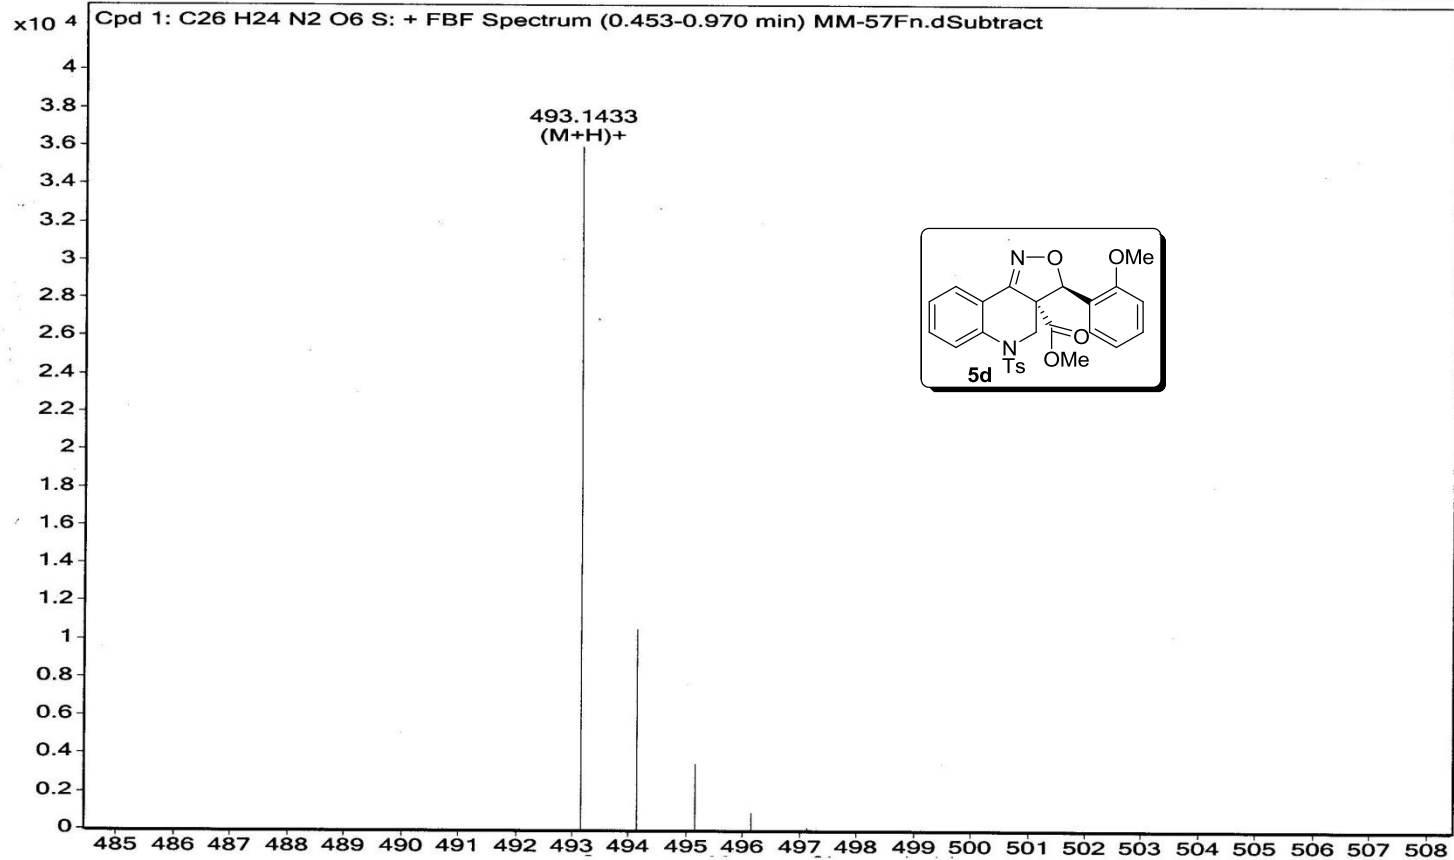

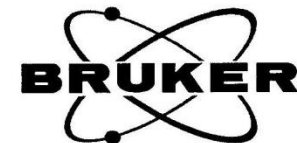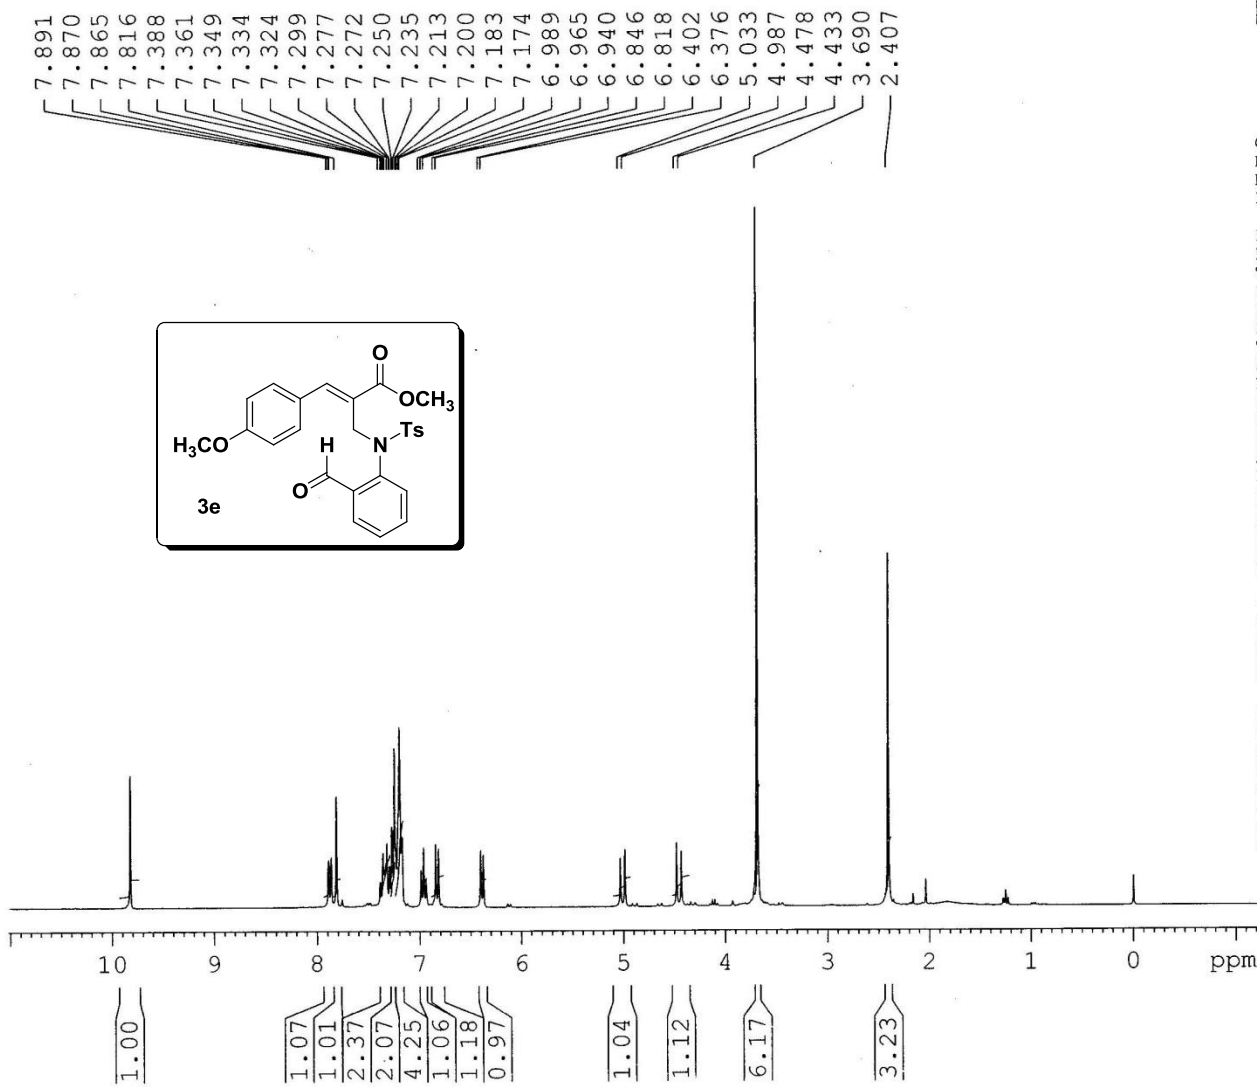

Current Data Parameters  
NAME DK-V-4-OME-TS-CHO  
EXPNO 1  
PROCNO 1

F2 - Acquisition Parameters  
Date\_ 20130305  
Time\_ 22.29  
INSTRUM spect  
PROBHD 5 mm DUL 13C-1  
PULPROG zg30  
TD 65536  
SOLVENT CDCl3  
NS 16  
DS 2  
SWH 6172.839 Hz  
FIDRES 0.094190 Hz  
AQ 5.3084660 sec  
RG 64  
DW 81.000 usec  
DE 6.00 usec  
TE 300.0 K  
D1 1.00000000 sec  
TD0 1

===== CHANNEL f1 =====  
NUC1 1H  
P1 13.15 usec  
PL1 0.00 dB  
SFO1 300.1318534 MHz

F2 - Processing parameters  
SI 32768  
SF 300.1300036 MHz  
WDW EM  
SSB 0  
LB 0.30 Hz  
GB 0  
PC 1.00

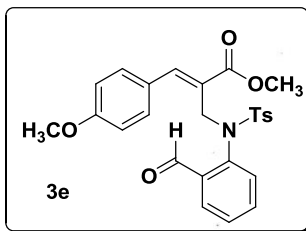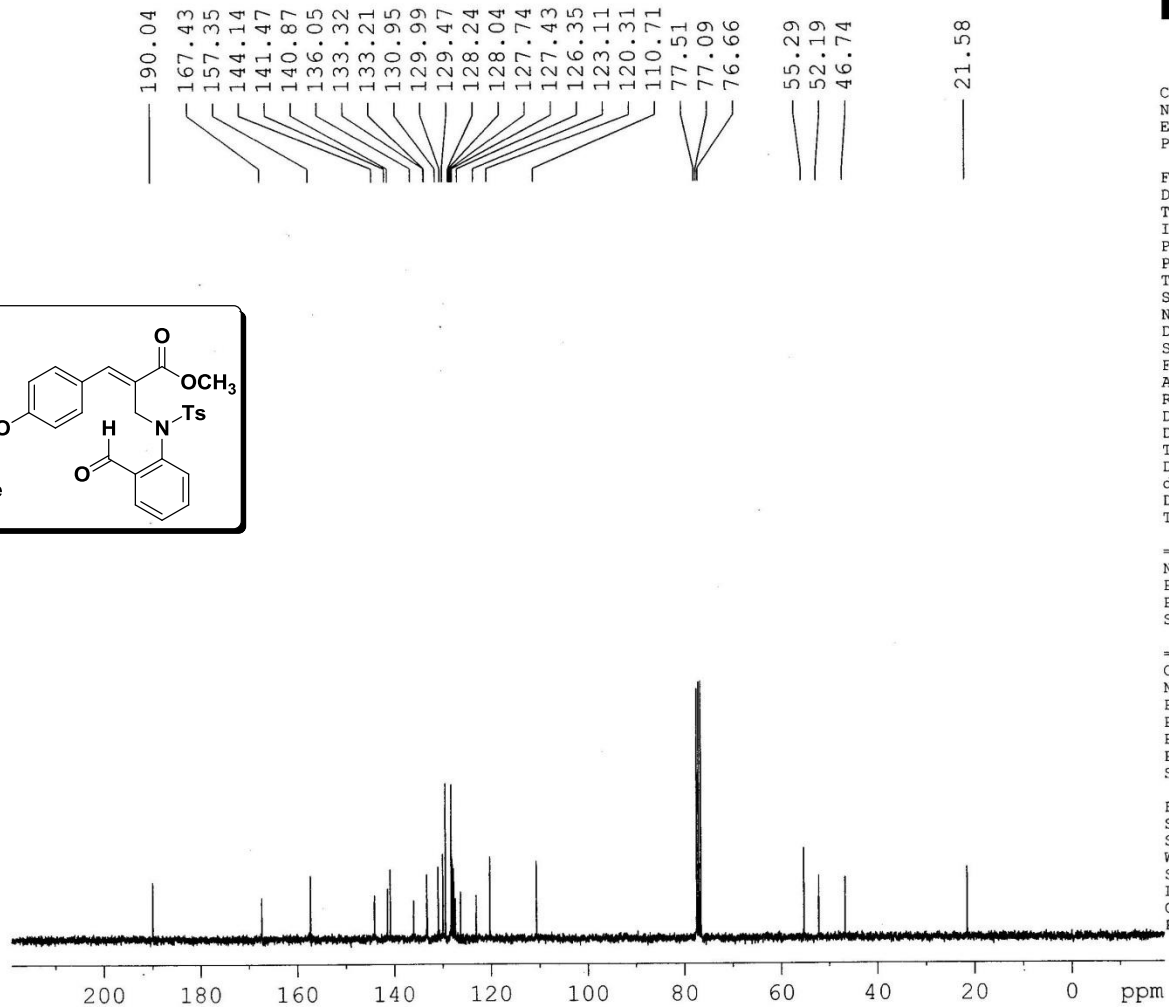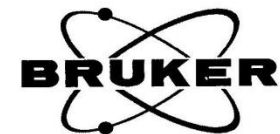

Current Data Parameters  
 NAME DK-V-4-OME-TS-CHO  
 EXPNO 2  
 PROCNO 1

F2 - Acquisition Parameters  
 Date 20130305  
 Time 22.36  
 INSTRUM spect  
 PROBHD 5 mm DUL 13C-1  
 PULPROG zgpg30  
 TD 65536  
 SOLVENT CDCl3  
 NS 96  
 DS 4  
 SWH 17985.611 Hz  
 FIDRES 0.274439 Hz  
 AQ 1.8219508 sec  
 RG 574.7  
 DW 27.800 usec  
 DE 6.00 usec  
 TE 300.0 K  
 D1 2.0000000 sec  
 d11 0.0300000 sec  
 DELTA 1.89999998 sec  
 TD0 1

===== CHANNEL f1 =====  
 NUC1 13C  
 P1 9.30 usec  
 PL1 0.00 dB  
 SFO1 75.4752953 MHz

===== CHANNEL f2 =====  
 CPDPRG2 waltz16  
 NUC2 1H  
 PCPD2 80.00 usec  
 PL2 0.00 dB  
 PL12 15.68 dB  
 PL13 16.00 dB  
 SFO2 300.1312005 MHz

F2 - Processing parameters  
 SI 32768  
 SF 75.4677490 MHz  
 WDW EM  
 SSB 0  
 LB 1.00 Hz  
 GB 0  
 PC 1.40

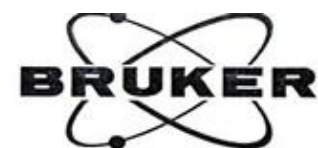

Current Data Parameters  
NAME VV-35F  
EXPNO 1  
PROCNO 1

F2 - Acquisition Parameters  
Date\_ 20121030  
Time 21.38  
INSTRUM spect  
PROBHD 5 mm DUL 13C-1  
PULPROG zg30  
TD 65536  
SOLVENT CDCl3  
NS 16  
DS 2  
SWH 6172.839 Hz  
FIDRES 0.094190 Hz  
AQ 5.3084660 sec  
RG 406.4  
DW 81.000 usec  
DE 6.00 usec  
TE 300.0 K  
D1 1.00000000 sec  
TD0 1

===== CHANNEL f1 =====  
NUC1 1H  
P1 13.15 usec  
PL1 0.00 dB  
SFO1 300.1316534 MHz

F2 - Processing parameters  
SI 32768  
SF 300.1300063 MHz  
WDW EM  
SSB 0  
LB 0.30 Hz  
GB 0  
PC 1.00

8.094  
8.069  
7.650  
7.623  
7.395  
7.367  
7.286  
7.262  
7.234  
7.218  
7.190  
7.149  
7.123  
7.098  
6.908  
6.880  
6.062  
4.750  
4.707  
3.807  
3.785  
2.744  
2.702  
2.394

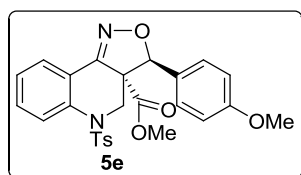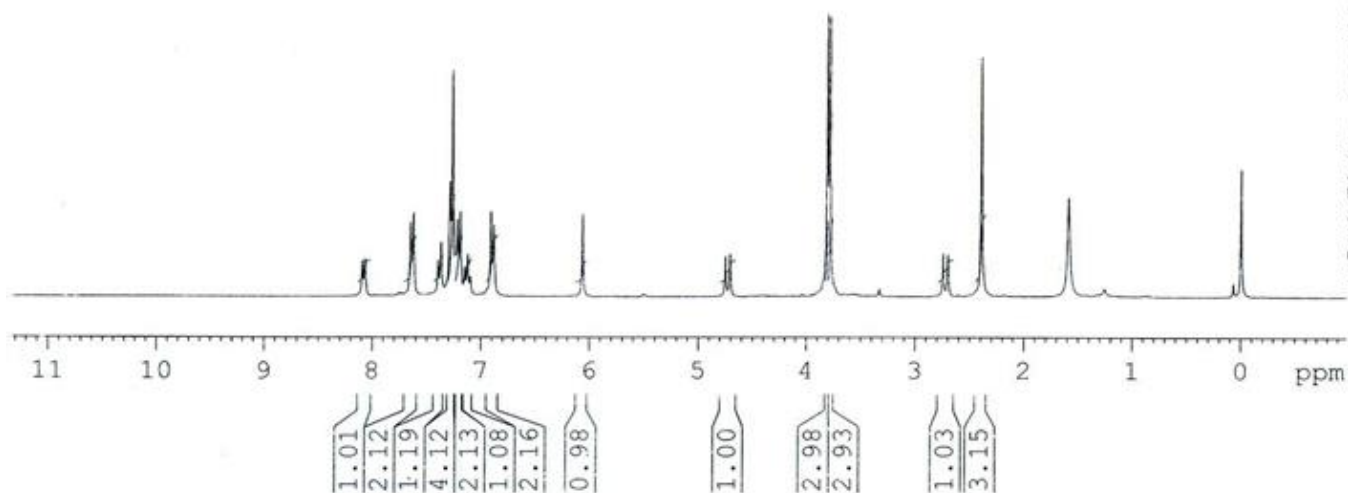

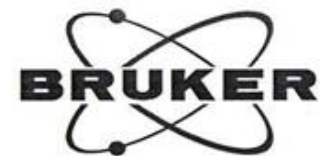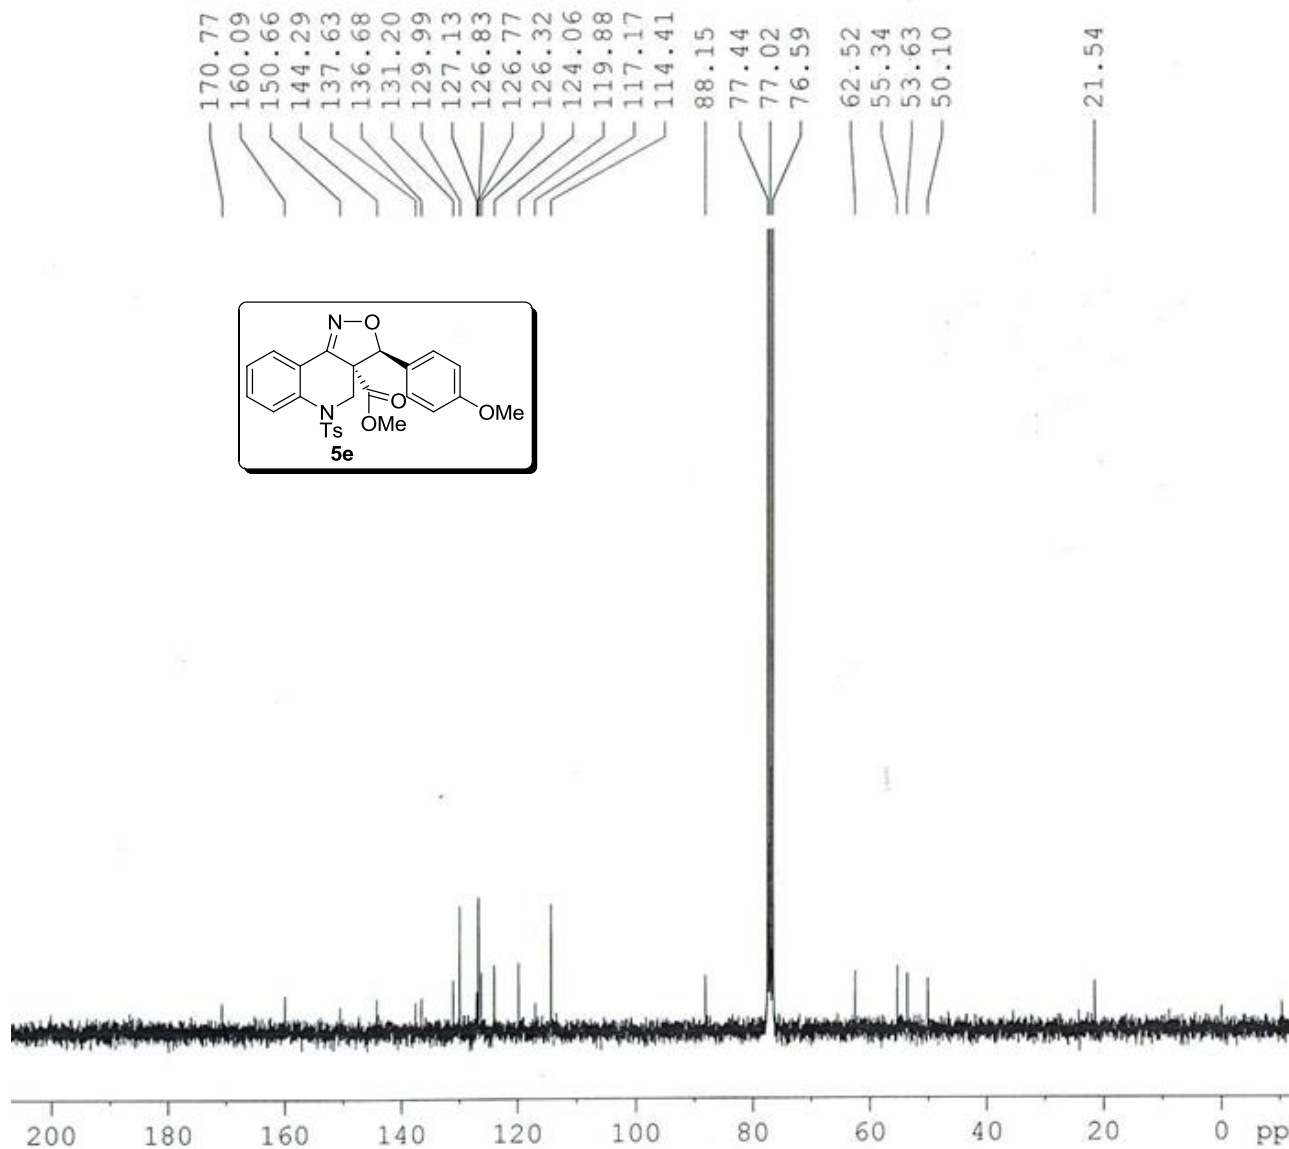

Current Data Parameters  
NAME VV-35F  
EXPNO 2  
PROCNO 1

F2 - Acquisition Parameters  
Date\_ 20121030  
Time\_ 22.11  
INSTRUM spect  
PROBHD 5 mm DUL 13C-1  
PULPROG zgpg30  
TD 65536  
SOLVENT CDCl3  
NS 501  
DS 4  
SWH 17985.611 Hz  
FIDRES 0.274439 Hz  
AQ 1.8219508 sec  
RG 456.1  
DW 27.800 usec  
DE 6.00 usec  
TE 300.0 K  
D1 2.00000000 sec  
d11 0.03000000 sec  
DELTA 1.89999998 sec  
TD0 1

==== CHANNEL f1 =====  
NUC1 13C  
P1 9.30 usec  
PL1 0.00 dB  
SFO1 75.4752953 MHz

==== CHANNEL f2 =====  
CPDPRG2 waltz16  
NUC2 1H  
PCPD2 80.00 usec  
PL2 0.00 dB  
PL12 15.68 dB  
PL13 16.00 dB  
SFO2 300.1312005 MHz

F2 - Processing parameters  
SI 32768  
SF 75.4677490 MHz  
WDW EM  
SSB 0  
LB 1.00 Hz  
GB 0  
PC 1.40

|               |          |             |                      |                 |                 |                        |                     |
|---------------|----------|-------------|----------------------|-----------------|-----------------|------------------------|---------------------|
| Sample Name   | MM-35F   | Position    |                      | Instrument Name | Q-TOF           | User Name              | QTOF-PU\admin       |
| Inj Vol       | -1       | InjPosition |                      | SampleType      | Sample          | IRM Calibration Status | Success             |
| Data Filename | MM-35F.d | ACQ Method  | Pondicherry Universi | Comment         | MSK-MB-492.1355 | Acquired Time          | 05-06-2015 13:09:44 |

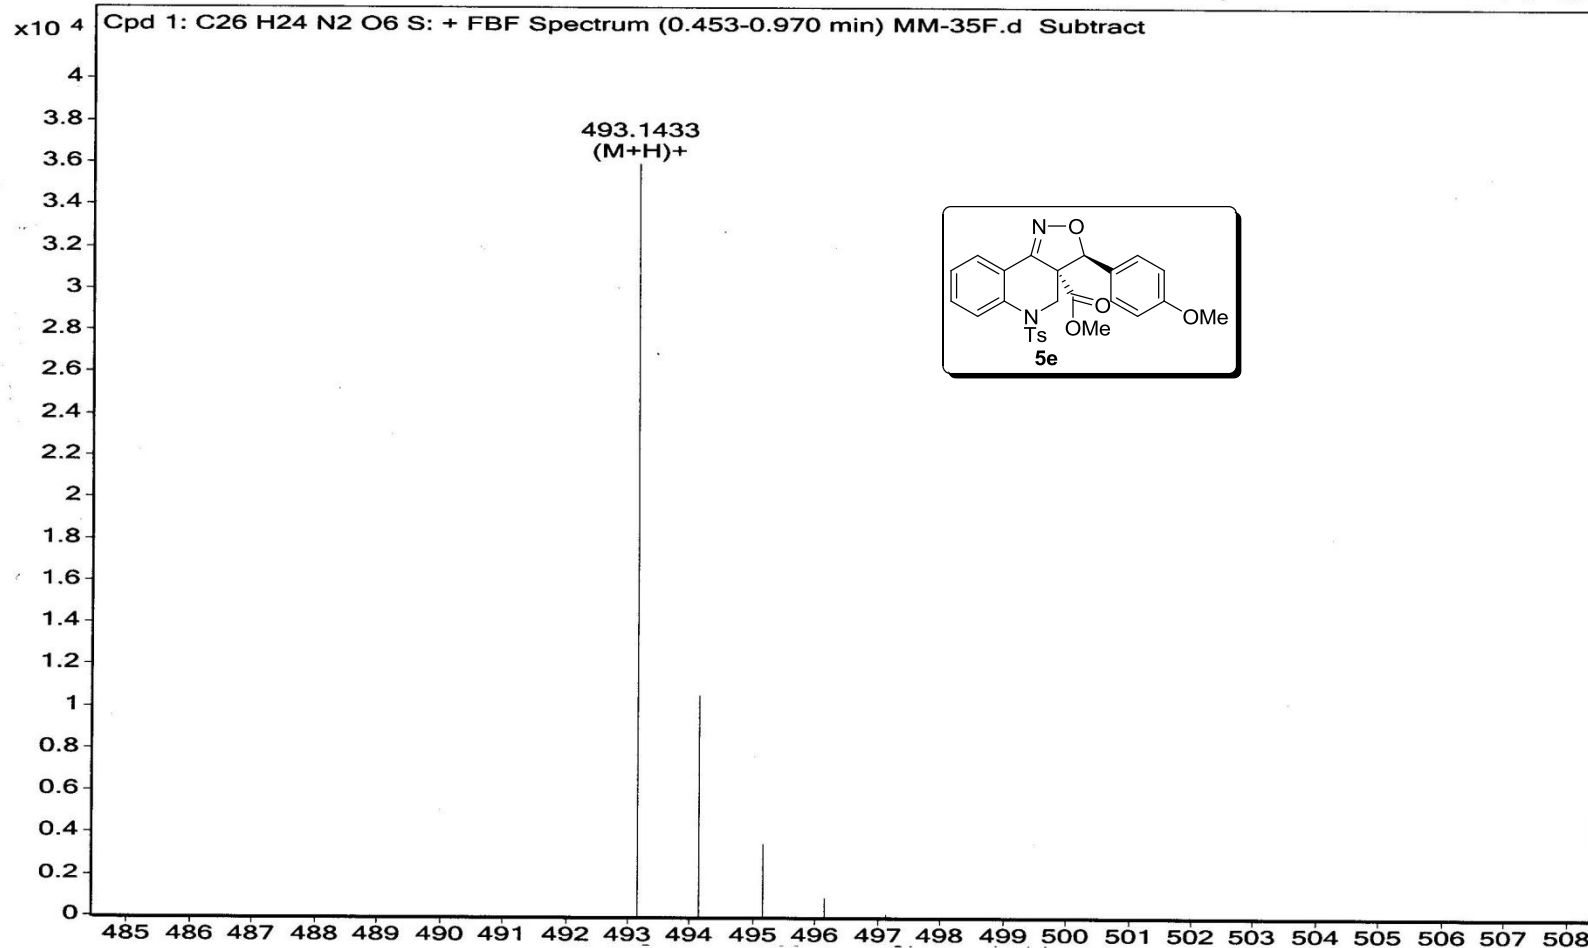

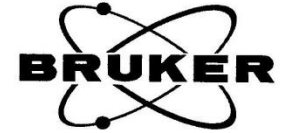

Current Data Parameters  
NAME DK-V-2-Cl-EST-CHO  
EXPNO 2  
PROCNO 1

F2 - Acquisition Parameters  
Date\_ 20130303  
Time 23.29  
INSTRUM spect  
PROBHD 5 mm DUL 13C-1  
PULPROG zg30  
TD 65536  
SOLVENT CDCl3  
NS 6  
DS 2  
SWH 6172.839 Hz  
FIDRES 0.094190 Hz  
AQ 5.3084660 sec  
RG 45.3  
DW 81.000 usec  
DE 6.00 usec  
TE 300.0 K  
D1 1.00000000 sec  
TD0 1

===== CHANNEL f1 =====  
NUC1 1H  
P1 13.15 usec  
PL1 0.00 dB  
SF01 300.1318534 MHz

F2 - Processing parameters  
SI 32768  
SF 300.1300011 MHz  
WDW EM  
SSB 0  
LB 0.30 Hz  
GB 0  
PC 1.00

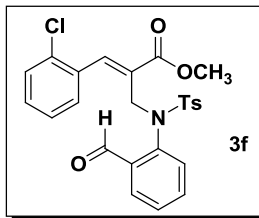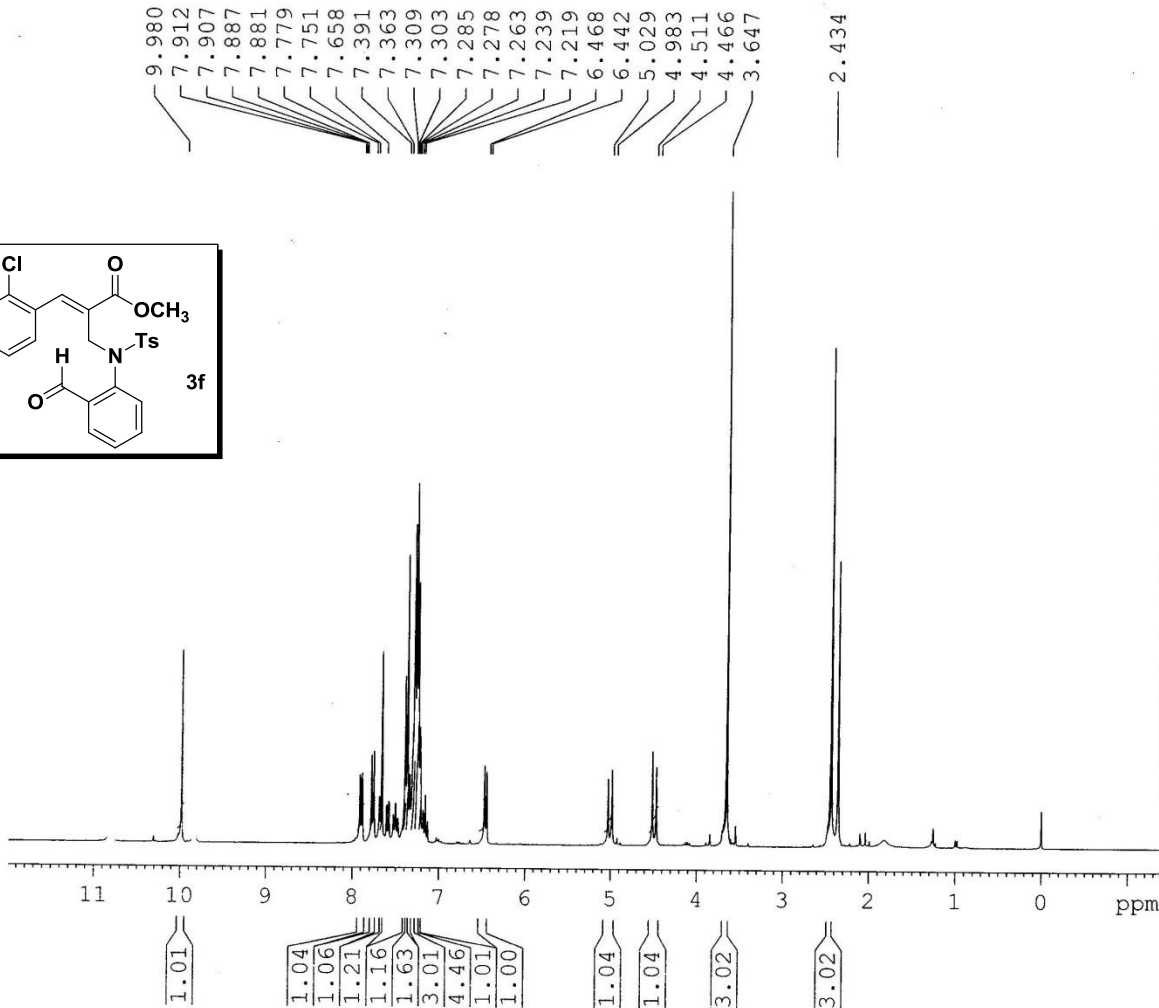

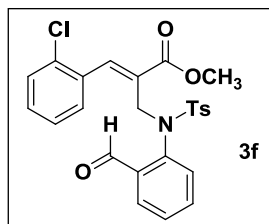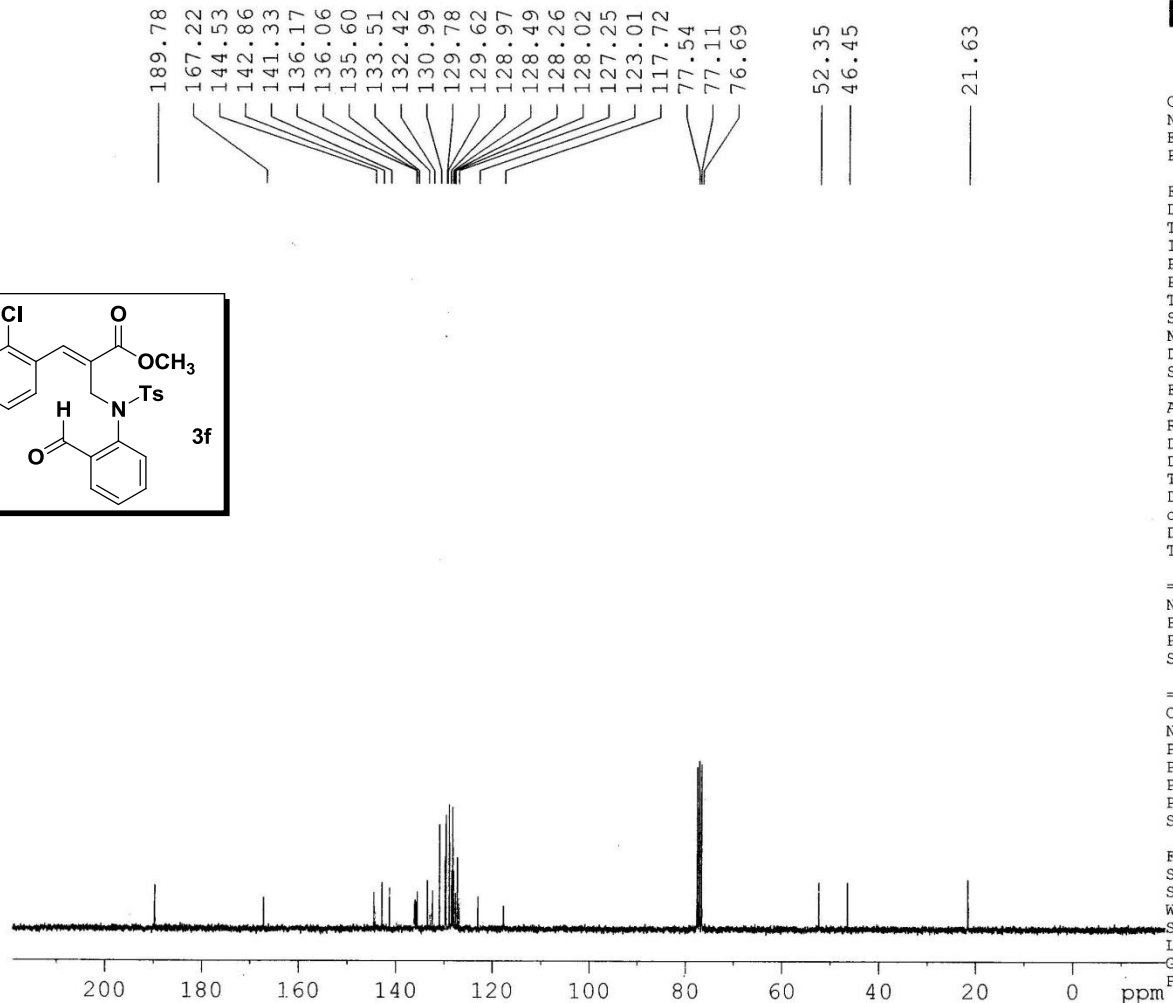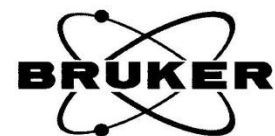

Current Data Parameters  
 NAME DK-V-2-Cl-EST-CHO  
 EXPNO 3  
 PROCNO 1

F2 - Acquisition Parameters  
 Date\_ 20130303  
 Time 23.33  
 INSTRUM spect  
 PROBHD 5 mm DUL 13C-1  
 PULPROG zgpg30  
 TD 65536  
 SOLVENT CDCl3  
 NS 58  
 DS 4  
 SWH 17985.611 Hz  
 FIDRES 0.274439 Hz  
 AQ 1.8219508 sec  
 RG 912.3  
 DW 27.800 usec  
 DE 6.00 usec  
 TE 300.0 K  
 D1 2.00000000 sec  
 d11 0.03000000 sec  
 DELTA 1.89999998 sec  
 TDO 1

===== CHANNEL f1 =====  
 NUC1 13C  
 P1 9.30 usec  
 PL1 0.00 dB  
 SFO1 75.4752953 MHz

===== CHANNEL f2 =====  
 CPDPRG2 waltz16  
 NUC2 1H  
 PCPD2 80.00 usec  
 PL2 0.00 dB  
 PL12 15.68 dB  
 PL13 16.00 dB  
 SFO2 300.1312005 MHz

F2 - Processing parameters  
 SI 32768  
 SF 75.4677490 MHz  
 WDW EM  
 SSB 0  
 LB 1.00 Hz  
 GB 0  
 PC 1.40



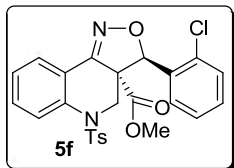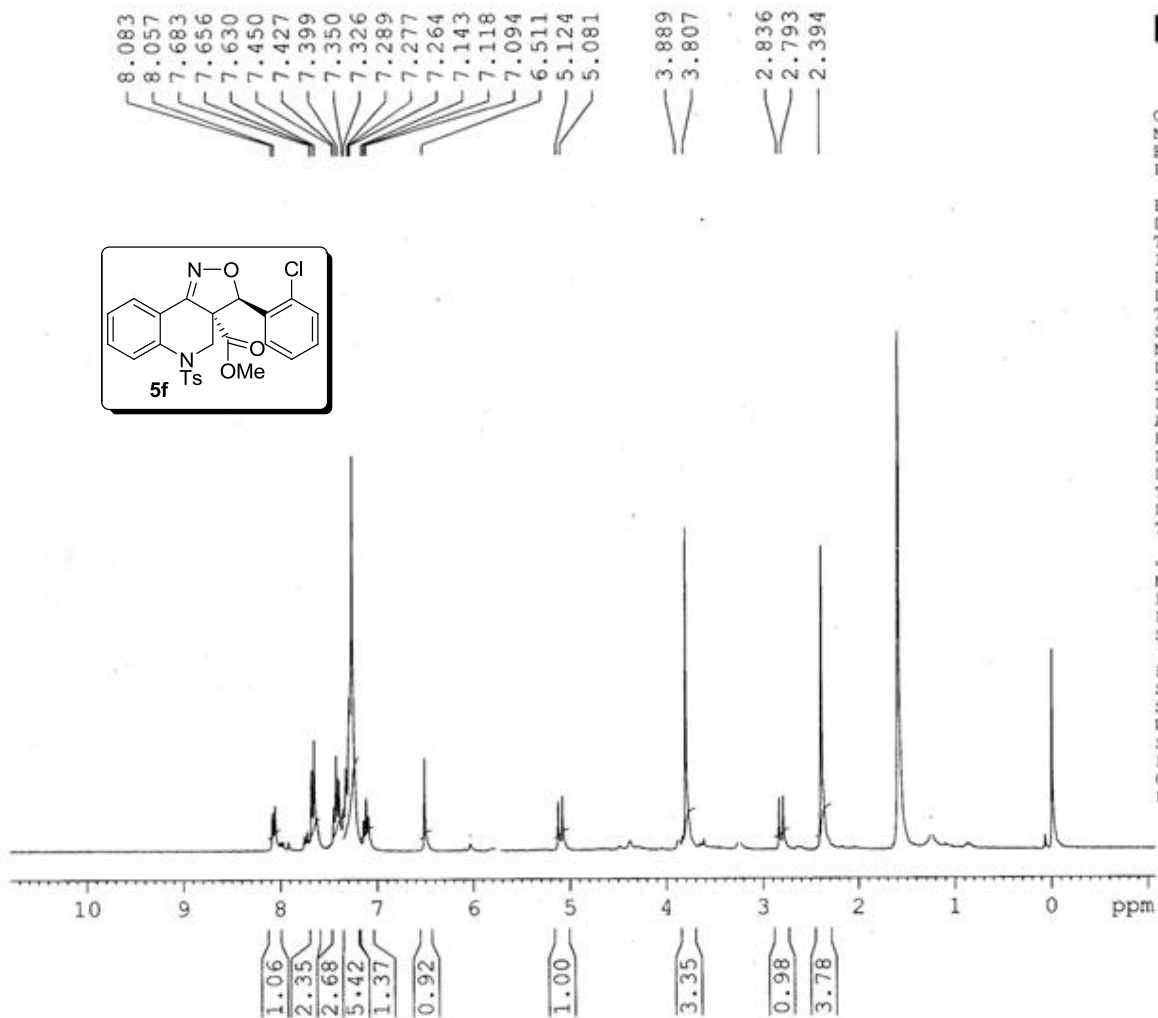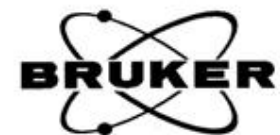

Current Data Parameters  
 NAME VV-33F  
 EXPNO 1  
 PROCNO 1

F2 - Acquisition Parameters  
 Date\_ 20120904  
 Time\_ 13.18  
 INSTRUM spect  
 PROBHD 5 mm DUL 13C-1  
 PULPROG zg30  
 TD 65536  
 SOLVENT CDCl3  
 NS 16  
 DS 2  
 SWH 6172.839 Hz  
 FIDRES 0.094190 Hz  
 AQ 5.3084660 sec  
 RG 456.1  
 DW 81.000 usec  
 DE 6.00 usec  
 TE 300.0 K  
 D1 1.00000000 sec  
 TD0 1

----- CHANNEL f1 -----  
 NUC1 1H  
 P1 13.15 usec  
 PL1 0.00 dB  
 SF01 300.1318534 MHz

F2 - Processing parameters  
 SI 32768  
 SF 300.1300063 MHz  
 WDW EM  
 SSB 0  
 LB 0.30 Hz  
 GB 0  
 PC 1.00

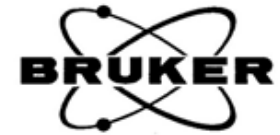

Current Data Parameters  
NAME VV-33F  
EXPNO 1  
PROCNO 1

F2 - Acquisition Parameters  
Date\_ 20121204  
Time 22.08  
INSTRUM spect  
PROBHD 5 mm DUL 13C-1  
PULPROG zgpg30  
TD 65536  
SOLVENT CDC13  
NS 1024  
DS 4  
SWH 17985.611 Hz  
FIDRES 0.274439 Hz  
AQ 1.8219508 sec  
RG 512  
DW 27.800 usec  
DE 6.00 usec  
TE 300.0 K  
D1 2.00000000 sec  
d11 0.03000000 sec  
DELTA 1.89999998 sec  
TDO 1

===== CHANNEL f1 =====  
NUC1 13C  
P1 9.30 usec  
PL1 0.00 dB  
SFO1 75.4752953 MHz

===== CHANNEL f2 =====  
CPDPRG2 waltz16  
NUC2 1H  
PCPD2 80.00 usec  
PL2 0.00 dB  
PL12 15.68 dB  
PL13 16.00 dB  
SFO2 300.1312005 MHz

F2 - Processing parameters  
SI 32768  
SF 75.4677490 MHz  
WDW EM  
SSB 0  
LB 1.00 Hz  
GB 0  
PC 1.40

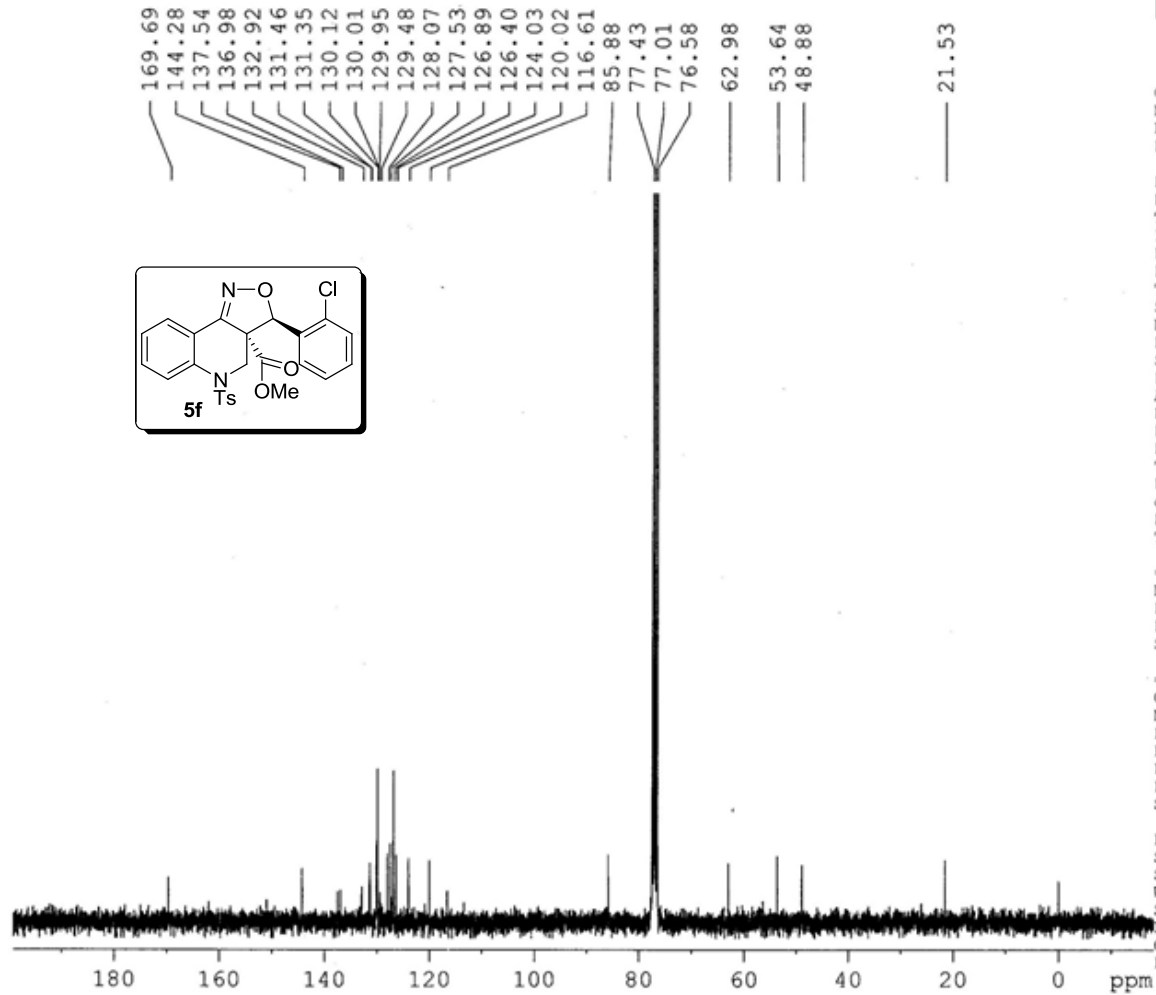

|               |          |             |                      |                 |                 |                        |                     |
|---------------|----------|-------------|----------------------|-----------------|-----------------|------------------------|---------------------|
| Sample Name   | MM-33F   | Position    |                      | Instrument Name | Q-TOF           | User Name              | QTOF-PU\admin       |
| Inj Vol       | -1       | InjPosition |                      | SampleType      | Sample          | IRM Calibration Status | Success             |
| Data Filename | MM-33F.d | ACQ Method  | Pondicherry Universi | Comment         | MSK-MB-496.0859 | Acquired Time          | 05-06-2015 13:06:04 |

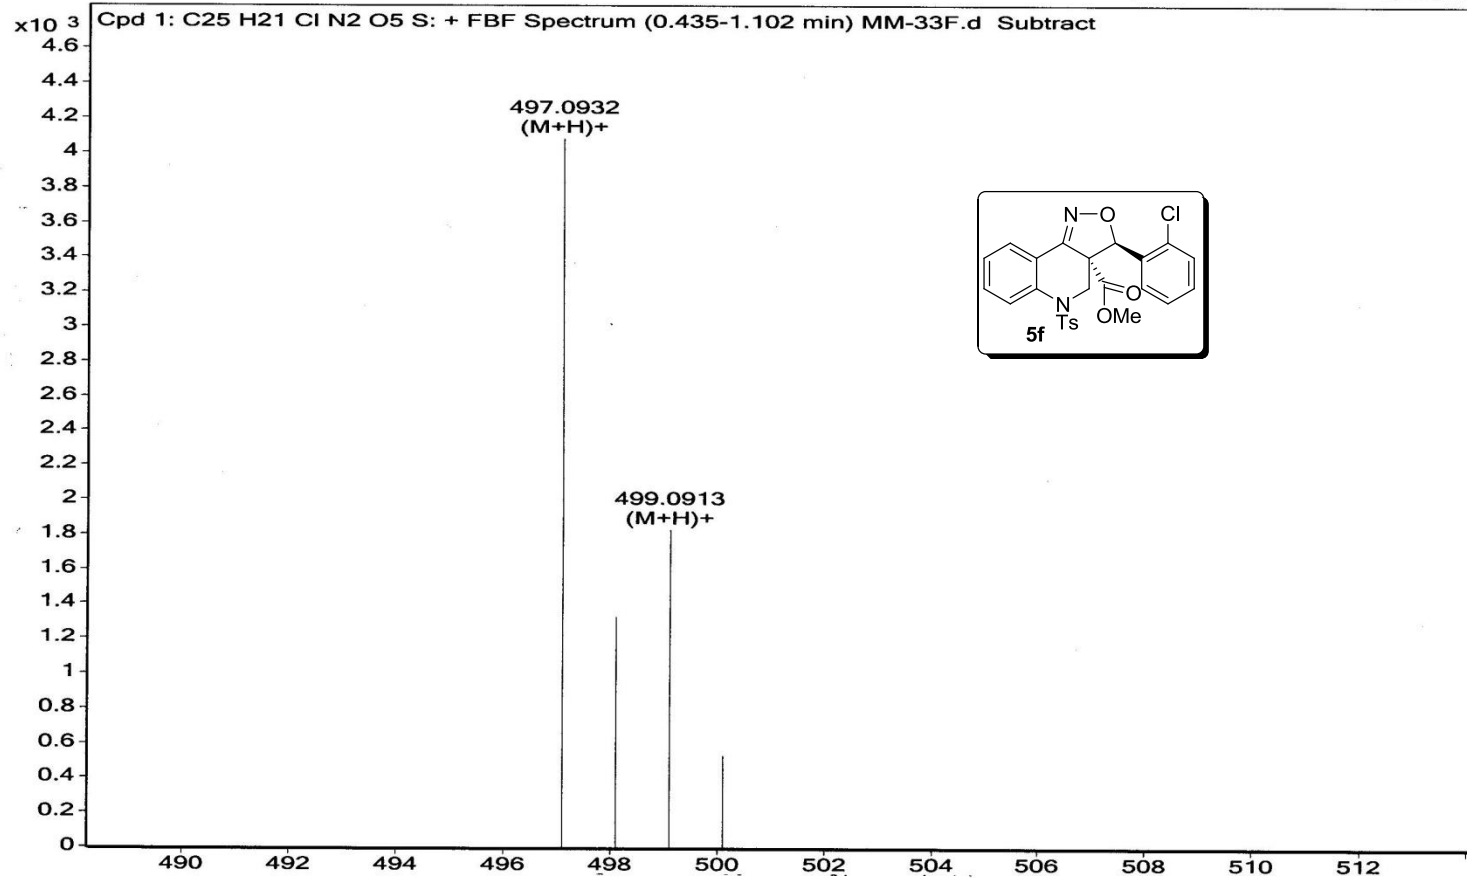

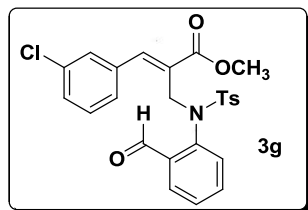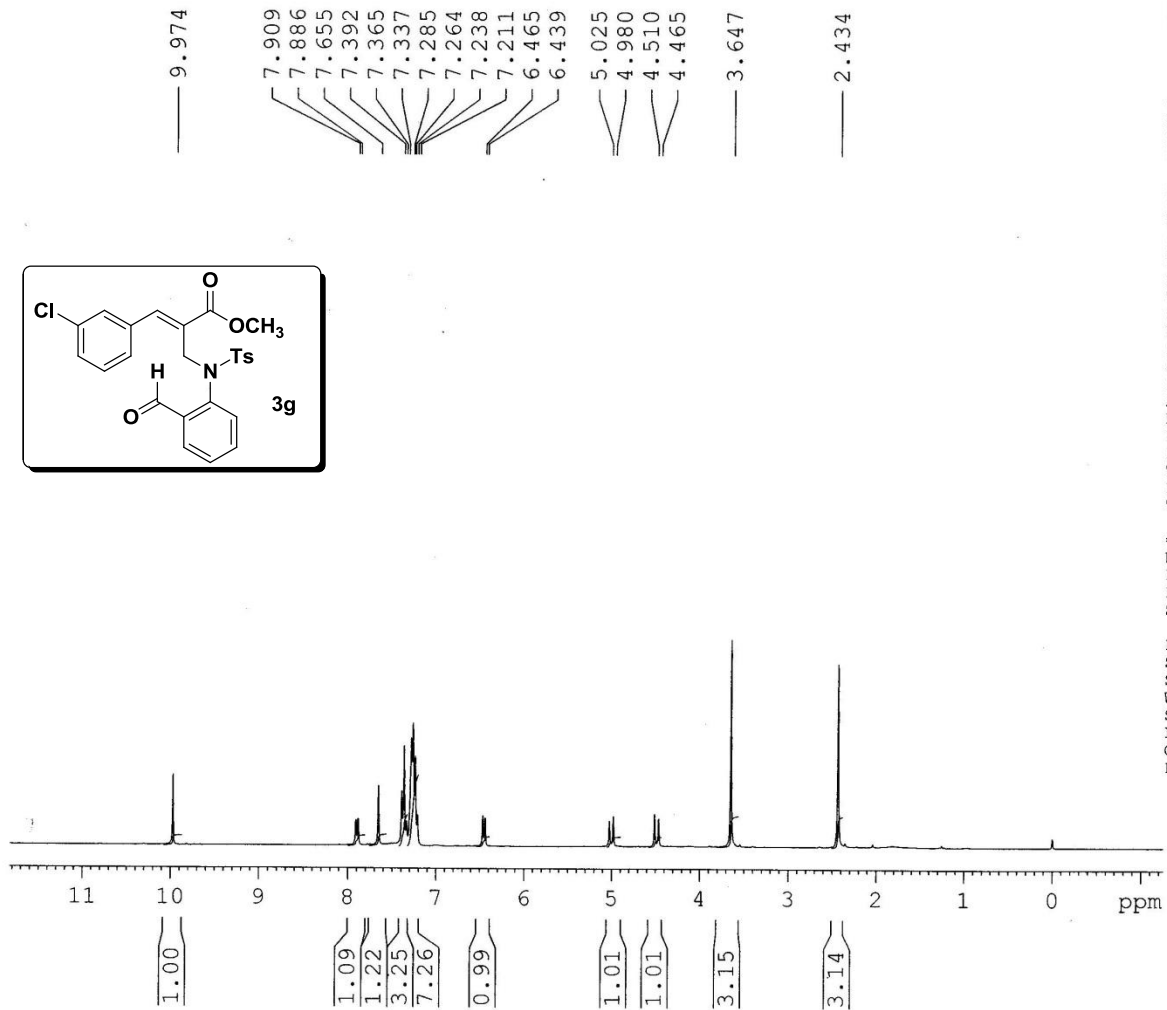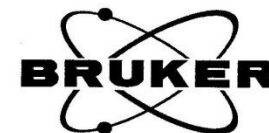

Current Data Parameters  
 NAME DK-V-3-Cl-EST-TS-CHO  
 EXPNO 1  
 PROCNO 1

F2 - Acquisition Parameters  
 Date\_ 20130305  
 Time 22.46  
 INSTRUM spect  
 PROBHD 5 mm DUL 13C-1  
 PULPROG zg30  
 TD 65536  
 SOLVENT CDCl3  
 NS 16  
 DS 2  
 SWH 6172.839 Hz  
 FIDRES 0.094190 Hz  
 AQ 5.3084660 sec  
 RG 57  
 DW 81.000 usec  
 DE 6.00 usec  
 TE 300.0 K  
 D1 1.00000000 sec  
 TD0 1

===== CHANNEL f1 =====  
 NUC1 1H  
 P1 13.15 usec  
 PL1 0.00 dB  
 SFO1 300.1318534 MHz

F2 - Processing parameters  
 SI 32768  
 SF 300.1300016 MHz  
 WDW EM  
 SSB 0  
 LB 0.30 Hz  
 GB 0  
 PC 1.00

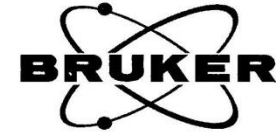

Current Data Parameters  
NAME DK-V-3-C1-EST-TS-CHO  
EXPNO 2  
PROCNO 1

F2 - Acquisition Parameters  
Date\_ 20130305  
Time\_ 22.52  
INSTRUM spect  
PROBHD 5 mm DUL 13C-1  
PULPROG zgpg30  
TD 65536  
SOLVENT CDCl3  
NS 93  
DS 4  
SWH 17985.611 Hz  
FIDRES 0.274439 Hz  
AQ 1.8219508 sec  
RG 724.1  
DW 27.800 usec  
DE 6.00 usec  
TE 300.0 K  
D1 2.00000000 sec  
d11 0.03000000 sec  
DELTA 1.89999998 sec  
TDO 1

===== CHANNEL f1 =====  
NUC1 13C  
P1 9.30 usec  
PL1 0.00 dB  
SFO1 75.4752953 MHz

===== CHANNEL f2 =====  
CPDPRG2 waltz16  
NUC2 1H  
PCPD2 80.00 usec  
PL2 0.00 dB  
PL12 15.68 dB  
PL13 16.00 dB  
SFO2 300.1312005 MHz

F2 - Processing parameters  
SI 32768  
SF 75.4677490 MHz  
WDW EM  
SSB 0  
LB 1.00 Hz  
GB 0  
PC 1.40

189.76  
167.22  
144.52  
142.87  
141.32  
136.07  
135.61  
133.50  
132.93  
132.41  
130.98  
129.62  
128.97  
128.49  
128.26  
128.02  
127.67  
126.93  
77.53  
77.10  
76.68  
52.34  
46.44  
21.63

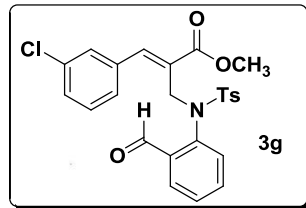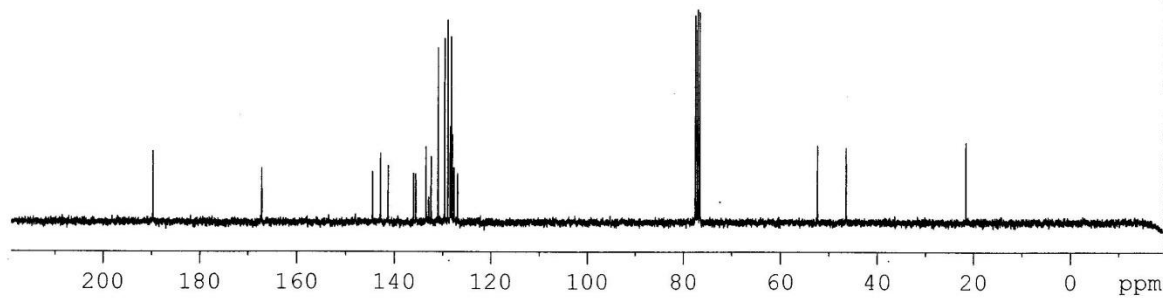

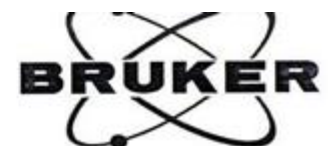

Current Data Parameters  
NAME VV-33A-F  
EXPNO 1  
PROCNO 1

F2 - Acquisition Parameters  
Date\_ 20121106  
Time\_ 23.27  
INSTRUM spect  
PROBHD 5 mm DUL 13C-1  
PULPROG zg30  
TD 65536  
SOLVENT CDCl3  
NS 7  
DS 2  
SWH 6172.839 Hz  
FIDRES 0.094190 Hz  
AQ 5.3084660 sec  
RG 101.6  
DW 81.000 use  
DE 6.00 use  
TE 300.0 K  
D1 1.00000000 sec  
TD0 1

===== CHANNEL f1 =====  
NUC1 1H  
P1 13.15 use  
PL1 0.00 dB  
SFO1 300.1318534 MHz

F2 - Processing parameters  
SI 32768  
SF 300.1300056 MHz  
WDW EM  
SSB 0  
LB 0.30 Hz  
GB 0  
PC 1.00

8.083  
8.058  
7.652  
7.625  
7.379  
7.353  
7.302  
7.274  
7.261  
7.231  
7.156  
7.132  
7.107  
6.094  
  
4.747  
4.704  
  
3.798  
  
2.693  
2.650  
2.399

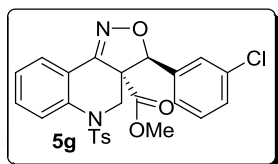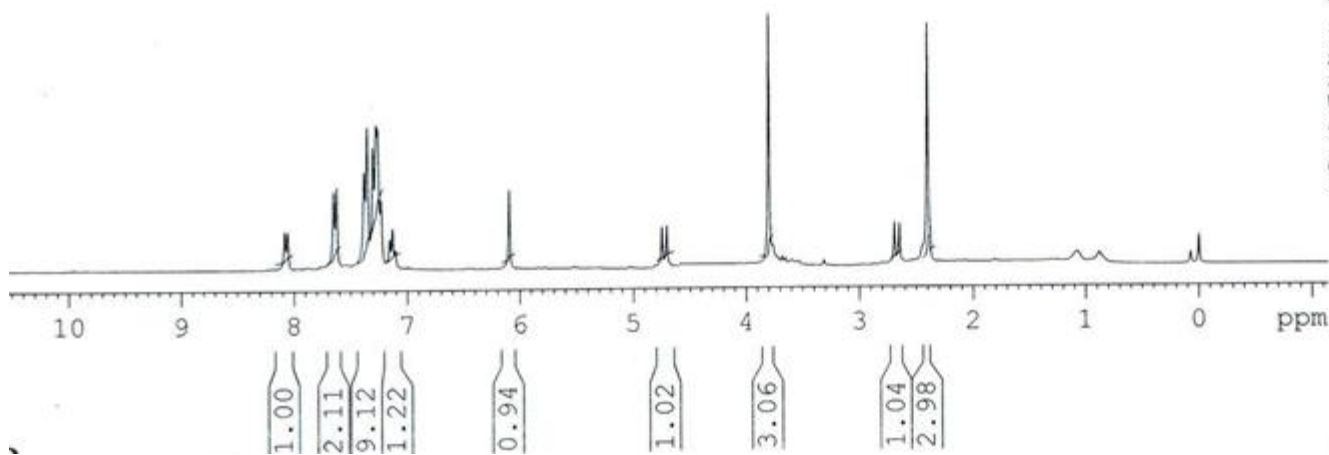

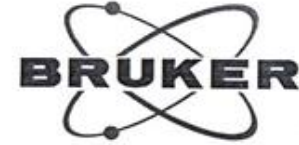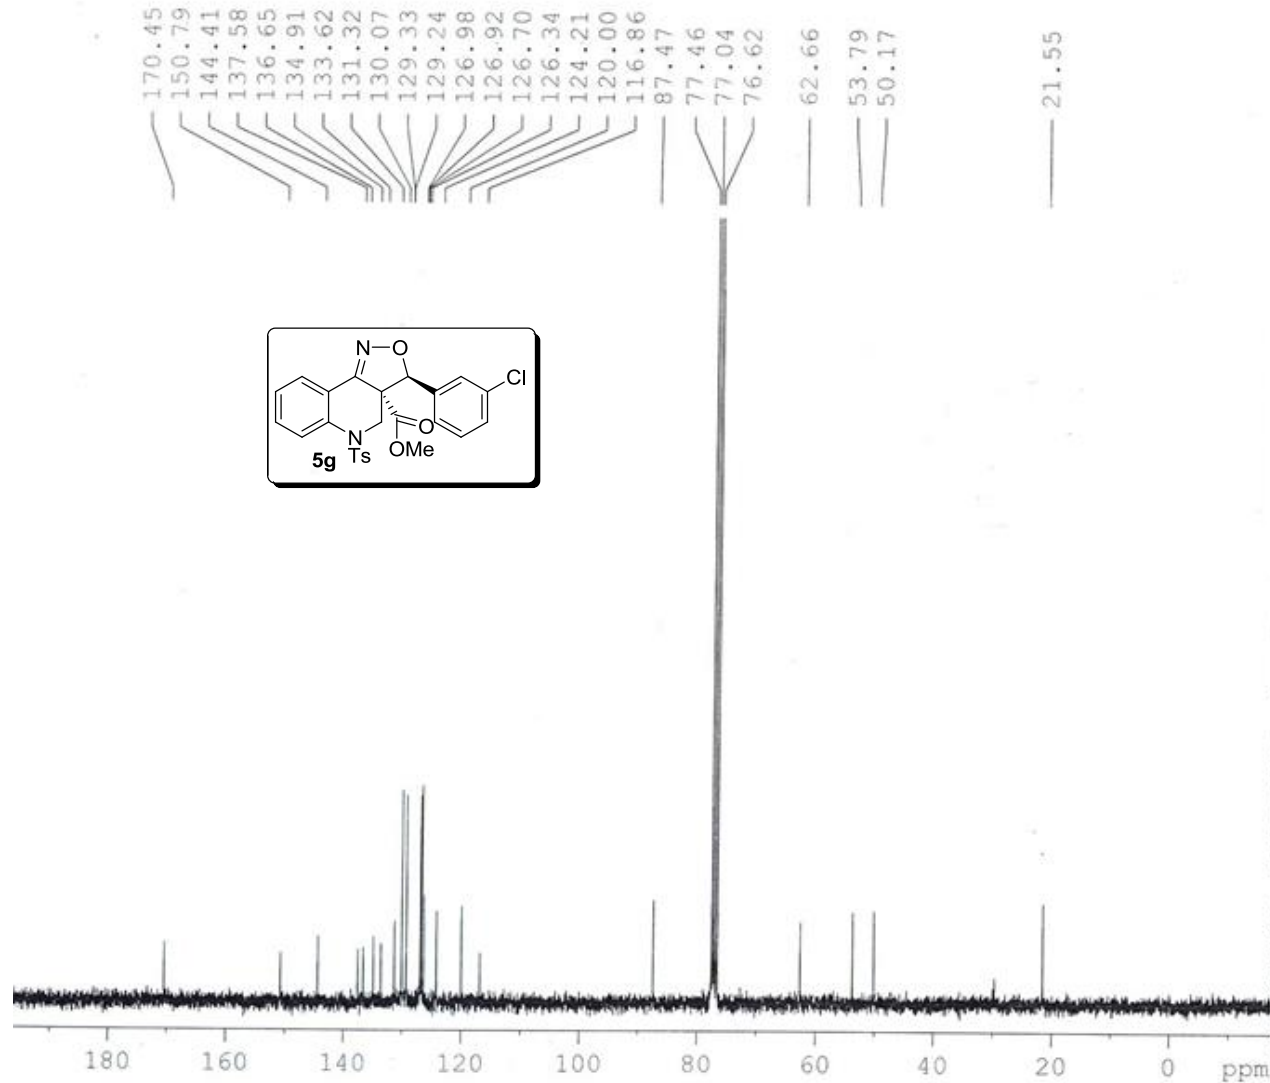

Current Data Parameters  
NAME VV-33A-F  
EXPNO 2  
PROCNO 1

F2 - Acquisition Parameters  
Date\_ 20121106  
Time\_ 23.34  
INSTRUM spect  
PROBHD 5 mm DUL 13C-1  
PULPROG zgpg30  
TD 65536  
SOLVENT CDC13  
NS 272  
DS 4  
SWH 17985.611 Hz  
FIDRES 0.274439 Hz  
AQ 1.8219508 sec  
RG 3649.1  
DW 27.800 usec  
DE 6.00 usec  
TE 300.0 K  
D1 2.00000000 sec  
d11 0.03000000 sec  
DELTA 1.89999998 sec  
TD0 1

==== CHANNEL f1 =====  
NUC1 13C  
P1 9.30 usec  
PL1 0.00 dB  
SFO1 75.4752953 MHz

==== CHANNEL f2 =====  
CPDPRG2 waltz16  
NUC2 1H  
PCPD2 80.00 usec  
PL2 0.00 dB  
PL12 15.68 dB  
PL13 16.00 dB  
SFO2 300.1312005 MHz

F2 - Processing parameters  
SI 32768  
SF 75.4677490 MHz  
WDW EM  
SSB 0  
LB 1.00 Hz  
GB 0  
PC 1.40

|               |          |             |                      |                 |                 |                        |                     |
|---------------|----------|-------------|----------------------|-----------------|-----------------|------------------------|---------------------|
| Sample Name   | MM-33A   | Position    |                      | Instrument Name | Q-TOF           | User Name              | QTOF-PU\admin       |
| Inj Vol       | -1       | InjPosition |                      | SampleType      | Sample          | IRM Calibration Status | Success             |
| Data Filename | MM-33A.d | ACQ Method  | Pondicherry Universi | Comment         | MSK-MB-496.0859 | Acquired Time          | 05-06-2015 13:02:28 |

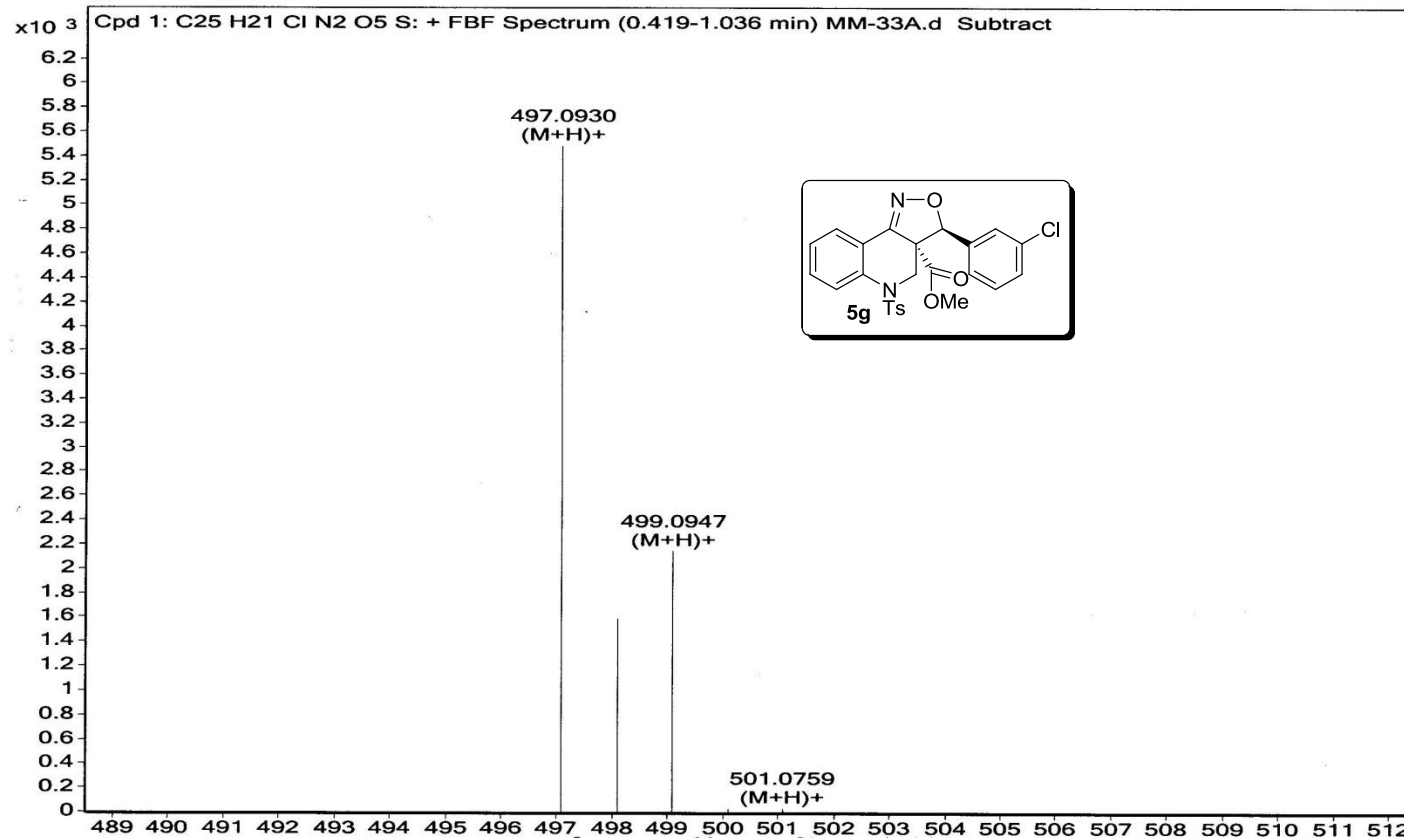



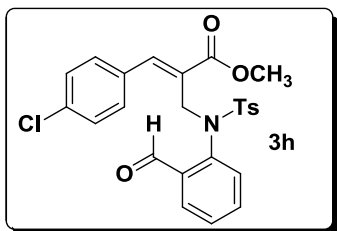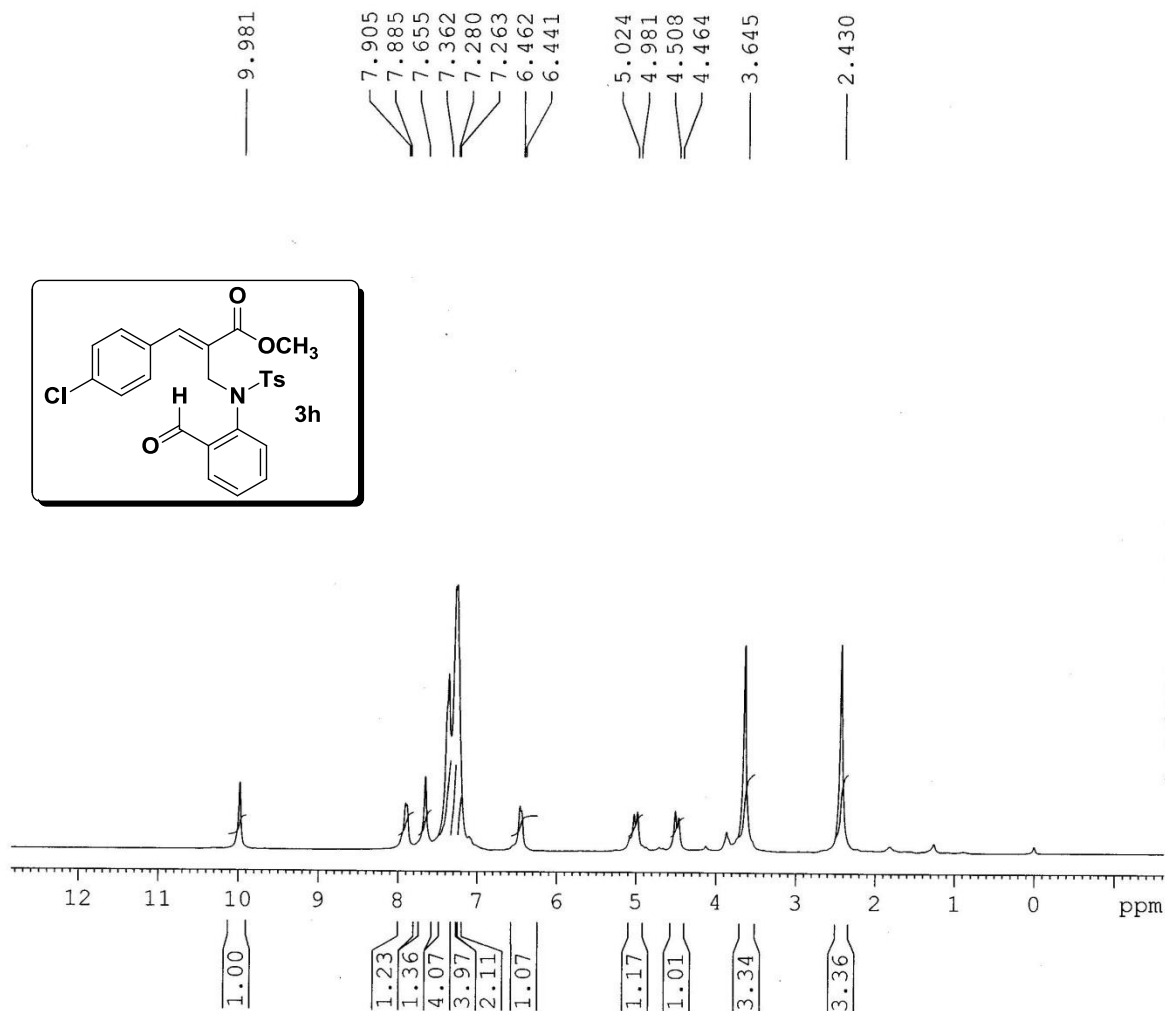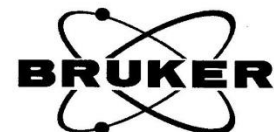

Current Data Parameters  
 NAME DK-V-4-Cl-EST-CHO  
 EXPNO 1  
 PROCNO 1

F2 - Acquisition Parameters  
 Date\_ 20130305  
 Time\_ 19.52  
 INSTRUM spect  
 PROBHD 5 mm DUL 13C-1  
 PULPROG zg30  
 TD 65536  
 SOLVENT CDC13  
 NS 16  
 DS 2  
 SWH 6172.839 Hz  
 FIDRES 0.094190 Hz  
 AQ 5.3084660 sec  
 RG 40.3  
 DW 81.000 usec  
 DE 6.00 usec  
 TE 300.0 K  
 D1 1.00000000 sec  
 TD0 1

===== CHANNEL f1 =====  
 NUC1 1H  
 P1 13.15 usec  
 PL1 0.00 dB  
 SFO1 300.1318534 MHz

F2 - Processing parameters  
 SI 32768  
 SF 300.1300015 MHz  
 WDW EM  
 SSB 0  
 LB 0.30 Hz  
 GB 0  
 PC 1.00

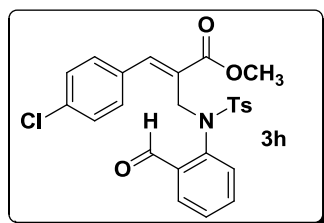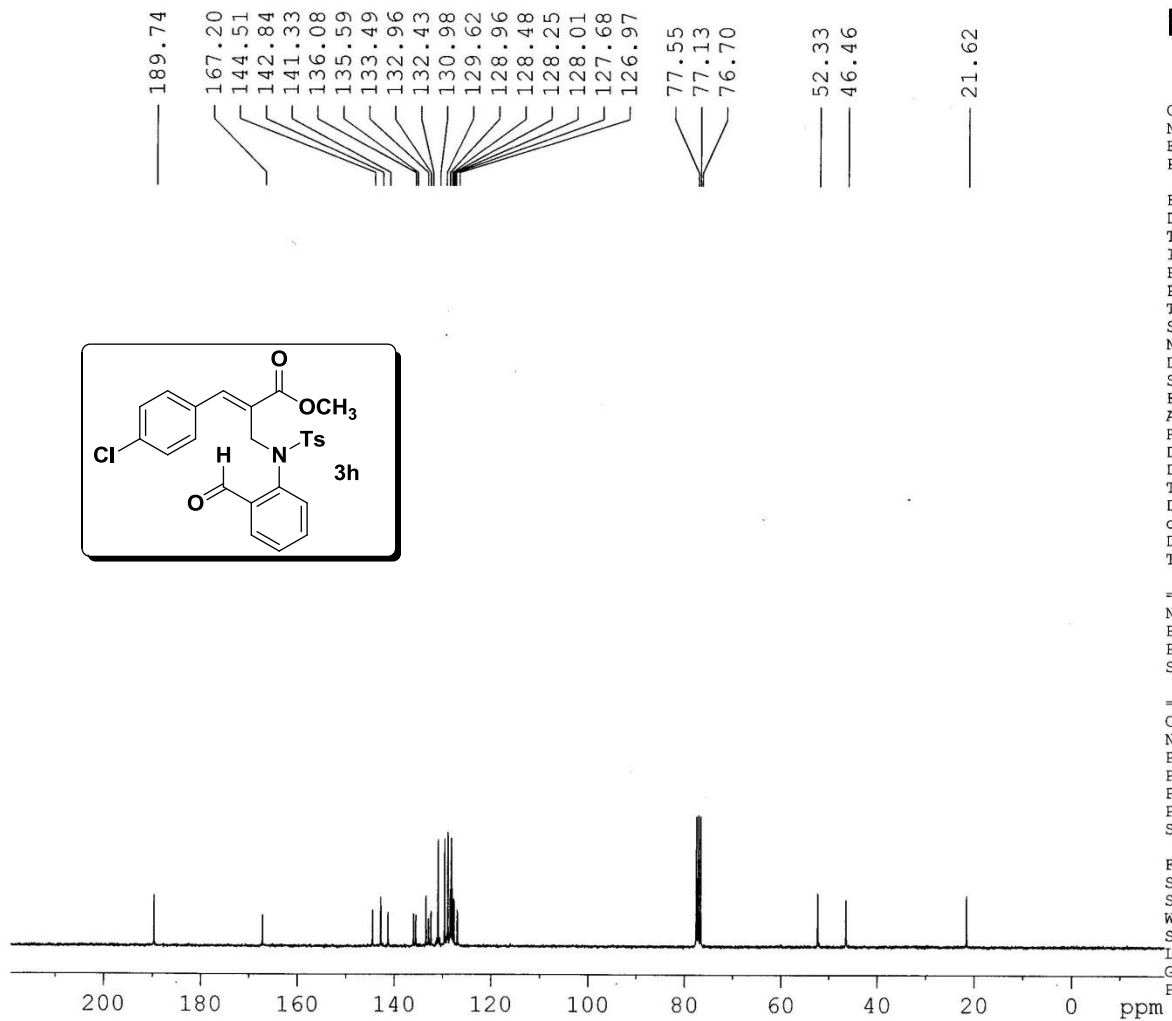

189.74  
 167.20  
 144.51  
 142.84  
 141.33  
 136.08  
 135.59  
 133.49  
 132.96  
 132.43  
 130.98  
 129.62  
 128.96  
 128.48  
 128.25  
 128.01  
 127.68  
 126.97  
 77.55  
 77.13  
 76.70  
 52.33  
 46.46  
 21.62

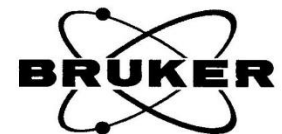

Current Data Parameters  
 NAME DK-V-4-Cl-EST-CHO  
 EXPNO 2  
 PROCNO 1

F2 - Acquisition Parameters  
 Date\_ 20130305  
 Time 20.23  
 INSTRUM spect  
 PROBHD 5 mm DUL 13C-1  
 PULPROG zgpg30  
 TD 65536  
 SOLVENT CDC13  
 NS 460  
 DS 4  
 SWH 17985.611 Hz  
 FIDRES 0.274439 Hz  
 AQ 1.8219508 sec  
 RG 1625.5  
 DW 27.800 usec  
 DE 6.00 usec  
 TE 300.0 K  
 D1 2.00000000 sec  
 d11 0.03000000 sec  
 DELTA 1.89999998 sec  
 TD0 1

===== CHANNEL f1 =====  
 NUC1 13C  
 P1 9.30 usec  
 PL1 0.00 dB  
 SFO1 75.4752953 MHz

===== CHANNEL f2 =====  
 CPDPRG2 waltz16  
 NUC2 1H  
 PCPD2 80.00 usec  
 PL2 0.00 dB  
 PL12 15.68 dB  
 PL13 16.00 dB  
 SFO2 300.1312005 MHz

F2 - Processing parameters  
 SI 32768  
 SF 75.4677490 MHz  
 WDW EM  
 SSB 0  
 LB 1.00 Hz  
 GB 0  
 PC 1.40

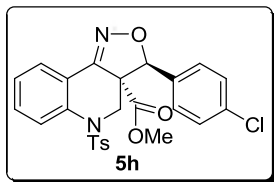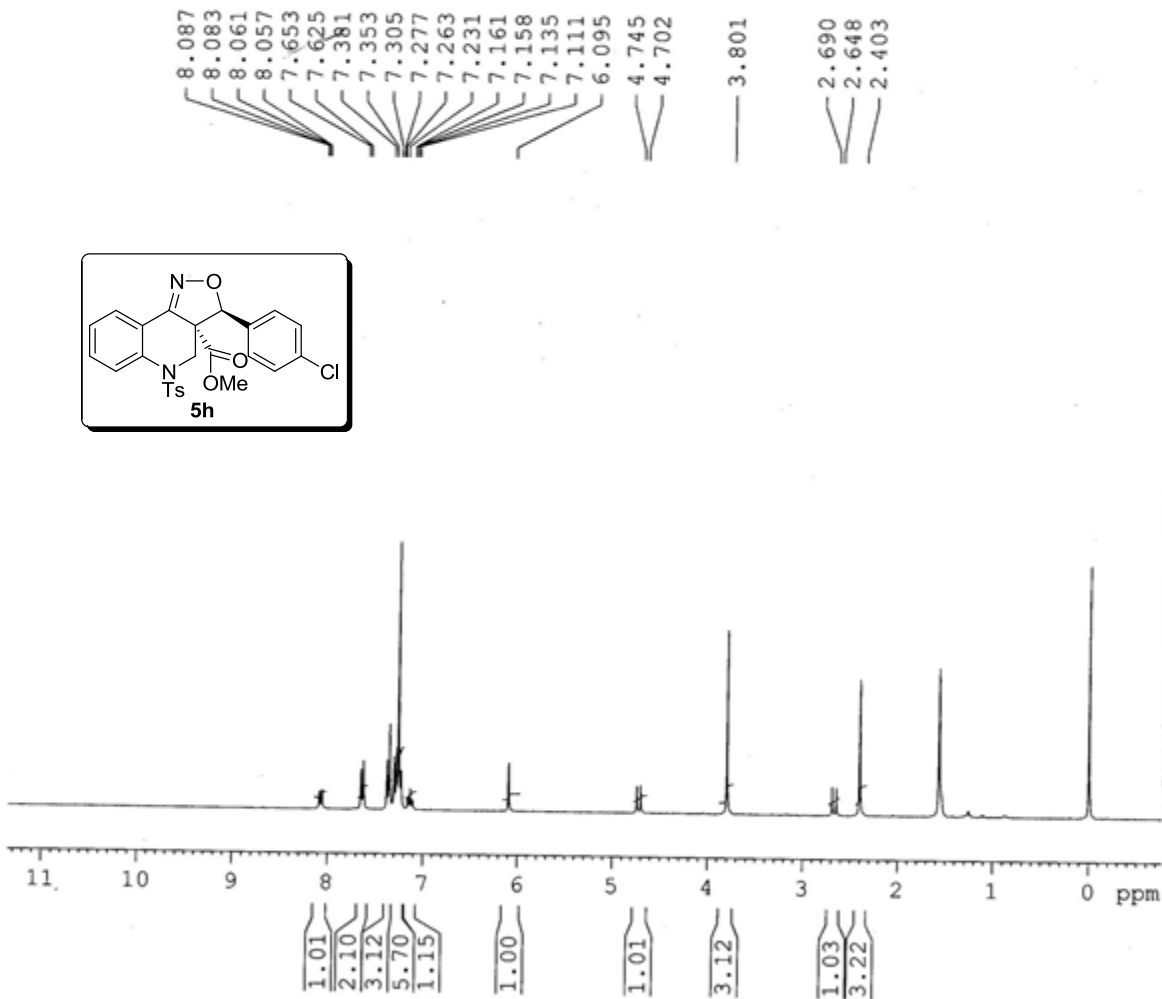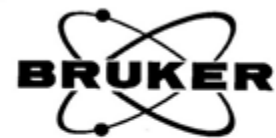

Current Data Parameters  
 NAME VV-54F  
 EXPNO 1  
 PROCNO 1

F2 - Acquisition Parameters  
 Date\_ 20121018  
 Time 19.09  
 INSTRUM spect  
 PROBHD 5 mm DUL 13C-1  
 PULPROG zg30  
 TD 65536  
 SOLVENT CDCl3  
 NS 16  
 DS 2  
 SWH 6172.839 Hz  
 FIDRES 0.094190 Hz  
 AQ 5.3084660 sec  
 RG 512  
 DW 81.000 usec  
 DE 6.00 usec  
 TE 300.0 K  
 D1 1.00000000 sec  
 TDO 1

----- CHANNEL f1 -----  
 NUC1 1H  
 P1 13.15 usec  
 PL1 0.00 dB  
 SFO1 300.1318534 MHz

F2 - Processing parameters  
 SI 32768  
 SF 300.1300060 MHz  
 WDW EM  
 SSB 0  
 LB 0.30 Hz  
 GB 0  
 PC 1.00

UNIV. OF MADRAS

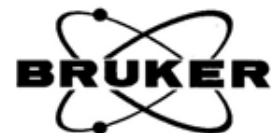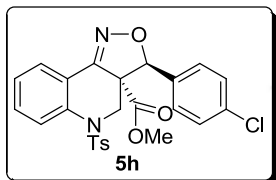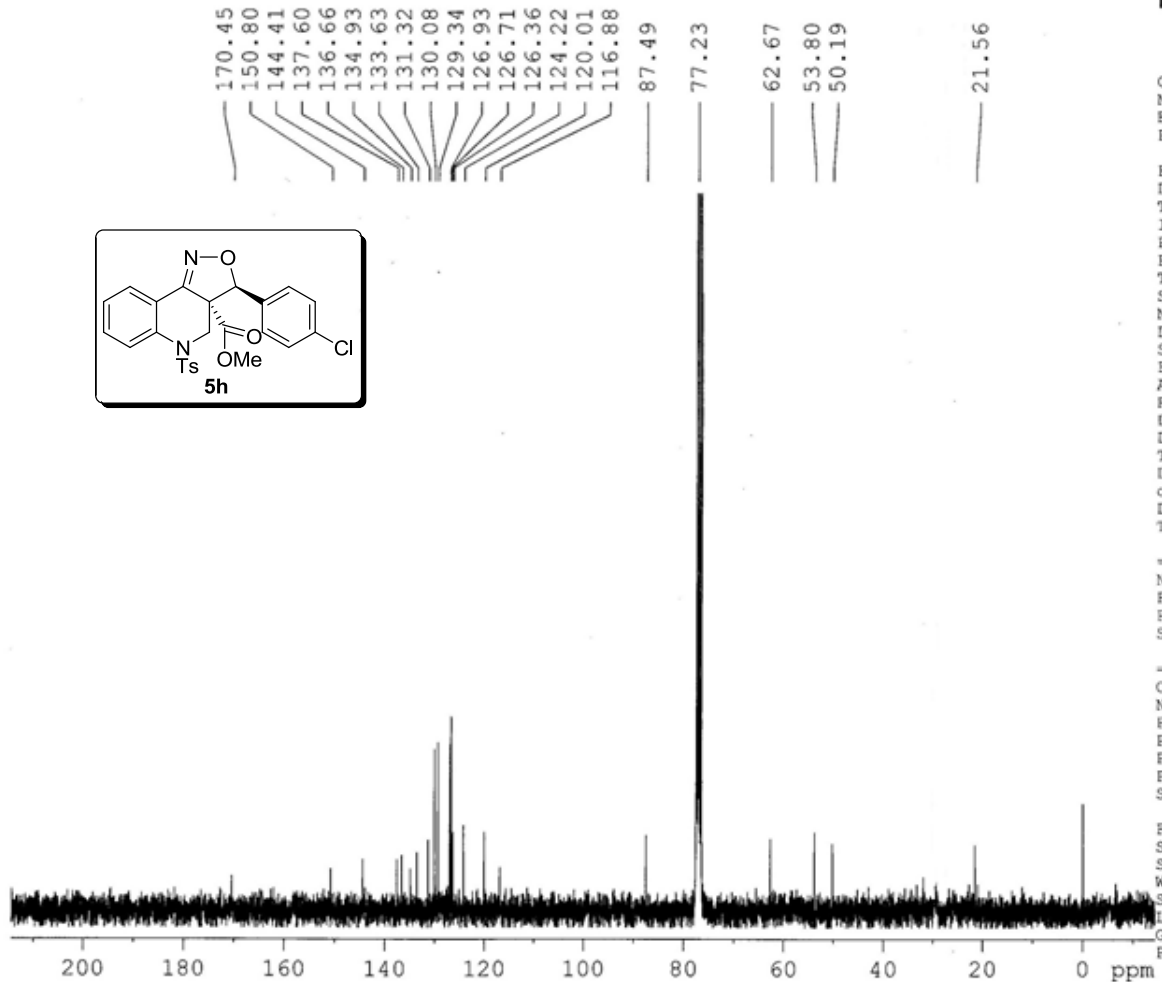

Current Data Parameters  
NAME VV-54F  
EXPNO 1  
PROCNO 1

F2 - Acquisition Parameters  
Date\_ 20150422  
Time 12.32  
INSTRUM spect  
PROBHD 5 mm DUL 13C-1  
PULPROG zgpg30  
TD 65536  
SOLVENT CDC13  
NS 2310  
DS 4  
SWH 17985.611 Hz  
FIDRES 0.274439 Hz  
AQ 1.8219508 sec  
RG 3251  
DW 27.800 usec  
DE 6.00 usec  
TE 300.0 K  
D1 2.00000000 sec  
d11 0.03000000 sec  
DELTA 1.89999998 sec  
TDO 1

===== CHANNEL f1 =====  
NUC1 13C  
P1 9.30 usec  
PL1 0.00 dB  
SFO1 75.4752953 MHz

===== CHANNEL f2 =====  
CPDPRG2 waltz16  
NUC2 1H  
PCPD2 80.00 usec  
PL2 0.00 dB  
PL12 15.68 dB  
PL13 16.00 dB  
SFO2 300.1312005 MHz

F2 - Processing parameters  
SI 32768  
SF 75.4677482 MHz  
WDW EM  
SSB 0  
LB 1.00 Hz  
GB 0  
PC 1.40

|               |          |             |                      |                 |                 |                        |                     |
|---------------|----------|-------------|----------------------|-----------------|-----------------|------------------------|---------------------|
| Sample Name   | MM-54F   | Position    |                      | Instrument Name | Q-TOF           | User Name              | QTOF-PU\admin       |
| Inj Vol       | -1       | InjPosition |                      | SampleType      | Sample          | IRM Calibration Status | Success             |
| Data Filename | MM-54F.d | ACQ Method  | Pondicherry Universi | Comment         | MSK-MB-496.0859 | Acquired Time          | 05-06-2015 14:49:27 |

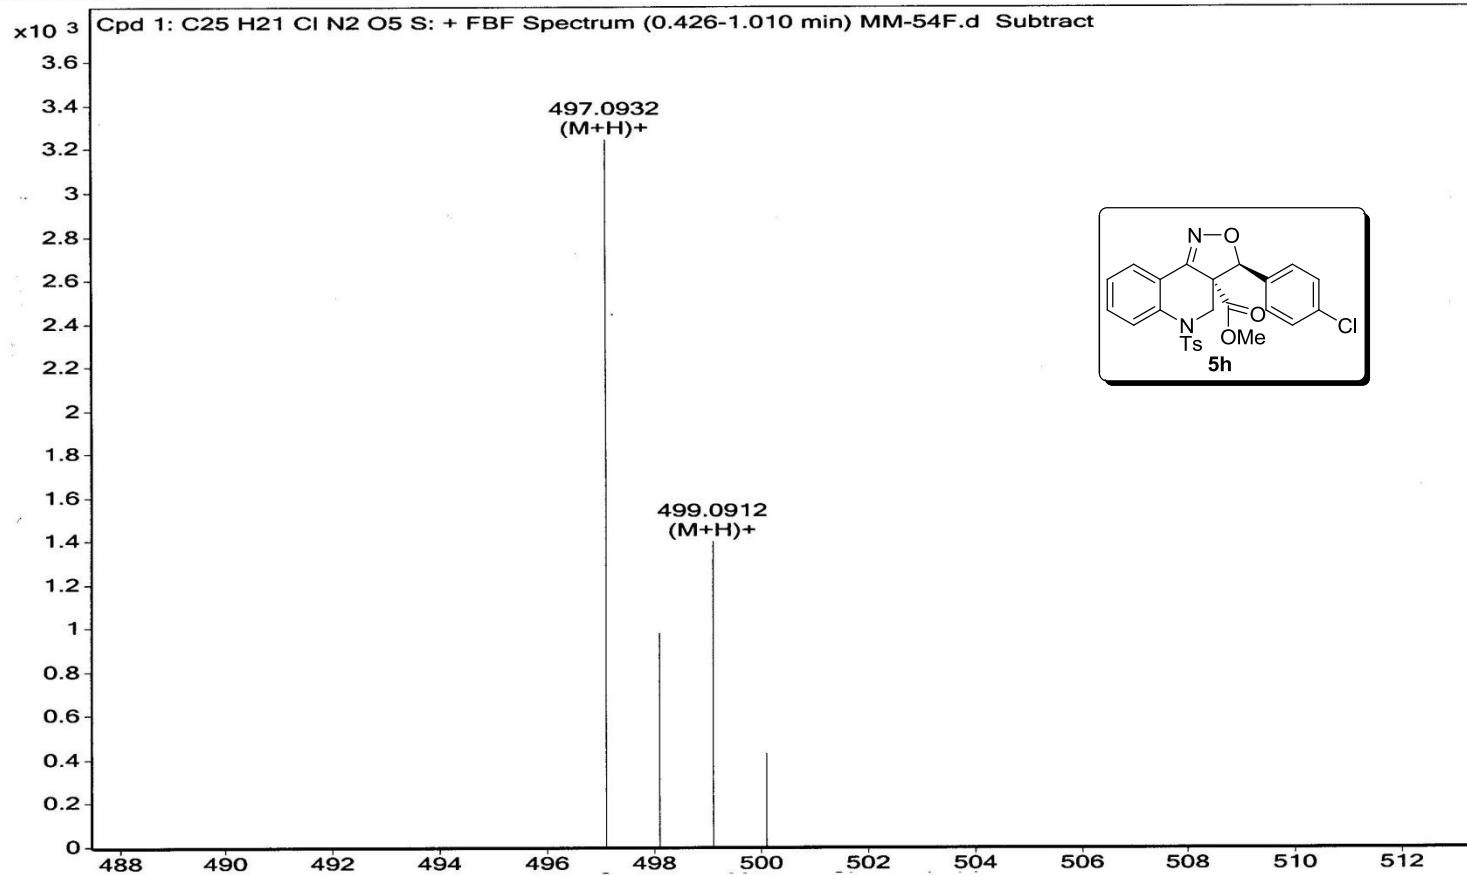

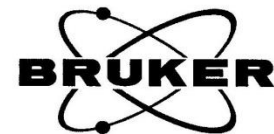

Current Data Parameters  
NAME VV-52  
EXPNO 1  
PROCNO 1

F2 - Acquisition Parameters  
Date\_ 20121204  
Time 23.13  
INSTRUM spect  
PROBHD 5 mm DUL 13C-1  
PULPROG zg30  
TD 65536  
SOLVENT CDCl3  
NS 16  
DS 2  
SWH 6172.839 Hz  
FIDRES 0.094190 Hz  
AQ 5.3084660 sec  
RG 287.4  
DW 81.000 usec  
DE 6.00 usec  
TE 300.0 K  
D1 1.00000000 sec  
TD0 1

===== CHANNEL f1 =====  
NUC1 1H  
P1 13.15 usec  
PL1 0.00 dB  
SFO1 300.1318534 MHz

F2 - Processing parameters  
SI 32768  
SF 300.1300049 MHz  
WDW EM  
SSB 0  
LB 0.30 Hz  
GB 0  
PC 1.00

10.020  
7.951  
7.946  
7.926  
7.921  
7.663  
7.421  
7.397  
7.392  
7.371  
7.324  
7.304  
7.299  
7.275  
7.266  
7.247  
7.219  
7.191  
7.181  
7.153  
6.391  
6.364  
4.913  
4.867  
4.368  
4.323  
3.725  
2.428

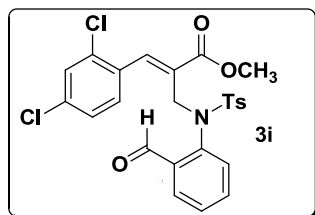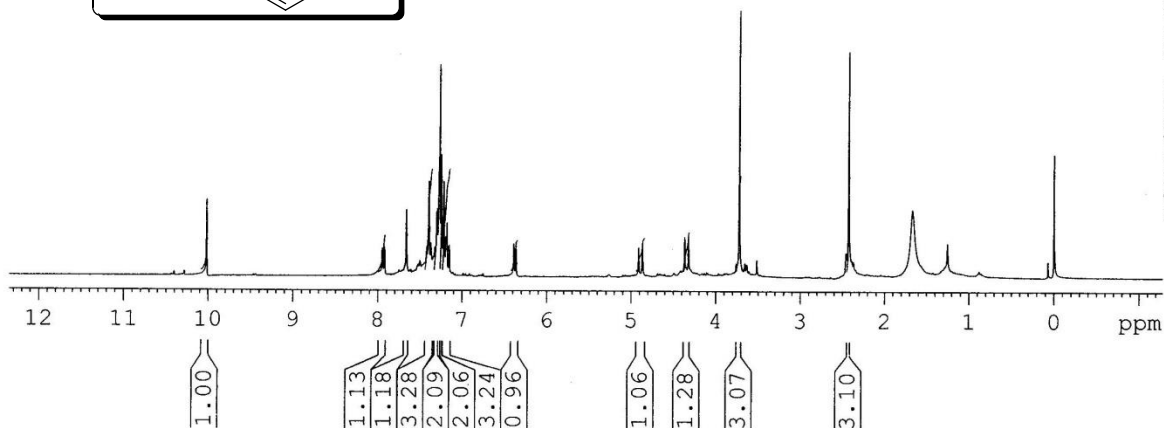

195.04  
189.69

144.19  
141.38  
139.68  
136.13  
135.80  
134.93  
133.68  
131.10  
130.11  
129.76  
129.58  
128.56  
128.25  
128.13  
127.25  
127.04  
122.96  
117.73

52.50  
46.77

21.61

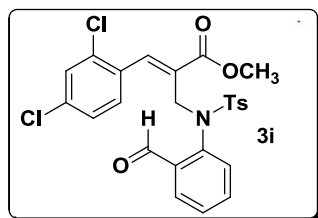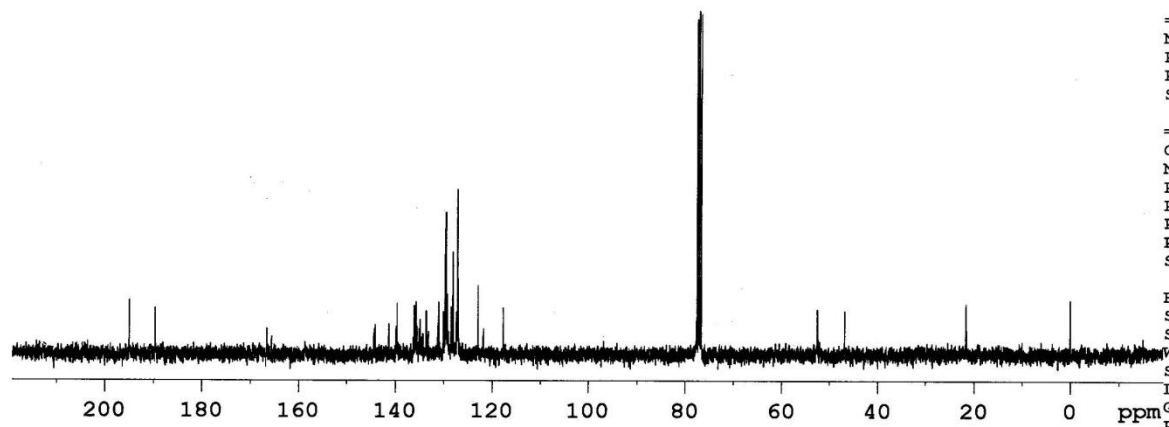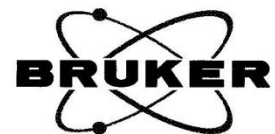

Current Data Parameters  
NAME VV-237  
EXENO 1  
PROCNO 1

F2 - Acquisition Parameters  
Date 20150622  
Time 20.26  
INSTRUM spect  
PROBHD 5 mm DUL 13C-1  
PULPROG zgpg30  
TD 65536  
SOLVENT CDCl3  
NS 78  
DS 4  
SWH 17985.611 Hz  
FIDRES 0.274439 Hz  
AQ 1.8219508 sec  
RG 20642.5  
DW 27.800 usec  
DE 6.00 usec  
TE 300.0 K  
D1 2.00000000 sec  
d11 0.03000000 sec  
DELTA 1.89999998 sec  
TDO 1

CHANNEL f1  
NUC1 13C  
P1 10.38 usec  
PL1 0.00 dB  
SFO1 75.4752953 MHz

CHANNEL f2  
CPDPRG2 waltz16  
NUC2 1H  
PCPD2 80.00 usec  
PL2 0.00 dB  
PL12 15.21 dB  
PL13 16.00 dB  
SFO2 300.1312005 MHz

F2 - Processing parameters  
SI 32768  
SF 75.4677496 MHz  
WDW EM  
SSB 0  
LB 1.00 Hz  
GB 0  
PC 1.40

8.075  
8.070  
8.049  
8.044  
7.693  
7.665  
7.465  
7.459  
7.311  
7.283  
7.271  
7.263  
7.253  
7.152  
7.126  
7.102  
6.463  
5.088  
5.046

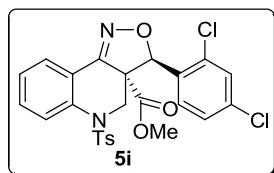

3.807  
2.841  
2.798  
2.407

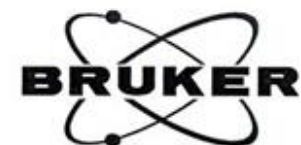

Current Data Parameters  
NAME V.V.52F  
EXPNO 1  
PROCNO 1

F2 - Acquisition Parameters  
Date 20130206  
Time 16.21  
INSTRUM spect  
PROBHD 5 mm DUL 13C-1  
PULPROG zg30  
TD 65536  
SOLVENT CDC13  
NS 11  
DS 2  
SWH 6172.839 Hz  
FIDRES 0.094190 Hz  
AQ 5.3084660 sec  
RG 322.5  
DW 81.000 usec  
DE 6.00 usec  
TE 300.0 K  
D1 1.00000000 sec  
TD0 1

===== CHANNEL f1 =====  
NUC1 1H  
P1 13.15 usec  
PL1 0.00 dB  
SFO1 300.1318534 MHz

F2 - Processing parameters  
SI 32768  
SF 300.1300058 MHz  
WDW EM  
SSB 0  
LB 0.30 Hz  
GB 0  
PC 1.00

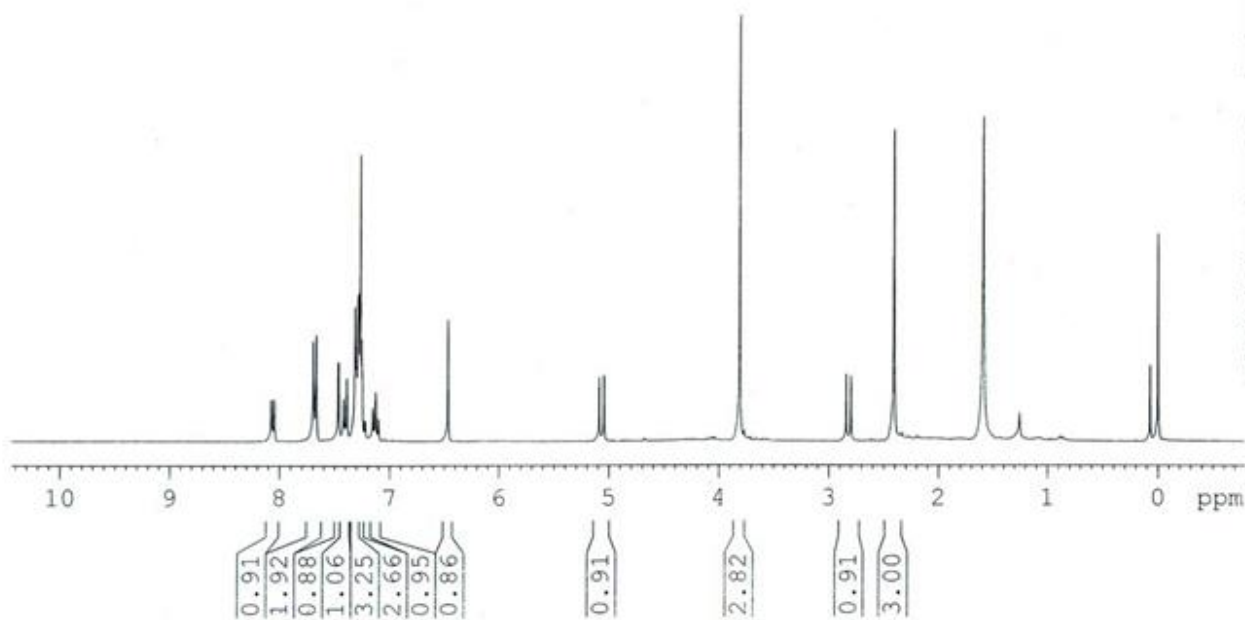



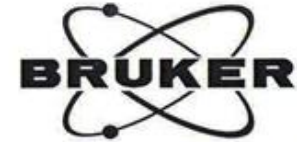

Current Data Parameters  
NAME V.V.52F  
EXPNO 2  
PROCNO 1

F2 - Acquisition Parameters  
Date\_ 20130206  
Time 16.26  
INSTRUM spect  
PROBHD 5 mm DUL 13C-1  
PULPROG zgpg30  
TD 65536  
SOLVENT CDCl3  
NS 606  
DS 4  
SWH 17985.611 Hz  
FIDRES 0.274439 Hz  
AQ 1.8219508 sec  
RG 1149.4  
DW 27.800 usec  
DE 6.00 usec  
TE 300.0 K  
D1 2.00000000 sec  
d11 0.03000000 sec  
DELTA 1.89999998 sec  
TDO 1

----- CHANNEL f1 -----  
NUC1 13C  
P1 9.30 usec  
PL1 0.00 dB  
SFO1 75.4752953 MHz

----- CHANNEL f2 -----  
CPDPRG2 waltz16  
NUC2 1H  
PCPD2 80.00 usec  
PL2 0.00 dB  
PL12 15.68 dB  
PL13 16.00 dB  
SFO2 300.1312005 MHz

F2 - Processing parameters  
SI 32768  
SF 75.4677490 MHz  
WDW EM  
SSB 0  
LB 1.00 Hz  
GB 0  
PC 1.40

169.50  
151.13  
144.38  
137.59  
137.01  
135.47  
132.16  
131.62  
131.50  
130.03  
129.84  
129.15  
127.97  
126.82  
126.38  
124.15  
120.16  
116.53  
85.43  
77.43  
77.21  
77.01  
76.59  
63.09  
53.73  
48.88  
21.55

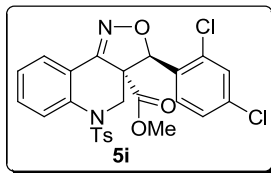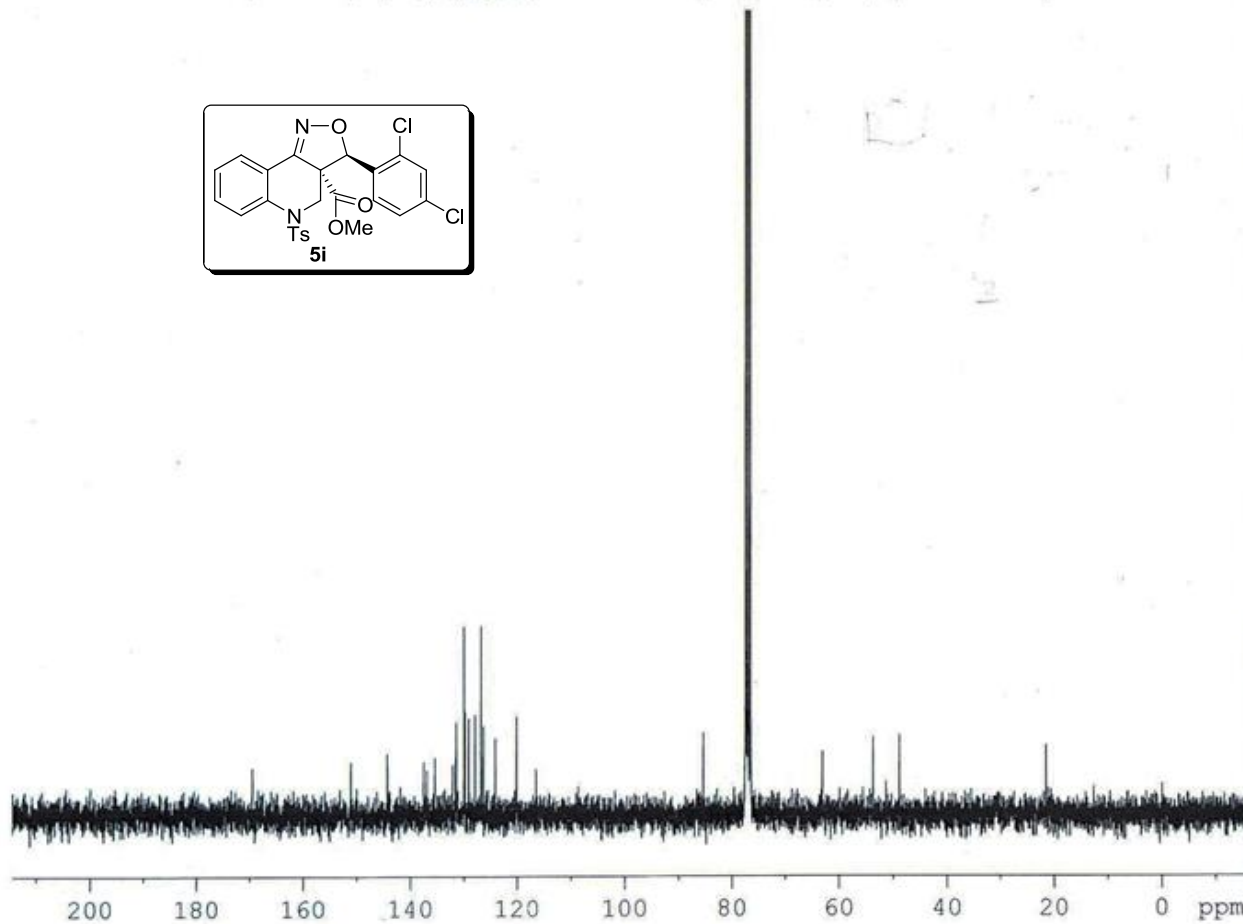

Sample Name MM-52F  
Inj Vol -1  
Data Filename MM-52F.d

Position  
InjPosition  
ACQ Method Pondicherry Universi

Instrument Name Q-TOF  
SampleType Sample  
Comment MSK-MB-530.0470

User Name  
IRM Calibration Status  
Acquired Time

QTOF-PU\admin  
Success  
05-06-2015 13:27:49

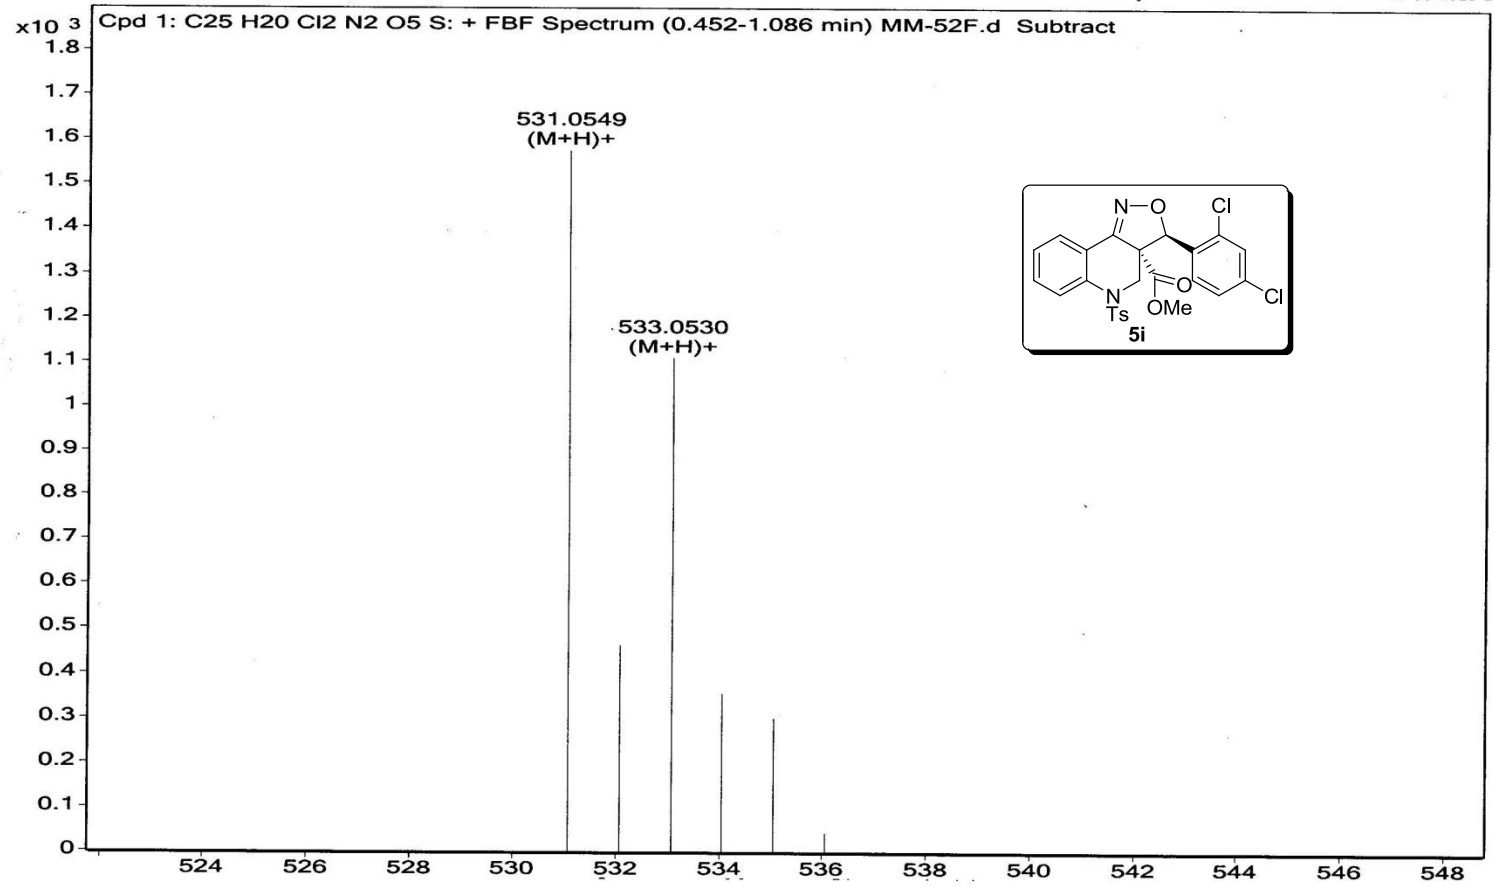

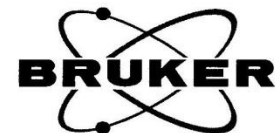

Current Data Parameters  
NAME DK-V-PIP-EST-TS-CHO  
EXPNO 1  
PROCNO 1

F2 - Acquisition Parameters  
Date\_ 20121211  
Time\_ 19.57  
INSTRUM spect  
PROBHD 5 mm DUL 13C-1  
PULPROG zg30  
TD 65536  
SOLVENT CDC13  
NS 12  
DS 2  
SWH 6172.839 Hz  
FIDRES 0.094190 Hz  
AQ 5.3084660 sec  
RG 80.6  
DW 81.000 usec  
DE 6.00 usec  
TE 300.0 K  
D1 1.00000000 sec  
TD0 1

===== CHANNEL f1 =====  
NUC1 1H  
P1 13.15 usec  
PL1 0.00 dB  
SF01 300.1318534 MHz

F2 - Processing parameters  
SI 32768  
SF 300.1300051 MHz  
WDW EM  
SSB 0  
LB 0.30 Hz  
GB 0  
PC 1.00

9.851  
7.889  
7.883  
7.864  
7.858  
7.692  
7.359  
7.332  
7.307  
7.287  
7.265  
7.259  
7.237  
7.209  
6.517  
6.491  
5.088  
5.043  
4.604  
4.560  
3.627  
3.034  
3.011  
2.988  
2.965  
2.942  
2.919  
2.896  
2.431  
1.314  
1.291

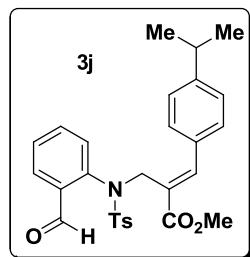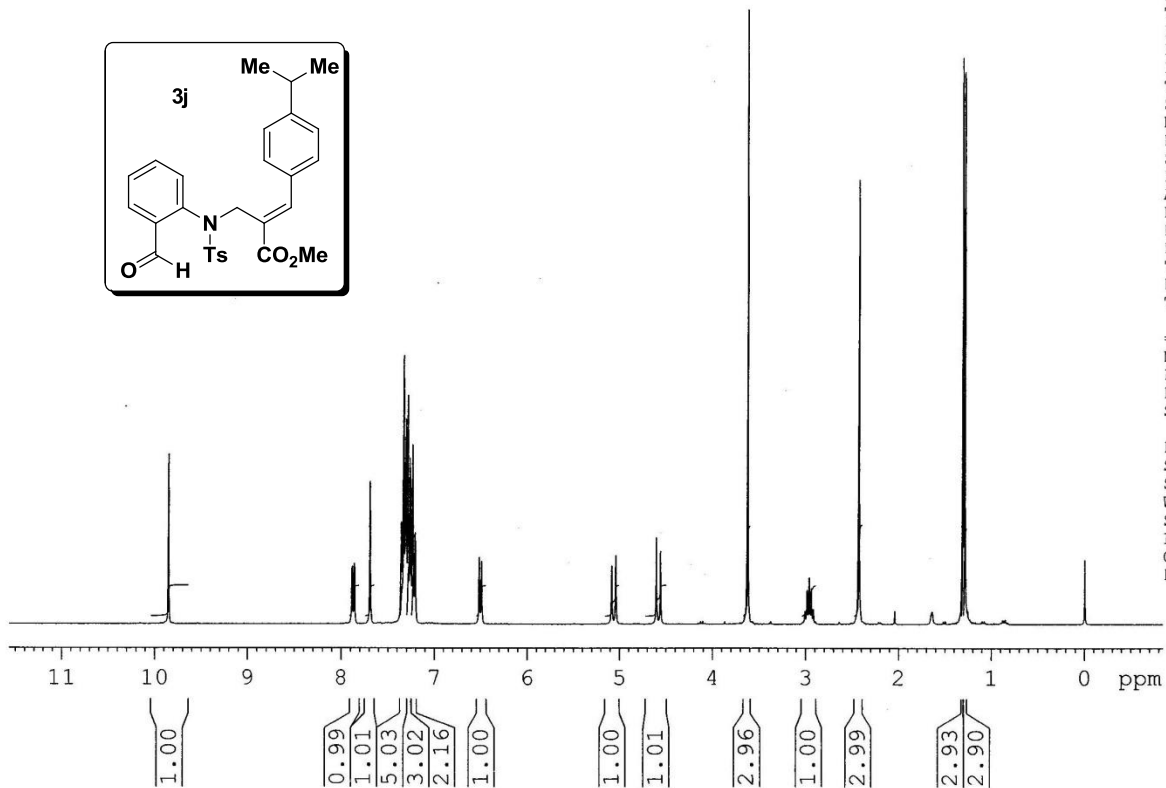

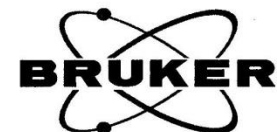

Current Data Parameters  
 NAME DK-V-PIP-EST-TS-CHO  
 EXPNO 2  
 PROCNO 1

F2 - Acquisition Parameters  
 Date\_ 20121211  
 Time 20.02  
 INSTRUM spect  
 PROBHD 5 mm DUL 13C-1  
 PULPROG zgpg30  
 TD 65536  
 SOLVENT CDCl3  
 NS 65  
 DS 4  
 SWH 17985.611 Hz  
 FIDRES 0.274439 Hz  
 AQ 1.8219508 sec  
 RG 512  
 DW 27.800 usec  
 DE 6.00 usec  
 TE 300.0 K  
 D1 2.00000000 sec  
 d11 0.03000000 sec  
 DELTA 1.89999998 sec  
 TD0 1

===== CHANNEL f1 =====  
 NUC1 13C  
 P1 9.30 usec  
 PL1 0.00 dB  
 SFO1 75.4752953 MHz

===== CHANNEL f2 =====  
 CPDPRG2 waltz16  
 NUC2 1H  
 PCPD2 80.00 usec  
 PL2 0.00 dB  
 PL12 15.68 dB  
 PL13 16.00 dB  
 SFO2 300.1312005 MHz

F2 - Processing parameters  
 SI 32768  
 SF 75.4677490 MHz  
 WDW EM  
 SSB 0  
 LB 1.00 Hz  
 GB 0  
 PC 1.40

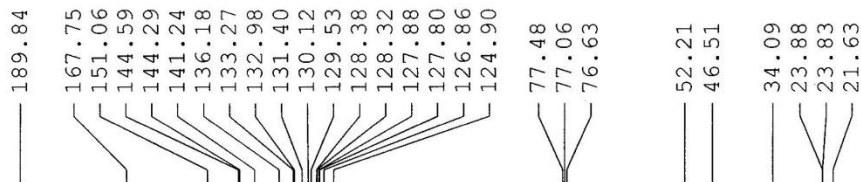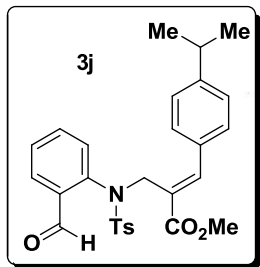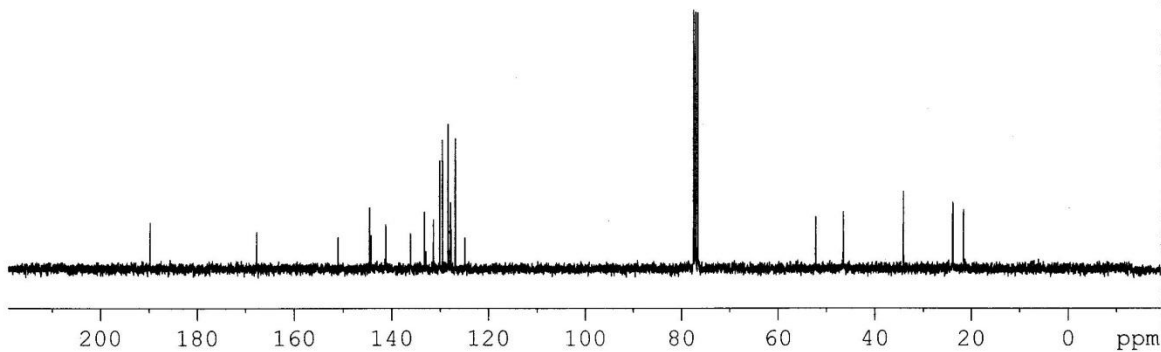

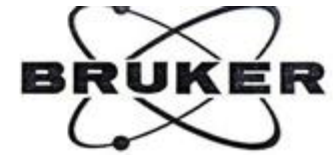

Current Data Parameters  
NAME VV-56-F  
EXPNO 1  
PROCNO 1

F2 - Acquisition Parameters  
Date\_ 20121031  
Time 0.01  
INSTRUM spect  
PROBHD 5 mm DUL 13C-1  
PULPROG zg30  
TD 65536  
SOLVENT CDC13  
NS 9  
DS 2  
SWH 6172.839 Hz  
FIDRES 0.094190 Hz  
AQ 5.3084660 sec  
RG 322.5  
DW 81.000 usec  
DE 6.00 usec  
TE 300.0 K  
D1 1.00000000 sec  
TD0 1

\*\*\*\*\* CHANNEL f1 \*\*\*\*\*  
NUC1 1H  
P1 13.15 usec  
PL1 0.00 dB  
SFO1 300.1318534 MHz

F2 - Processing parameters  
SI 32768  
SF 300.1300274 MHz  
WDW EM  
SSB 0  
LB 0.30 Hz  
GB 0  
PC 1.00

8.025  
8.021  
7.999  
7.574  
7.546  
7.359  
7.331  
7.191  
7.170  
7.158  
7.149  
7.138  
7.109  
7.072  
7.046  
7.021  
5.996  
4.711  
4.668  
3.712  
2.904  
2.878  
2.855  
2.832  
2.809  
2.786  
2.763  
2.641  
2.598  
2.313  
1.176  
1.153

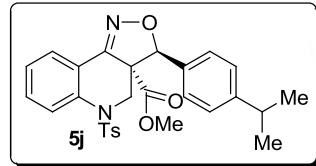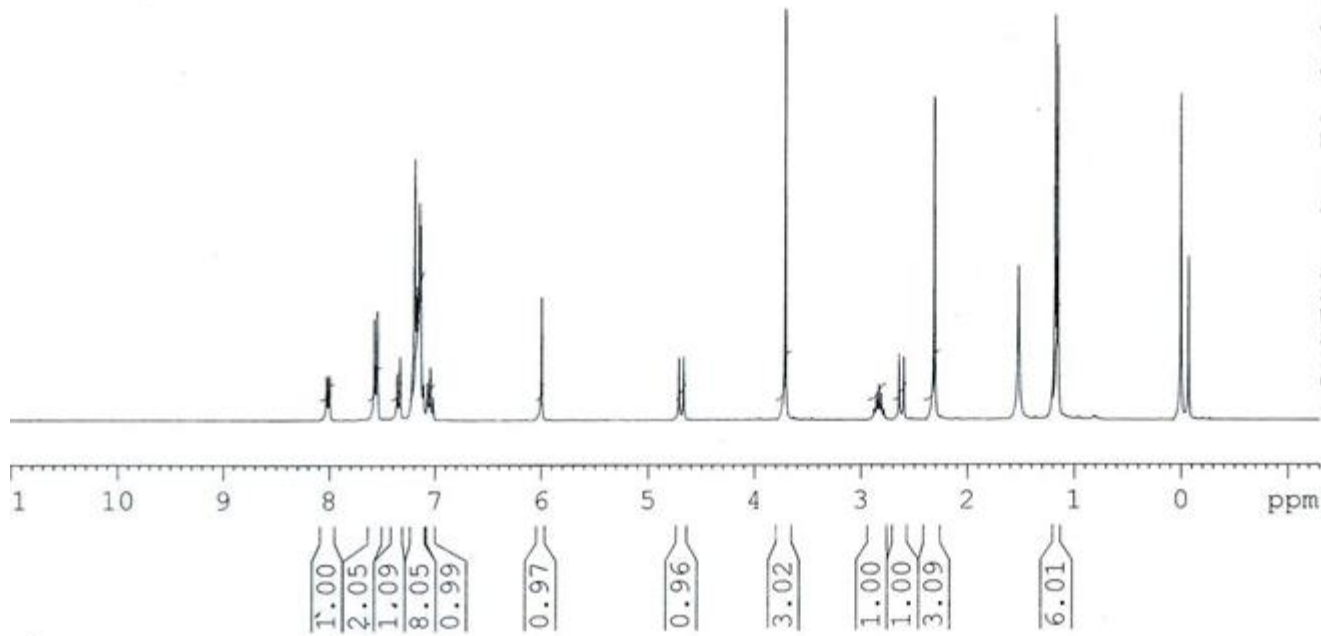

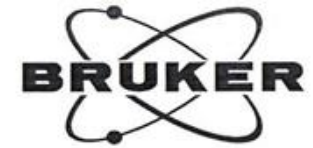

Current Data Parameters  
NAME VV-56-F  
EXPNO 2  
PROCNO 1

F2 - Acquisition Parameters  
Date\_ 20121031  
Time 0.07  
INSTRUM spect  
PROBHD 5 mm DUL 13C-1  
PULPROG zgpg30  
TD 65536  
SOLVENT CDC13  
NS 386  
DS 4  
SWH 17985.611 Hz  
FIDRES 0.274439 Hz  
AQ 1.8219508 sec  
RG 512  
DW 27.800 usec  
DE 6.00 usec  
TE 300.0 K  
D1 2.00000000 sec  
d11 0.03000000 sec  
DELTA 1.89999999 sec  
TD0 1

===== CHANNEL f1 =====  
NUC1 13C  
P1 9.30 usec  
PL1 0.00 dB  
SFO1 75.4752953 MHz

===== CHANNEL f2 =====  
CPDPRG2 waltz16  
NUC2 1H  
PCPD2 80.00 usec  
PL2 0.00 dB  
PL12 15.68 dB  
PL13 16.00 dB  
SFO2 300.1312005 MHz

F2 - Processing parameters  
SI 32768  
SF 75.4677490 MHz  
WDW EM  
SSB 0  
LB 1.00 Hz  
GB 0  
PC 1.40

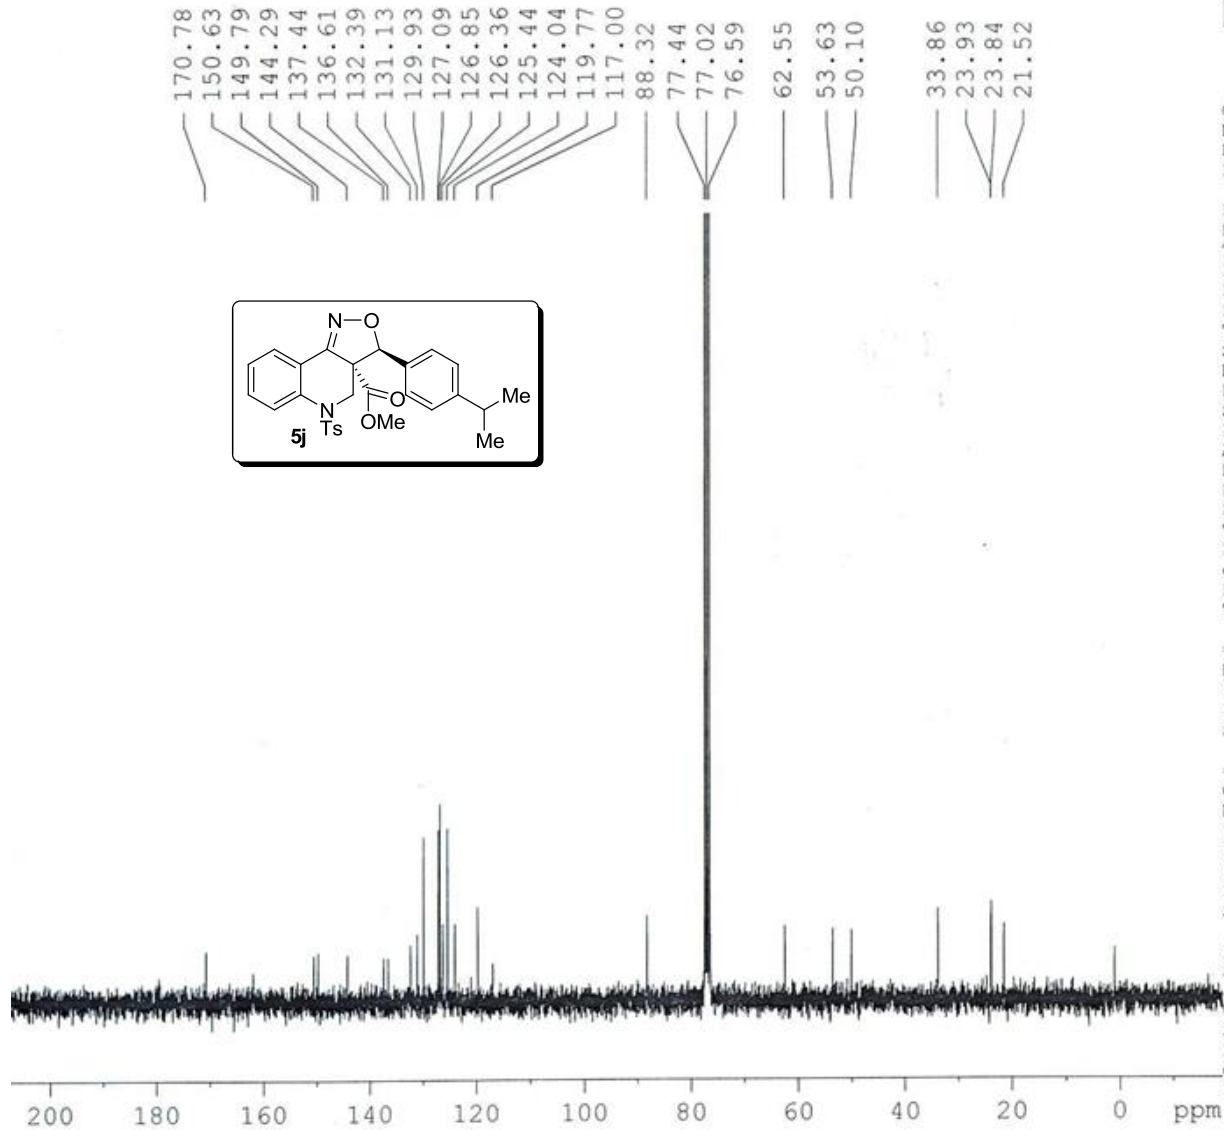

|               |          |             |                      |                 |                 |                        |                     |
|---------------|----------|-------------|----------------------|-----------------|-----------------|------------------------|---------------------|
| Sample Name   | MM-56F   | Position    |                      | Instrument Name | Q-TOF           | User Name              | QTOF-PU\admin       |
| Inj Vol       | -1       | InjPosition |                      | SampleType      | Sample          | IRM Calibration Status | Success             |
| Data Filename | MM-56F.d | ACQ Method  | Pondicherry Universi | Comment         | MSK-MB-504.1718 | Acquired Time          | 05-06-2015 12:47:15 |

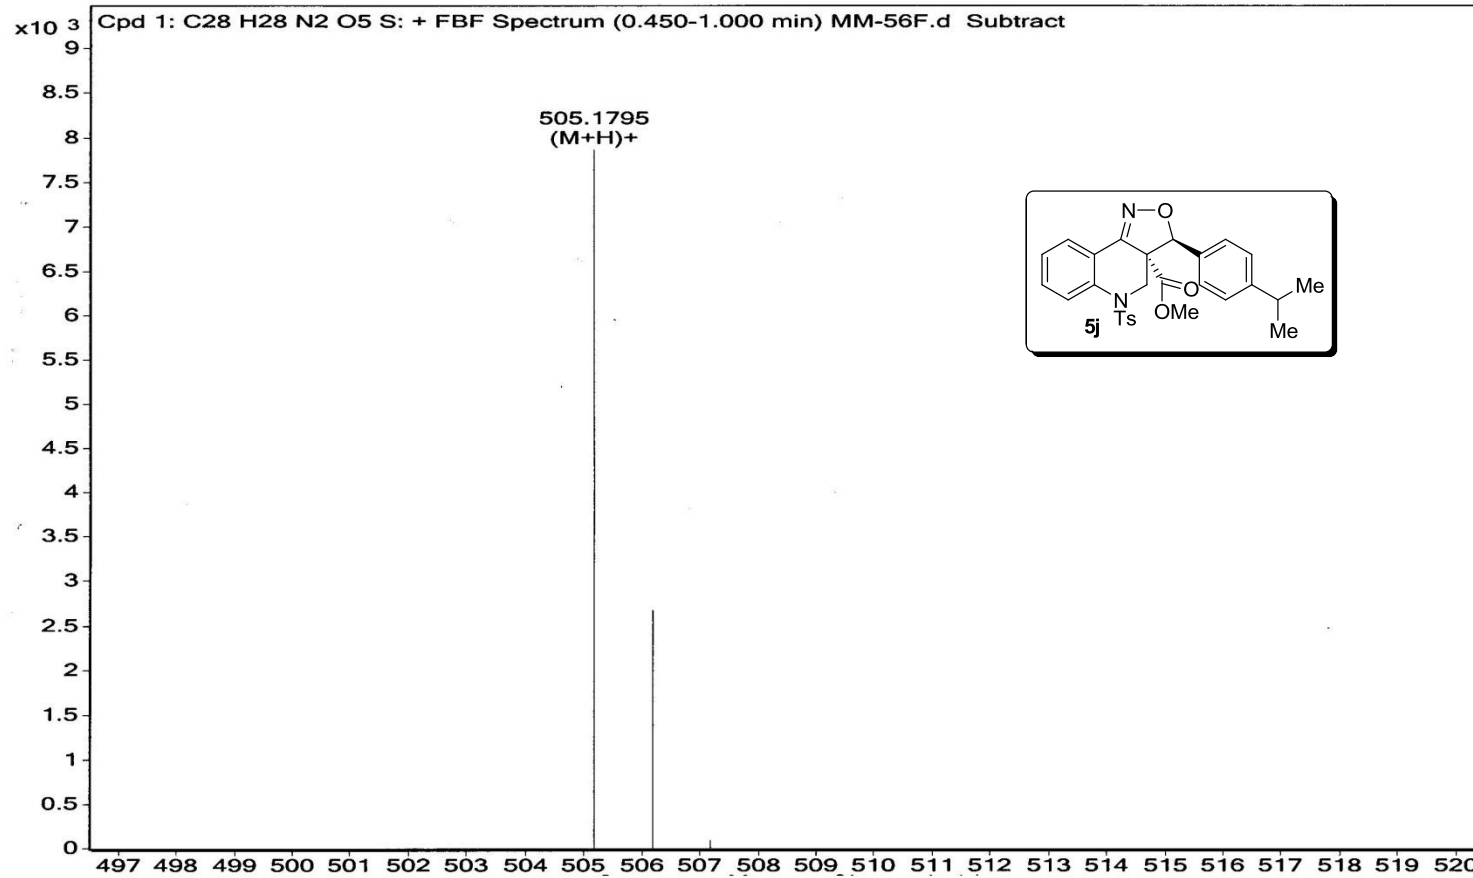

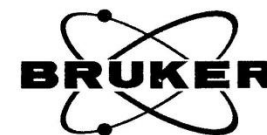

Current Data Parameters  
NAME DK-V-4-F-EST-CHO  
EXPNO 1  
PROCNO 1

F2 - Acquisition Parameters  
Date 20130303  
Time 23.11  
INSTRUM spect  
PROBHD 5 mm DUL 13C-1  
PULPROG zg30  
TD 65536  
SOLVENT CDCl3  
NS 16  
DS 2  
SWH 6172.839 Hz  
FIDRES 0.094190 Hz  
AQ 5.3084660 sec  
RG 57  
DW 81.000 usec  
DE 6.00 usec  
TE 300.0 K  
D1 1.00000000 sec  
TD0 1

===== CHANNEL f1 =====  
NUC1 1H  
P1 13.15 usec  
PL1 0.00 dB  
SFO1 300.1318534 MHz

F2 - Processing parameters  
SI 32768  
SF 300.1300019 MHz  
WDW EM  
SSB 0  
LB 0.30 Hz  
GB 0  
PC 1.00

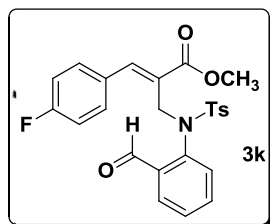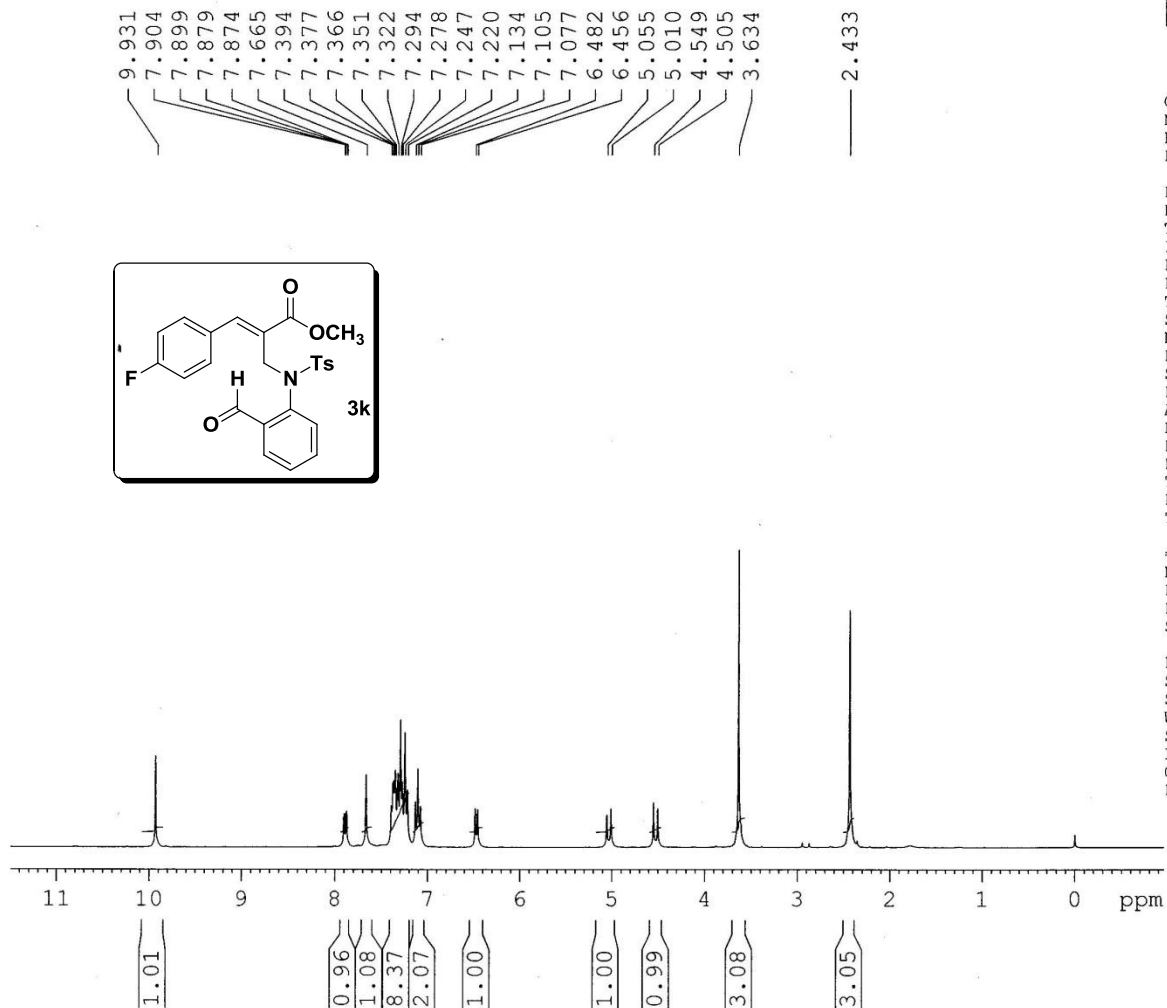



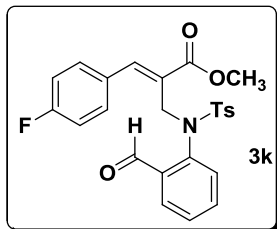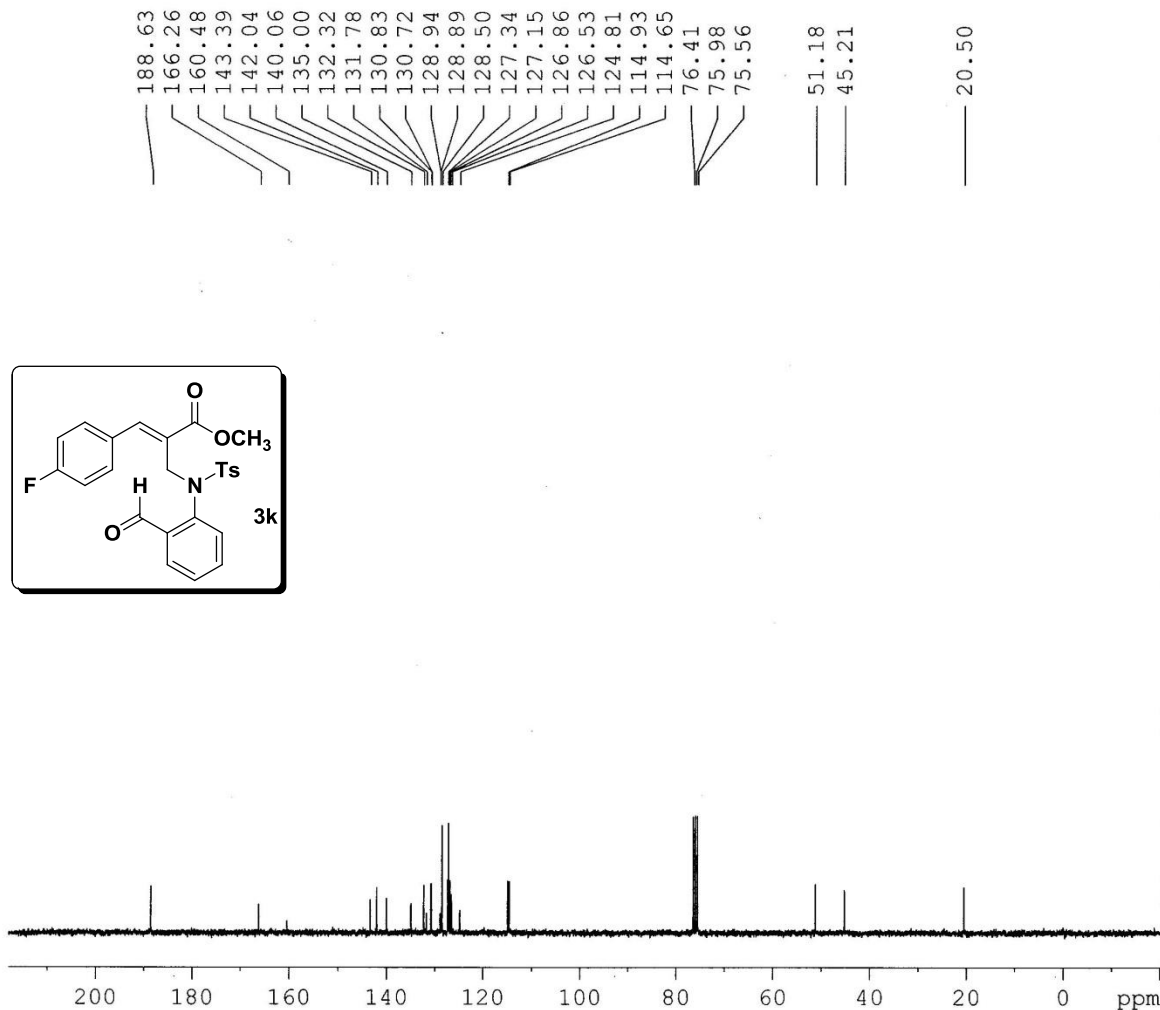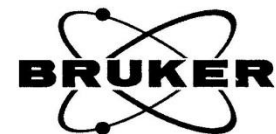

Current Data Parameters  
 NAME DK-V-4-F-EST-CHO  
 EXPNO 2  
 PROCNO 1

F2 - Acquisition Parameters  
 Date\_ 20130303  
 Time 23.19  
 INSTRUM spect  
 PROBHD 5 mm DUL 13C-1  
 PULPROG zgpg30  
 TD 65536  
 SOLVENT CDCl3  
 NS 39  
 DS 4  
 SWH 17985.611 Hz  
 FIDRES 0.274439 Hz  
 AQ 1.8219508 sec  
 RG 1024  
 DW 27.800 usec  
 DE 6.00 usec  
 TE 300.0 K  
 D1 2.00000000 sec  
 d11 0.03000000 sec  
 DELTA 1.89999998 sec  
 TD0 1

===== CHANNEL f1 =====  
 NUC1 13C  
 P1 9.30 usec  
 PL1 0.00 dB  
 SFO1 75.4752953 MHz

===== CHANNEL f2 =====  
 CPDPRG2 waltz16  
 NUC2 1H  
 PCPD2 80.00 usec  
 PL2 0.00 dB  
 PL12 15.68 dB  
 PL13 16.00 dB  
 SFO2 300.1312005 MHz

F2 - Processing parameters  
 SI 32768  
 SF 75.4678335 MHz  
 WDW EM  
 SSB 0  
 LB 1.00 Hz  
 GB 0  
 PC 1.40

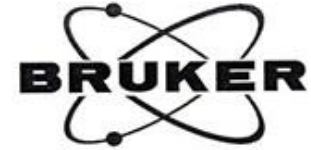

Current Data Parameters  
NAME VV-74F  
EXPNO 1  
PROCNO 1

F2 - Acquisition Parameters  
Date\_ 20130312  
Time\_ 22.23  
INSTRUM spect  
PROBHD 5 mm DUL 13C-1  
PULPROG zg30  
TD 65536  
SOLVENT CDC13  
NS 16  
DS 2  
SWH 6172.839 Hz  
FIDRES 0.094190 Hz  
AQ 5.3084660 sec  
RG 181  
DW 81.000 usec  
DE 6.00 usec  
TE 300.0 K  
D1 1.00000000 sec  
TD0 1

----- CHANNEL f1 -----  
NUC1 1H  
P1 13.15 usec  
PL1 0.00 dB  
SFO1 300.1318534 MHz

F2 - Processing parameters  
SI 32768  
SF 300.1300062 MHz  
WDW EM  
SSB 0  
LB 0.30 Hz  
GB 0  
PC 1.00

8.089  
8.063  
7.646  
7.619  
7.400  
7.372  
7.293  
7.275  
7.264  
7.156  
7.131  
7.106  
7.078  
7.050  
6.097  
4.747  
4.704  
3.797  
2.688  
2.646  
2.396

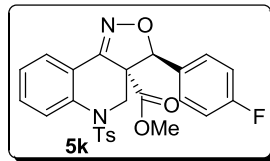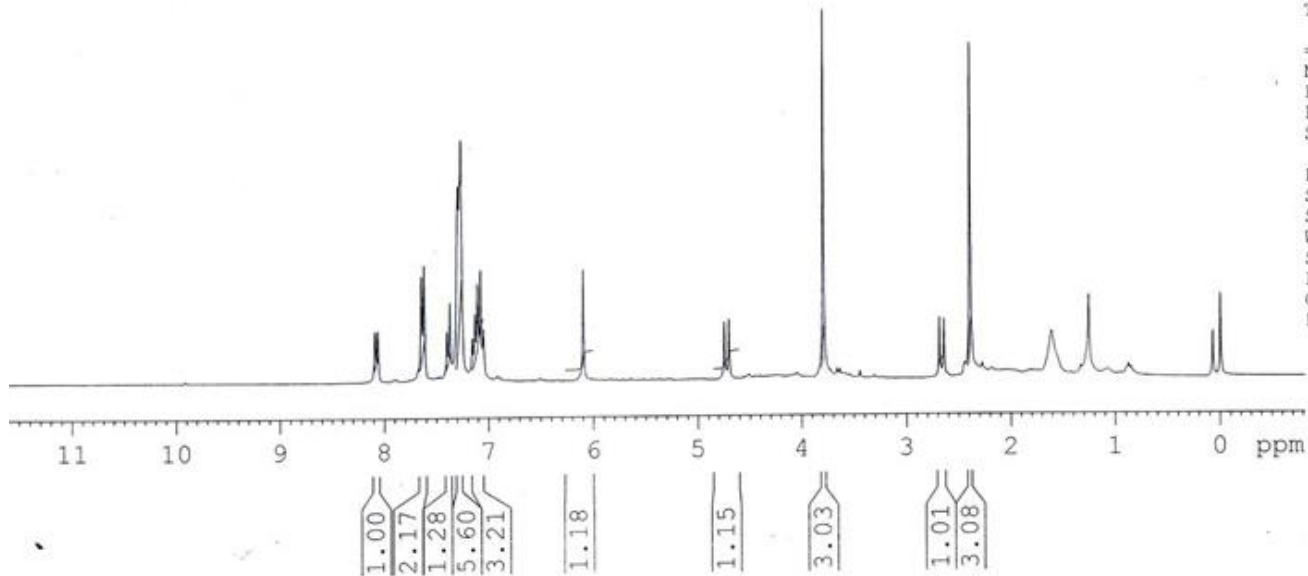

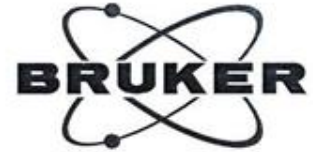

Current Data Parameters  
NAME VV-74F  
EXPNO 2  
PROCNO 1

F2 - Acquisition Parameters  
Date\_ 20130312  
Time\_ 22.33  
INSTRUM spect  
PROBHD 5 mm DUL 13C-1  
PULPROG zgpg30  
TD 65536  
SOLVENT CDCl3  
NS 310  
DS 4  
SWH 17985.611 Hz  
FIDRES 0.274439 Hz  
AQ 1.8219508 sec  
RG 812.7  
DW 27.800 usec  
DE 6.00 usec  
TE 300.0 K  
D1 2.00000000 sec  
d11 0.03000000 sec  
DELTA 1.89999998 sec  
TD0 1

===== CHANNEL f1 =====  
NUC1 13C  
P1 9.30 usec  
PL1 0.00 dB  
SFO1 75.4752953 MHz

===== CHANNEL f2 =====  
CPDPRG2 waltz16  
NUC2 1H  
PCPD2 80.00 usec  
PL2 0.00 dB  
PL12 15.68 dB  
PL13 16.00 dB  
SFO2 300.1312005 MHz

F2 - Processing parameters  
SI 32768  
SF 75.4677490 MHz  
WDW EM  
SSB 0  
LB 1.00 Hz  
GB 0  
PC 1.40

170.53  
150.73  
144.40  
137.55  
136.63  
131.29  
130.94  
130.05  
127.41  
127.30  
126.71  
126.35  
124.17  
119.92  
116.88  
116.28  
115.99  
87.57  
77.45  
77.03  
76.60  
62.62  
53.76  
50.15  
21.54

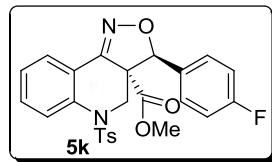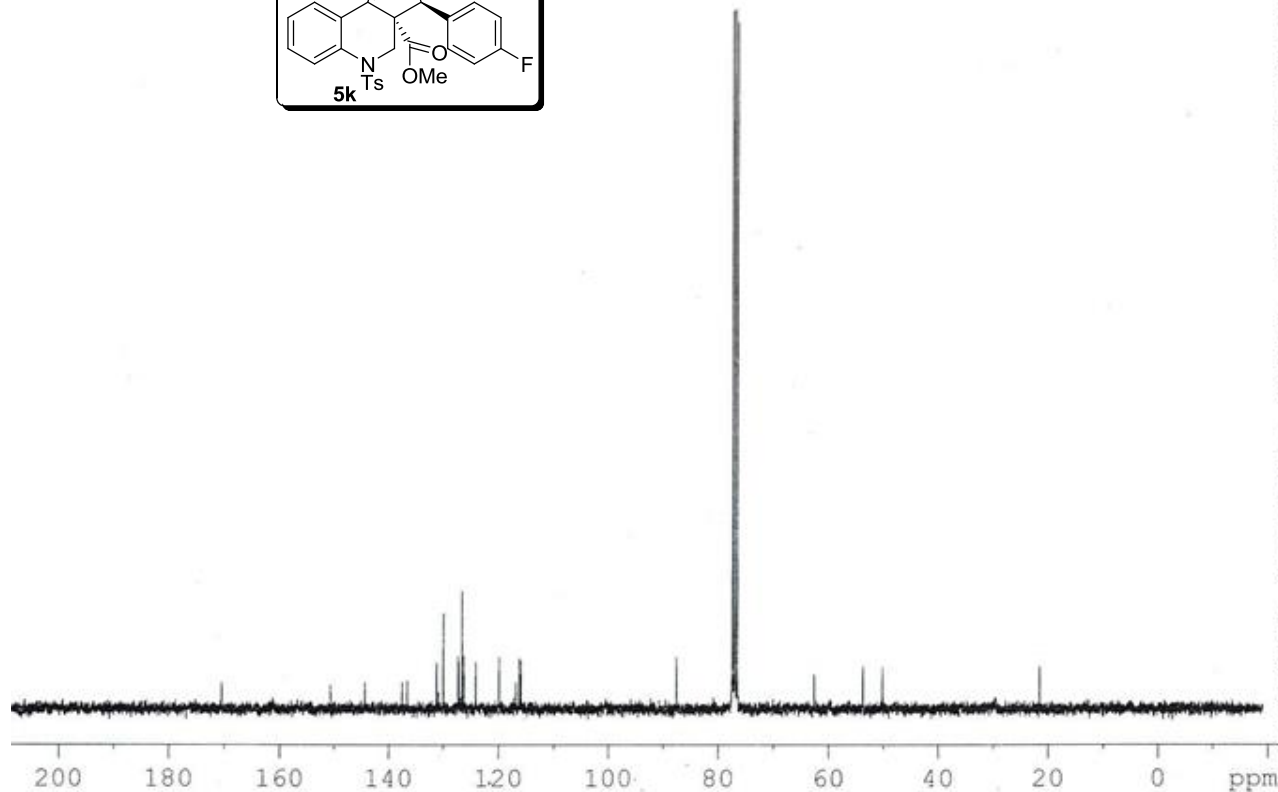

|               |          |             |                      |                 |                 |                        |                     |
|---------------|----------|-------------|----------------------|-----------------|-----------------|------------------------|---------------------|
| Sample Name   | MM-74F   | Position    |                      | Instrument Name | Q-TOF           | User Name              | QTOF-PU\admin       |
| Inj Vol       | -1       | InjPosition |                      | SampleType      | Sample          | IRM Calibration Status | Success             |
| Data Filename | MM-74F.d | ACQ Method  | Pondicherry Universi | Comment         | MSK-MB-480.1155 | Acquired Time          | 05-06-2015 13:16:38 |

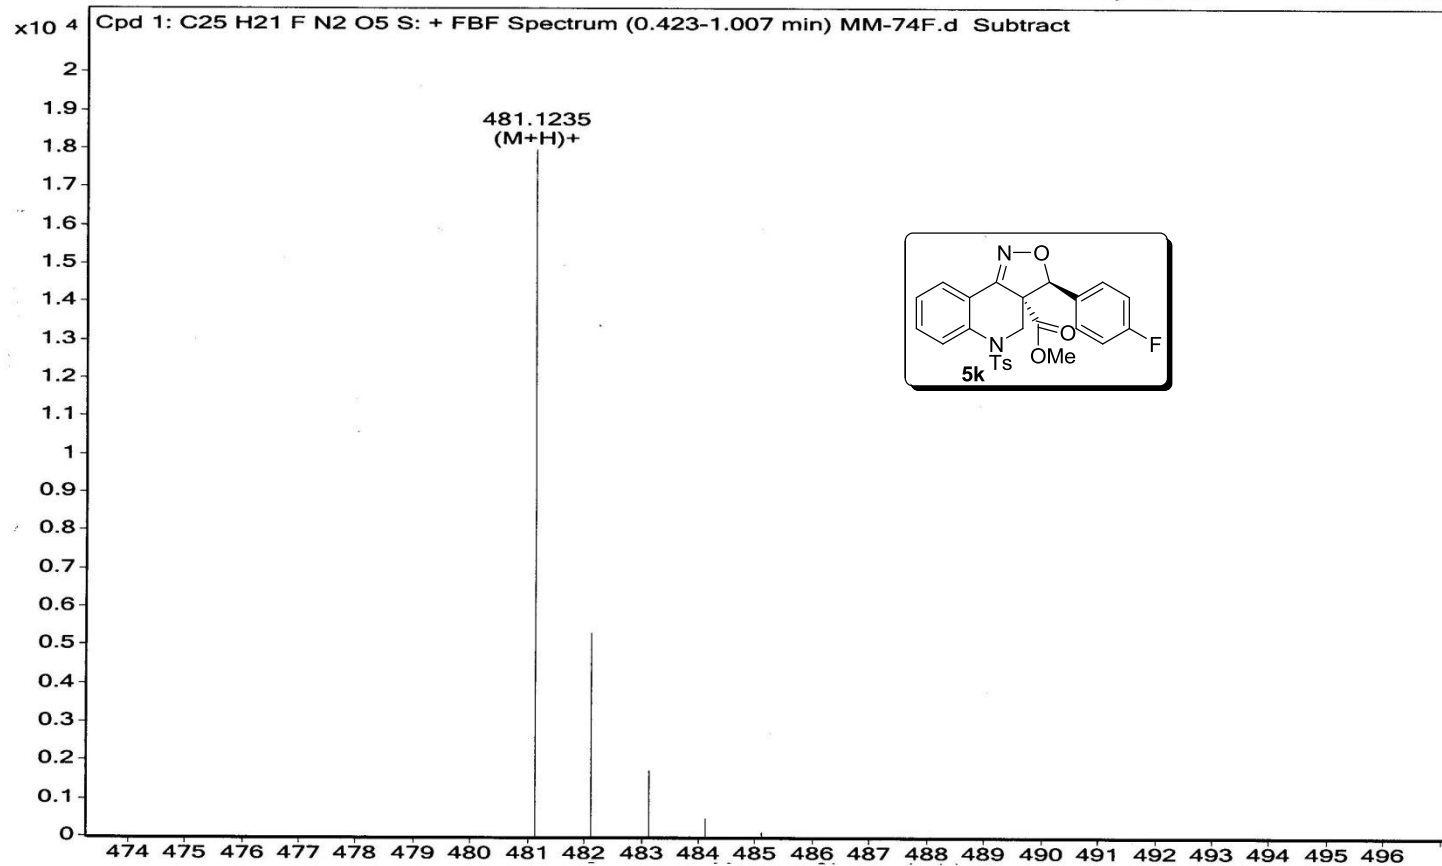

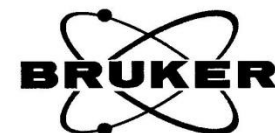

Current Data Parameters  
NAME DK-V-NAP-EST-Ts-CHO  
EXPNO 1  
PROCNO 1

F2 - Acquisition Parameters  
Date\_ 20111009  
Time 16.19  
INSTRUM spect  
PROBHD 5 mm DUL 13C-1  
PULPROG zg30  
TD 65536  
SOLVENT CDCl3  
NS 7  
DS 2  
SWH 6172.839 Hz  
FIDRES 0.094190 Hz  
AQ 5.3084660 sec  
RG 64  
DW 81.000 usec  
DE 6.00 usec  
TE 300.0 K  
D1 1.00000000 sec  
TDO 1

===== CHANNEL f1 =====  
NUC1 1H  
P1 13.15 usec  
PL1 0.00 dB  
SFO1 300.1318534 MHz

F2 - Processing parameters  
SI 32768  
SF 300.1300000 MHz  
WDW EM  
SSB 0  
LB 0.30 Hz  
GB 0  
PC 1.00

10.078  
8.220  
7.882  
7.868  
7.856  
7.842  
7.804  
7.779  
7.532  
7.520  
7.506  
7.492  
7.479  
7.463  
7.439  
7.412  
7.392  
7.380  
7.282  
7.162  
7.143  
7.117  
7.090  
7.062  
6.842  
6.818  
6.795  
6.057  
6.031  
5.016  
4.970  
4.450  
4.405  
3.847  
2.358

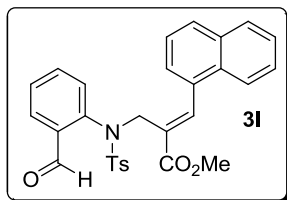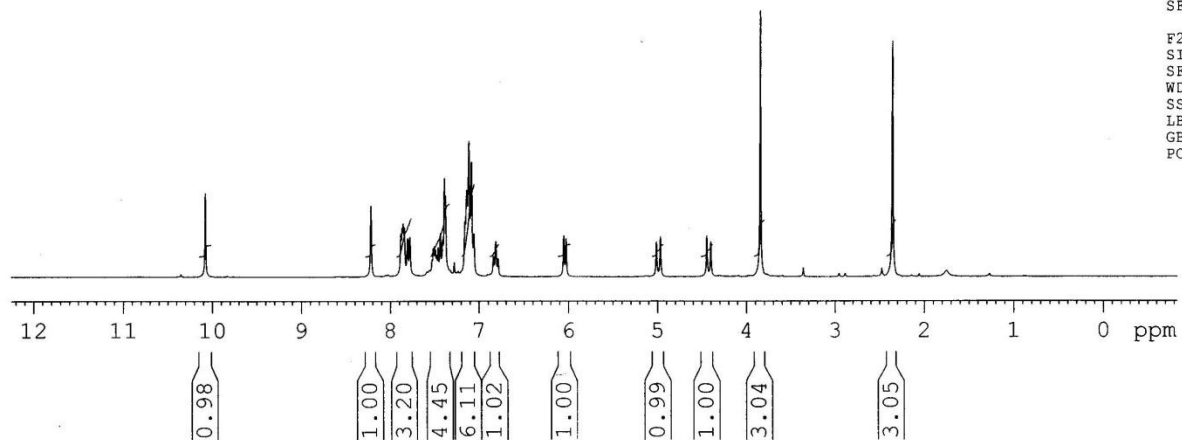

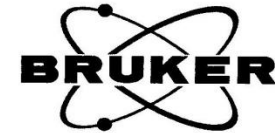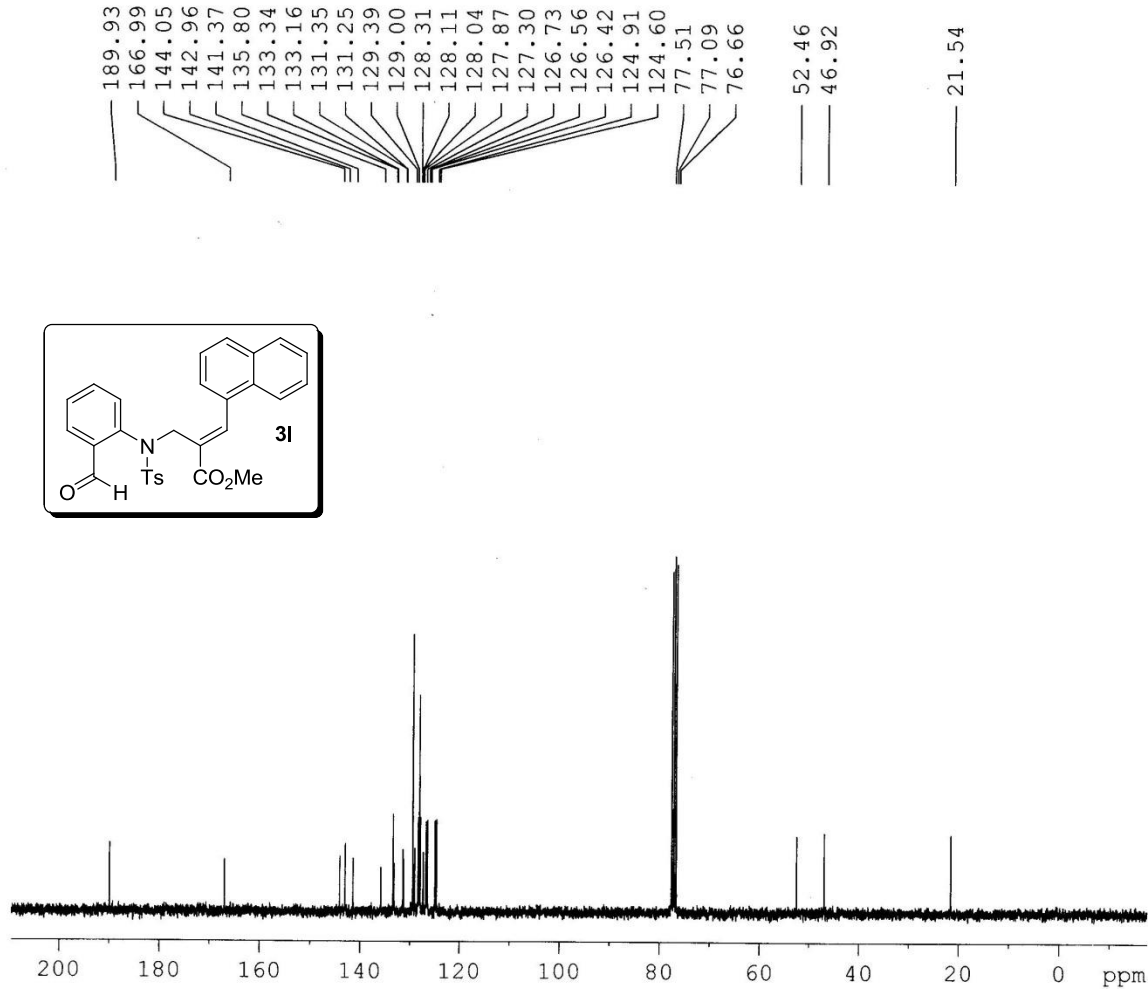

Current Data Parameters  
NAME DK-V-NAP-EST-Ts-CHO  
EXPNO 2  
PROCNO 1

F2 - Acquisition Parameters  
Date\_ 2011009  
Time\_ 16.23  
INSTRUM spect  
PROBHD 5 mm DUL 13C-1  
PULPROG zgpg30  
TD 65536  
SOLVENT CDCl3  
NS 106  
DS 4  
SWH 17985.611 Hz  
FIDRES 0.274439 Hz  
AQ 1.8219508 sec  
RG 2580.3  
DW 27.800 usec  
DE 6.00 usec  
TE 300.0 K  
D1 2.00000000 sec  
d11 0.03000000 sec  
DELTA 1.89999998 sec  
TDO 1

===== CHANNEL f1 =====  
NUC1 13C  
P1 9.30 usec  
PL1 0.00 dB  
SFO1 75.4752953 MHz

===== CHANNEL f2 =====  
CPDPRG2 waltz16  
NUC2 1H  
PCPD2 80.00 usec  
PL2 0.00 dB  
PL12 15.68 dB  
PL13 16.00 dB  
SFO2 300.1312005 MHz

F2 - Processing parameters  
SI 32768  
SF 75.4677490 MHz  
WDW EM  
SSB 0  
LB 1.00 Hz  
GB 0  
PC 1.40

7.930  
7.903  
7.843  
7.816  
7.740  
7.717  
7.692  
7.609  
7.584  
7.559  
7.516  
7.491  
7.463  
7.452  
7.426  
7.401  
7.311  
7.284  
7.261  
7.247  
7.214  
7.189  
7.162  
7.136  
7.112  
6.968  
4.716  
4.673  
3.874  
2.649  
2.606  
2.340

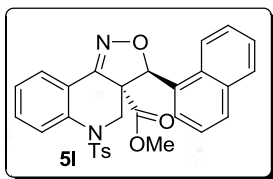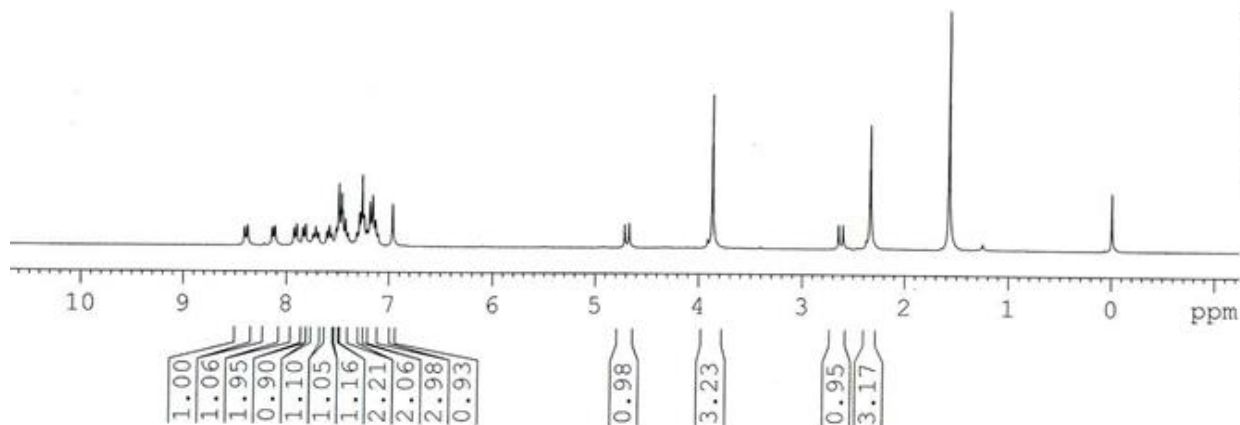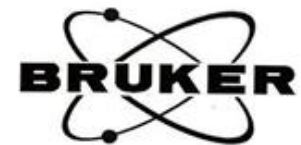

Current Data Parameters  
NAME VV-73F  
EXPNO 1  
PROCNO 1

F2 - Acquisition Parameters  
Date\_ 20130516  
Time\_ 18.11  
INSTRUM spect  
PROBHD 5 mm DUL 13C-1  
PULPROG zg30  
TD 65536  
SOLVENT CDC13  
NS 16  
DS 2  
SWH 6172.839 Hz  
FIDRES 0.094190 Hz  
AQ 5.3084660 sec  
RG 322.5  
DW 81.000 usec  
DE 6.00 usec  
TE 300.0 K  
D1 1.00000000 sec  
TD0 1

===== CHANNEL f1 =====  
NUC1 1H  
P1 13.15 usec  
PL1 0.00 dB  
SFO1 300.1318534 MHz

F2 - Processing parameters  
SI 32768  
SF 300.1300071 MHz  
WDW EM  
SSB 0  
LB 0.30 Hz  
GB 0  
PC 1.00

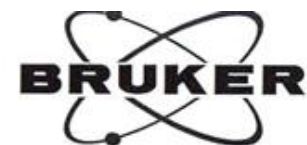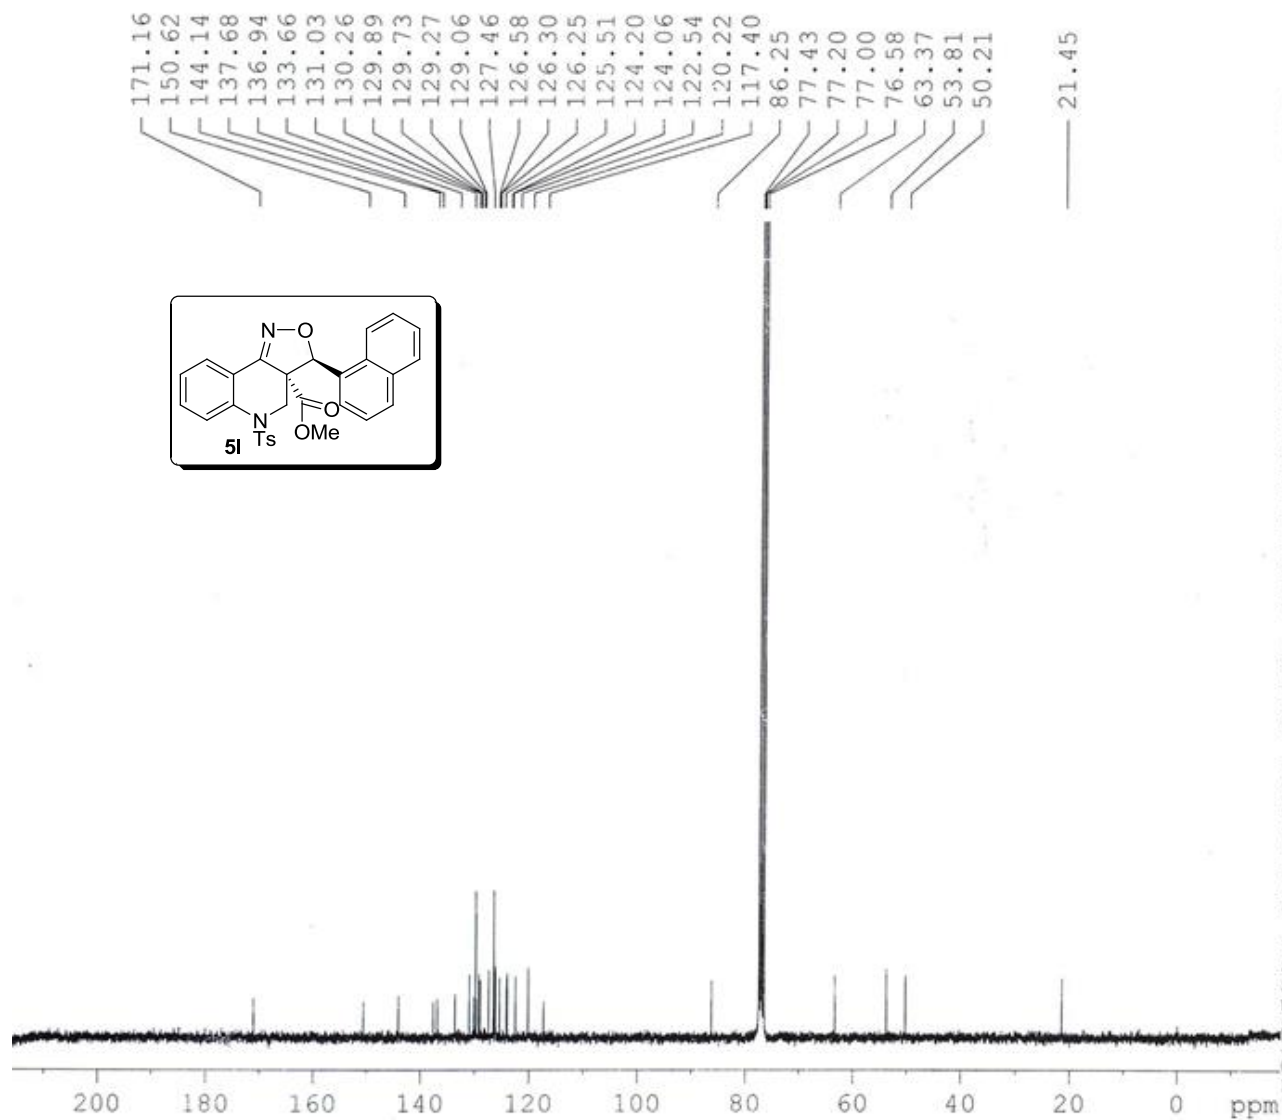

Current Data Parameters  
NAME VV-73F  
EXPNO 3  
PROCNO 1

F2 - Acquisition Parameters  
Date\_ 20130523  
Time\_ 20.22  
INSTRUM spect  
PROBHD 5 mm DUL 13C-1  
PULPROG zgpg30  
TD 65536  
SOLVENT CDCl3  
NS 2155  
DS 4  
SWH 17985.611 Hz  
FIDRES 0.274439 Hz  
AQ 1.8219508 sec  
RG 456.1  
DW 27.800 usec  
DE 6.00 usec  
TE 300.0 K  
D1 2.00000000 sec  
d11 0.03000000 sec  
DELTA 1.89999999 sec  
TDO 1

===== CHANNEL f1 =====  
NUC1 13C  
P1 9.30 usec  
PL1 0.00 dB  
SFO1 75.4752953 MHz

===== CHANNEL f2 =====  
CPDPRG2 waltz16  
NUC2 1H  
PCPD2 80.00 usec  
PL2 0.00 dB  
PL12 15.68 dB  
PL13 16.00 dB  
SFO2 300.1312005 MHz

F2 - Processing parameters  
SI 32768  
SF 75.4677490 MHz  
WDW EM  
SSB 0  
LB 1.00 Hz  
GB 0  
PC 1.40



|                      |          |                    |                      |                        |                 |                               |                     |
|----------------------|----------|--------------------|----------------------|------------------------|-----------------|-------------------------------|---------------------|
| <b>Sample Name</b>   | MM-73F   | <b>Position</b>    |                      | <b>Instrument Name</b> | Q-TOF           | <b>User Name</b>              | QTOF-PU\admin       |
| <b>Inj Vol</b>       | -1       | <b>InjPosition</b> |                      | <b>SampleType</b>      | Sample          | <b>IRM Calibration Status</b> | Success             |
| <b>Data Filename</b> | MM-73F.d | <b>ACQ Method</b>  | Pondicherry Universi | <b>Comment</b>         | MSK-MB-512.1406 | <b>Acquired Time</b>          | 05-06-2015 12:50:52 |

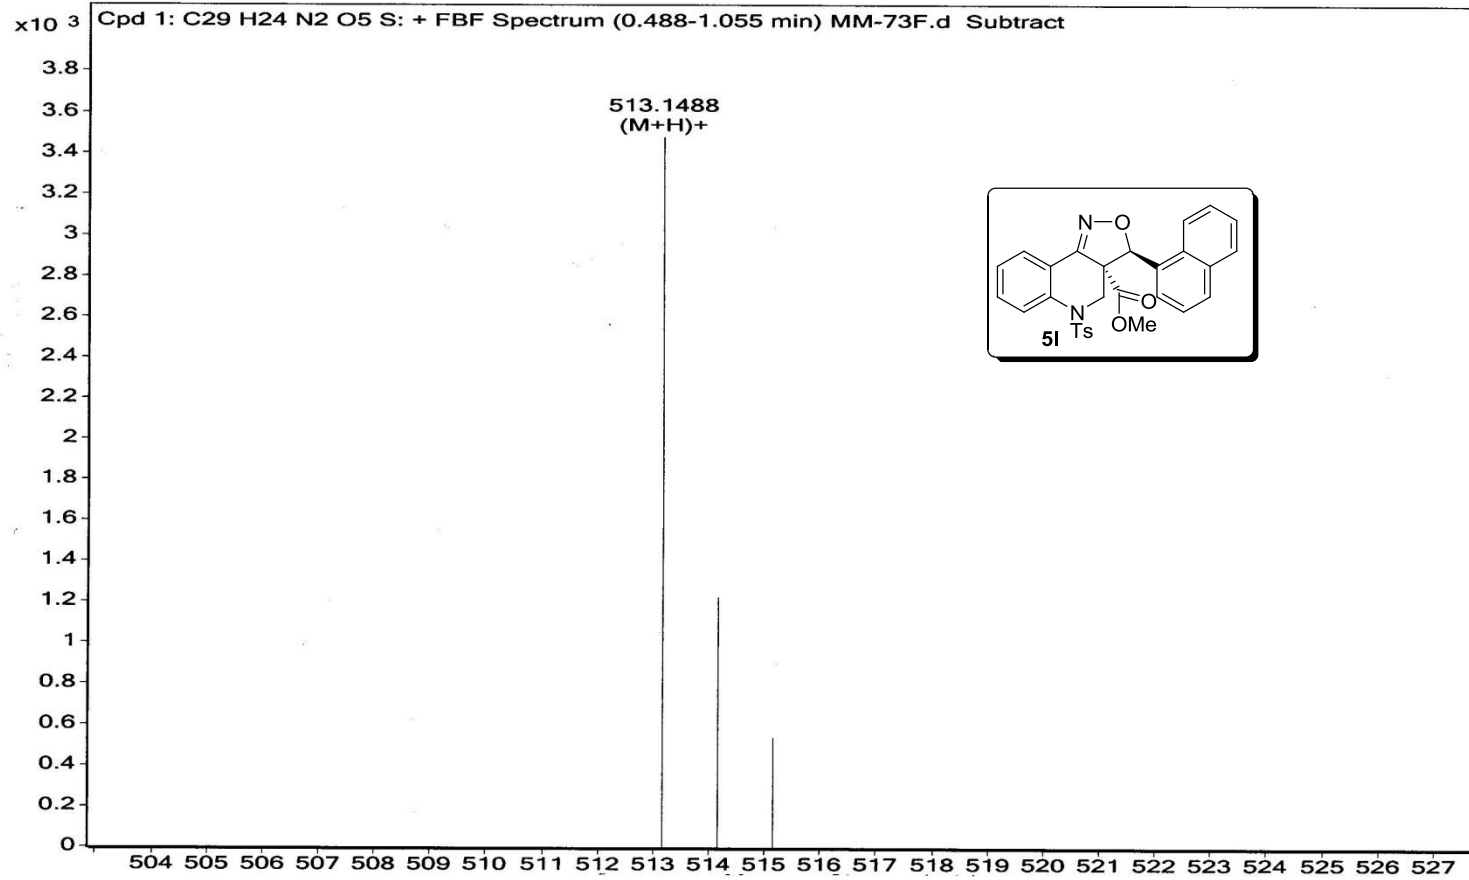

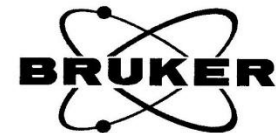

Current Data Parameters  
 NAME DK-V-DI-OME-EST-TS-CHO  
 EXPNO 1  
 PROCNO 1

F2 - Acquisition Parameters

Date\_ 20130305  
 Time\_ 20.57  
 INSTRUM spect  
 PROBHD 5 mm DUL 13C-1  
 PULPROG zg30  
 TD 65536  
 SOLVENT CDCl3  
 NS 16  
 DS 2  
 SWH 6172.839 Hz  
 FIDRES 0.094190 Hz  
 AQ 5.3084660 sec  
 RG 203.2  
 DW 81.000 usec  
 DE 6.00 usec  
 TE 300.0 K  
 D1 1.00000000 sec  
 TDO 1

===== CHANNEL f1 =====  
 NUC1 1H  
 P1 13.15 usec  
 PL1 0.00 dB  
 SFO1 300.1318534 MHz

F2 - Processing parameters  
 SI 32768  
 SF 300.1300050 MHz  
 WDW EM  
 SSB 0  
 LB 0.30 Hz  
 GB 0  
 PC 1.00

9.890  
7.894  
7.888  
7.869  
7.863  
7.628  
7.398  
7.370  
7.342  
7.290  
7.274  
7.266  
7.258  
7.247  
7.148  
7.142  
7.120  
7.114  
7.108  
7.032  
6.941  
6.913  
6.536  
6.510  
5.157  
5.113  
4.698  
4.654  
3.962  
3.946  
3.594  
2.449

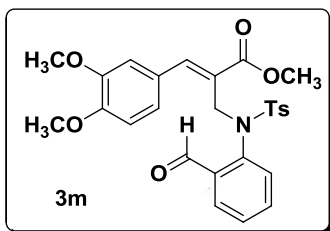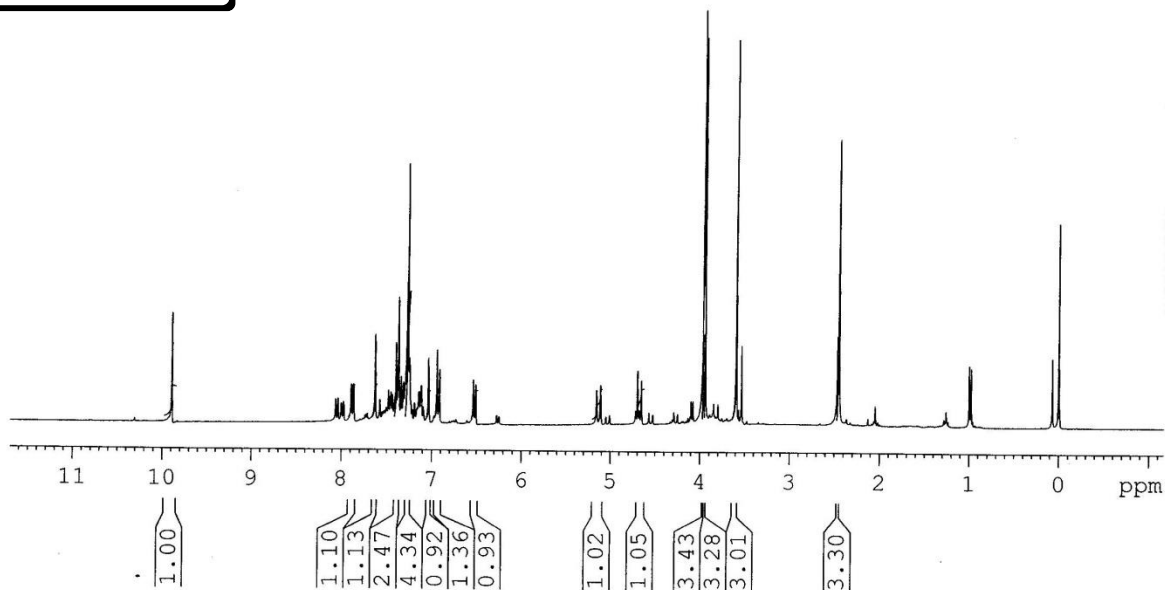

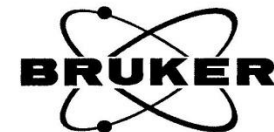

Current Data Parameters  
NAME DK-V-DI-OMe-EST-Ts-CHO  
EXPNO 2  
PROCNO 1

F2 - Acquisition Parameters  
Date\_ 20130305  
Time 21.16  
INSTRUM spect  
PROBHD 5 mm DUL 13C-1  
PULPROG zgpg30  
TD 65536  
SOLVENT CDC13  
NS 277  
DS 4  
SWH 17985.611 Hz  
FIDRES 0.274439 Hz  
AQ 1.8219508 sec  
RG 645.1  
DW 27.800 usec  
DE 6.00 usec  
TE 300.0 K  
D1 2.00000000 sec  
d11 0.03000000 sec  
DELTA 1.89999999 sec  
TD0 1

==== CHANNEL f1 =====  
NUC1 13C  
P1 9.30 usec  
PL1 0.00 dB  
SFO1 75.4752953 MHz

==== CHANNEL f2 =====  
CPDPRG2 waltz16  
NUC2 1H  
PCPD2 80.00 usec  
PL2 0.00 dB  
PL12 15.68 dB  
PL13 16.00 dB  
SFO2 300.1312005 MHz

F2 - Processing parameters  
SI 32768  
SF 75.4677490 MHz  
WDW EM  
SSB 0  
LB 1.00 Hz  
GB 0  
PC 1.40

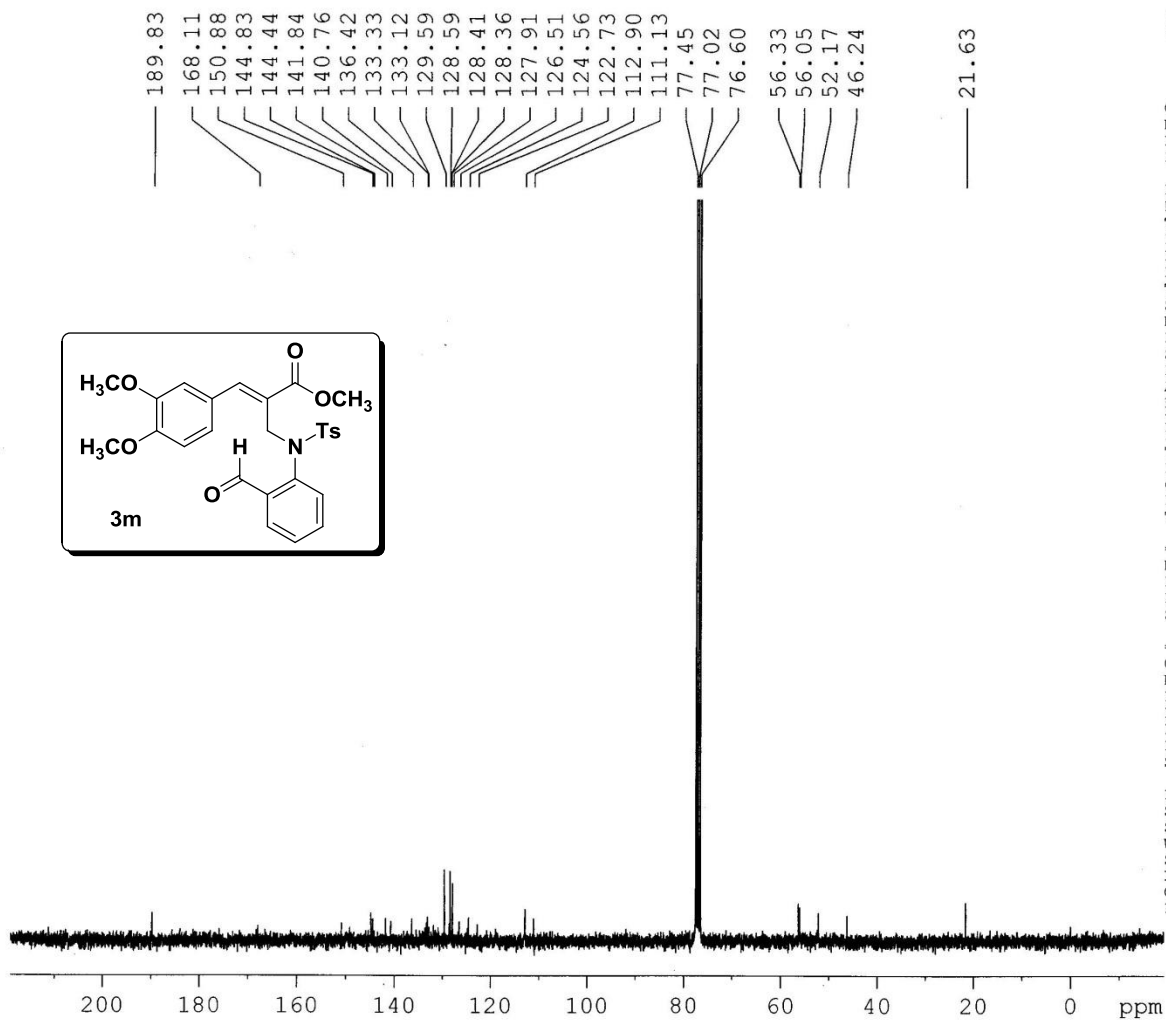

8.089  
8.064  
7.650  
7.624  
7.391  
7.363  
7.293  
7.268  
7.151  
7.126  
7.103  
6.860  
6.759  
6.067  
4.760  
4.717  
3.880  
3.864  
3.792  
2.752  
2.709  
2.397

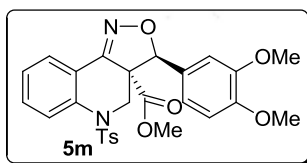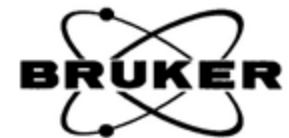

Current Data Parameters  
NAME VV-78  
EXPNO 1  
PROCNO 1

F2 - Acquisition Parameters  
Date\_ 20130409  
Time\_ 21.38  
INSTRUM spect  
PROBHD 5 mm DUL 13C-1  
PULPROG zg30  
TD 65536  
SOLVENT CDCl3  
NS 16  
DS 2  
SWH 6172.839 Hz  
FIDRES 0.094190 Hz  
AQ 5.3084660 sec  
RG 90.5  
DW 81.000 usec  
DE 6.00 usec  
TE 300.0 K  
D1 1.00000000 sec  
TDO 1

----- CHANNEL f1 -----  
NUC1 1H  
P1 13.15 usec  
PL1 0.00 dB  
SFO1 300.1318534 MHz

F2 - Processing parameters  
SI 32768  
SF 300.1300078 MHz  
WDW EM  
SSB 0  
LB 0.30 Hz  
GB 0  
PC 1.00

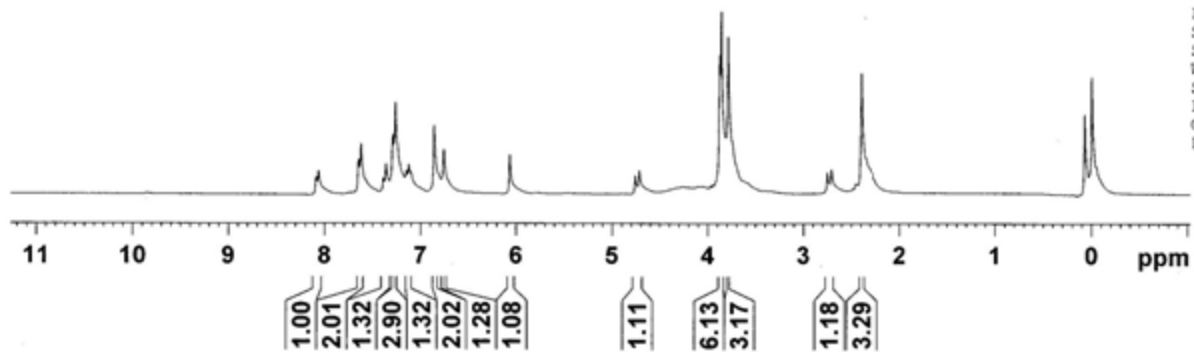

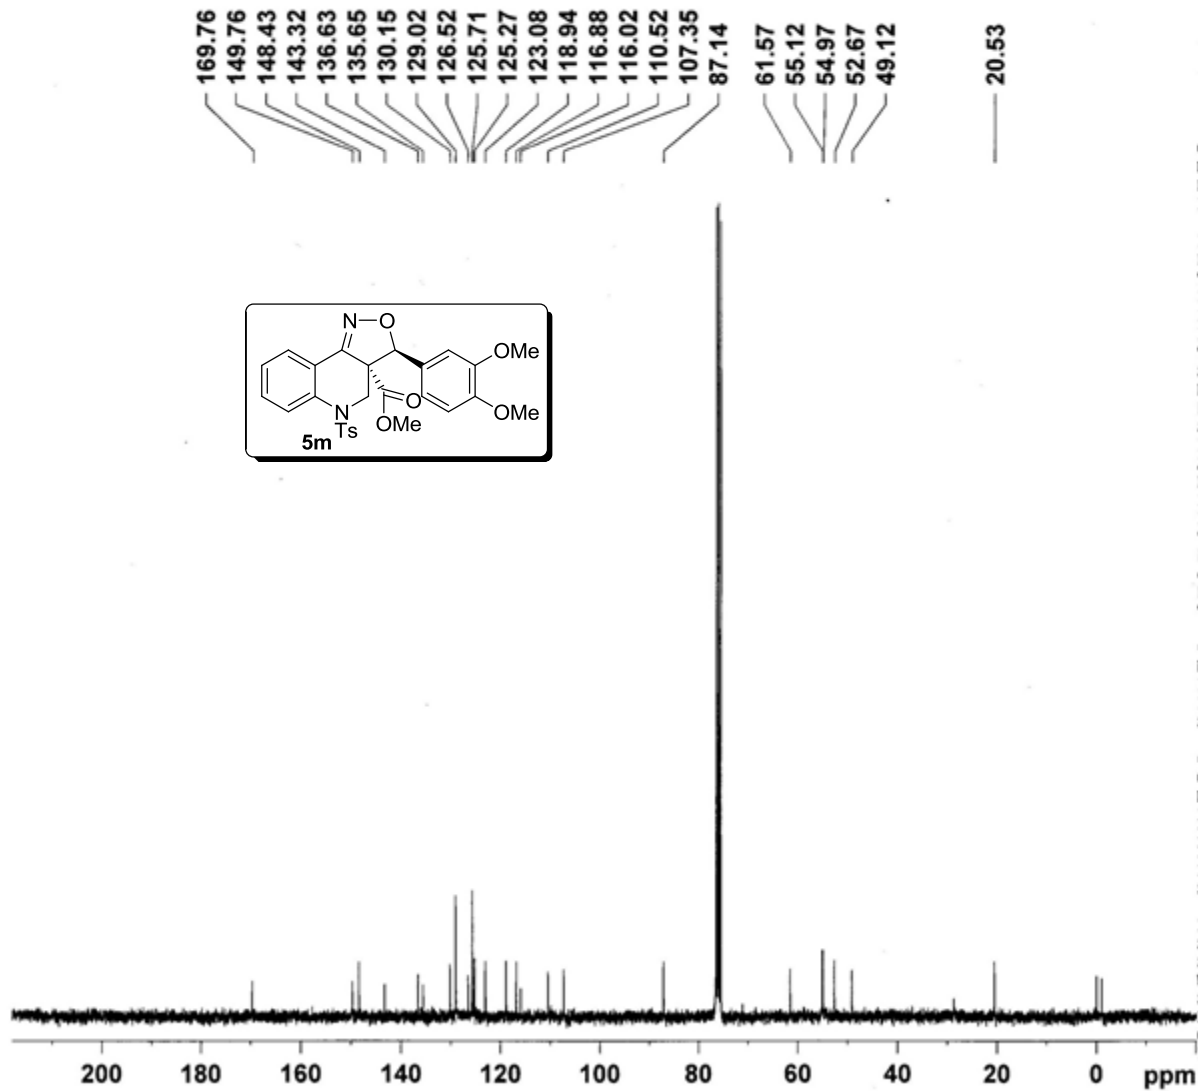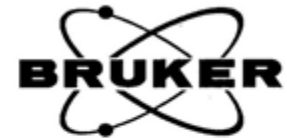

Current Data Parameters  
 NAME VV-78  
 EXPNO 2  
 PROCNO 1

F2 - Acquisition Parameters  
 Date\_ 20130409  
 Time\_ 22.17  
 INSTRUM spect  
 PROBHD 5 mm DUL 13C-1  
 PULPROG zgpg30  
 TD 65536  
 SOLVENT CDC13  
 NS 600  
 DS 4  
 SWH 17985.611 Hz  
 FIDRES 0.274439 Hz  
 AQ 1.8219508 sec  
 RG 1824.6  
 DW 27.800 usec  
 DE 6.00 usec  
 TE 300.0 K  
 D1 2.00000000 sec  
 d11 0.03000000 sec  
 DELTA 1.89999998 sec  
 TDO 1

----- CHANNEL f1 -----  
 NUC1 13C  
 P1 9.30 usec  
 PL1 0.00 dB  
 SFO1 75.4752953 MHz

----- CHANNEL f2 -----  
 CPDPRG2 waltz16  
 NUC2 1H  
 PCPD2 80.00 usec  
 PL2 0.00 dB  
 PL12 15.68 dB  
 PL13 16.00 dB  
 SFO2 300.1312005 MHz

F2 - Processing parameters  
 SI 32768  
 SF 75.4678256 MHz  
 WDW EM  
 SSB 0  
 LB 1.00 Hz  
 GB 0  
 PC 1.40

|               |          |             |                      |                 |                 |                        |                     |
|---------------|----------|-------------|----------------------|-----------------|-----------------|------------------------|---------------------|
| Sample Name   | MM-78F   | Position    |                      | Instrument Name | Q-TOF           | User Name              | QTOF-PU\admin       |
| Inj Vol       | -1       | InjPosition |                      | SampleType      | Sample          | IRM Calibration Status | Success             |
| Data Filename | MM-78F.d | ACQ Method  | Pondicherry Universi | Comment         | MSK-MB-522.1460 | Acquired Time          | 05-06-2015 14:45:06 |

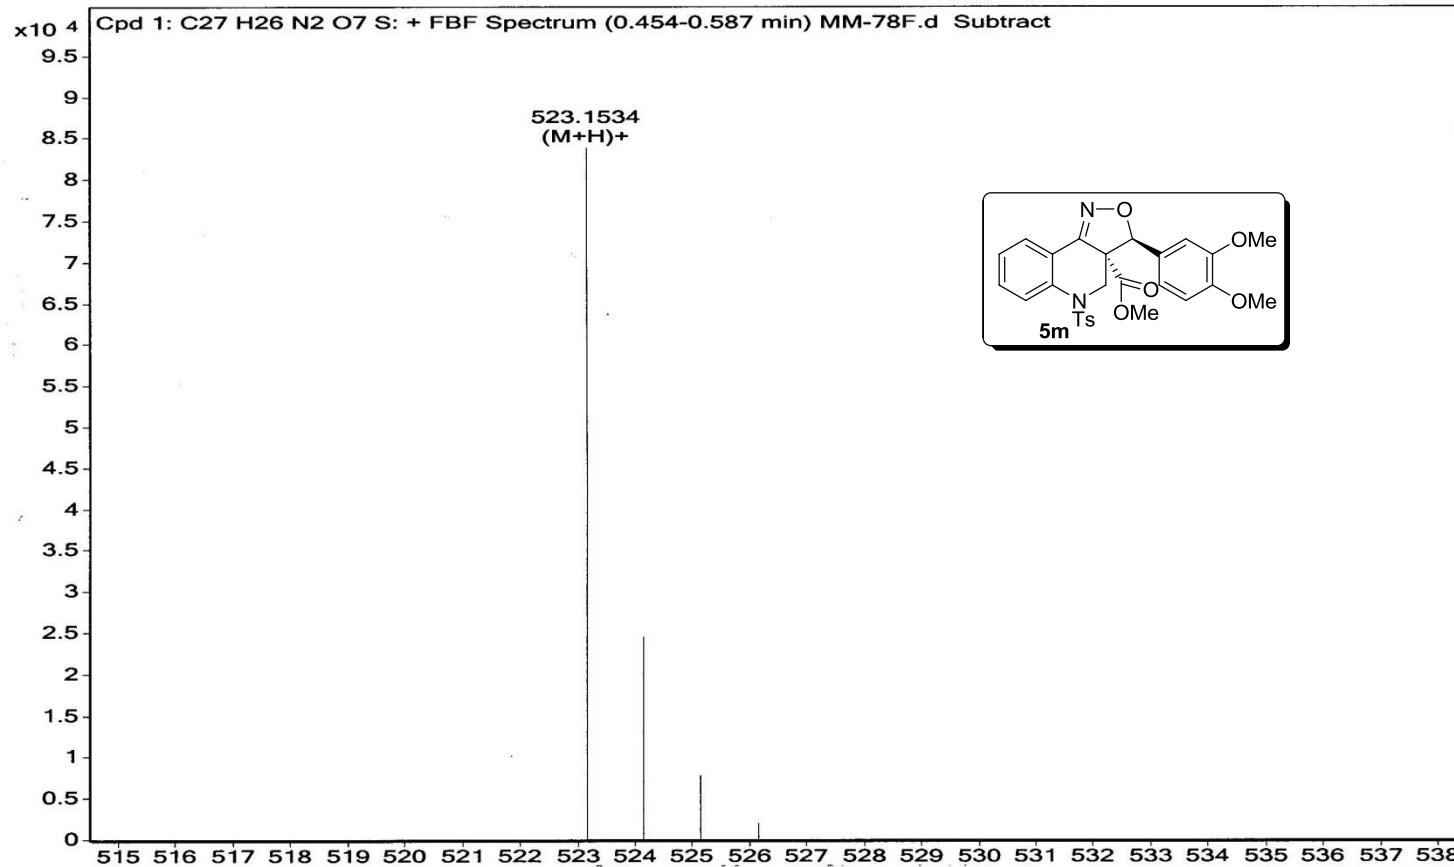

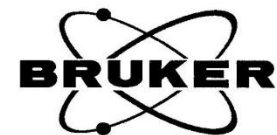

Current Data Parameters  
NAME DK-V-4-ET-EST-CHO  
EXPNO 3  
PROCNO 1

F2 - Acquisition Parameters  
Date\_ 20130303  
Time\_ 23.49  
INSTRUM spect  
PROBHD 5 mm DUL 13C-1  
PULPROG zg30  
TD 65536  
SOLVENT CDCl3  
NS 9  
DS 2  
SWH 6172.839 Hz  
FIDRES 0.094190 Hz  
AQ 5.3084660 sec  
RG 64  
DW 81.000 usec  
DE 6.00 usec  
TE 300.0 K  
D1 1.00000000 sec  
TDO 1

===== CHANNEL f1 =====  
NUC1 1H  
P1 13.15 usec  
PL1 0.00 dB  
SFO1 300.1318534 MHz

F2 - Processing parameters  
SI 32768  
SF 300.1300041 MHz  
WDW EM  
SSB 0  
LB 0.30 Hz  
GB 0  
PC 1.00

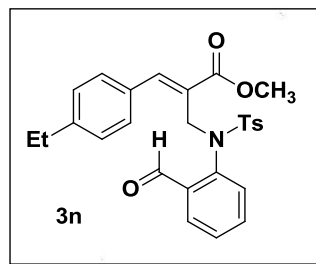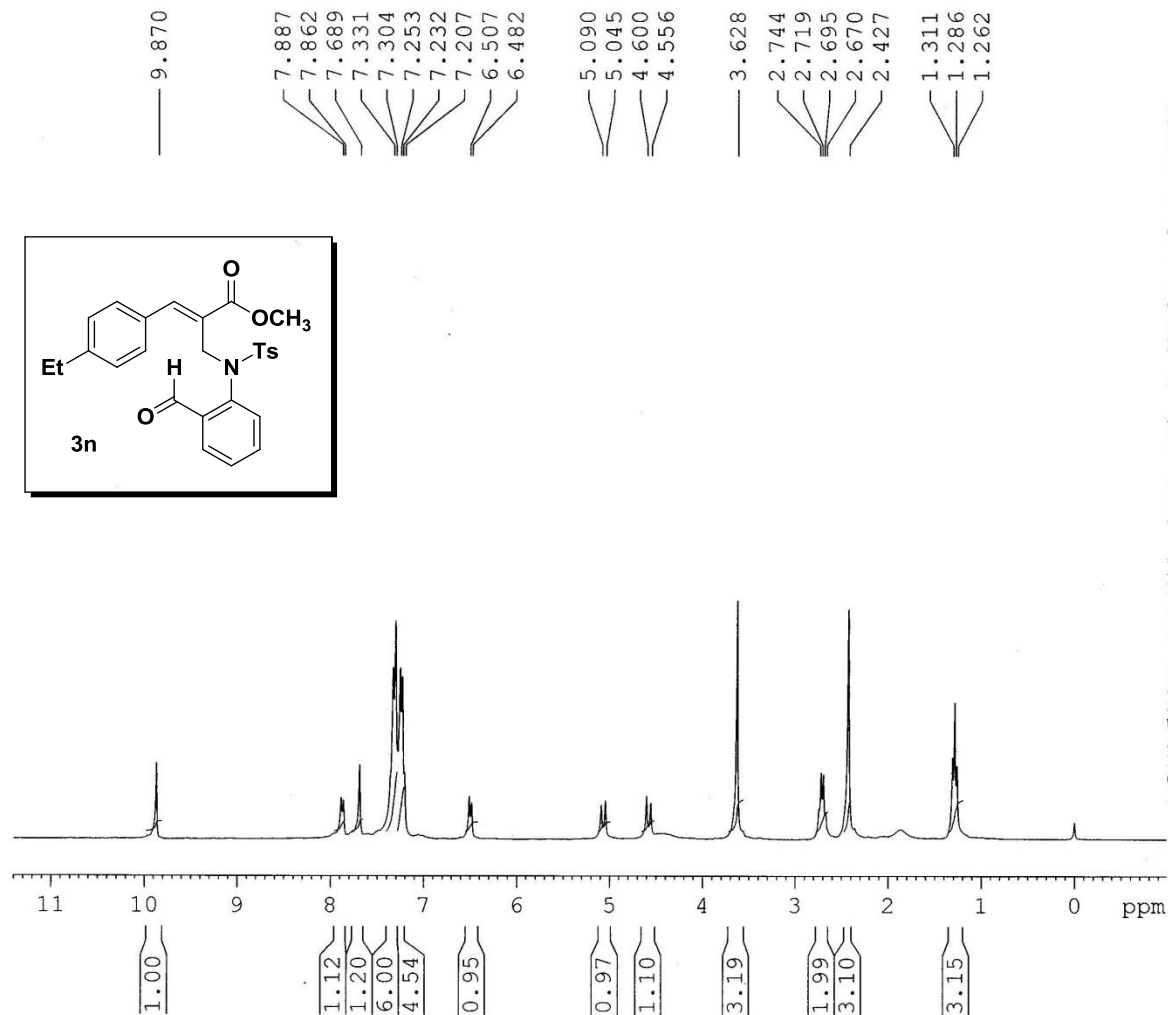

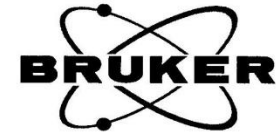

Current Data Parameters  
NAME DK-V-4-ET-EST-CHO  
EXPNO 2  
PROCNO 1

F2 - Acquisition Parameters  
Date 20130303  
Time 23.43  
INSTRUM spect  
PROBHD 5 mm DUL 13C-1  
PULPROG zgpg30  
TD 65536  
SOLVENT CDC13  
NS 90  
DS 4  
SWH 17985.611 Hz  
FIDRES 0.274439 Hz  
AQ 1.8219508 sec  
RG 912.3  
DW 27.800 usec  
DE 6.00 usec  
TE 300.0 K  
D1 2.00000000 sec  
d11 0.03000000 sec  
DELTA 1.89999998 sec  
TDO 1

==== CHANNEL f1 =====  
NUC1 13C  
P1 9.30 usec  
PL1 0.00 dB  
SFO1 75.4752953 MHz

==== CHANNEL f2 =====  
CPDPRG2 waltz16  
NUC2 1H  
PCPD2 80.00 usec  
PL2 0.00 dB  
PL12 15.68 dB  
PL13 16.00 dB  
SFO2 300.1312005 MHz

F2 - Processing parameters  
SI 32768  
SF 75.4677490 MHz  
WDW EM  
SSB 0  
LB 1.00 Hz  
GB 0  
PC 1.40

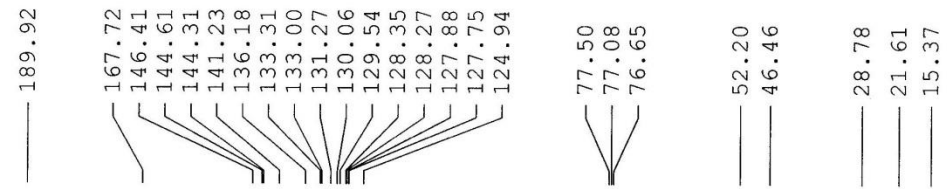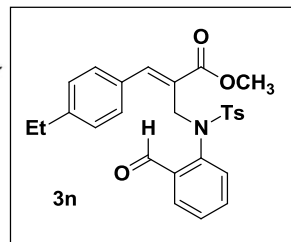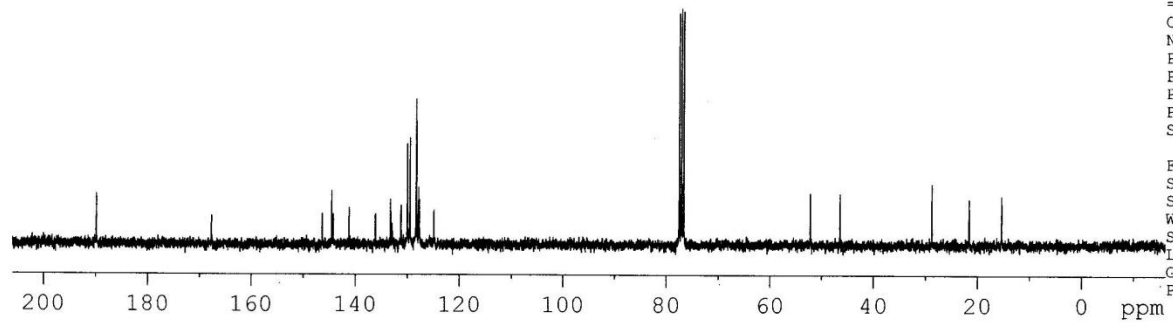



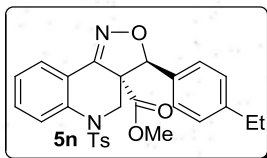

8.095  
8.070  
7.647  
7.621  
7.409  
7.381  
7.274  
7.261  
7.199  
7.144  
7.118  
6.077  
4.774  
4.731  
3.785  
2.720  
2.678  
2.656  
2.631  
2.386  
1.249  
1.224  
1.199

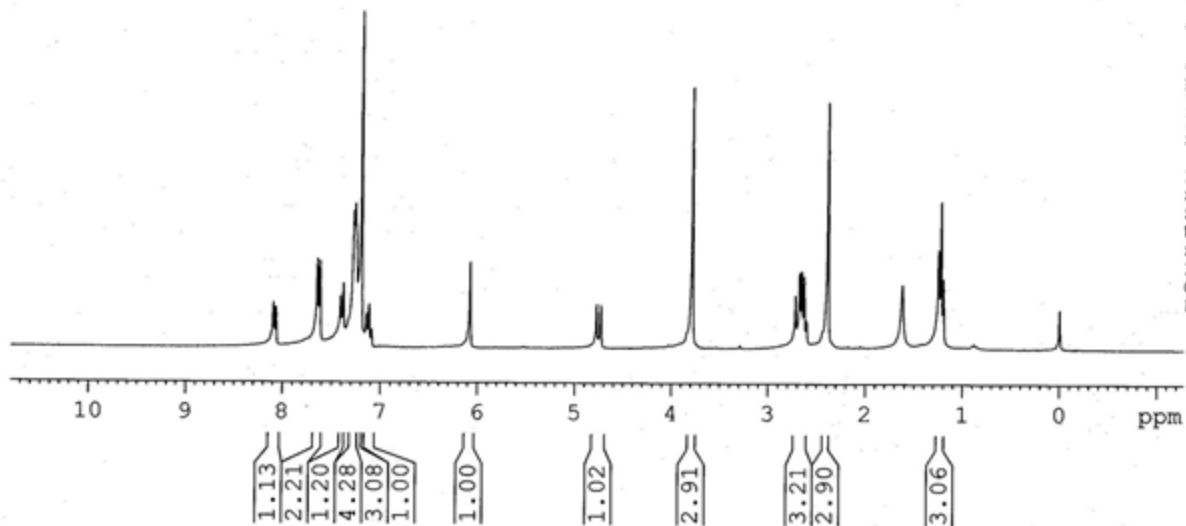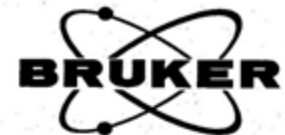

Current Data Parameters  
NAME VV-78C  
EXPNO 1  
PROCNO 1

F2 - Acquisition Parameters  
Date\_ 20141202  
Time\_ 22.32  
INSTRUM spect  
PROBHD 5 mm DUL 13C-1  
PULPROG zg30  
TD 65536  
SOLVENT CDCl3  
NS 16  
DS 2  
SWH 6172.839 Hz  
FIDRES 0.094190 Hz  
AQ 5.3084660 sec  
RG 161.3  
DW 81.000 usec  
DE 6.00 usec  
TE 300.0 K  
D1 1.00000000 sec  
TD0 1

----- CHANNEL f1 -----  
NUC1 1H  
P1 13.15 usec  
PL1 0.00 dB  
SFO1 300.1318534 MHz

F2 - Processing parameters  
SI 32768  
SF 300.1300064 MHz  
WDW EM  
SSB 0  
LB 0.30 Hz  
GB 0  
PC 1.00

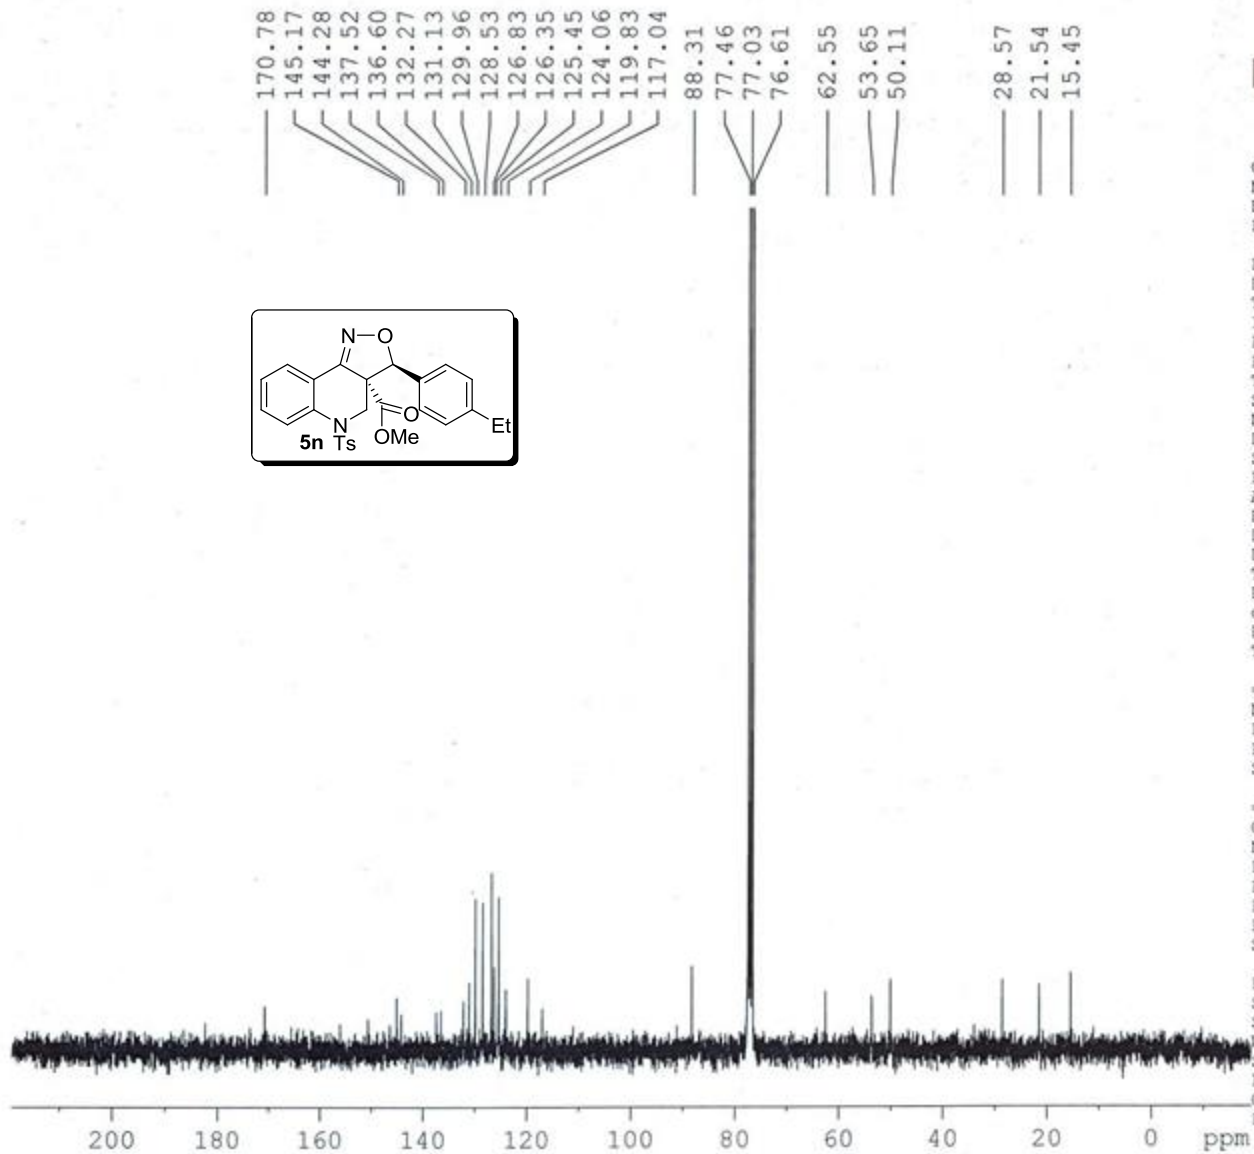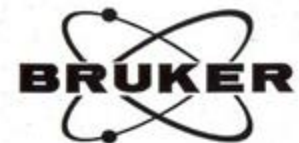

Current Data Parameters  
 NAME VV-78C  
 EXPNO 2  
 PROCNO 1

F2 - Acquisition Parameters  
 Date 20141202  
 Time 22.38  
 INSTRUM spect  
 PROBHD 5 mm DUL 13C-1  
 PULPROG zgpg30  
 TD 65536  
 SOLVENT CDC13  
 NS 210  
 DS 4  
 SWH 17985.611 Hz  
 FIDRES 0.274439 Hz  
 AQ 1.8219508 sec  
 RG 2298.8  
 DW 27.800 usec  
 DE 6.00 usec  
 TE 300.0 K  
 D1 2.00000000 sec  
 d11 0.03000000 sec  
 DELTA 1.89999998 sec  
 TDO 1

===== CHANNEL f1 =====  
 NUC1 13C  
 P1 9.30 usec  
 PL1 0.00 dB  
 SFO1 75.4752953 MHz

===== CHANNEL f2 =====  
 CPDPRG2 waltz16  
 NUC2 1H  
 PCPD2 80.00 usec  
 PL2 0.00 dB  
 PL12 15.68 dB  
 PL13 16.00 dB  
 SFO2 300.1312005 MHz

F2 - Processing parameters  
 SI 32768  
 SF 75.4677490 MHz  
 WDW EM  
 SSB 0  
 LB 1.00 Hz  
 GB 0  
 PC 1.40

|               |          |             |                      |                 |                 |                        |                     |
|---------------|----------|-------------|----------------------|-----------------|-----------------|------------------------|---------------------|
| Sample Name   | MM-78C   | Position    |                      | Instrument Name | Q-TOF           | User Name              | QTOF-PU\admin       |
| Inj Vol       | -1       | InjPosition |                      | SampleType      | Sample          | IRM Calibration Status | Success             |
| Data Filename | MM-78C.d | ACQ Method  | Pondicherry Universi | Comment         | MSK-MB-490.1562 | Acquired Time          | 05-06-2015 14:24:55 |

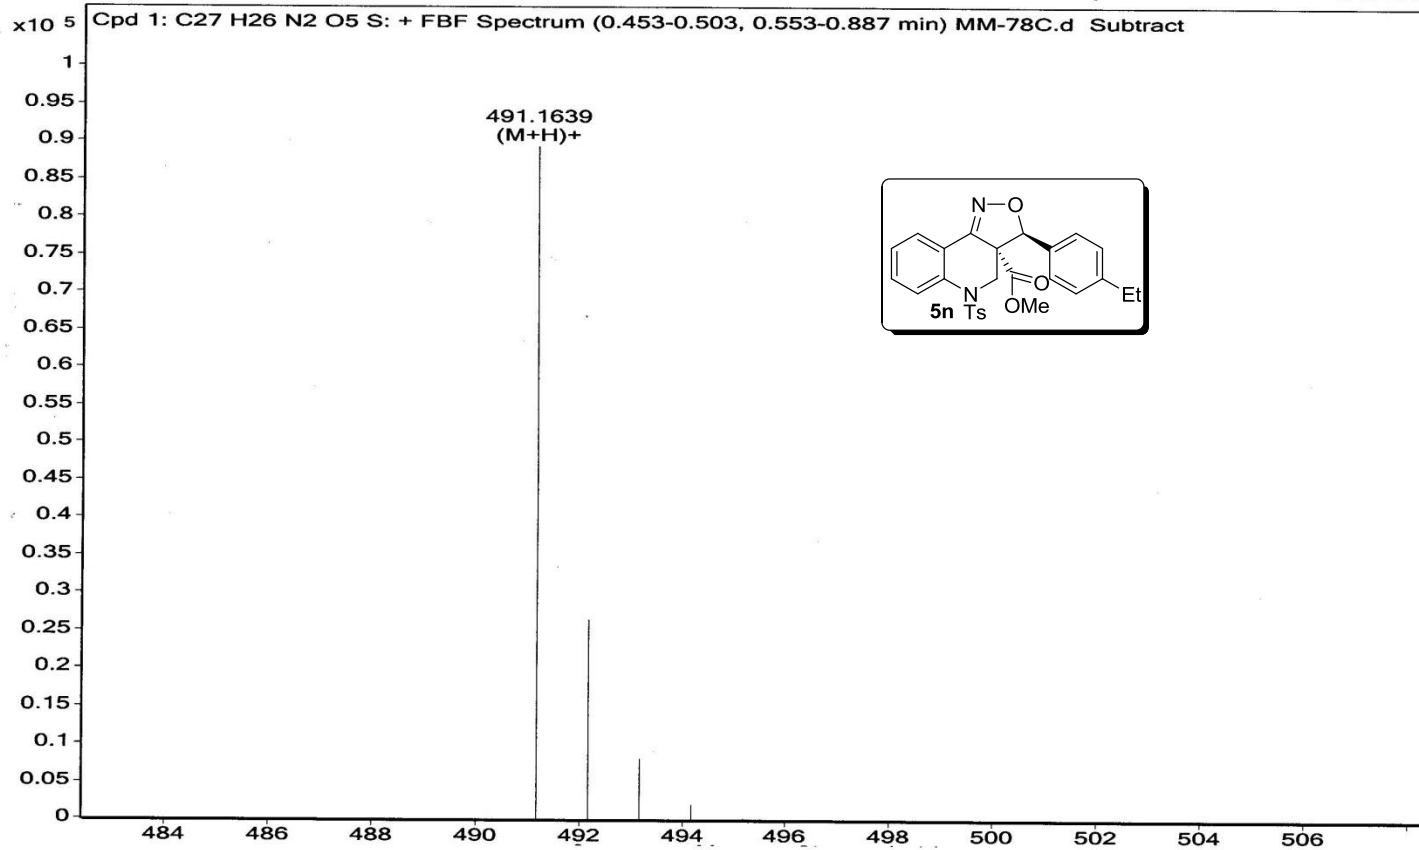

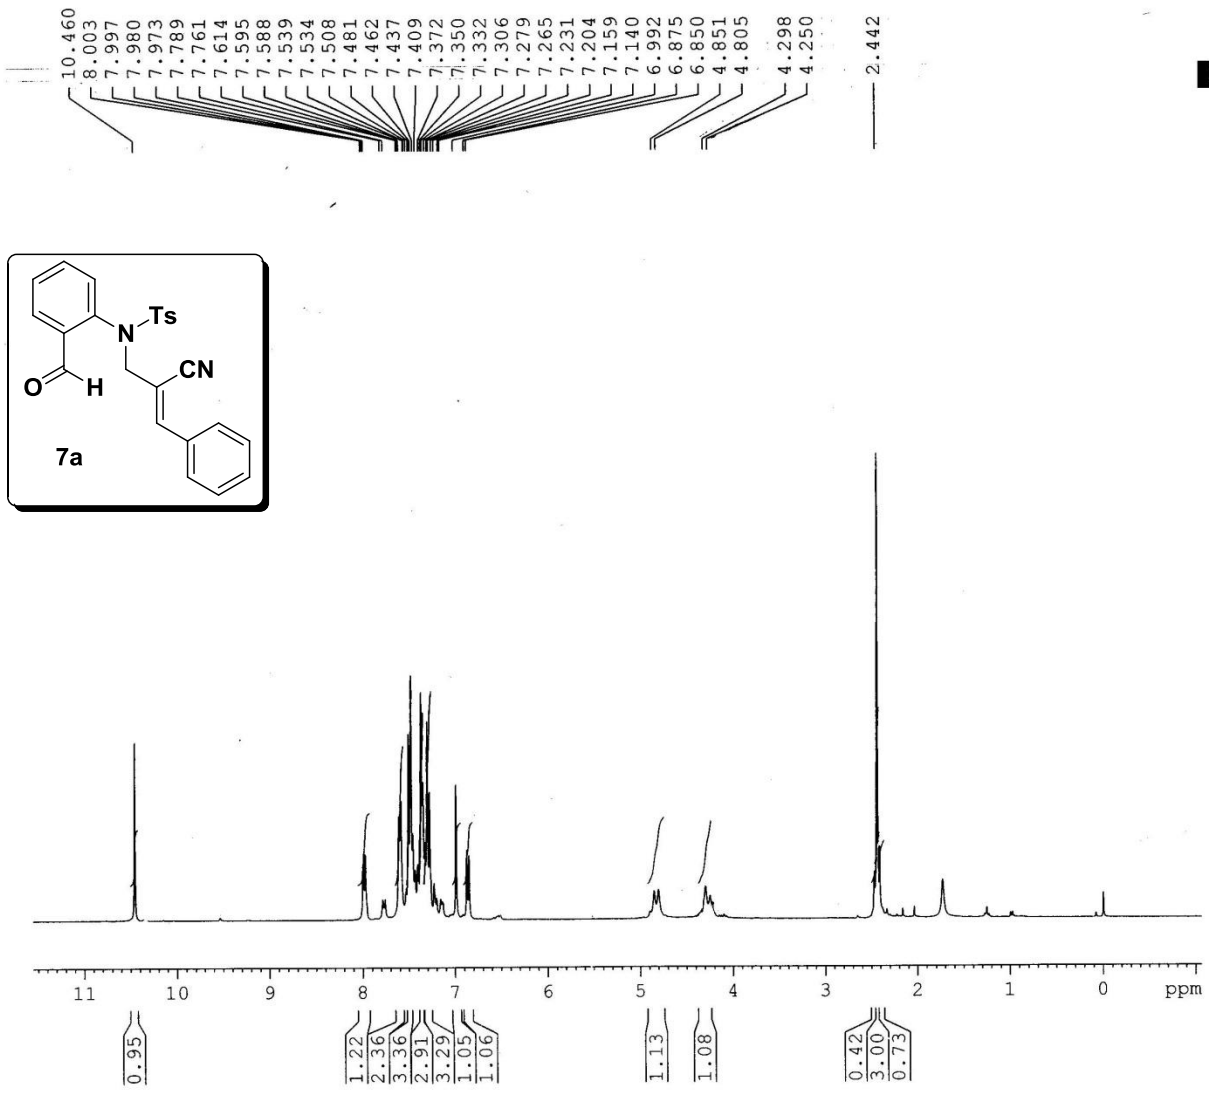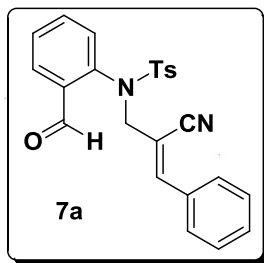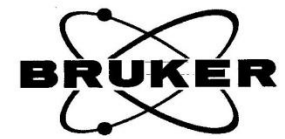

Current Data Parameters  
 NAME DK-V-H-CN-CHO  
 EXPNO 1  
 PROCNO 1

F2 - Acquisition Parameters  
 Date\_ 20100909  
 Time 9.37  
 INSTRUM spect  
 PROBHD 5 mm DUL 13C-1  
 PULPROG zg30  
 TD 65536  
 SOLVENT CDCl3  
 NS 7  
 DS 2  
 SWH 6172.839 Hz  
 FIDRES 0.094190 Hz  
 AQ 5.3084660 sec  
 RG 71.8  
 DW 81.000 usec  
 DE 6.00 usec  
 TE 300.0 K  
 D1 1.00000000 sec  
 TDO 1

----- CHANNEL f1 -----  
 NUC1 1H  
 P1 13.15 usec  
 PL1 0.00 dB  
 SFO1 300.1318534 MHz

F2 - Processing parameters  
 SI 32768  
 SF 300.1300051 MHz  
 WDW EM  
 SSB 0  
 LB 0.30 Hz  
 GB 0  
 PC 1.00

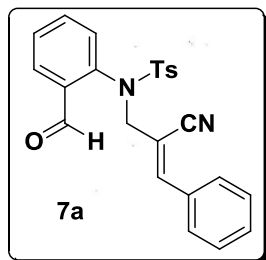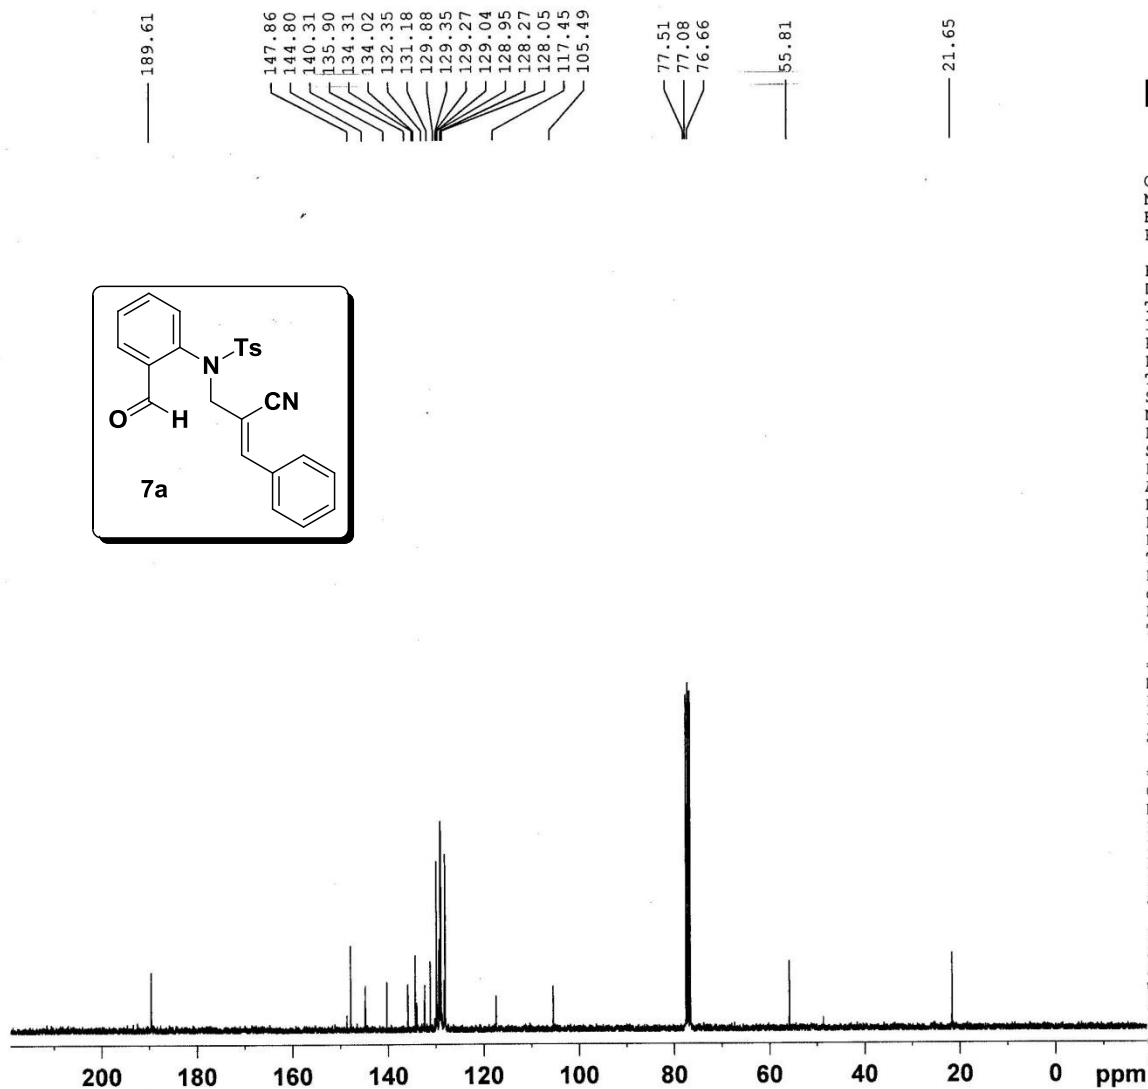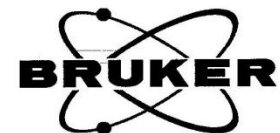

Current Data Parameters  
 NAME DK-V-H-CN-CHO  
 EXPNO 2  
 PROCNO 1

F2 - Acquisition Parameters  
 Date\_ 20100909  
 Time\_ 9.49  
 INSTRUM spect  
 PROBHD 5 mm DUL 13C-1  
 PULPROG zgpg30  
 TD 65536  
 SOLVENT CDCl3  
 NS 176  
 DS 4  
 SWH 17985.611 Hz  
 FIDRES 0.274439 Hz  
 AQ 1.8219508 sec  
 RG 362  
 DW 27.800 usec  
 DE 6.00 usec  
 TE 300.0 K  
 D1 2.00000000 sec  
 d11 0.03000000 sec  
 DELTA 1.89999998 sec  
 TD0 1

===== CHANNEL f1 =====  
 NUC1 13C  
 P1 7.40 usec  
 PL1 -2.00 dB  
 SFO1 75.4752953 MHz

===== CHANNEL f2 =====  
 CPDPRG2 waltz16  
 NUC2 1H  
 PCPD2 80.00 usec  
 PL2 0.00 dB  
 PL12 15.68 dB  
 PL13 16.00 dB  
 SFO2 300.1312005 MHz

F2 - Processing parameters  
 SI 32768  
 SF 75.4677490 MHz  
 WDW EM  
 SSB 0  
 LB 1.00 Hz  
 GB 0  
 PC 1.40

7.946  
7.890  
7.862  
7.743  
7.715  
7.602  
7.573  
7.543  
7.531  
7.515  
7.505  
7.405  
7.400  
7.380  
7.376  
7.351  
7.347  
7.324  
7.294  
7.263  
7.176  
7.150  
7.125  
5.498  
5.328  
5.285  
3.922  
3.880  
2.384

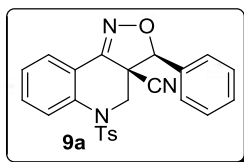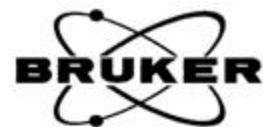

Current Data Parameters  
NAME VV-66  
EXPNO 1  
PROCNO 1

F2 - Acquisition Parameters  
Date\_ 20121204  
Time 23.04  
INSTRUM spect  
PROBHD 5 mm DUL 13C-1  
PULPROG zg30  
TD 65536  
SOLVENT CDCl3  
NS 10  
DS 2  
SWH 6172.839 Hz  
FIDRES 0.094190 Hz  
AQ 5.3084660 sec  
RG 287.4  
DW 81.000 usec  
DE 6.00 usec  
TE 300.0 K  
D1 1.00000000 sec  
TD0 1

----- CHANNEL f1 -----  
NUC1 1H  
P1 13.15 usec  
PL1 0.00 dB  
SFO1 300.1318534 MHz

F2 - Processing parameters  
SI 32768  
SF 300.1300059 MHz  
WDW EM  
SSB 0  
LB 0.30 Hz  
GB 0  
PC 1.00

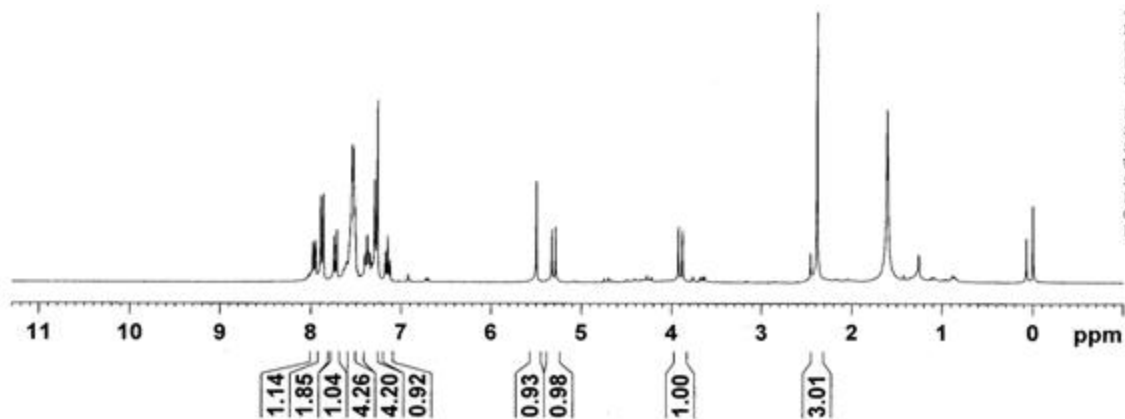

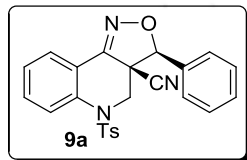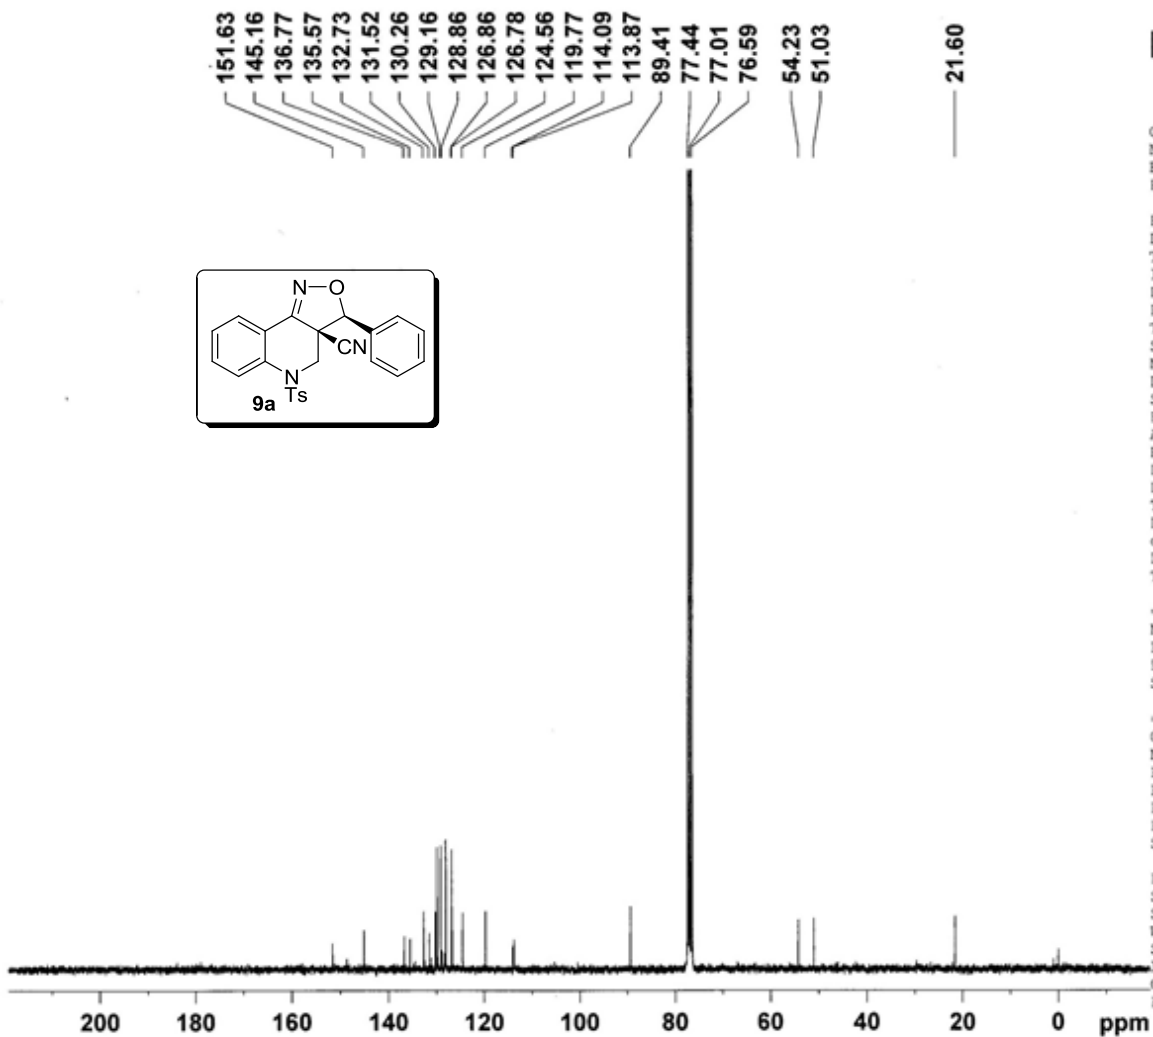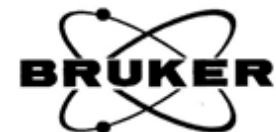

Current Data Parameters  
NAME VV-66F  
EXPNO 1  
PROCNO 1

F2 - Acquisition Parameters  
Date\_ 20130123  
Time 21.35  
INSTRUM spect  
PROBHD 5 mm DUL 13C-1  
PULPROG zgpg30  
TD 65536  
SOLVENT CDCl3  
NS 2653  
DS 4  
SWH 17985.611 Hz  
FIDRES 0.274439 Hz  
AQ 1.8219508 sec  
RG 912.3  
DW 27.800 usec  
DE 6.00 usec  
TE 300.0 K  
D1 2.0000000 sec  
d11 0.0300000 sec  
DELTA 1.89999998 sec  
TDO 1

----- CHANNEL f1 -----  
NUC1 13C  
P1 9.30 usec  
PL1 0.00 dB  
SFO1 75.4752953 MHz

----- CHANNEL f2 -----  
CPDPRG2 waltz16  
NUC2 1H  
PCPD2 80.00 usec  
PL2 0.00 dB  
PL12 15.68 dB  
PL13 16.00 dB  
SFO2 300.1312005 MHz

F2 - Processing parameters  
SI 32768  
SF 75.4677490 MHz  
WDW EM  
SSB 0  
LB 1.00 Hz  
GB 0  
PC 1.40

|               |           |             |                      |                 |                |                        |                     |
|---------------|-----------|-------------|----------------------|-----------------|----------------|------------------------|---------------------|
| Sample Name   | WV-66-F   | Position    |                      | Instrument Name | Q-TOF          | User Name              | QTOF-PU\admin       |
| Inj Vol       | -1        | InjPosition |                      | SampleType      | Sample         | IRM Calibration Status | Success             |
| Data Filename | WV-66-F.d | ACQ Method  | Pondicherry Universi | Comment         | MM-MB-429.1147 | Acquired Time          | 18-11-2014 15:00:55 |

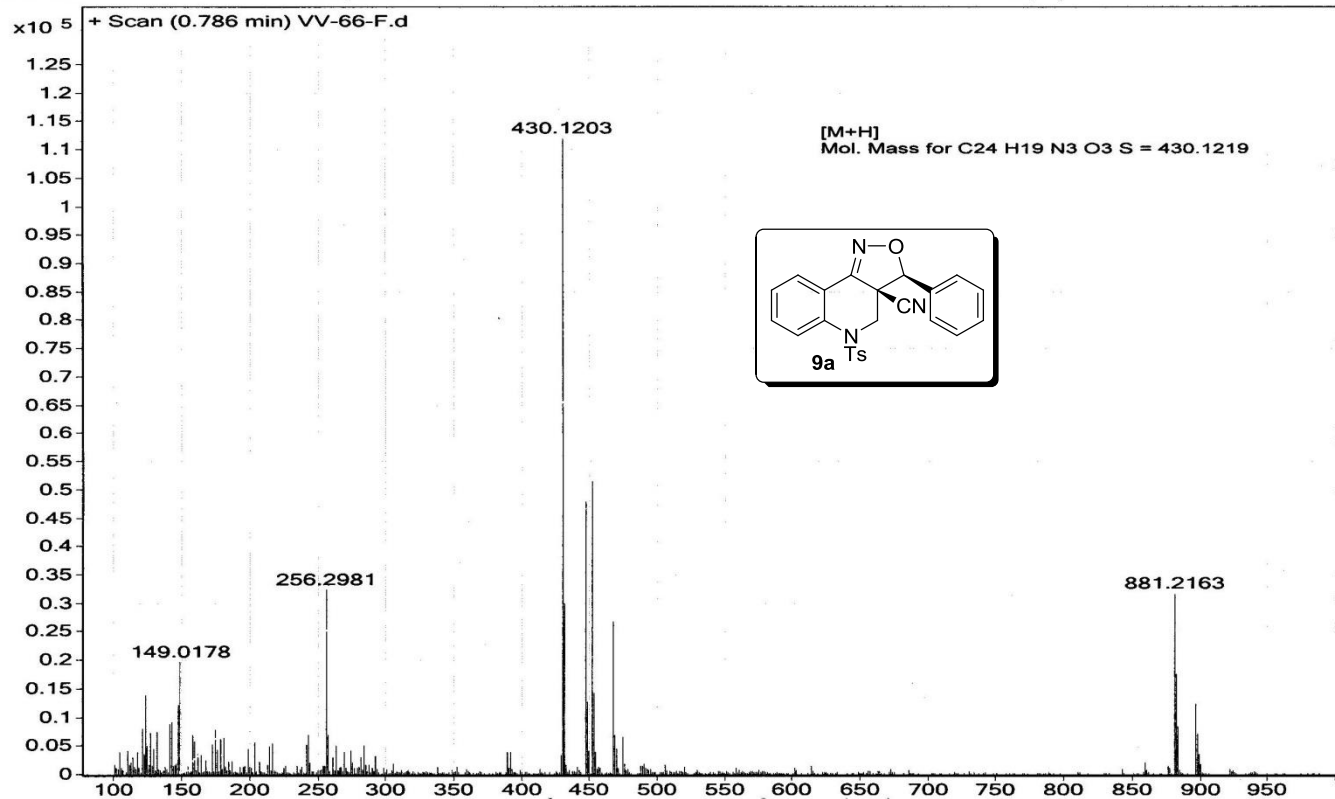



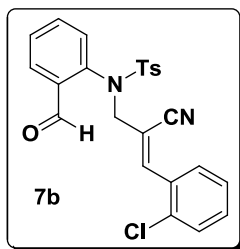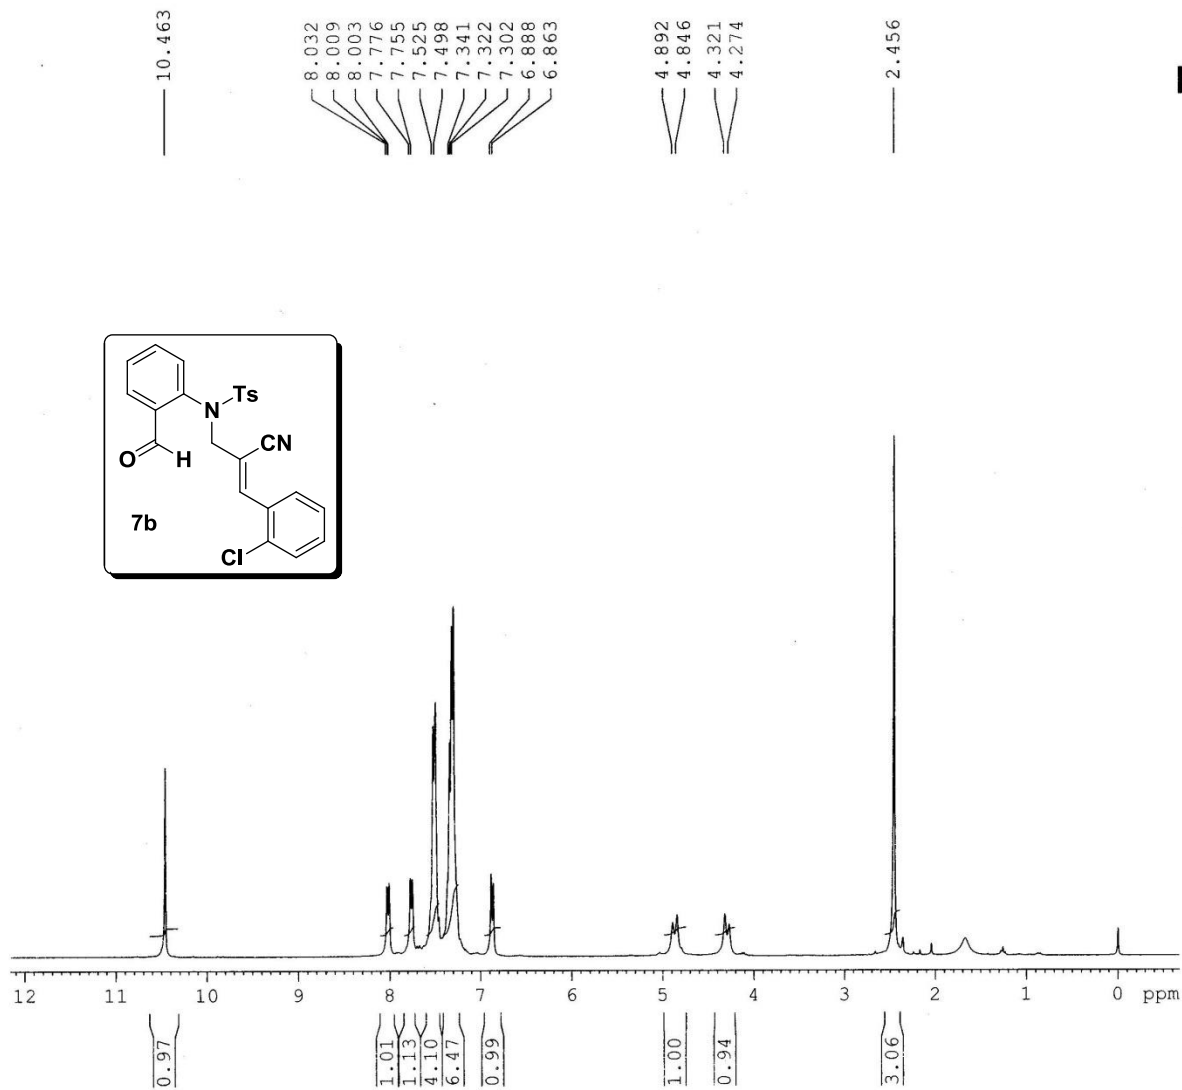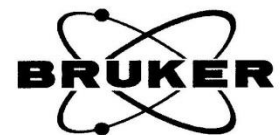

Current Data Parameters  
 NAME DK-V-2-Cl-Est C W  
 EXPNO 1  
 PROCNO 1

F2 - Acquisition Parameters  
 Date\_ 20100910  
 Time\_ 16.26  
 INSTRUM spect  
 PROBHD 5 mm DUL 13C-1  
 PULPROG zg30  
 TD 65536  
 SOLVENT CDCl3  
 NS 16  
 DS 2  
 SWH 6172.839 Hz  
 FIDRES 0.094190 Hz  
 AQ 5.3084660 sec  
 RG 143.7  
 LW 81.000 usec  
 DE 6.00 usec  
 TE 300.0 K  
 D1 1.00000000 sec  
 TDO 1

----- CHANNEL f1 -----  
 NUCL1 1H  
 P1 13.15 usec  
 PL1 0.00 dB  
 SFO1 300.1318534 MHz

F2 - Processing parameters  
 SI 32768  
 SF 300.1300049 MHz  
 WDW EM  
 SSB 0  
 LB 0.30 Hz  
 GB 0  
 PC 1.00

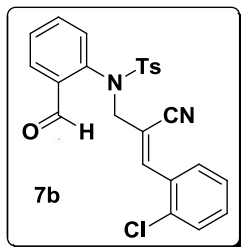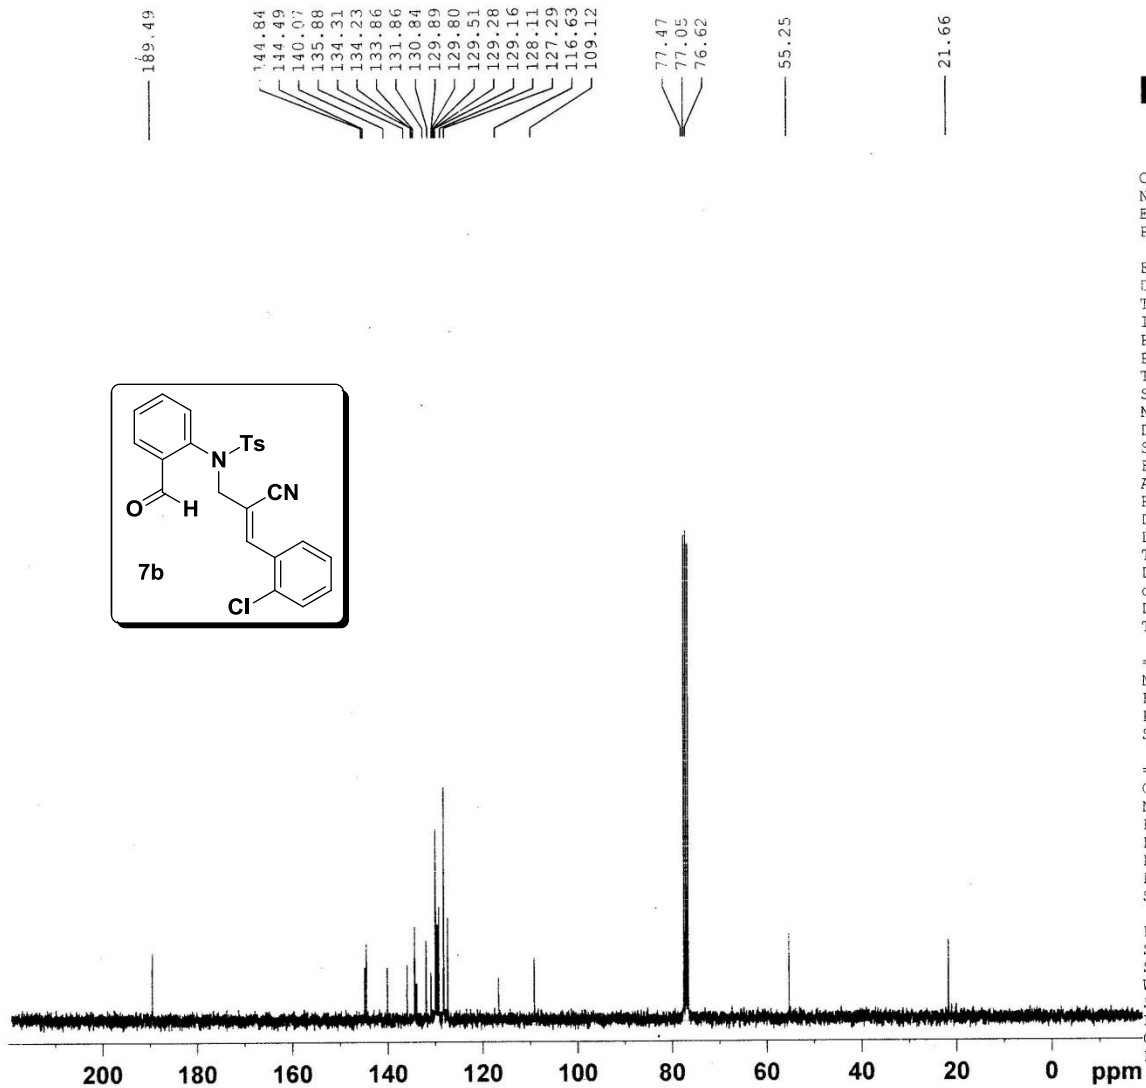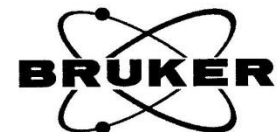

Current Data Parameters  
 NAME DK-V-2-Cl-~~Set~~ **CN**  
 EXPNO 2  
 PROCNO 1

F2 - Acquisition Parameters  
 Date\_ 20100910  
 Time 16.33  
 INSTRUM spect  
 PROBHD 5 mm DUL 13C-1  
 PULPROG zgpg30  
 TD 65536  
 SOLVENT CDCl3  
 NS 194  
 DS 4  
 SWH 17985.611 Hz  
 FIDRES 0.274439 Hz  
 AQ 1.8219508 sec  
 RG 362  
 DW 27.800 usec  
 DE 6.00 usec  
 TE 300.0 K  
 D1 2.00000000 sec  
 d11 0.03000000 sec  
 DELTA 1.89999998 sec  
 TDO 1

===== CHANNEL f1 =====  
 NUC1 13C  
 P1 7.40 usec  
 PL1 -2.00 dB  
 SFO1 75.4752953 MHz

===== CHANNEL f2 =====  
 CPDPRG2 waltz16  
 NUC2 1H  
 PCPD2 80.00 usec  
 PL2 0.00 dB  
 PL12 15.68 dB  
 PL13 16.00 dB  
 SFO2 300.1312005 MHz

F2 - Processing parameters  
 SI 32768  
 SF 75.4677490 MHz  
 WDW EM  
 SSB 0  
 LB 1.00 Hz  
 GB 0  
 PC 1.40

7.939  
7.915  
7.816  
7.789  
7.573  
7.545  
7.450  
7.425  
7.255  
7.233  
7.205  
7.191  
7.078  
7.053  
7.028  
6.498  
5.123  
5.080

2.788  
2.744  
2.320

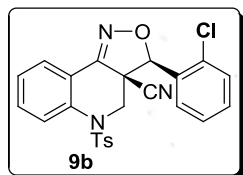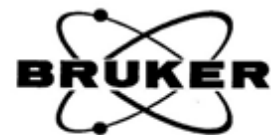

Current Data Parameters  
NAME VV-77  
EXPNO 1  
PROCNO 1

F2 - Acquisition Parameters  
Date\_ 20130409  
Time 19.50  
INSTRUM spect  
PROBHD 5 mm DUL 13C-1  
PULPROG zg30  
TD 65536  
SOLVENT CDCl3  
NS 16  
DS 2  
SWH 6172.839 Hz  
FIDRES 0.094190 Hz  
AQ 5.3084660 sec  
RG 143.7  
DW 81.000 usec  
DE 6.00 usec  
TE 300.0 K  
D1 1.00000000 sec  
TDD 1

===== CHANNEL f1 =====  
NUC1 1H  
P1 13.15 usec  
PL1 0.00 dB  
SFO1 300.1318534 MHz

F2 - Processing parameters  
SI 32768  
SF 300.1300279 MHz  
WDW EM  
SSB 0  
LB 0.30 Hz  
GB 0  
PC 1.00

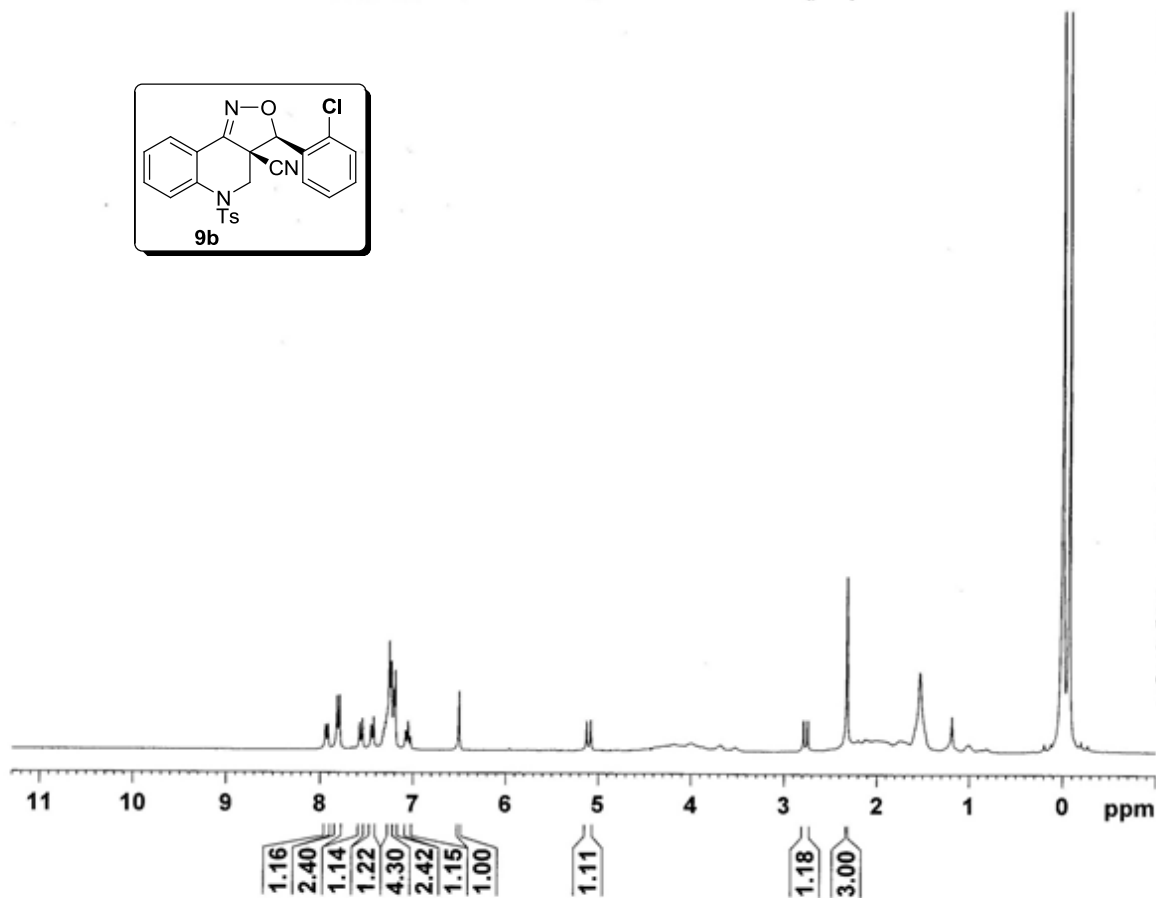

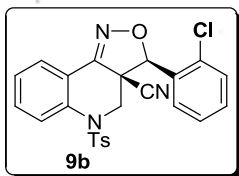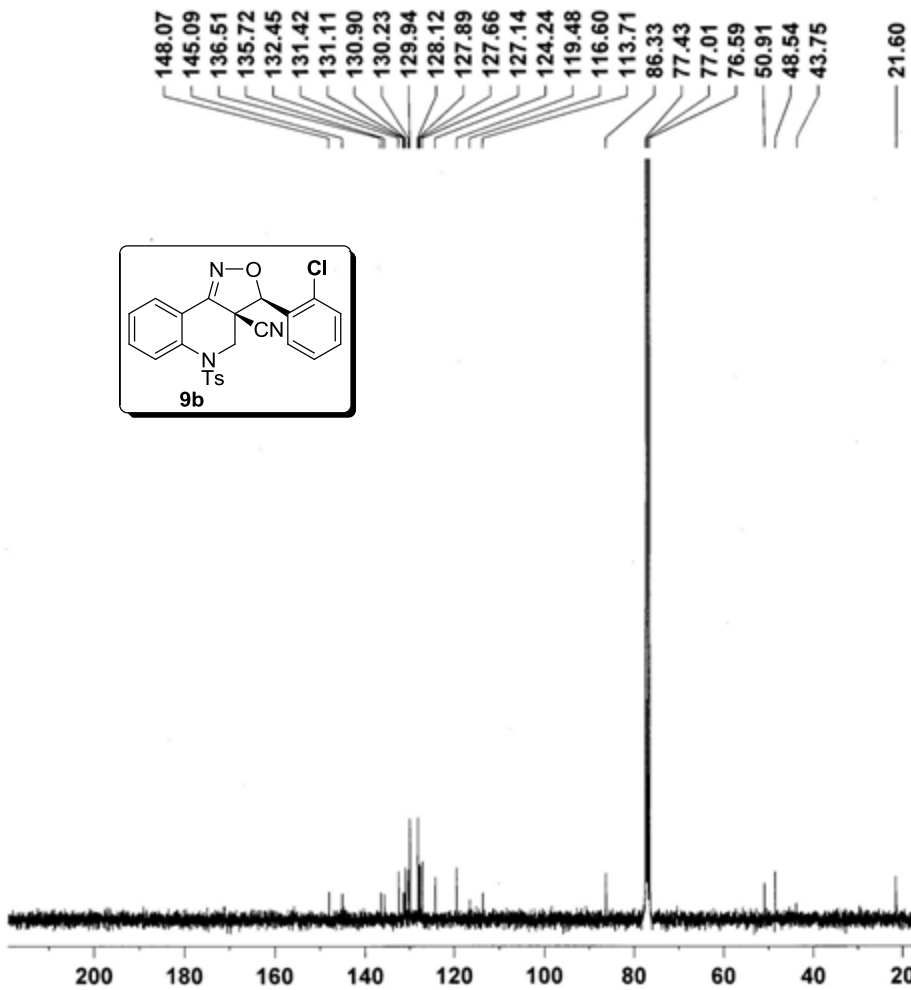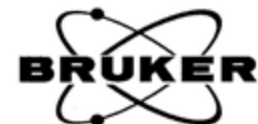

Current Data Parameters  
NAME VV-77  
EXPNO 2  
PROCNO 1

F2 - Acquisition Parameters  
Date\_ 20130409  
Time\_ 20.04  
INSTRUM spect  
PROBHD 5 mm DUL 13C-1  
PULPROG zgpg30  
TD 65536  
SOLVENT CDCl3  
NS 700  
DS 4  
SWH 17985.611 Hz  
FIDRES 0.274439 Hz  
AQ 1.8219508 sec  
RG 1625.5  
DW 27.800 usec  
DE 6.00 usec  
TE 300.0 K  
D1 2.00000000 sec  
d11 0.03000000 sec  
DELTA 1.89999998 sec  
TDO 1

----- CHANNEL f1 -----  
NUC1 13C  
P1 9.30 usec  
PL1 0.00 dB  
SFO1 75.4752953 MHz

----- CHANNEL f2 -----  
CPDPRG2 waltz16  
NUC2 1H  
PCPD2 80.00 usec  
PL2 0.00 dB  
PL12 15.68 dB  
PL13 16.00 dB  
SFO2 300.1312005 MHz

F2 - Processing parameters  
SI 32768  
SF 75.4677491 MHz  
WDW EM  
SSB 0  
LB 1.00 Hz  
GB 0  
PC 1.40

|               |          |             |                      |                 |                 |                        |                     |
|---------------|----------|-------------|----------------------|-----------------|-----------------|------------------------|---------------------|
| Sample Name   | MM-77F   | Position    |                      | Instrument Name | Q-TOF           | User Name              | QTOF-PU\admin       |
| Inj Vol       | -1       | InjPosition |                      | SampleType      | Sample          | IRM Calibration Status | Success             |
| Data Filename | MM-77F.d | ACQ Method  | Pondicherry Universi | Comment         | MSK-MB-463.0757 | Acquired Time          | 05-06-2015 13:23:15 |

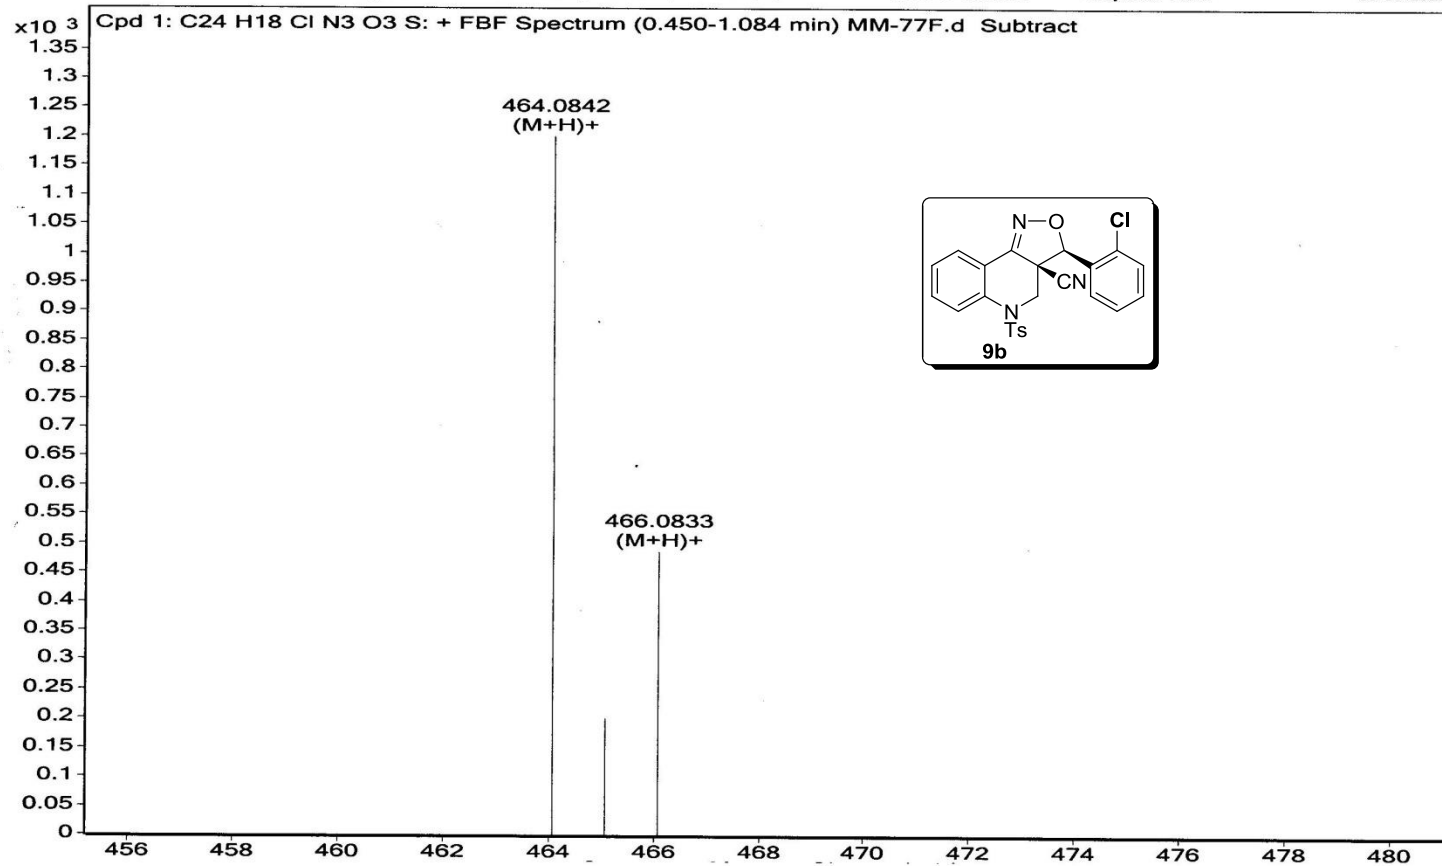

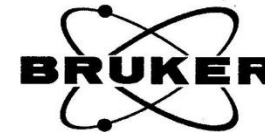

Current Data Parameters  
NAME DK-V-4-Cl-CN-CHO  
EXPNO 1  
PROCNO 1

F2 - Acquisition Parameters  
Date\_ 20100909  
Time 10.13  
INSTRUM spect  
PROBHD 5 mm DUL 13C-1  
PULPROG zg30  
TD 65536  
SOLVENT CDCl3  
NS 16  
DS 2  
SWH 6172.839 Hz  
FIDRES 0.094190 Hz  
AQ 5.3084660 sec  
RG 101.6  
DW 81.000 usec  
DE 6.00 usec  
TE 300.0 K  
D1 1.0000000 sec  
TDO 1

===== CHANNEL f1 =====  
NUC1 1H  
P1 13.15 usec  
PL1 0.00 dB  
SFO1 300.1318534 MHz

F2 - Processing parameters  
SI 32768  
SF 300.1300042 MHz  
WDW EM  
SSB 0  
LB 0.30 Hz  
GB 0  
PC 1.00

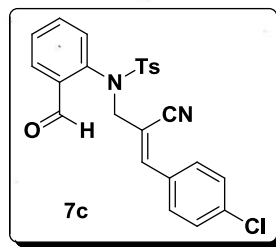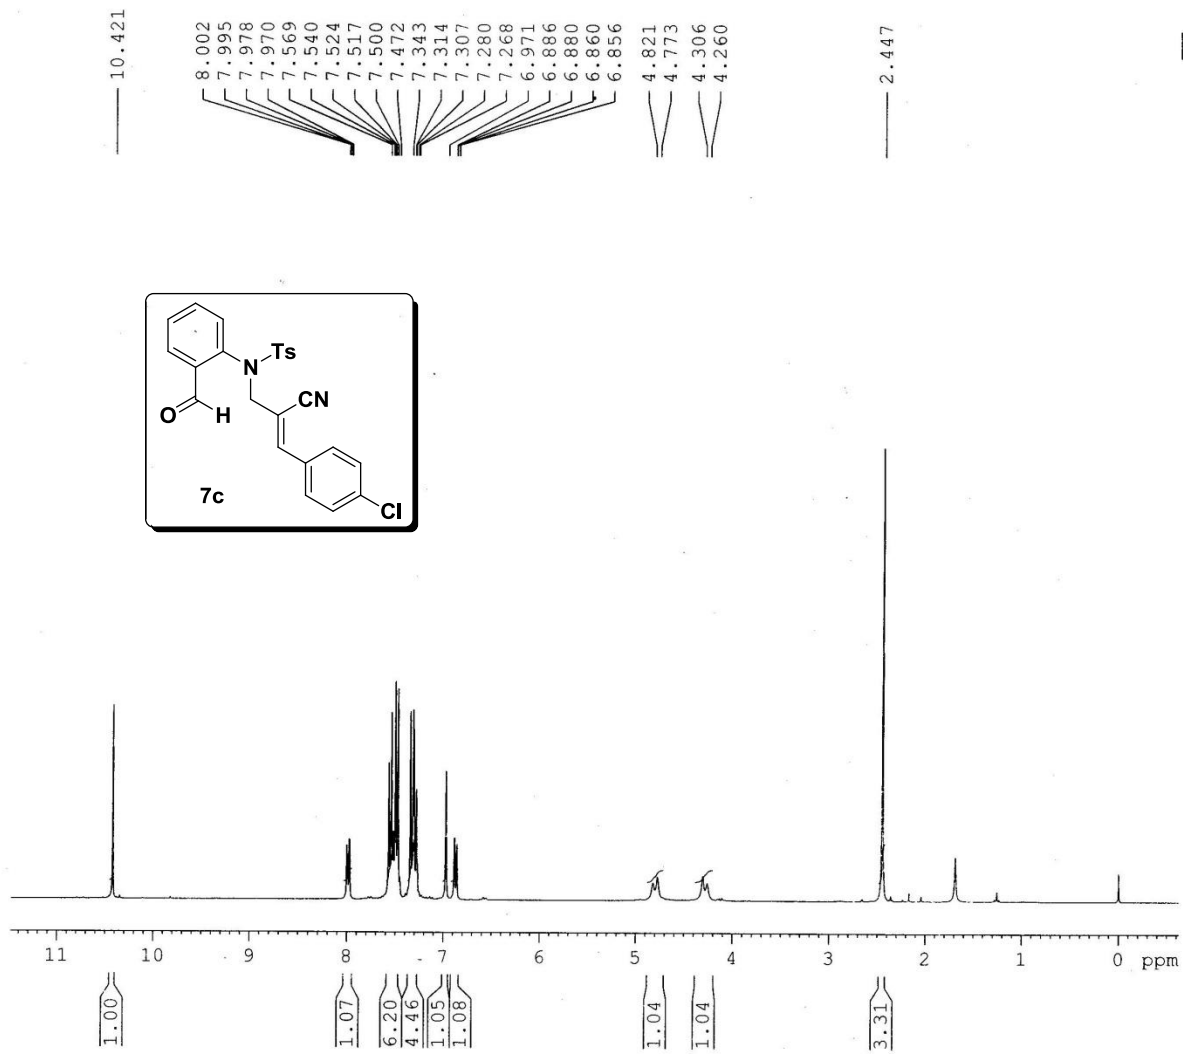

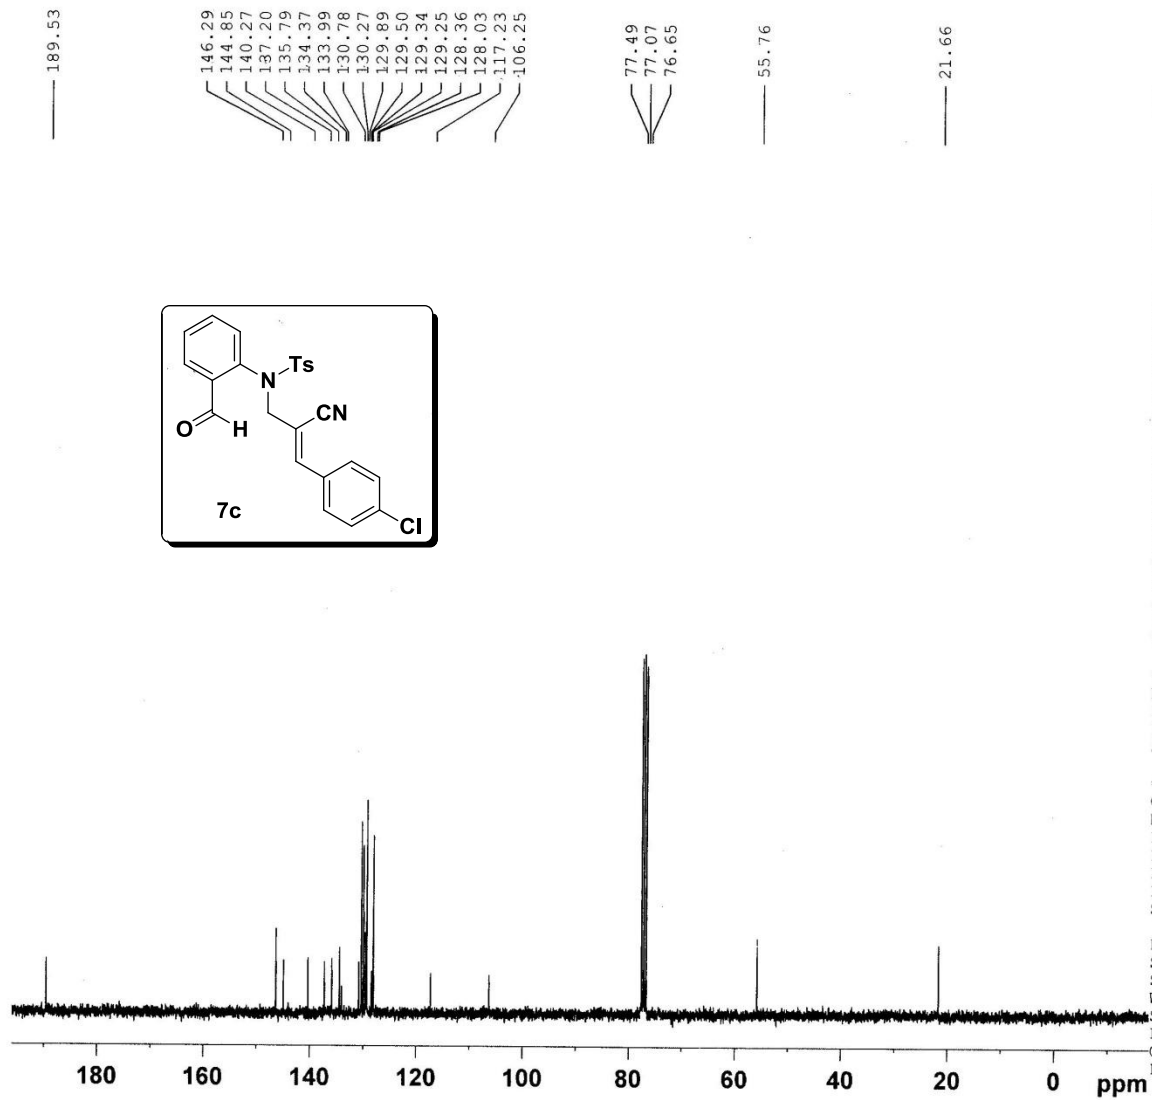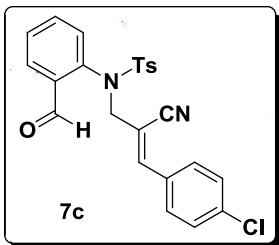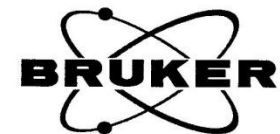

Current Data Parameters  
 NAME DK-V-4-Cl-CN-CHO  
 EXPNO 2  
 PROCNO 1

F2 - Acquisition Parameters  
 Date\_ 20100909  
 Time 10.24  
 INSTRUM spect  
 PROBHD 5 mm DUL 13C-1  
 PULPROG zgpg30  
 TD 65536  
 SOLVENT CDCl3  
 NS 72  
 DS 4  
 SWH 17985.611 Hz  
 FIDRES 0.274439 Hz  
 AQ 1.8219508 sec  
 RG 362  
 DW 27.800 usec  
 DE 6.00 usec  
 TE 300.0 K  
 D1 2.00000000 sec  
 d11 0.03000000 sec  
 DELTA 1.89999998 sec  
 TD0 1

===== CHANNEL f1 =====  
 NUC1 13C  
 P1 7.40 usec  
 PL1 -2.00 dB  
 SFO1 75.4752953 MHz

===== CHANNEL f2 =====  
 CPDPRG2 waltz16  
 NUC2 1H  
 PCPD2 80.00 usec  
 PL2 0.00 dB  
 PL12 15.68 dB  
 PL13 16.00 dB  
 SFO2 300.1312005 MHz

F2 - Processing parameters  
 SI 32768  
 SF 75.4677490 MHz  
 WDW EM  
 SSB 0  
 LB 1.00 Hz  
 GB 0  
 PC 1.40

7.948  
7.922  
7.891  
7.866  
7.810  
7.783  
7.674  
7.645  
7.517  
7.490  
7.430  
7.313  
7.285  
7.255  
7.228  
7.191  
7.107  
7.082  
7.057  
5.400  
5.235  
5.193  
3.839  
3.796

2.318

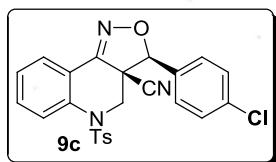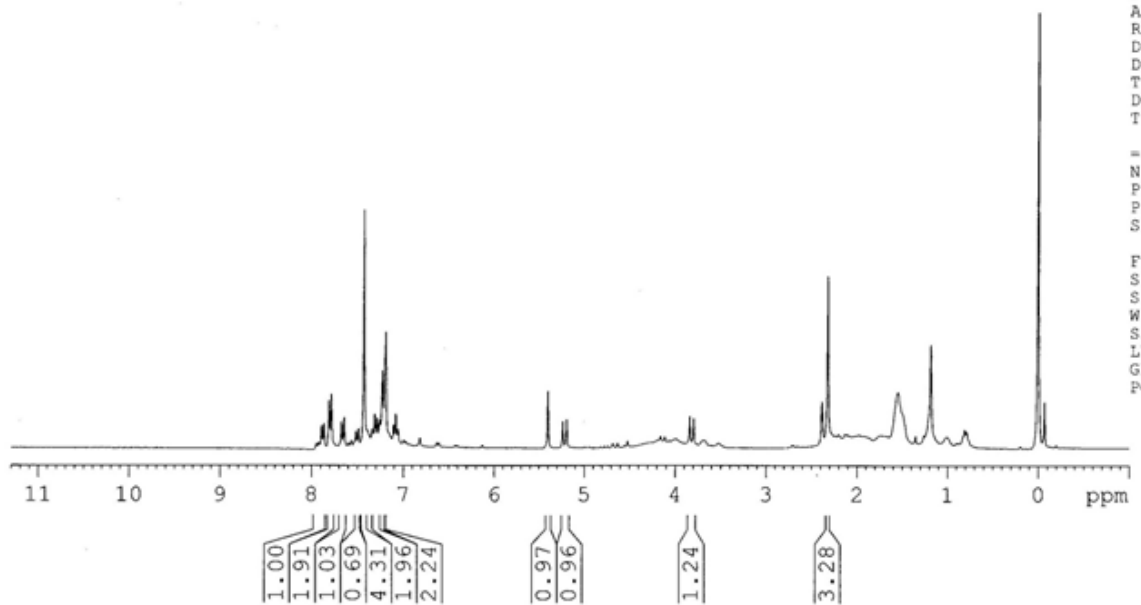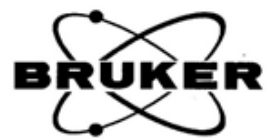

Current Data Parameters  
NAME VV-75F  
EXPNO 1  
PROCNO 1

F2 - Acquisition Parameters  
Date\_ 20130313  
Time 18.32  
INSTRUM spect  
PROBHD 5 mm DUL 13C-1  
PULPROG zg30  
TD 65536  
SOLVENT CDCl3  
NS 16  
DS 2  
SWH 6172.839 Hz  
FIDRES 0.094190 Hz  
AQ 5.3084660 sec  
RG 161.3  
DW 81.000 usec  
DE 6.00 usec  
TE 300.0 K  
D1 1.00000000 sec  
TD0 1

----- CHANNEL f1 -----  
NUC1 1H  
P1 13.15 usec  
PL1 0.00 dB  
SFO1 300.1318534 MHz

F2 - Processing parameters  
SI 32768  
SF 300.1300276 MHz  
WDW EM  
SSB 0  
LB 0.30 Hz  
GB 0  
PC 1.00



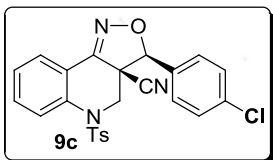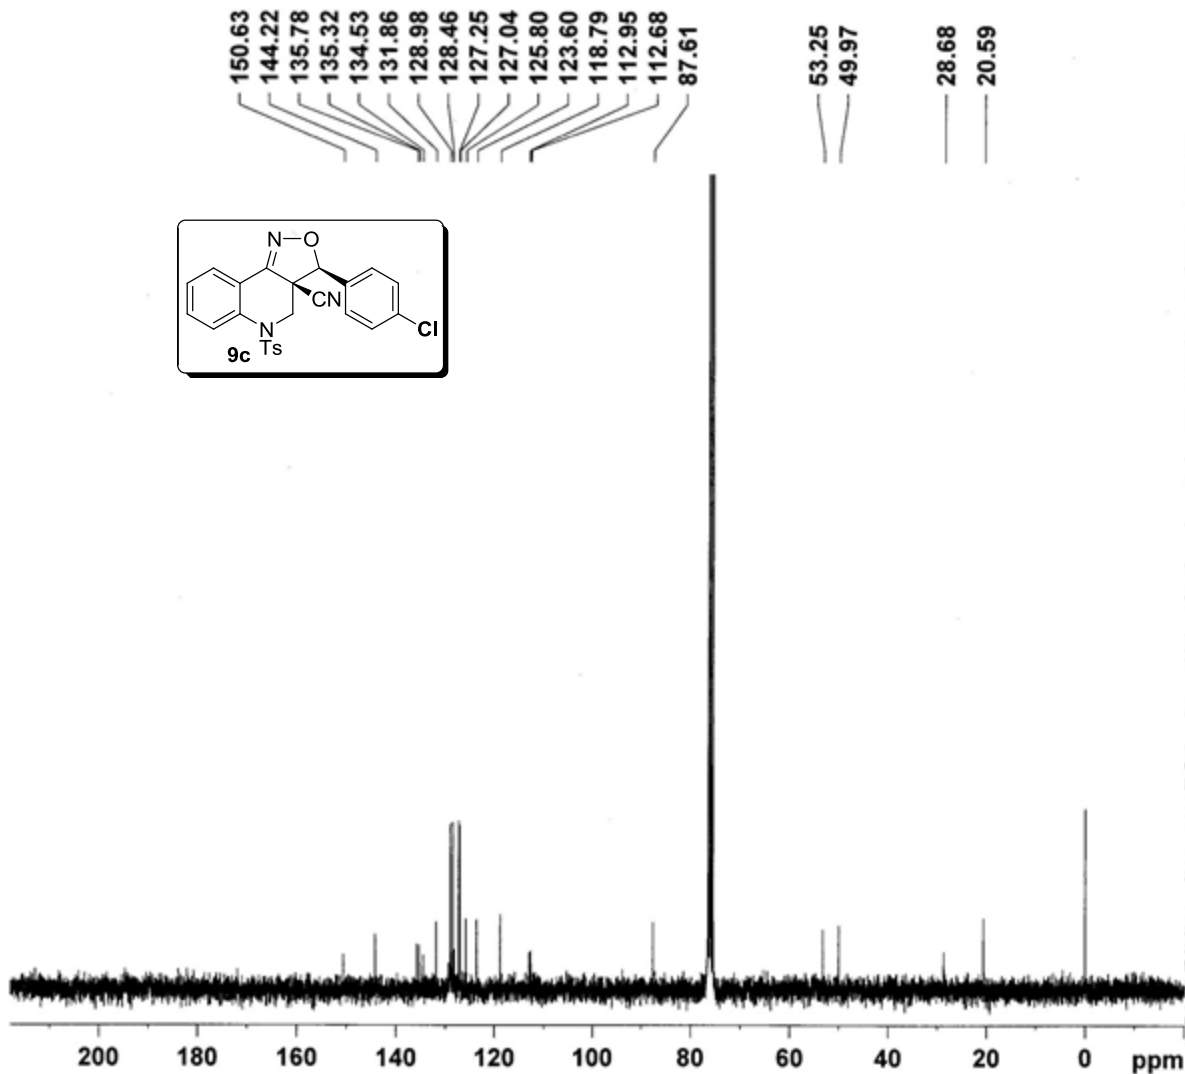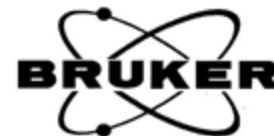

Current Data Parameters  
NAME VV-75F  
EXPNO 2  
PROCNO 1

F2 - Acquisition Parameters  
Date\_ 20130313  
Time\_ 18.52  
INSTRUM spect  
PROBHD 5 mm DUL 13C-1  
PULPROG zgpg30  
TD 65536  
SOLVENT CDCl3  
NS 719  
DS 4  
SWH 17985.611 Hz  
FIDRES 0.274439 Hz  
AQ 1.8219508 sec  
RG 2896.3  
DW 27.800 usec  
DE 6.00 usec  
TE 300.0 K  
D1 2.0000000 sec  
d11 0.0300000 sec  
DELTA 1.89999998 sec  
TDO 1

===== CHANNEL f1 =====  
NUC1 13C  
P1 9.30 usec  
PL1 0.00 dB  
SFO1 75.4752953 MHz

===== CHANNEL f2 =====  
CPDPRG2 waltz16  
NUC2 1H  
PCPD2 80.00 usec  
PL2 0.00 dB  
PL12 15.68 dB  
PL13 16.00 dB  
SFO2 300.1312005 MHz

F2 - Processing parameters  
SI 32768  
SF 75.4678256 MHz  
WDW EM  
SSB 0  
LB 1.00 Hz  
GB 0  
PC 1.40

|               |          |             |                      |                 |                 |                        |                     |
|---------------|----------|-------------|----------------------|-----------------|-----------------|------------------------|---------------------|
| Sample Name   | MM-75F   | Position    |                      | Instrument Name | Q-TOF           | User Name              | QTOF-PU\admin       |
| Inj Vol       | -1       | InjPosition |                      | SampleType      | Sample          | IRM Calibration Status | Success             |
| Data Filename | MM-75F.d | ACQ Method  | Pondicherry Universi | Comment         | MSK-MB-463.0758 | Acquired Time          | 05-06-2015 13:40:22 |

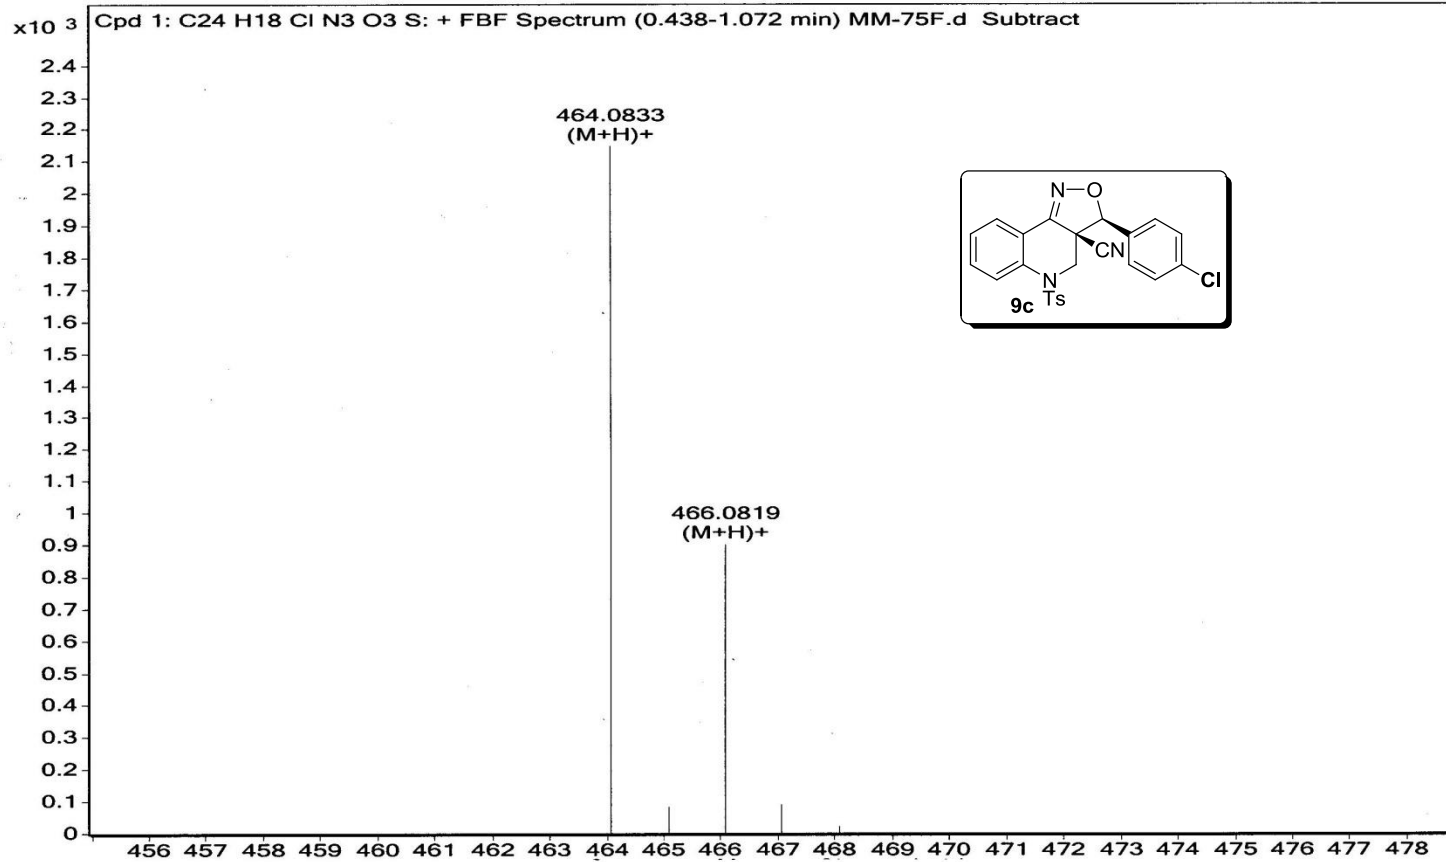

10.405  
8.000  
7.978  
7.783  
7.758  
7.698  
7.671  
7.602  
7.577  
7.513  
7.489  
7.449  
7.399  
7.303  
7.283  
7.266  
7.226  
7.185  
7.160  
7.034  
7.008  
6.884  
6.867  
6.834  
6.783  
6.756  
5.990  
4.796  
4.751  
4.272  
4.227  
2.450

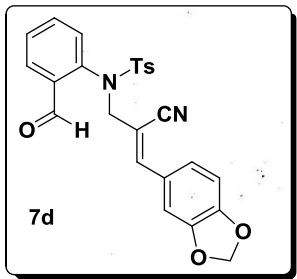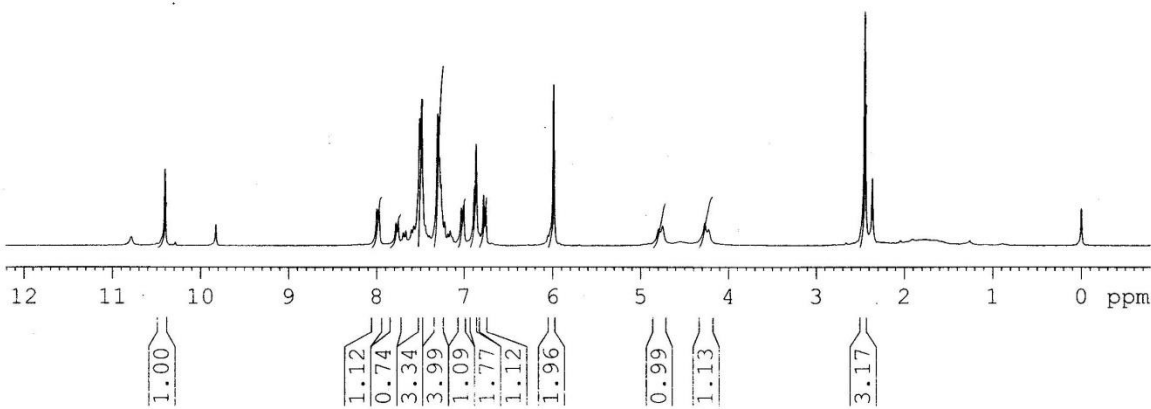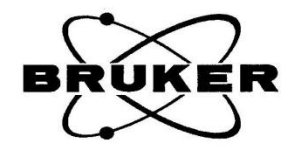

Current Data Parameters  
NAME DK-V-PIP-CN-Ts-PYZ  
EXPNO 3  
PROCNO 1

F2 - Acquisition Parameters  
Date\_ 20111210  
Time\_ 17.50  
INSTRUM spect  
PROBHD 5 mm DUL 13C-1  
PULPROG zg30  
TD 65536  
SOLVENT CDC13  
NS 5  
DS 2  
SWH 6172.839 Hz  
FIDRES 0.094190 Hz  
AQ 5.3084660 sec  
RG 143.7  
DW 81.000 usec  
DE 6.00 usec  
TE 300.0 K  
D1 1.0000000 sec  
TDO 1

===== CHANNEL f1 =====  
NUC1 1H  
P1 13.15 usec  
PL1 0.00 dB  
SFO1 300.1318534 MHz

F2 - Processing parameters  
SI 32768  
SF 300.1300050 MHz  
WDW EM  
SSB 0  
LB 0.30 Hz  
GB 0  
PC 1.00

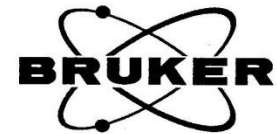

Current Data Parameters  
NAME DK-V-PIP-CN-Ts-PYZ  
EXPNO 2  
PROCNO 1

F2 - Acquisition Parameters  
Date\_ 20111210  
Time\_ 17.49  
INSTRUM spect  
PROBHD 5 mm DUL 13C-1  
PULPROG zgpg30  
TD 65536  
SOLVENT CDCl3  
NS 500  
DS 4  
SWH 17985.611 Hz  
FIDRES 0.274439 Hz  
AQ 1.8219508 sec  
RG 20642.5  
DW 27.800 usec  
DE 6.00 usec  
TE 300.0 K  
D1 2.00000000 sec  
d11 0.03000000 sec  
DELTA 1.899999998 sec  
TD0 1

===== CHANNEL f1 =====  
NUC1 13C  
P1 9.30 usec  
PL1 0.00 dB  
SFO1 75.4752953 MHz

===== CHANNEL f2 =====  
CPDPRG2 waltz16  
NUC2 1H  
PCPD2 80.00 usec  
PL2 0.00 dB  
PL12 15.68 dB  
PL13 16.00 dB  
SFO2 300.1312005 MHz

F2 - Processing parameters  
SI 32768  
SF 75.4677490 MHz  
WDW EM  
SSB 0  
LB 1.00 Hz  
GB 0  
PC 1.40

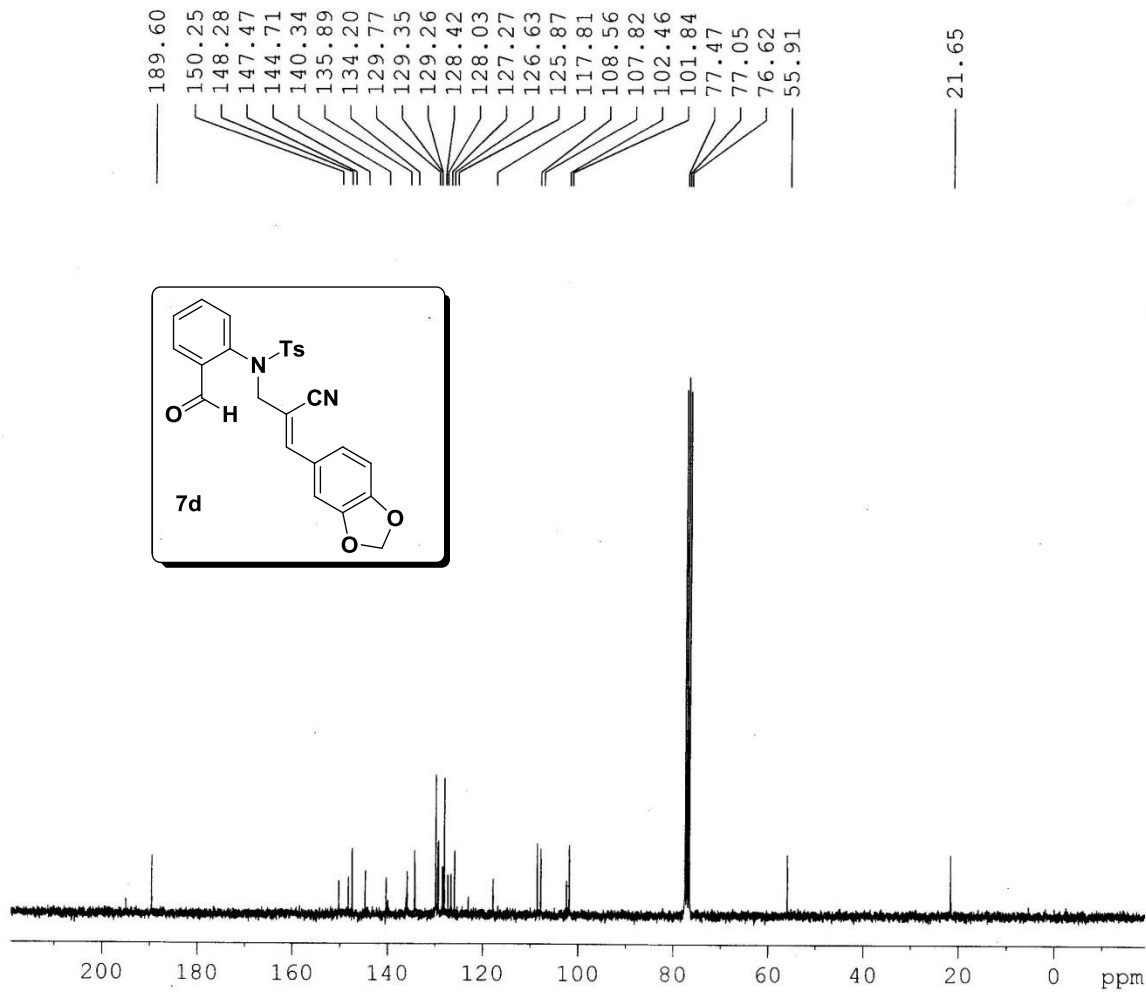

7.892  
7.867  
7.825  
7.799  
7.678  
7.649  
7.331  
7.306  
7.283  
7.232  
7.192  
7.103  
7.078  
7.053  
7.012  
6.926  
6.899  
6.863  
6.837  
5.987  
5.334  
5.222  
5.180  
3.888  
3.801  
3.758  
2.323

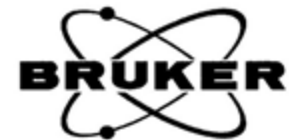

Current Data Parameters  
NAME VV-60F  
EXPNO 2  
PROCNO 1

F2 - Acquisition Parameters  
Date\_ 20150420  
Time\_ 9.10  
INSTRUM spect  
PROBHD 5 mm DUL 13C-1  
PULPROG zg30  
TD 65536  
SOLVENT CDCl3  
NS 25  
DS 2  
SWH 6172.839 Hz  
FIDRES 0.094190 Hz  
AQ 5.3084660 sec  
RG 512  
DW 81.000 usec  
DE 6.00 usec  
TE 300.0 K  
D1 1.00000000 sec  
TDO 1

===== CHANNEL f1 =====  
NUC1 1H  
P1 13.15 usec  
PL1 0.00 dB  
SFO1 300.1318534 MHz

F2 - Processing parameters  
SI 32768  
SF 300.1300274 MHz  
WDW EM  
SSB 0  
LB 0.30 Hz  
GB 0  
PC 1.00

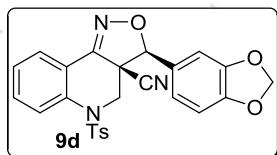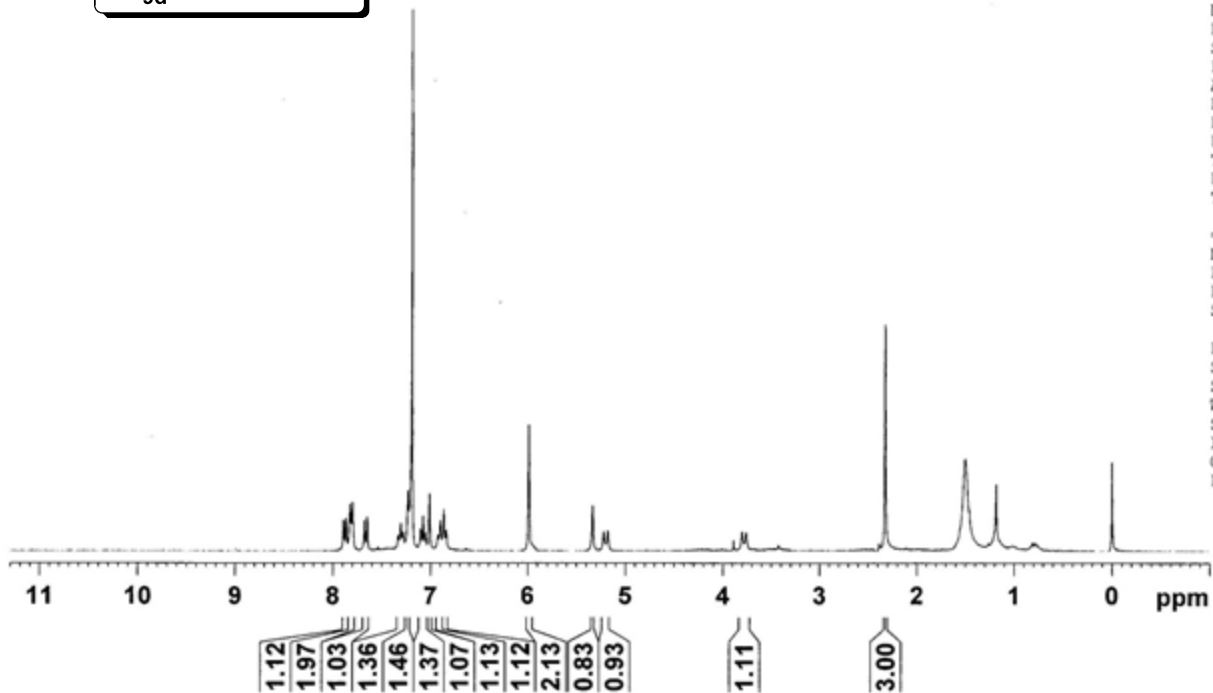

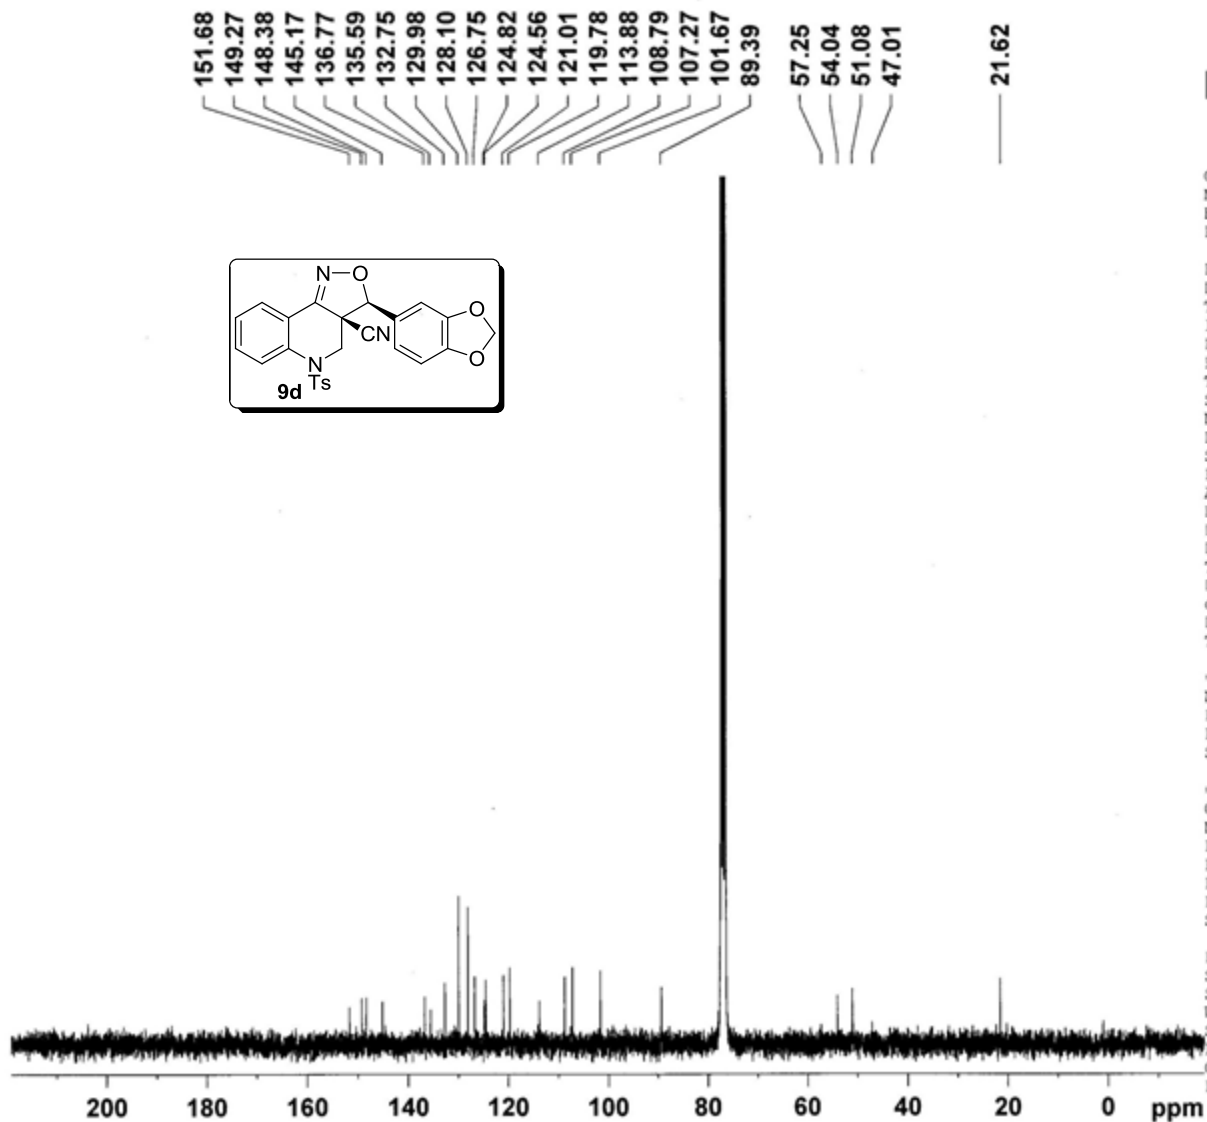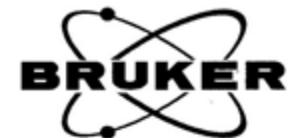

Current Data Parameters  
 NAME VV-60F  
 EXPNO 1  
 PROCNO 1

F2 - Acquisition Parameters  
 Date\_ 20150420  
 Time 8.56  
 INSTRUM spect  
 PROBHD 5 mm DUL 13C-1  
 PULPROG zgpg30  
 TD 65536  
 SOLVENT CDCl3  
 NS 9615  
 DS 4  
 SWH 17985.611 Hz  
 FIDRES 0.274439 Hz  
 AQ 1.8219508 sec  
 RG 1290.2  
 DW 27.800 usec  
 DE 6.00 usec  
 TE 300.0 K  
 D1 2.00000000 sec  
 d11 0.03000000 sec  
 DELTA 1.89999998 sec  
 TDO 1

----- CHANNEL f1 -----  
 NUC1 13C  
 P1 9.30 usec  
 PL1 0.00 dB  
 SFO1 75.4752953 MHz

----- CHANNEL f2 -----  
 CPDPRG2 waltz16  
 NUC2 1H  
 PCPD2 80.00 usec  
 PL2 0.00 dB  
 PL12 15.68 dB  
 PL13 16.00 dB  
 SFO2 300.1312005 MHz

F2 - Processing parameters  
 SI 32768  
 SF 75.4677490 MHz  
 WDW EM  
 SSB 0  
 LB 1.00 Hz  
 GB 0  
 PC 1.40

|               |           |             |                      |                 |                 |                        |                     |
|---------------|-----------|-------------|----------------------|-----------------|-----------------|------------------------|---------------------|
| Sample Name   | MM-60F    | Position    |                      | Instrument Name | Q-TOF           | User Name              | QTOF-PU\admin       |
| Inj Vol       | -1        | InjPosition |                      | SampleType      | Sample          | IRM Calibration Status | Success             |
| Data Filename | MM-60Fn.d | ACQ Method  | Pondicherry Universi | Comment         | MSK-MB-473.1045 | Acquired Time          | 05-06-2015 12:26:32 |

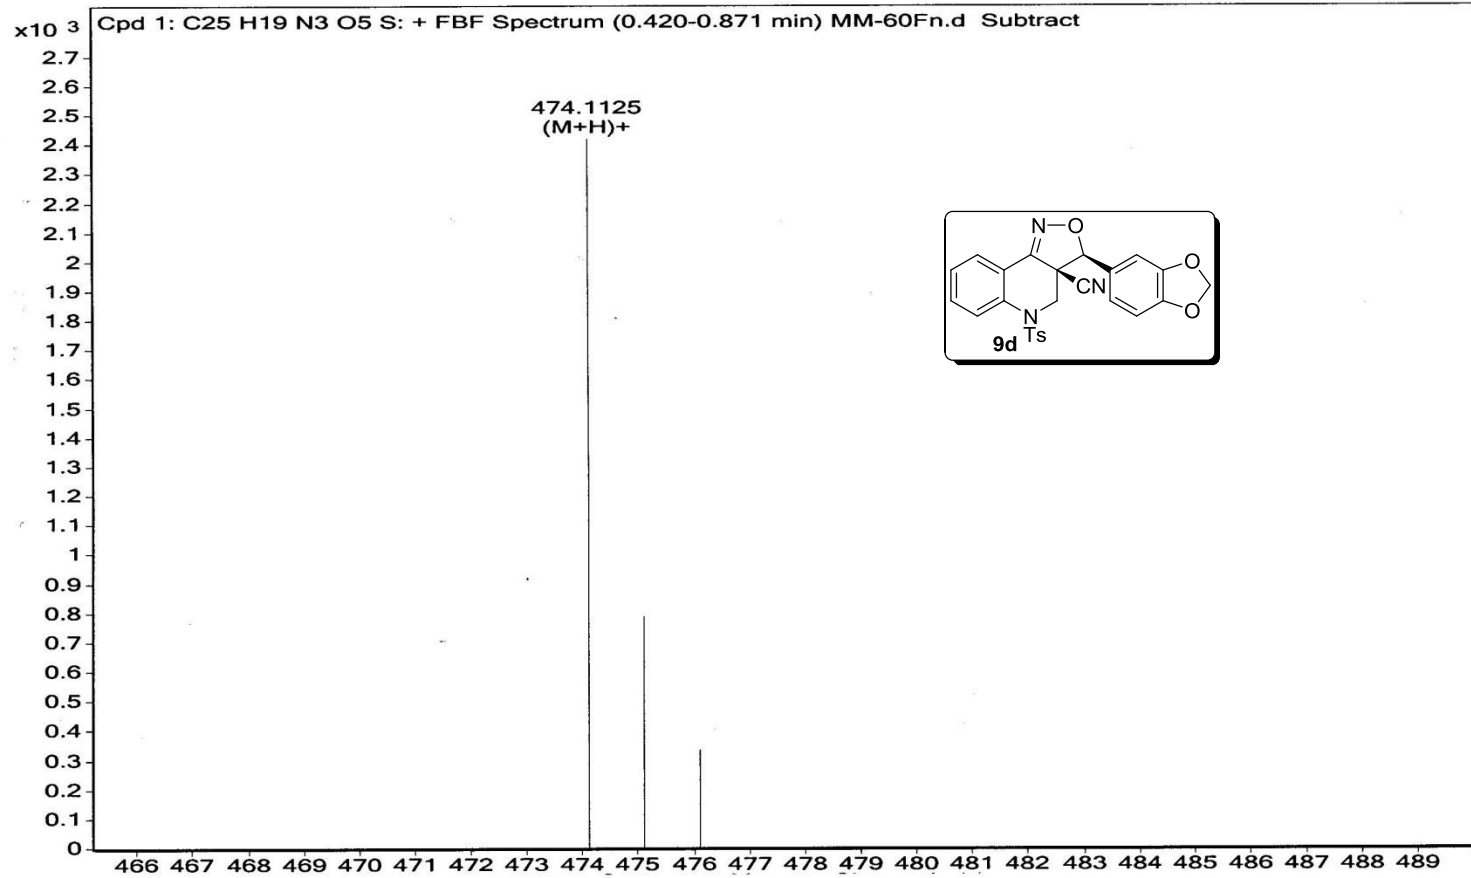

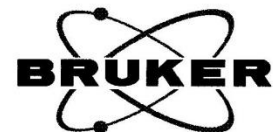

Current Data Parameters  
NAME VV-239  
EXPNO 1  
PROCNO 1

F2 - Acquisition Parameters  
Date\_ 20150620  
Time 16.50  
INSTRUM spect  
PROBHD 5 mm DUL 13C-1  
PULPROG zg30  
TD 65536  
SOLVENT CDCl3  
NS 16  
DS 2  
SWH 6172.839 Hz  
FIDRES 0.094190 Hz  
AQ 5.3084660 sec  
RG 90.5  
DW 81.000 usec  
DE 6.00 usec  
TE 300.0 K  
D1 1.00000000 sec  
TD0 1

===== CHANNEL f1 =====  
NUC1 1H  
P1 13.88 usec  
PL1 0.00 dB  
SFO1 300.1318534 MHz

F2 - Processing parameters  
SI 32768  
SF 300.1300000 MHz  
WDW EM  
SSB 0  
LB 0.30 Hz  
GB 0  
PC 1.00

10.422  
8.013  
7.991  
7.786  
7.760  
7.676  
7.584  
7.557  
7.514  
7.490  
7.407  
7.361  
7.330  
7.296  
7.234  
7.207  
7.185  
7.159  
7.093  
7.067  
6.990  
6.900  
6.877  
4.832  
4.783  
4.324  
4.276  
2.462

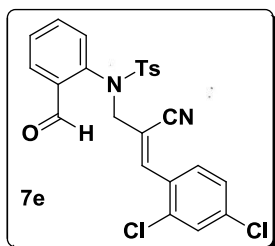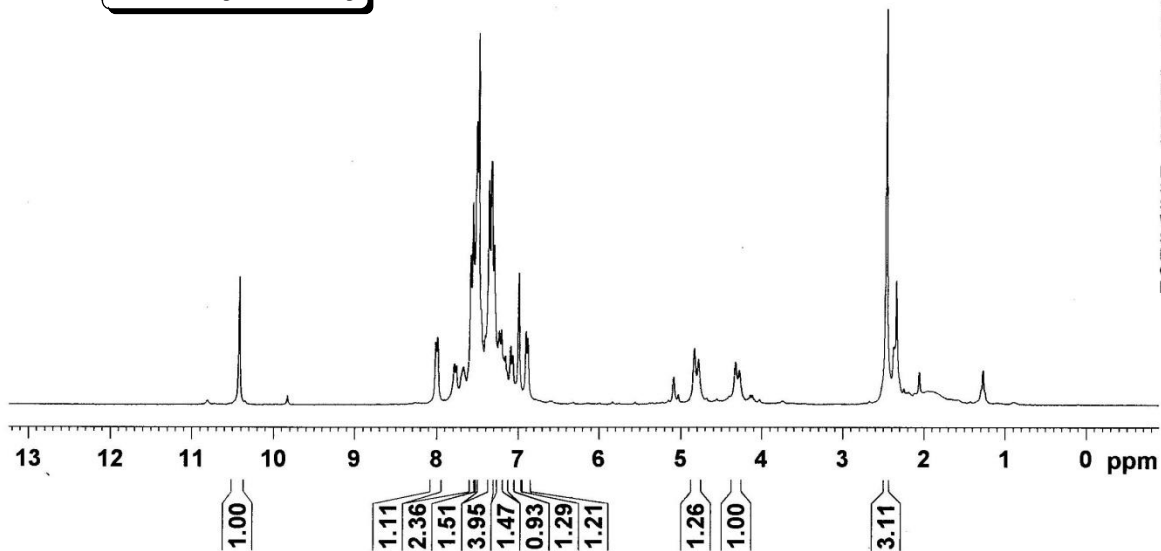



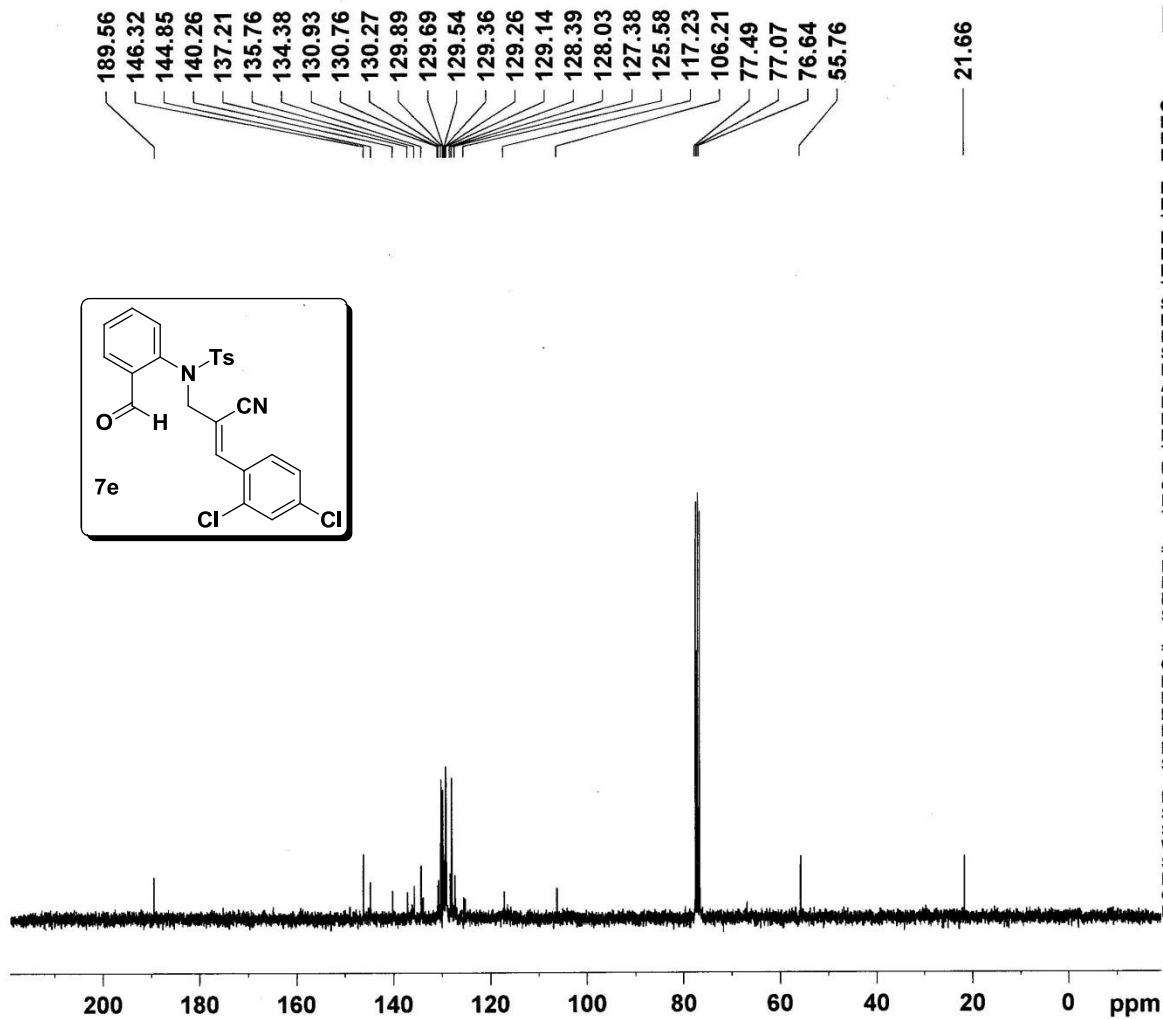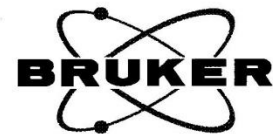

Current Data Parameters  
 NAME VV-239  
 EXPNO 2  
 PROCNO 1

F2 - Acquisition Parameters  
 Date\_ 20150620  
 Time 16.54  
 INSTRUM spect  
 PROBHD 5 mm DUL 13C-1  
 PULPROG zgpg30  
 TD 65536  
 SOLVENT CDCl3  
 NS 133  
 DS 4  
 SWH 17985.611 Hz  
 FIDRES 0.274439 Hz  
 AQ 1.8219508 sec  
 RG 10321.3  
 DW 27.800 usec  
 DE 6.00 usec  
 TE 300.0 K  
 D1 2.0000000 sec  
 d11 0.0300000 sec  
 DELTA 1.8999998 sec  
 TD0 1

===== CHANNEL f1 =====  
 NUC1 13C  
 P1 10.38 usec  
 PL1 0.00 dB  
 SFO1 75.4752953 MHz

===== CHANNEL f2 =====  
 CPDPRG2 waltz16  
 NUC2 1H  
 PCPD2 80.00 usec  
 PL2 0.00 dB  
 PL12 15.21 dB  
 PL13 16.00 dB  
 SFO2 300.1312005 MHz

F2 - Processing parameters  
 SI 32768  
 SF 75.4677490 MHz  
 WDW EM  
 SSB 0  
 LB 1.00 Hz  
 GB 0  
 PC 1.40

7.963  
7.937  
7.887  
7.860  
7.725  
7.697  
7.595  
7.569  
7.542  
7.482  
7.456  
7.386  
7.354  
7.327  
7.290  
7.261  
7.198  
7.162  
7.137  
7.112  
5.465  
5.304  
5.261  
3.898  
3.855

2.380

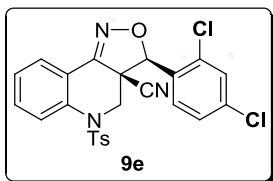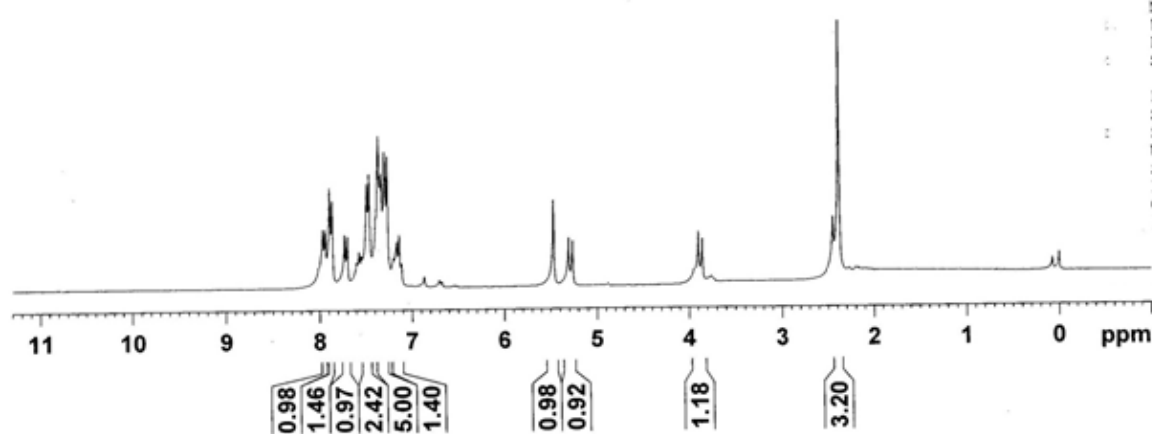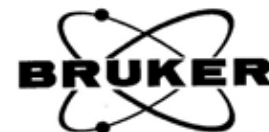

Current Data Parameters  
NAME VV-69F  
EXPNO 1  
PROCNO 1

F2 - Acquisition Parameter:  
Date\_ 20130117  
Time 18.08  
INSTRUM spect  
PROBHD 5 mm DUL 13C-1  
PULPROG zg30  
TD 65536  
SOLVENT CDCl3  
NS 16  
DS 2  
SWH 6172.839 Hz  
FIDRES 0.094190 Hz  
AQ 5.3084660 se  
RG 114  
DW 81.000 us  
DE 6.00 us  
TE 300.0 K  
D1 1.00000000 se  
TDO 1

----- CHANNEL f1 -----  
NUC1 1H  
P1 13.15 us  
PL1 0.00 dB  
SFO1 300.1318534 MH

F2 - Processing parameters  
S1 32768  
SF 300.1300068 MH  
WDW EM  
SSB 0  
LB 0.30 Hz  
GB 0  
PC 1.00

University of Madras

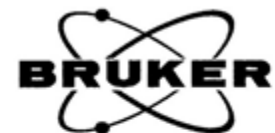

151.65  
146.58  
145.12  
136.77  
135.63  
132.66  
129.95  
128.63  
128.53  
128.08  
126.97  
126.74  
124.53  
119.77  
114.24  
113.97  
89.53  
77.45  
77.03  
76.60  
54.12  
51.02  
28.73  
21.60  
15.31

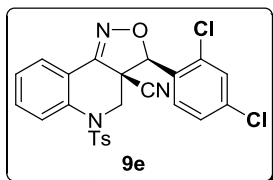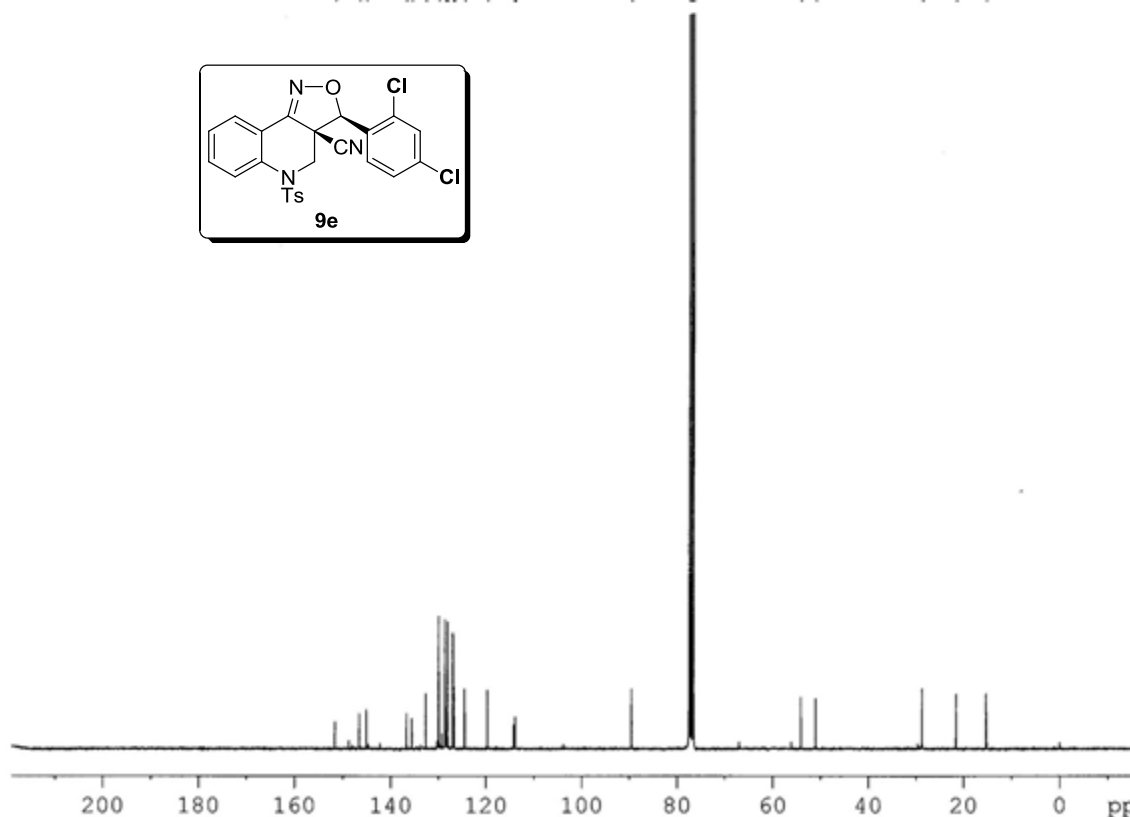

Current Data Parameters  
NAME VV-69F  
EXPNO 2  
PROCNO 1

F2 - Acquisition Parameters  
Date\_ 20130123  
Time 8.35  
INSTRUM spect  
PROBHD 5 mm DUL 13C-1  
PULPROG zgpg30  
TD 65536  
SOLVENT CDCl3  
NS 7645  
DS 4  
SWH 17985.611 Hz  
FIDRES 0.274439 Hz  
AQ 1.8219508 sec  
RG 2580.3  
DW 27.800 usec  
DE 6.00 usec  
TE 300.0 K  
D1 2.00000000 sec  
d11 0.03000000 sec  
DELTA 1.89999998 sec  
TD0 1

----- CHANNEL f1 -----  
NUC1 13C  
P1 9.30 usec  
PL1 0.00 dB  
SFO1 75.4752953 MHz

----- CHANNEL f2 -----  
CPDPRG2 waltz16  
NUC2 1H  
PCPD2 80.00 usec  
PL2 0.00 dB  
PL12 15.68 dB  
PL13 16.00 dB  
SFO2 300.1312005 MHz

F2 - Processing parameters  
SI 32768  
SF 75.4677490 MHz  
WDW EM  
SSB 0  
LB 1.00 Hz  
GB 0  
PC 1.40

|               |             |             |                      |                 |                 |                        |                     |
|---------------|-------------|-------------|----------------------|-----------------|-----------------|------------------------|---------------------|
| Sample Name   | MSK-V-69    | Position    |                      | Instrument Name | Q-TOF           | User Name              | QTOF-PU\admin       |
| Inj Vol       | -1          | InjPosition |                      | SampleType      | Sample          | IRM Calibration Status | Success             |
| Data Filename | MSK-V-69N.d | ACQ Method  | Pondicherry Universi | Comment         | MSK-MB-497.0368 | Acquired Time          | 23-06-2015 11:11:18 |

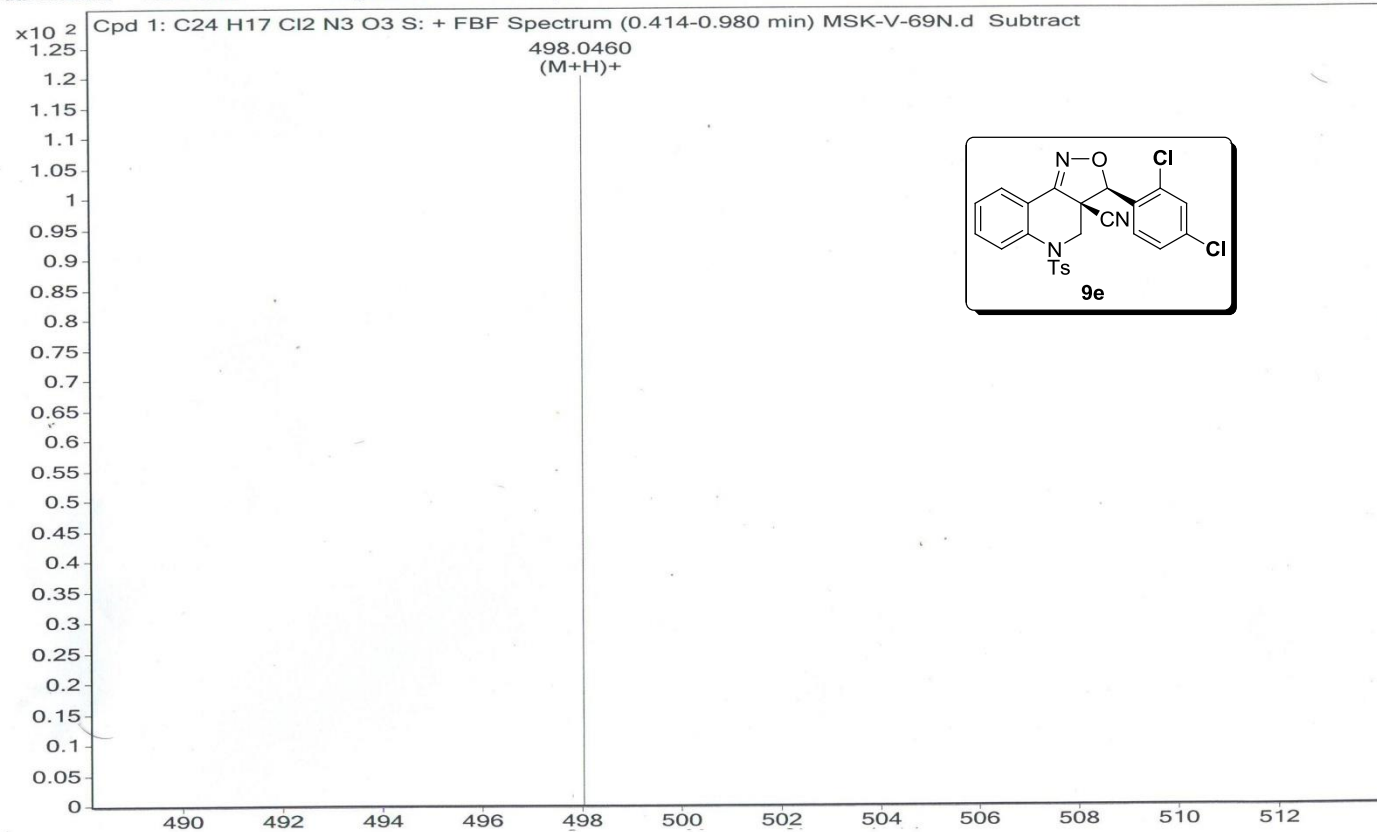

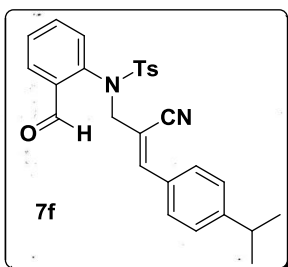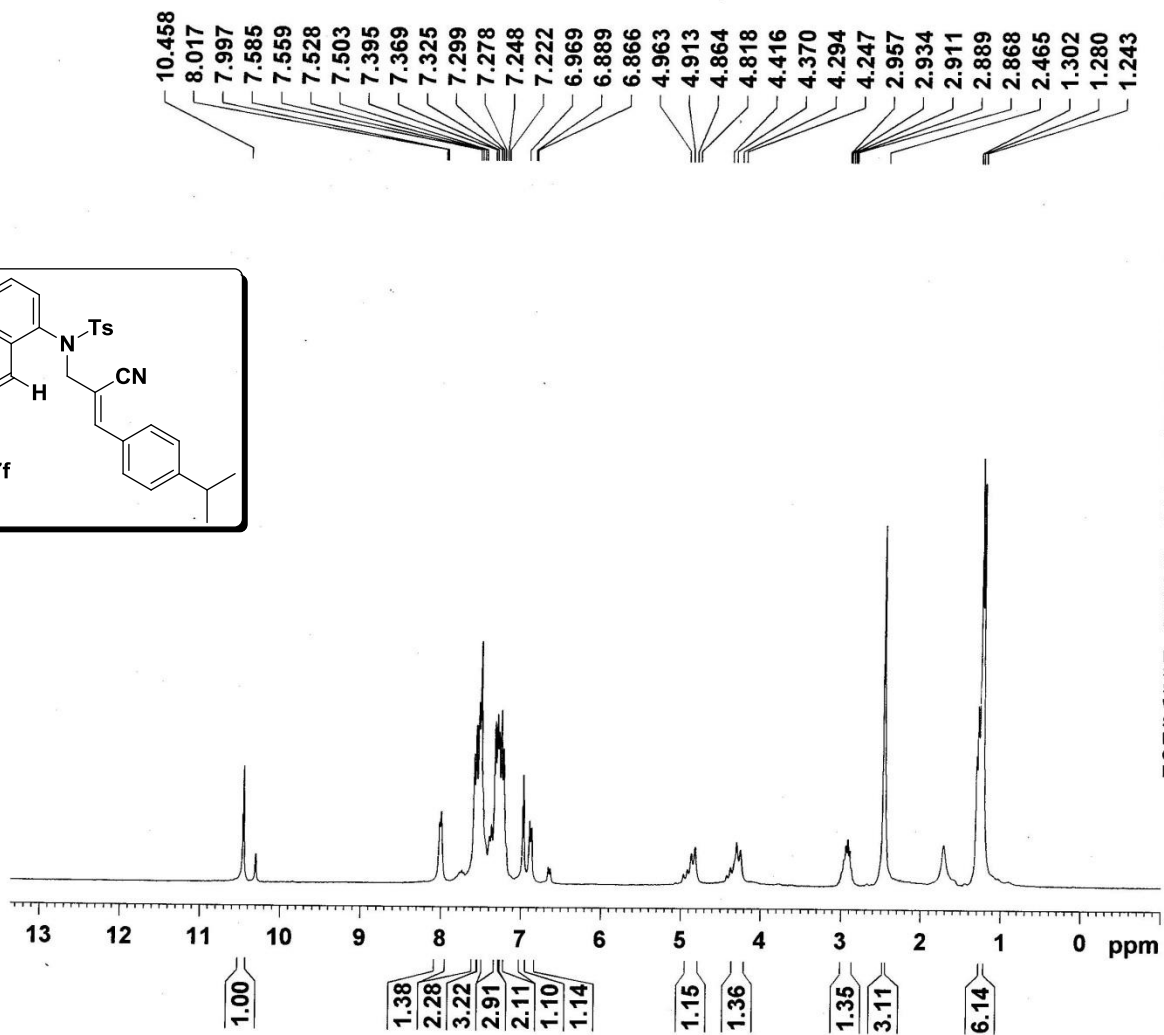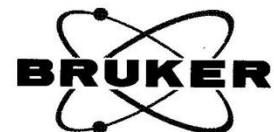

Current Data Parameters  
 NAME VV-240  
 EXPNO 1  
 PROCNO 1

F2 - Acquisition Parameters  
 Date\_ 20150620  
 Time 16.34  
 INSTRUM spect  
 PROBHD 5 mm DUL 13C-1  
 PULPROG zg30  
 TD 65536  
 SOLVENT CDCl3  
 NS 16  
 DS 2  
 SWH 6172.839 Hz  
 FIDRES 0.094190 Hz  
 AQ 5.3084660 sec  
 RG 80.6  
 DW 81.000 usec  
 DE 6.00 usec  
 TE 300.0 K  
 D1 1.00000000 sec  
 TD0 1

===== CHANNEL f1 =====  
 NUC1 1H  
 P1 13.88 usec  
 PL1 0.00 dB  
 SFO1 300.1318534 MHz

F2 - Processing parameters  
 SI 32768  
 SF 300.1300000 MHz  
 WDW EM  
 SSB 0  
 LB 0.30 Hz  
 GB 0  
 PC 1.00

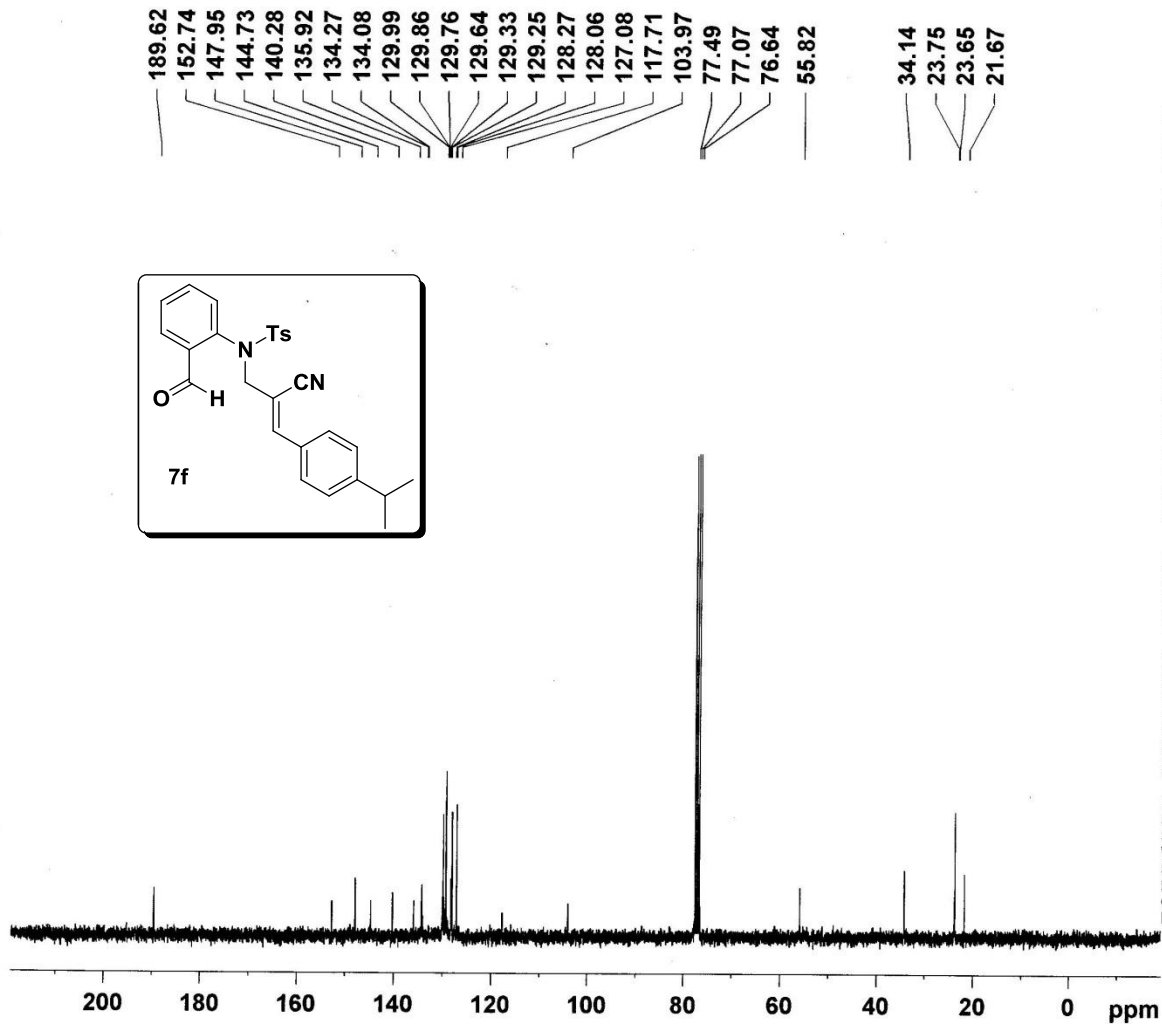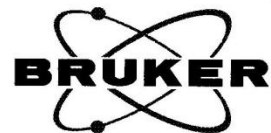

Current Data Parameters  
 NAME VV-240  
 EXPNO 2  
 PROCNO 1

F2 - Acquisition Parameters  
 Date\_ 20150620  
 Time 16.40  
 INSTRUM spect  
 PROBHD 5 mm DUL 13C-1  
 PULPROG zgpg30  
 TD 65536  
 SOLVENT CDCl3  
 NS 105  
 DS 4  
 SWH 17985.611 Hz  
 FIDRES 0.274439 Hz  
 AQ 1.8219508 sec  
 RG 1824.6  
 DW 27.800 usec  
 DE 6.00 usec  
 TE 300.0 K  
 D1 2.00000000 sec  
 d11 0.03000000 sec  
 DELTA 1.89999998 sec  
 TD0 1

===== CHANNEL f1 =====  
 NUC1 13C  
 P1 10.38 usec  
 PL1 0.00 dB  
 SFO1 75.4752953 MHz

===== CHANNEL f2 =====  
 CPDPRG2 waltz16  
 NUC2 1H  
 PCPD2 80.00 usec  
 PL2 0.00 dB  
 PL12 15.21 dB  
 PL13 16.00 dB  
 SFO2 300.1312005 MHz

F2 - Processing parameters  
 SI 32768  
 SF 75.4677490 MHz  
 WDW EM  
 SSB 0  
 LB 1.00 Hz  
 GB 0  
 PC 1.40

7.961  
7.935  
7.887  
7.860  
7.716  
7.688  
7.491  
7.464  
7.377  
7.352  
7.335  
7.291  
7.263  
7.158  
7.133  
5.455  
5.299  
5.256  
3.894  
3.852  
3.023  
3.000  
2.977  
2.954  
2.932  
2.379  
1.307  
1.284

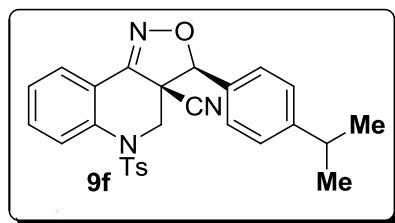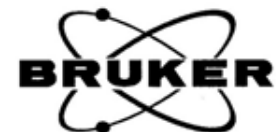

Current Data Parameters  
NAME VV-76  
EXPNO 1  
PROCNO 1

F2 - Acquisition Parameters  
Date\_ 20130409  
Time\_ 22.59  
INSTRUM spect  
PROBHD 5 mm DUL 13C-1  
PULPROG zg30  
TD 65536  
SOLVENT CDC13  
NS 16  
DS 2  
SWH 6172.839 Hz  
FIDRES 0.094190 Hz  
AQ 5.3084660 sec  
RG 71.8  
DW 81.000 usec  
DE 6.00 usec  
TE 300.0 K  
D1 1.00000000 sec  
TD0 1

----- CHANNEL f1 -----  
NUC1 1H  
P1 13.15 usec  
PL1 0.00 dB  
SFO1 300.1318534 MHz

F2 - Processing parameters  
SI 32768  
SF 300.1300073 MHz  
WDW EM  
SSB 0  
LB 0.30 Hz  
GB 0  
PC 1.00

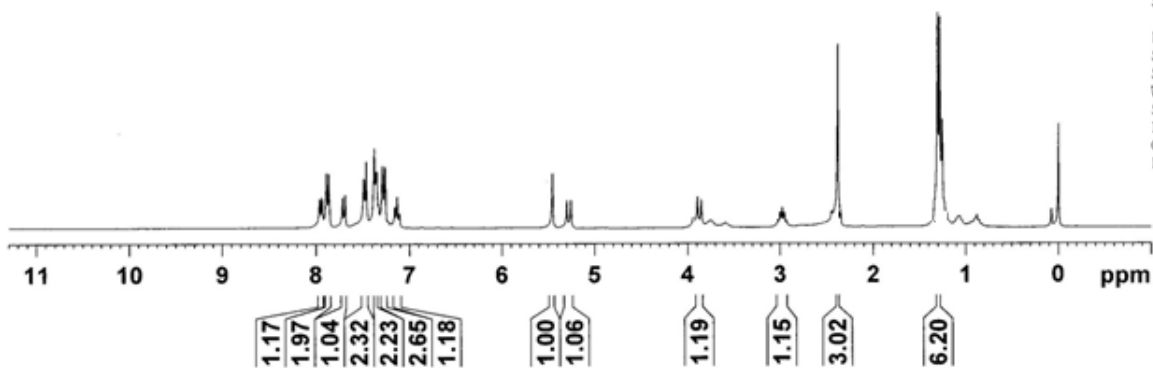

151.67  
151.18  
145.12  
136.77  
135.67  
132.66  
129.97  
128.56  
128.04  
127.05  
126.72  
124.54  
119.78  
114.23  
113.99  
89.53  
77.47  
77.05  
76.62  
54.08  
51.00  
34.04  
29.70  
23.88  
21.60

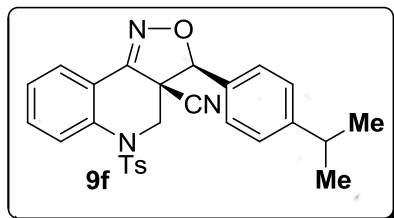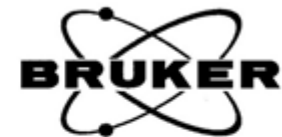

Current Data Parameters  
NAME VV-76  
EXPNO 2  
PROCNO 1

F2 - Acquisition Parameters  
Date\_ 20130409  
Time 23.06  
INSTRUM spect  
PROBHD 5 mm DUL 13C-1  
PULPROG zgpg30  
TD 65536  
SOLVENT CDC13  
NS 126  
DS 4  
SWH 17985.611 Hz  
FIDRES 0.274439 Hz  
AQ 1.8219508 sec  
RG 1448.2  
DW 27.800 usec  
DE 6.00 usec  
TE 300.0 K  
D1 2.00000000 sec  
d11 0.03000000 sec  
DELTA 1.89999998 sec  
TDO 1

----- CHANNEL f1 -----  
NUC1 13C  
P1 9.30 usec  
PL1 0.00 dB  
SFO1 75.4752953 MHz

----- CHANNEL f2 -----  
CPDPRG2 waltz16  
NUC2 1H  
PCPD2 80.00 usec  
PL2 0.00 dB  
PL12 15.68 dB  
PL13 16.00 dB  
SFO2 300.1312005 MHz

F2 - Processing parameters  
SI 32768  
SF 75.4677494 MHz  
WDW EM  
SSB 0  
LB 1.00 Hz  
GB 0  
PC 1.40

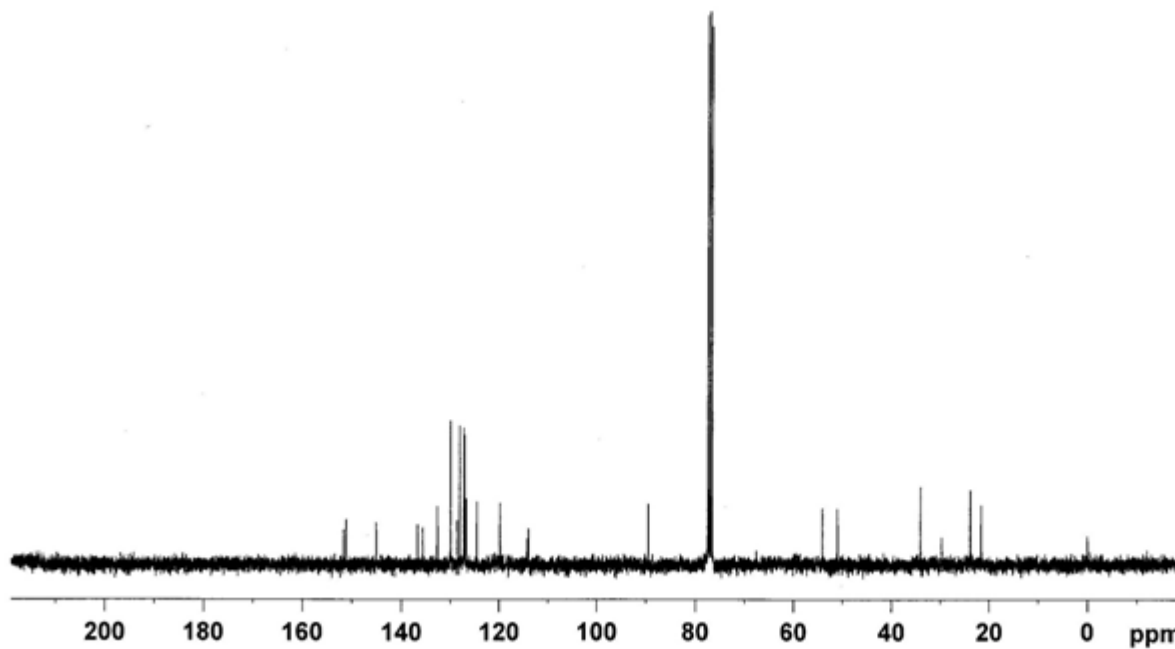



|                      |          |                    |                      |                        |                 |                               |                     |
|----------------------|----------|--------------------|----------------------|------------------------|-----------------|-------------------------------|---------------------|
| <b>Sample Name</b>   | MM-76-F  | <b>Position</b>    |                      | <b>Instrument Name</b> | Q-TOF           | <b>User Name</b>              | QTOF-PU\admin       |
| <b>Inj Vol</b>       | -1       | <b>InjPosition</b> |                      | <b>SampleType</b>      | Sample          | <b>IRM Calibration Status</b> | Success             |
| <b>Data Filename</b> | MM-76F.d | <b>ACQ Method</b>  | Pondicherry Universi | <b>Comment</b>         | MSK-MB-471.1617 | <b>Acquired Time</b>          | 05-06-2015 12:30:32 |

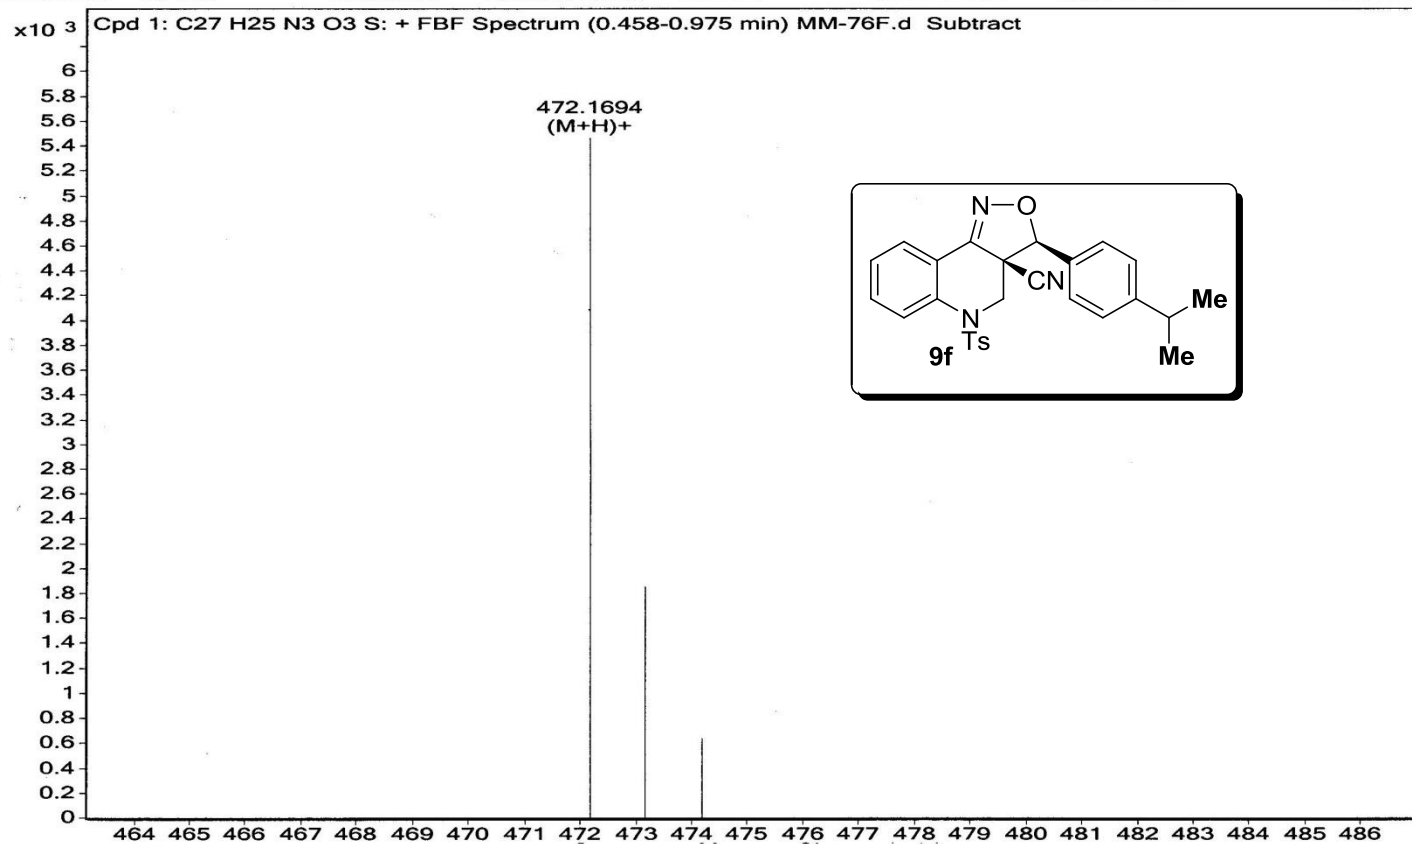

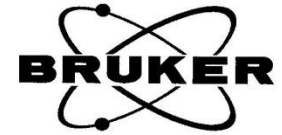

Current Data Parameters  
NAME DK-V-2-Me-TS-CN-CHO  
EXPNO 3  
PROCNO 1

F2 - Acquisition Parameters  
Date\_ 2011024  
Time\_ 13.46  
INSTRUM spect  
PROBHD 5 mm DUL 13C-1  
PULPROG zg30  
TD 65536  
SOLVENT CDCl3  
NS 5  
DS 2  
SWH 6172.839 Hz  
FIDRES 0.094190 Hz  
AQ 5.3084660 sec  
RG 64  
DW 81.000 usec  
DE 6.00 usec  
TE 300.0 K  
D1 1.00000000 sec  
TD0 1

===== CHANNEL f1 =====  
NUC1 1H  
P1 13.15 usec  
PL1 0.00 dB  
SFO1 300.1318534 MHz

F2 - Processing parameters  
SI 32768  
SF 300.1300000 MHz  
WDW EM  
SSB 0  
LB 0.30 Hz  
GB 0  
PC 1.00

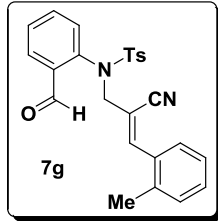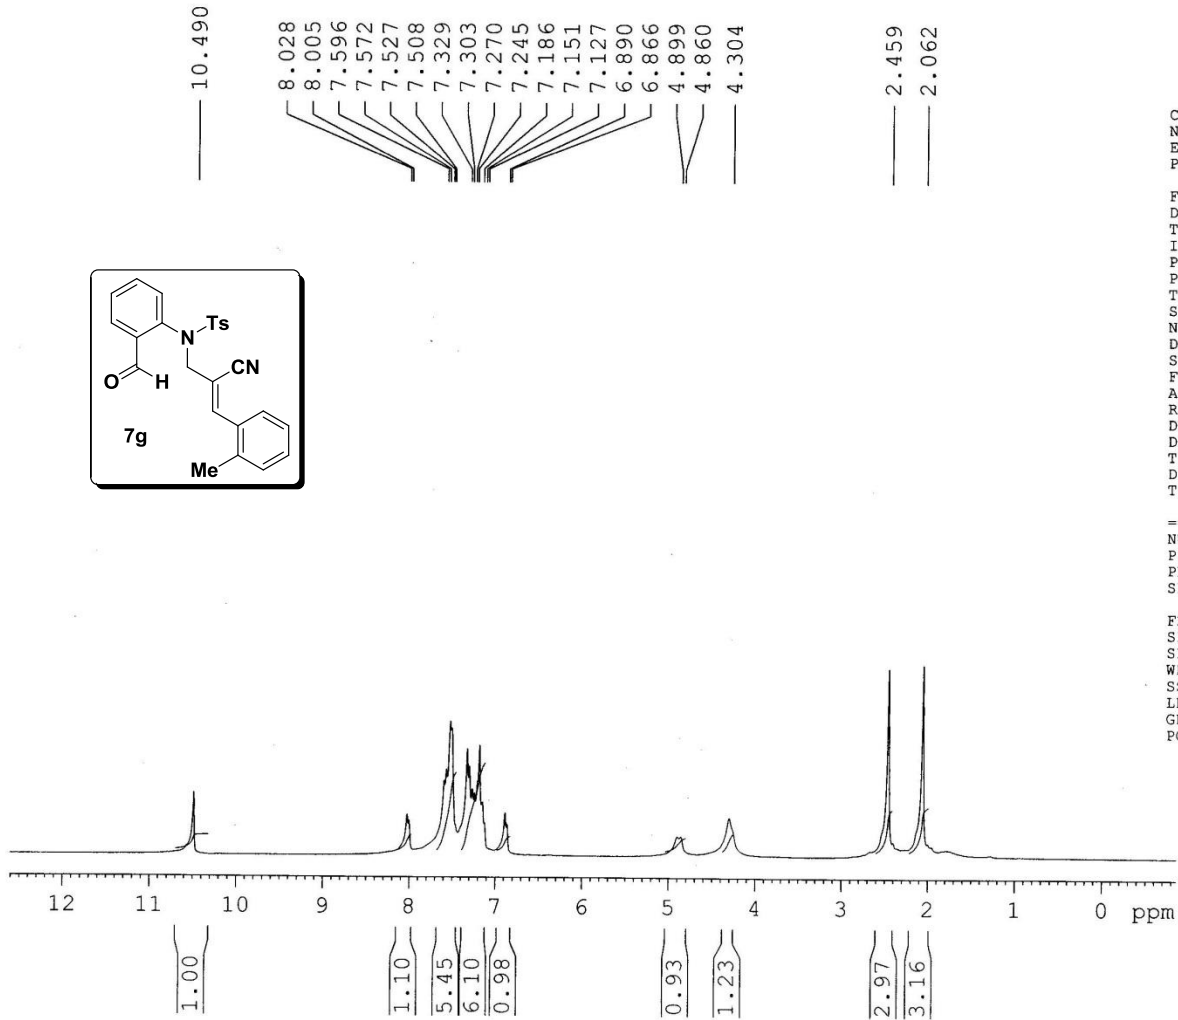

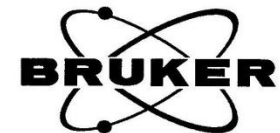

Current Data Parameters  
NAME DK-V-2-Me-TS-CN-CHO  
EXPNO 2  
PROCNO 1

F2 - Acquisition Parameters  
Date\_ 20111024  
Time 13.38  
INSTRUM spect  
PROBHD 5 mm DUL 13C-1  
PULPROG zgpg30  
TD 65536  
SOLVENT CDCl3  
NS 146  
DS 4  
SWH 17985.611 Hz  
FIDRES 0.274439 Hz  
AQ 1.8219508 sec  
RG 20642.5  
DW 27.800 usec  
DE 6.00 usec  
TE 300.0 K  
D1 2.0000000 sec  
d11 0.0300000 sec  
DELTA 1.89999998 sec  
TD0 1

===== CHANNEL f1 =====  
NUC1 13C  
P1 9.30 usec  
PL1 0.00 dB  
SFO1 75.4752953 MHz

===== CHANNEL f2 =====  
CPDPRG2 waltz16  
NUC2 1H  
PCPD2 80.00 usec  
PL2 0.00 dB  
PL12 15.68 dB  
PL13 16.00 dB  
SFO2 300.1312005 MHz

F2 - Processing parameters  
SI 32768  
SF 75.4677490 MHz  
WDW EM  
SSB 0  
LB 1.00 Hz  
GB 0  
PC 1.40

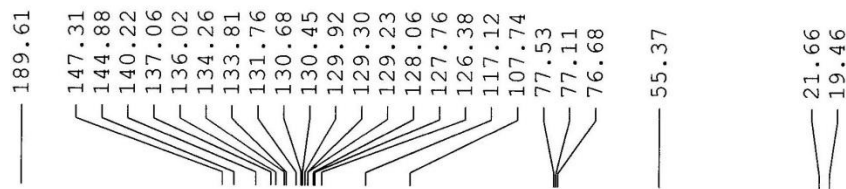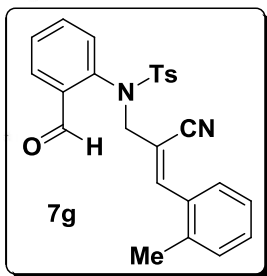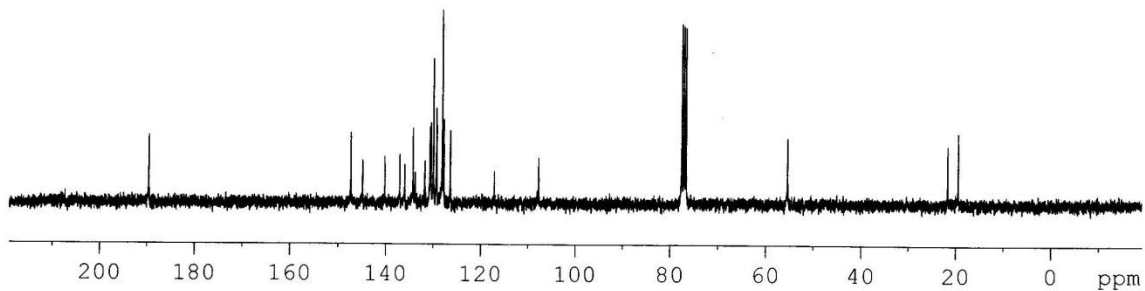

7.891  
7.887  
7.865  
7.861  
7.814  
7.786  
7.749  
7.731  
7.718  
7.647  
7.618  
7.321  
7.309  
7.303  
7.290  
7.262  
7.257  
7.226  
7.211  
7.186  
7.088  
7.063  
7.038  
5.756  
5.305  
5.262  
3.879  
3.837  
2.317  
2.302

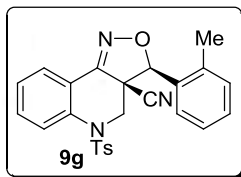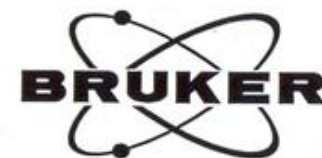

Current Data Parameters  
NAME VV-231  
EXPNO 1  
PROCNO 1

F2 - Acquisition Parameters  
Date\_ 20141223  
Time\_ 21.48  
INSTRUM spect  
PROBHD 5 mm DUL 13C-1  
PULPROG zg30  
TD 65536  
SOLVENT CDCl3  
NS 16  
DS 2  
SWH 6172.839 Hz  
FIDRES 0.094190 Hz  
AQ 5.3084660 sec  
RG 80.6  
DW 81.000 use  
DE 6.00 use  
TE 300.0 K  
D1 1.00000000 sec  
TD0 1

----- CHANNEL f1 -----  
NUC1 1H  
P1 13.15 use  
PL1 0.00 dB  
SFO1 300.1318534 MHz

F2 - Processing parameters  
SI 32768  
SF 300.1300293 MHz  
WDW EM  
SSB 0  
LB 0.30 Hz  
GB 0  
PC 1.00

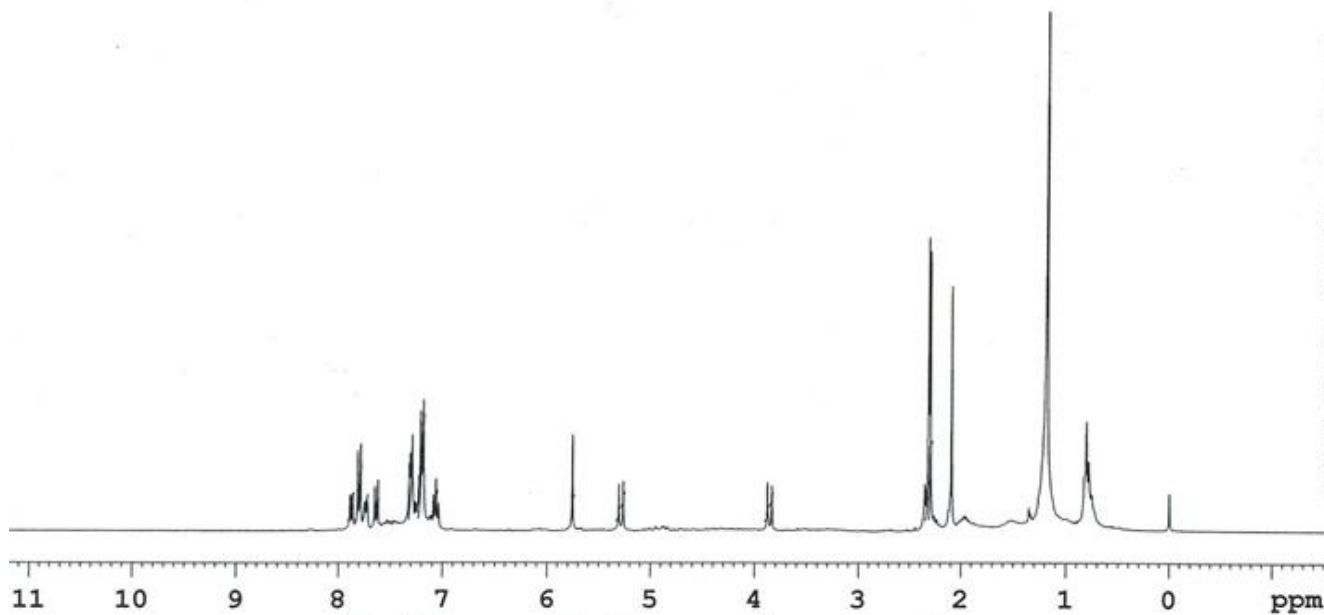

1.13  
2.11  
1.07  
1.13  
2.39  
4.18  
1.21  
1.00  
1.10  
1.09  
3.18  
3.13

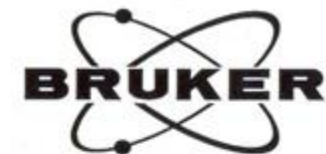

Current Data Parameters  
NAME VV-231  
EXPNO 2  
PROCNO 1

F2 - Acquisition Parameters  
Date\_ 20141223  
Time\_ 21.52  
INSTRUM spect  
PROBHD 5 mm DUL 13C-1  
PULPROG zgpg30  
TD 65536  
SOLVENT CDC13  
NS 154  
DS 4  
SWH 17985.611 Hz  
FIDRES 0.274439 Hz  
AQ 1.8219508 sec  
RG 2298.8  
DW 27.800 usec  
DE 6.00 usec  
TE 300.0 K  
D1 2.00000000 sec  
d11 0.03000000 sec  
DELTA 1.89999998 sec  
TDO 1

===== CHANNEL f1 =====  
NUC1 13C  
P1 9.30 usec  
PL1 0.00 dB  
SFO1 75.4752953 MHz

===== CHANNEL f2 =====  
CPDPRG2 waltz16  
NUC2 1H  
PCPD2 80.00 usec  
PL2 0.00 dB  
PL12 15.68 dB  
PL13 16.00 dB  
SFO2 300.1312005 MHz

F2 - Processing parameters  
SI 32768  
SF 75.4677490 MHz  
WDW EM  
SSB 0  
LB 1.00 Hz  
GB 0  
PC 1.40

151.19  
145.17  
136.56  
135.51  
135.41  
132.63  
130.96  
129.95  
129.70  
128.14  
127.59  
126.75  
124.54  
119.67  
113.88  
86.54  
77.47  
77.05  
76.63  
54.34  
51.16  
29.70  
21.61  
19.73  
14.13

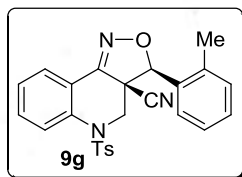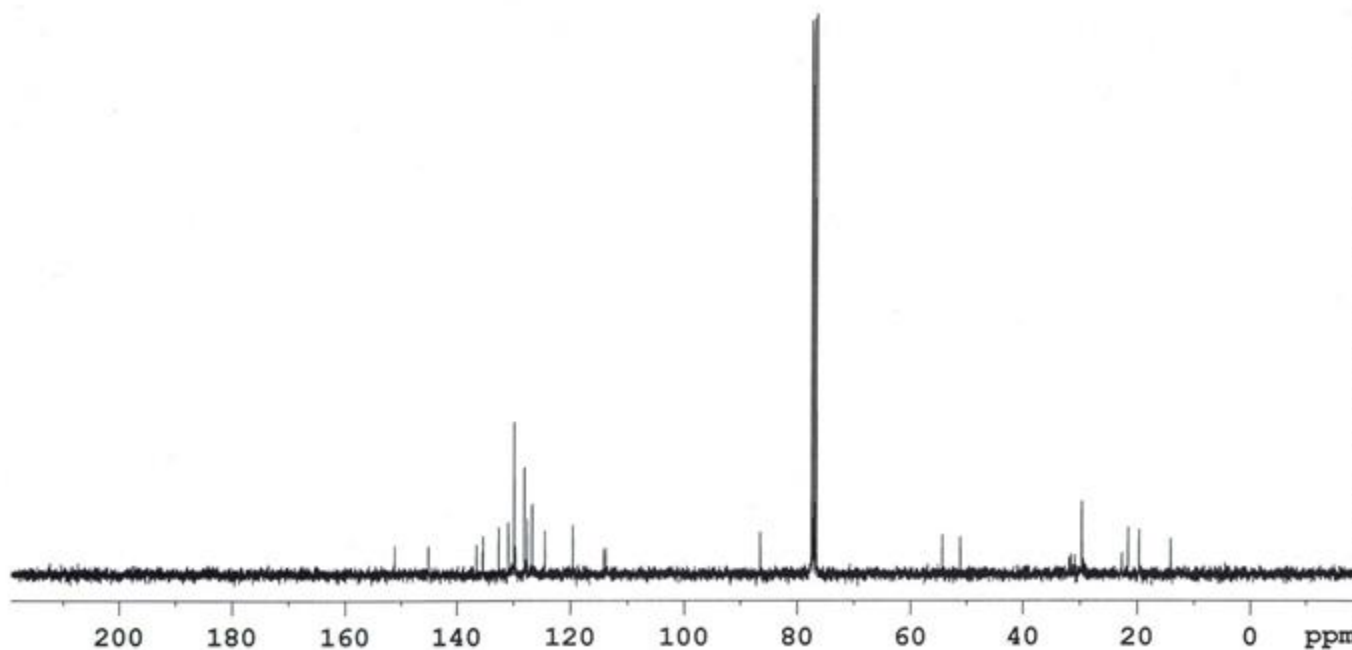

|                      |          |                    |                      |                        |                 |                               |                     |
|----------------------|----------|--------------------|----------------------|------------------------|-----------------|-------------------------------|---------------------|
| <b>Sample Name</b>   | MM-231   | <b>Position</b>    |                      | <b>Instrument Name</b> | Q-TOF           | <b>User Name</b>              | QTOF-PU\admin       |
| <b>Inj Vol</b>       | -1       | <b>InjPosition</b> |                      | <b>SampleType</b>      | Sample          | <b>IRM Calibration Status</b> | Success             |
| <b>Data Filename</b> | MM-231.d | <b>ACQ Method</b>  | Pondicherry Universi | <b>Comment</b>         | MSK-MB-443.1304 | <b>Acquired Time</b>          | 05-06-2015 14:21:13 |

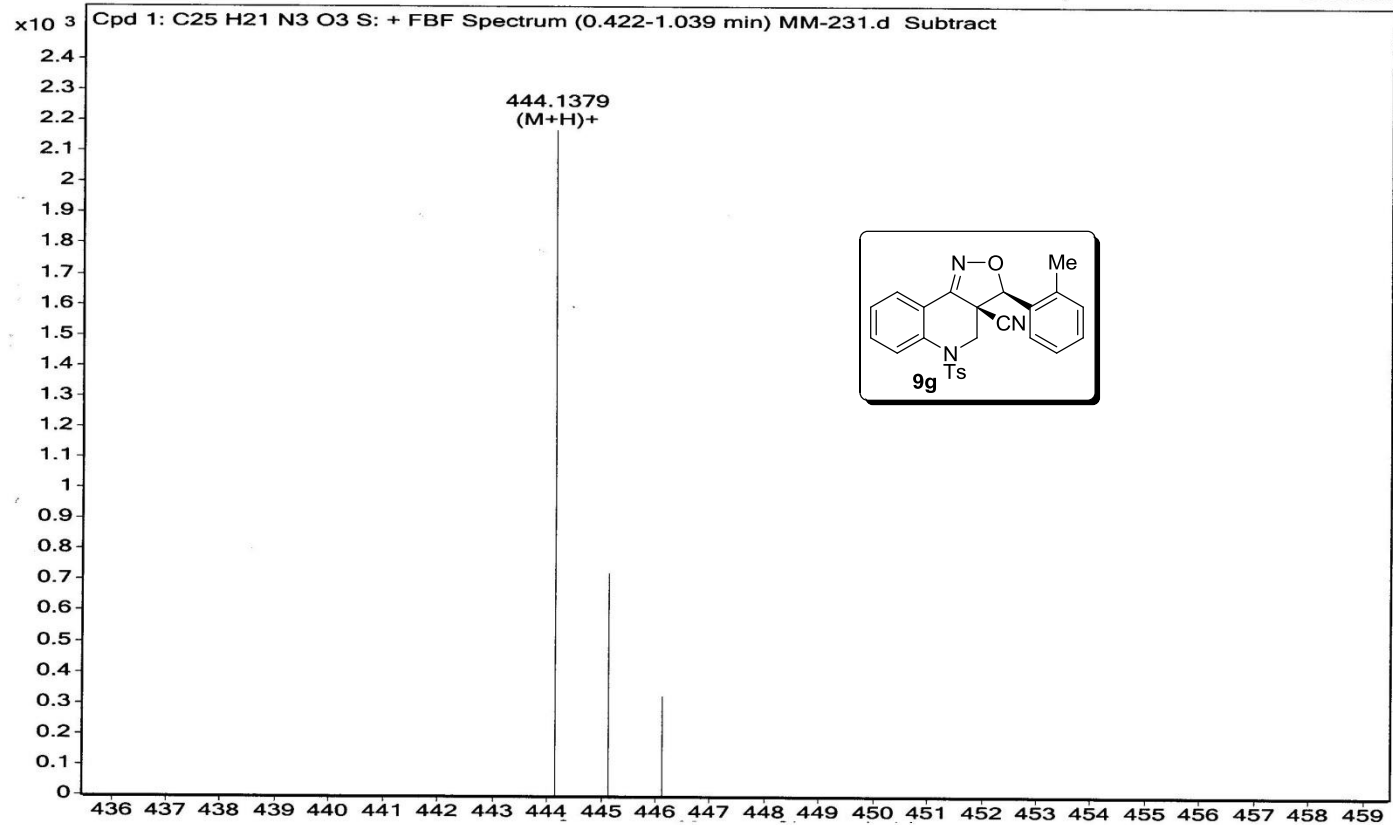

UNIV. OF MADRAS

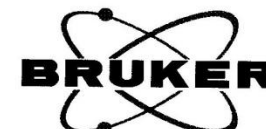

Current Data Parameters  
NAME V.V.-238  
EXPNO 1  
PROCNO 1

F2 - Acquisition Parameters  
Date\_ 20150622  
Time\_ 12.35  
INSTRUM spect  
PROBHD 5 mm DUL 13C-1  
PULPROG zg30  
TD 65536  
SOLVENT CDCl3  
NS 16  
DS 2  
SWH 6172.839 Hz  
FIDRES 0.094190 Hz  
AQ 5.3084660 sec  
RG 128  
DW 81.000 usec  
DE 6.00 usec  
TE 300.0 K  
D1 1.00000000 sec  
TDO 1

===== CHANNEL f1 =====  
NUC1 1H  
P1 13.88 usec  
PL1 0.00 dB  
SFO1 300.1318534 MHz

F2 - Processing parameters  
SI 32768  
SF 300.1300040 MHz  
WDW EM  
SSB 0  
LB 0.30 Hz  
GB 0  
PC 1.00

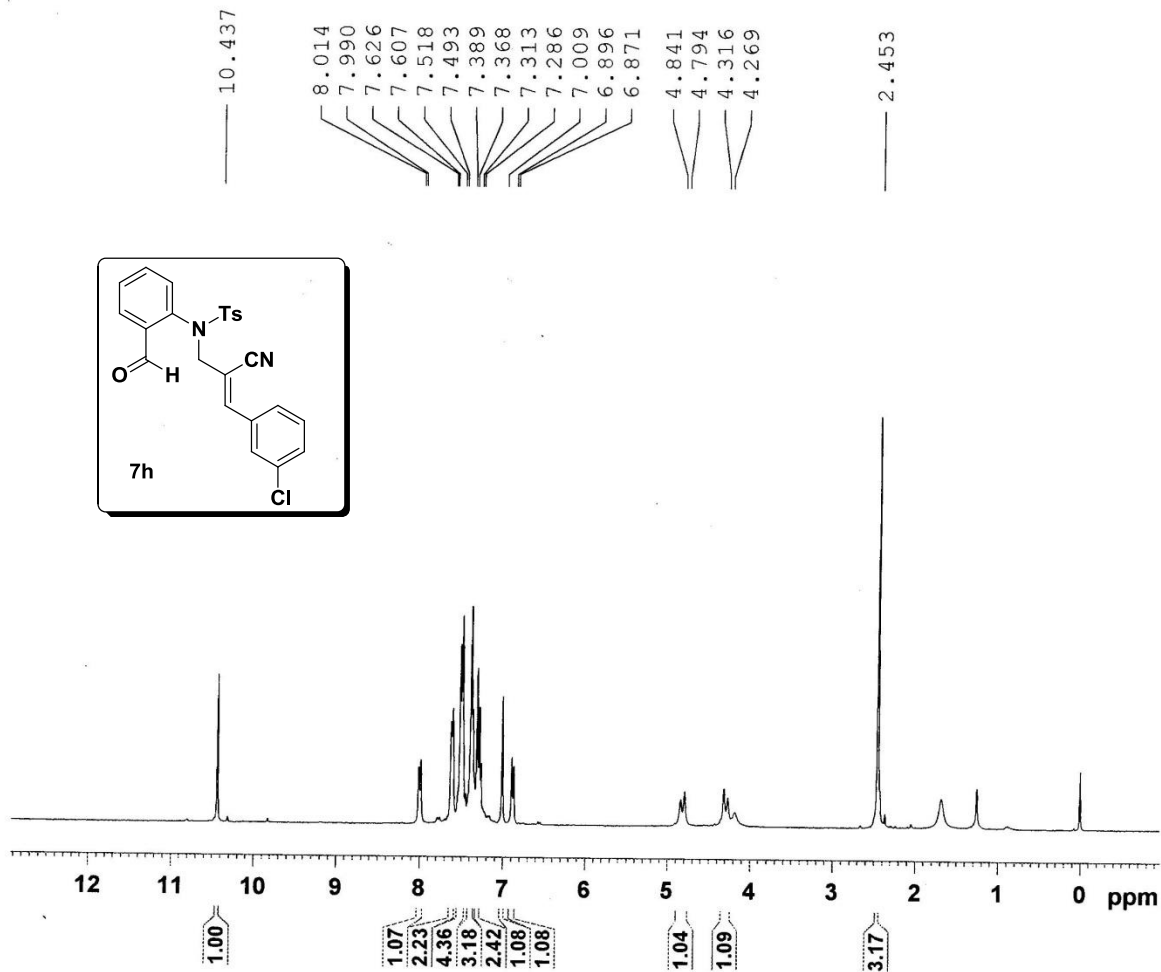

UNIV. OF MADRAS

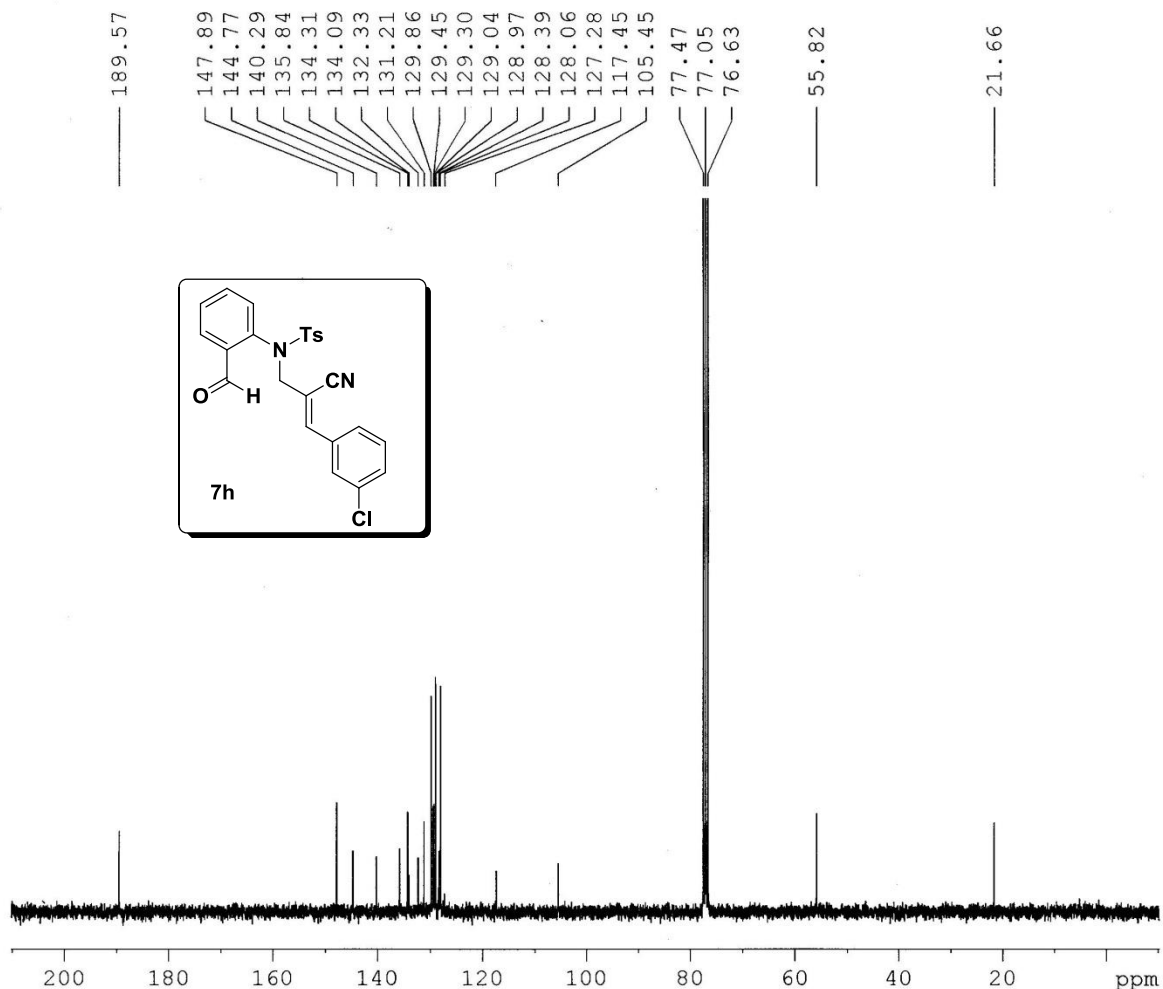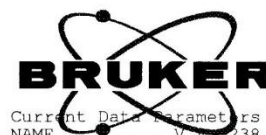

Current Data Parameters  
NAME V.V. 238  
EXPNO 2  
PROCNO 1

F2 - Acquisition Parameters  
Date\_ 20150622  
Time 12.52  
INSTRUM spect  
PROBHD 5 mm DUL 13C-1  
PULPROG zgpg30  
TD 65536  
SOLVENT CDCl3  
NS 250  
DS 4  
SWH 17985.611 Hz  
FIDRES 0.274439 Hz  
AQ 1.8219508 sec  
RG 20642.5  
DW 27.800 usec  
DE 6.00 usec  
TE 300.0 K  
D1 2.00000000 sec  
d11 0.03000000 sec  
DELTA 1.89999998 sec  
TD0 1

===== CHANNEL f1 =====  
NUC1 13C  
P1 10.38 usec  
PL1 0.00 dB  
SFO1 75.4752953 MHz

===== CHANNEL f2 =====  
CPDPRG2 waltz16  
NUC2 1H  
PCPD2 80.00 usec  
PL2 0.00 dB  
PL12 15.21 dB  
PL13 16.00 dB  
SFO2 300.1312005 MHz

F2 - Processing parameters  
SI 32768  
SF 75.4677490 MHz  
WDW EM  
SSB 0  
LB 1.00 Hz  
GB 0  
PC 1.40



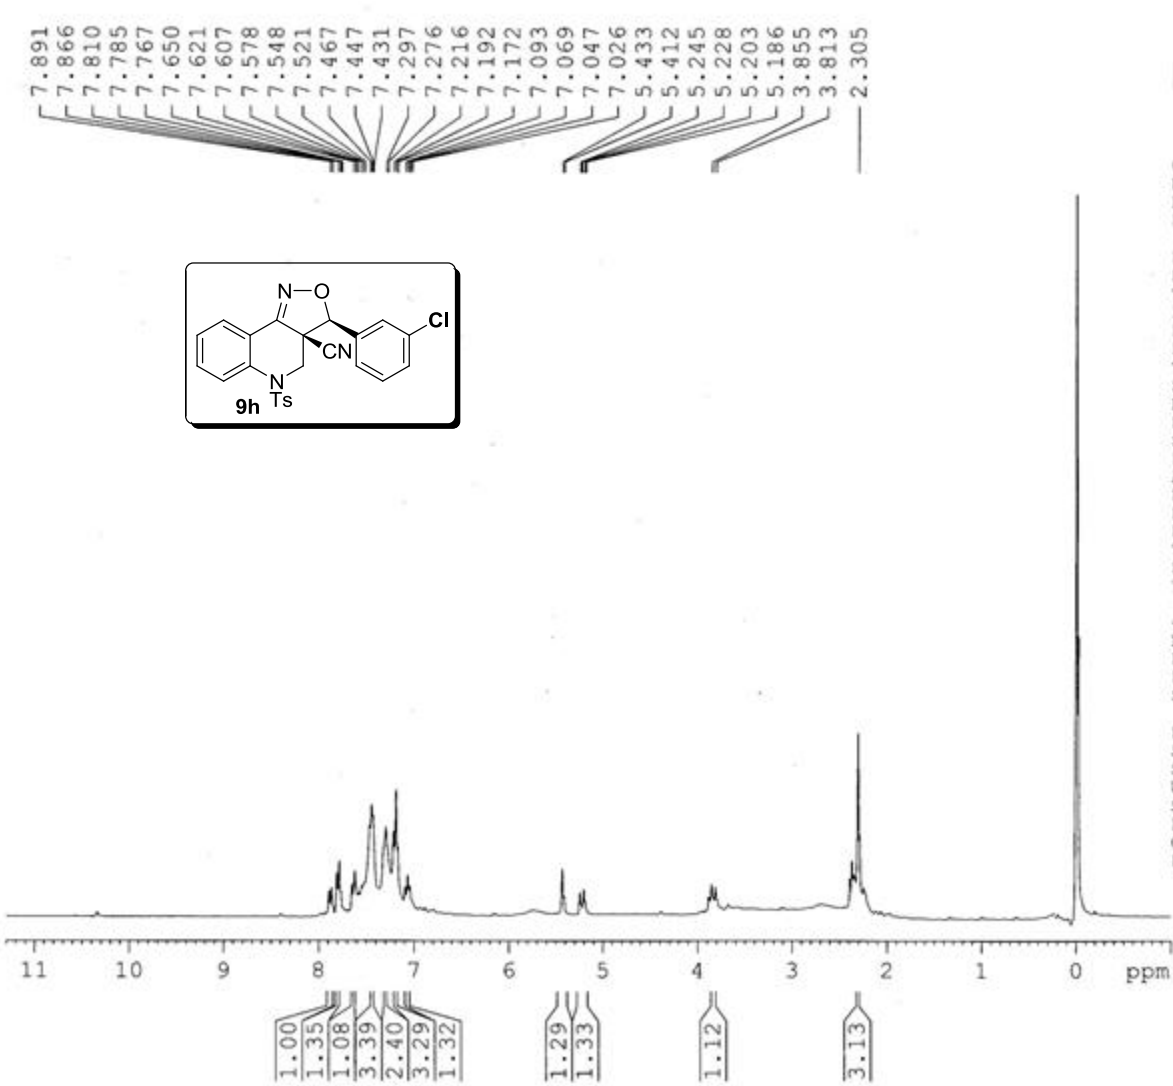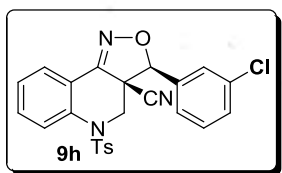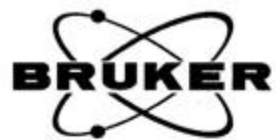

Current Data Parameters  
 NAME VV-232  
 EXPNO 1  
 PROCNO 1

F2 - Acquisition Parameters  
 Date\_ 20141230  
 Time\_ 21.31  
 INSTRUM spect  
 PROBHD 5 mm DUL 13C-1  
 PULPROG zg30  
 TD 65536  
 SOLVENT CDCl3  
 NS 16  
 DS 2  
 SWH 6172.839 Hz  
 FIDRES 0.094190 Hz  
 AQ 5.3084660 sec  
 RG 64  
 DW 81.000 usec  
 DE 6.00 usec  
 TE 300.0 K  
 D1 1.00000000 sec  
 TDO 1

----- CHANNEL f1 -----  
 NUC1 1H  
 P1 13.15 usec  
 PL1 0.00 dB  
 SFO1 300.1318534 MHz

F2 - Processing parameters  
 SI 32768  
 SF 300.1300288 MHz  
 WDW EM  
 SSB 0  
 LB 0.30 Hz  
 GB 0  
 PC 1.00

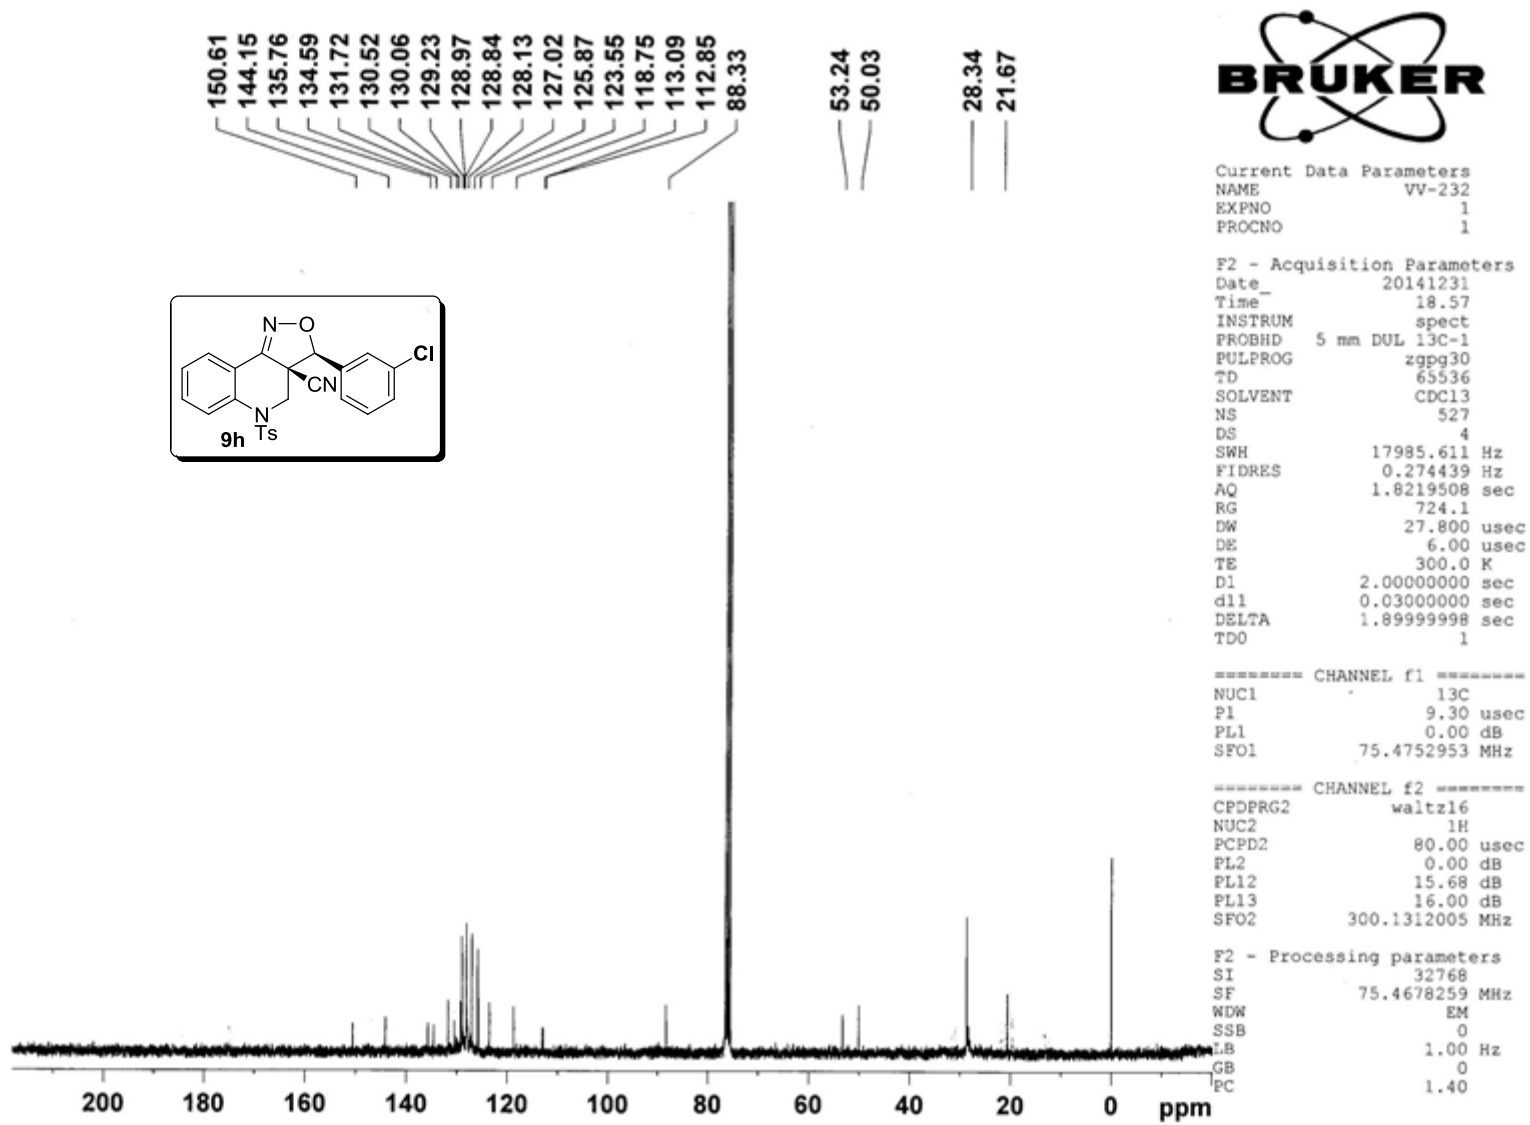

|               |            |             |                      |                 |              |                        |                     |
|---------------|------------|-------------|----------------------|-----------------|--------------|------------------------|---------------------|
| Sample Name   | MSK-232F   | Position    |                      | Instrument Name | Q-TOF        | User Name              | QTOF-PU\admin       |
| Inj Vol       | -1         | InjPosition |                      | SampleType      | Sample       | IRM Calibration Status | Success             |
| Data Filename | MSK-232F.d | ACQ Method  | Pondicherry Universi | Comment         | MSK-463.0757 | Acquired Time          | 15-06-2015 14:36:02 |

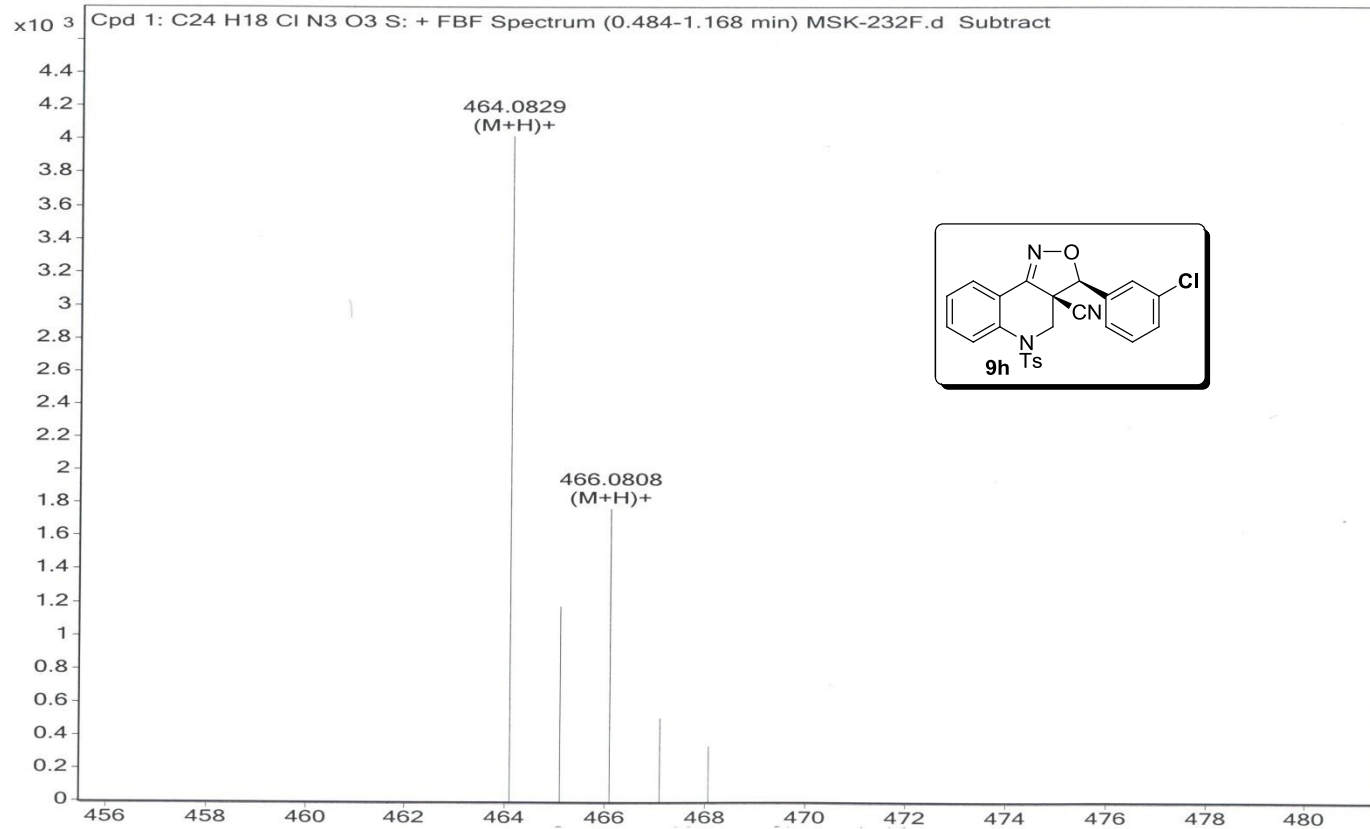

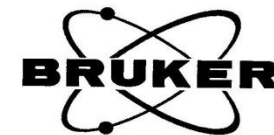

Current Data Parameters  
NAME DK-V-Ome2 CN Ts-CHO  
EXPNO 1  
PROCNO 1

F2 - Acquisition Parameters  
Date\_ 20111009  
Time 18.07  
INSTRUM spect  
PROBHD 5 mm DUL 13C-1  
PULPROG zg30  
TD 65536  
SOLVENT CDCl3  
NS 16  
DS 2  
SWH 6172.839 Hz  
FIDRES 0.094190 Hz  
AQ 5.3084660 sec  
RG 64  
DW 81.000 usec  
DE 6.00 usec  
TE 300.0 K  
D1 1.00000000 sec  
TDO 1

===== CHANNEL f1 =====  
NUC1 1H  
P1 13.15 usec  
PL1 0.00 dB  
SFO1 300.1318534 MHz

F2 - Processing parameters  
SI 32768  
SF 300.1300000 MHz  
WDW EM  
SSB 0  
LB 0.30 Hz  
GB 0  
PC 1.00

10.471  
8.007  
8.001  
7.983  
7.976  
7.546  
7.539  
7.509  
7.482  
7.468  
7.442  
7.422  
7.417  
7.312  
7.285  
7.110  
7.105  
7.082  
7.077  
6.915  
6.870  
6.847  
6.828  
6.800  
4.853  
4.806  
4.258  
4.210  
3.886  
3.864  
2.450

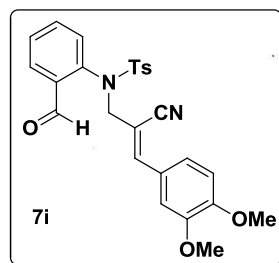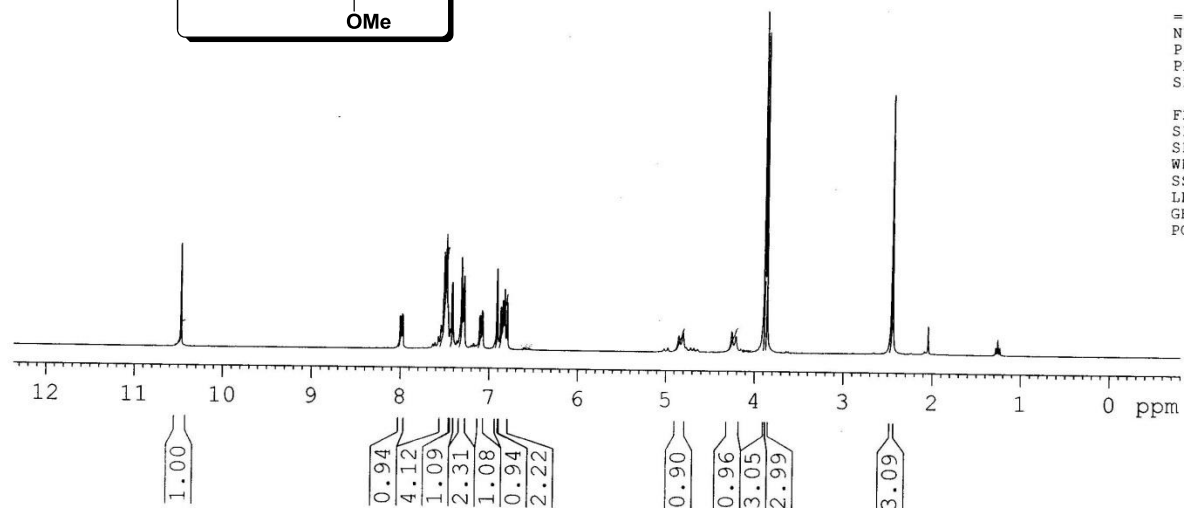

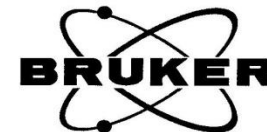

189.70  
151.68  
149.01  
147.75  
144.73  
140.40  
135.95  
134.29  
134.08  
129.85  
129.76  
129.21  
128.23  
128.02  
125.33  
124.37  
118.19  
110.84  
110.45  
101.91  
77.53  
77.10  
76.68  
60.94  
55.99  
55.94  
55.86  
21.64

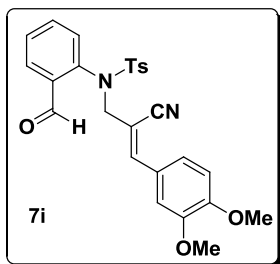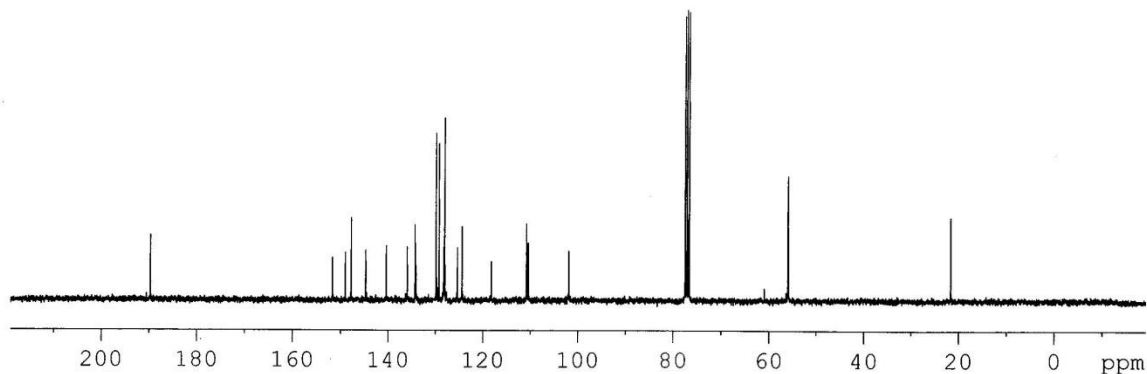

Current Data Parameters  
NAME DK-V-Ome2 CN Ts-CHO  
EXPNO 2  
PROCNO 1

F2 - Acquisition Parameters  
Date\_ 20111009  
Time 18.22  
INSTRUM spect  
PROBHD 5 mm DUL 13C-1  
PULPROG zgpg30  
TD 65536  
SOLVENT CDC13  
NS 219  
DS 4  
SWH 17985.611 Hz  
FIDRES 0.274439 Hz  
AQ 1.8219508 sec  
RG 5160.6  
DW 27.800 usec  
DE 6.00 usec  
TE 300.0 K  
D1 2.0000000 sec  
d11 0.0300000 sec  
DELTA 1.89999998 sec  
TD0 1

===== CHANNEL f1 =====  
NUC1 13C  
P1 9.30 usec  
PL1 0.00 dB  
SFO1 75.4752953 MHz

===== CHANNEL f2 =====  
CPDPRG2 waltz16  
NUC2 1H  
PCPD2 80.00 usec  
PL2 0.00 dB  
PL12 15.68 dB  
PL13 16.00 dB  
SFO2 300.1312005 MHz

F2 - Processing parameters  
SI 32768  
SF 75.4677490 MHz  
WDW EM  
SSB 0  
LB 1.00 Hz  
GB 0  
PC 1.40

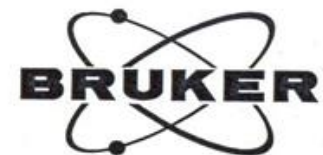

Current Data Parameters  
NAME VV-78  
EXPNO 1  
PROCNO 1

F2 - Acquisition Parameters  
Date\_ 20140827  
Time\_ 0.27  
INSTRUM spect  
PROBHD 5 mm DUL 13C-1  
PULPROG zg30  
TD 65536  
SOLVENT CDC13  
NS 16  
DS 2  
SWH 6172.839 Hz  
FIDRES 0.094190 Hz  
AQ 5.3084660 sec  
RG 228.1  
DW 81.000 usec  
DE 6.00 usec  
TE 300.0 K  
D1 1.00000000 sec  
TD0 1

----- CHANNEL f1 -----  
NUC1 1H  
P1 13.15 usec  
PL1 0.00 dB  
SFO1 300.1318534 MHz

F2 - Processing parameters  
SI 32768  
SF 300.1300066 MHz  
WDW EM  
SSB 0  
LB 0.30 Hz  
GB 0  
FC 1.00

7.971  
7.945  
7.887  
7.861  
7.749  
7.720  
7.408  
7.382  
7.350  
7.303  
7.276  
7.263  
7.175  
7.150  
7.125  
7.101  
5.953  
5.568  
5.524  
  
3.984  
3.938  
3.912

2.338

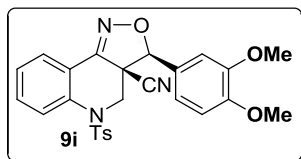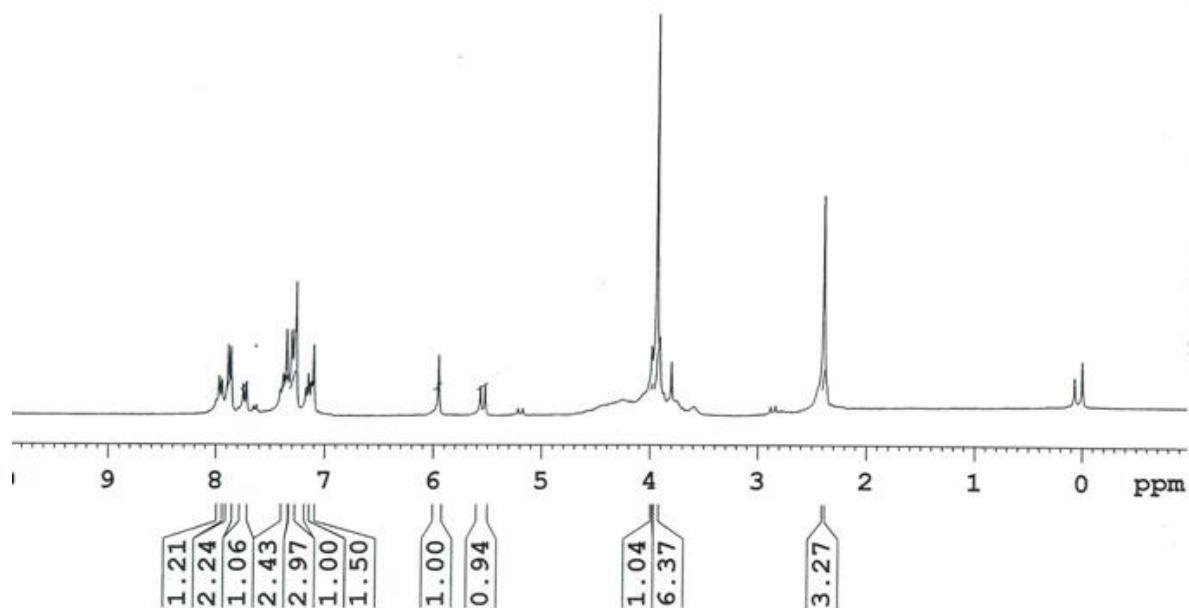

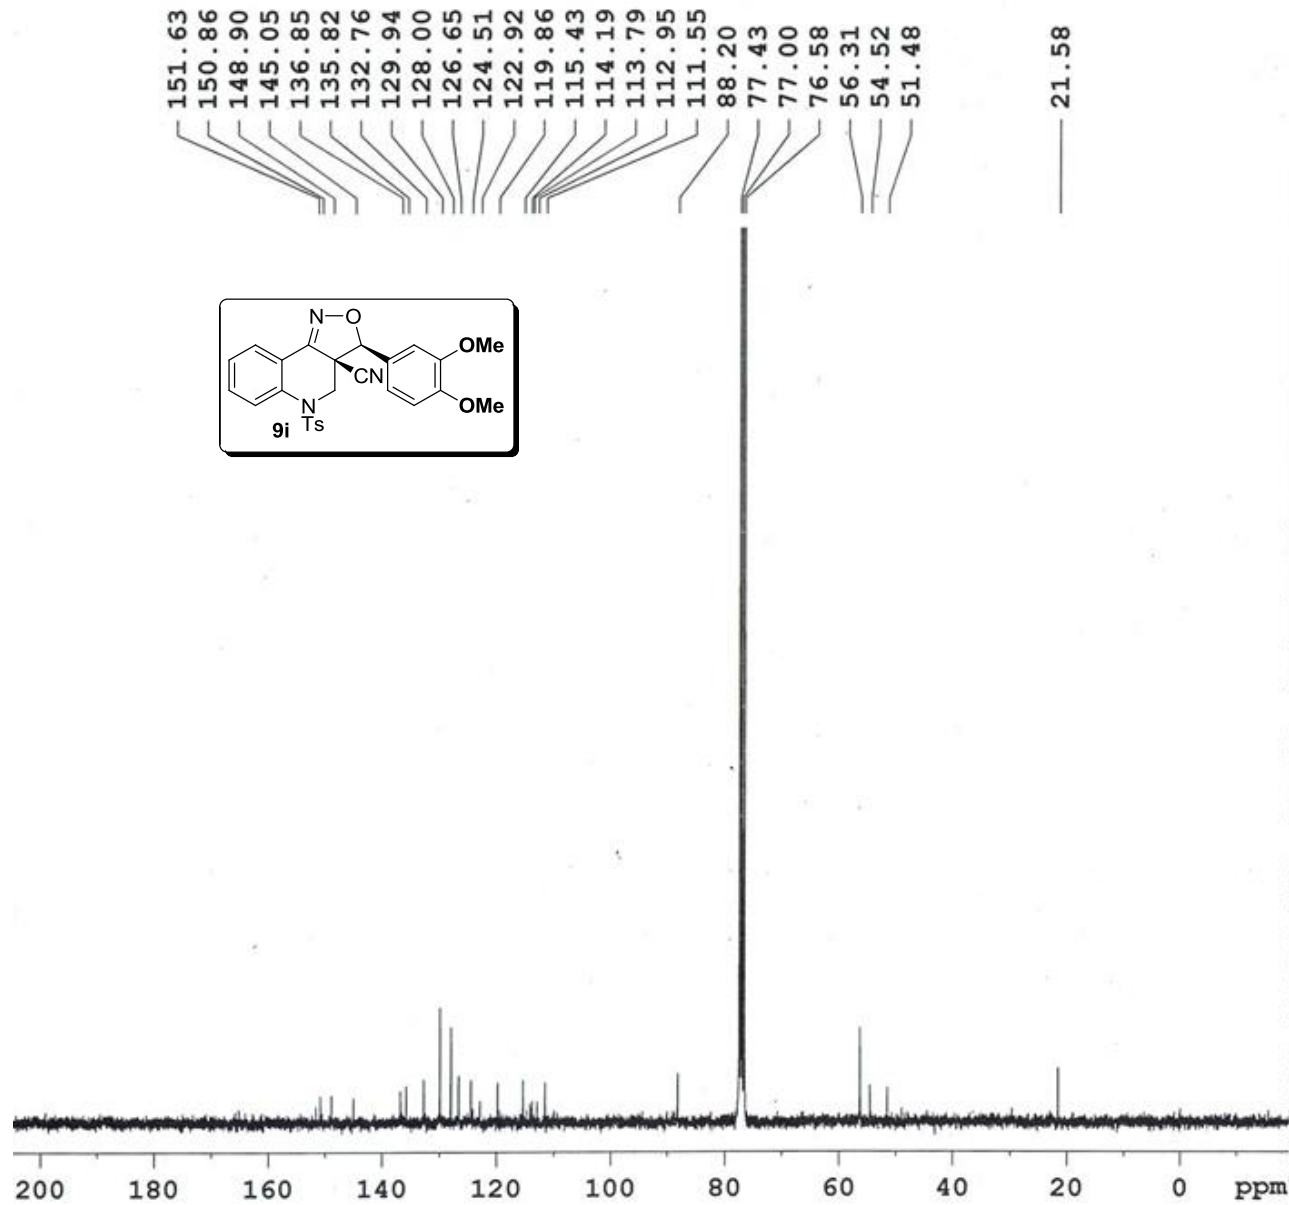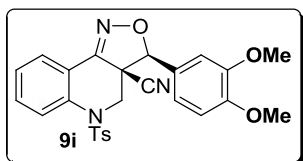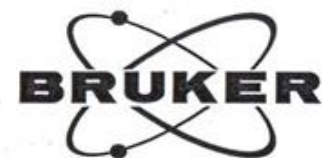

Current Data Parameters  
NAME VV-78  
EXPNO 2  
PROCNO 1

F2 - Acquisition Parameters  
Date\_ 20140827  
Time\_ 3.17  
INSTRUM spect  
PROBHD 5 mm DUL 13C-1  
PULPROG zgpg30  
TD 65536  
SOLVENT CDCl3  
NS 2651  
DS 4  
SWH 17985.611 Hz  
FIDRES 0.274439 Hz  
AQ 1.8219508 sec  
RG 456.1  
DW 27.800 usec  
DE 6.00 usec  
TE 300.0 K  
D1 2.00000000 sec  
d11 0.03000000 sec  
DELTA 1.89999998 sec  
TD0 1

===== CHANNEL f1 =====  
NUC1 13C  
P1 9.30 usec  
PL1 0.00 dB  
SFO1 75.4752953 MHz

===== CHANNEL f2 =====  
CPDPRG2 waltz16  
NUC2 1H  
PCPD2 80.00 usec  
PL2 0.00 dB  
PL12 15.68 dB  
PL13 16.00 dB  
SFO2 300.1312005 MHz

F2 - Processing parameters  
SI 32768  
SF 75.4677490 MHz  
WDW EM  
SSB 0  
LB 1.00 Hz  
GB 0  
PC 1.40

|                      |            |                    |                      |                        |                 |                               |                     |
|----------------------|------------|--------------------|----------------------|------------------------|-----------------|-------------------------------|---------------------|
| <b>Sample Name</b>   | MM-78CN    | <b>Position</b>    |                      | <b>Instrument Name</b> | Q-TOF           | <b>User Name</b>              | QTOF-PU\admin       |
| <b>Inj Vol</b>       | -1         | <b>InjPosition</b> |                      | <b>SampleType</b>      | Sample          | <b>IRM Calibration Status</b> | Success             |
| <b>Data Filename</b> | MM-78CNn.d | <b>ACQ Method</b>  | Pondicherry Universi | <b>Comment</b>         | MSK-MB-489.1358 | <b>Acquired Time</b>          | 05-06-2015 12:37:16 |

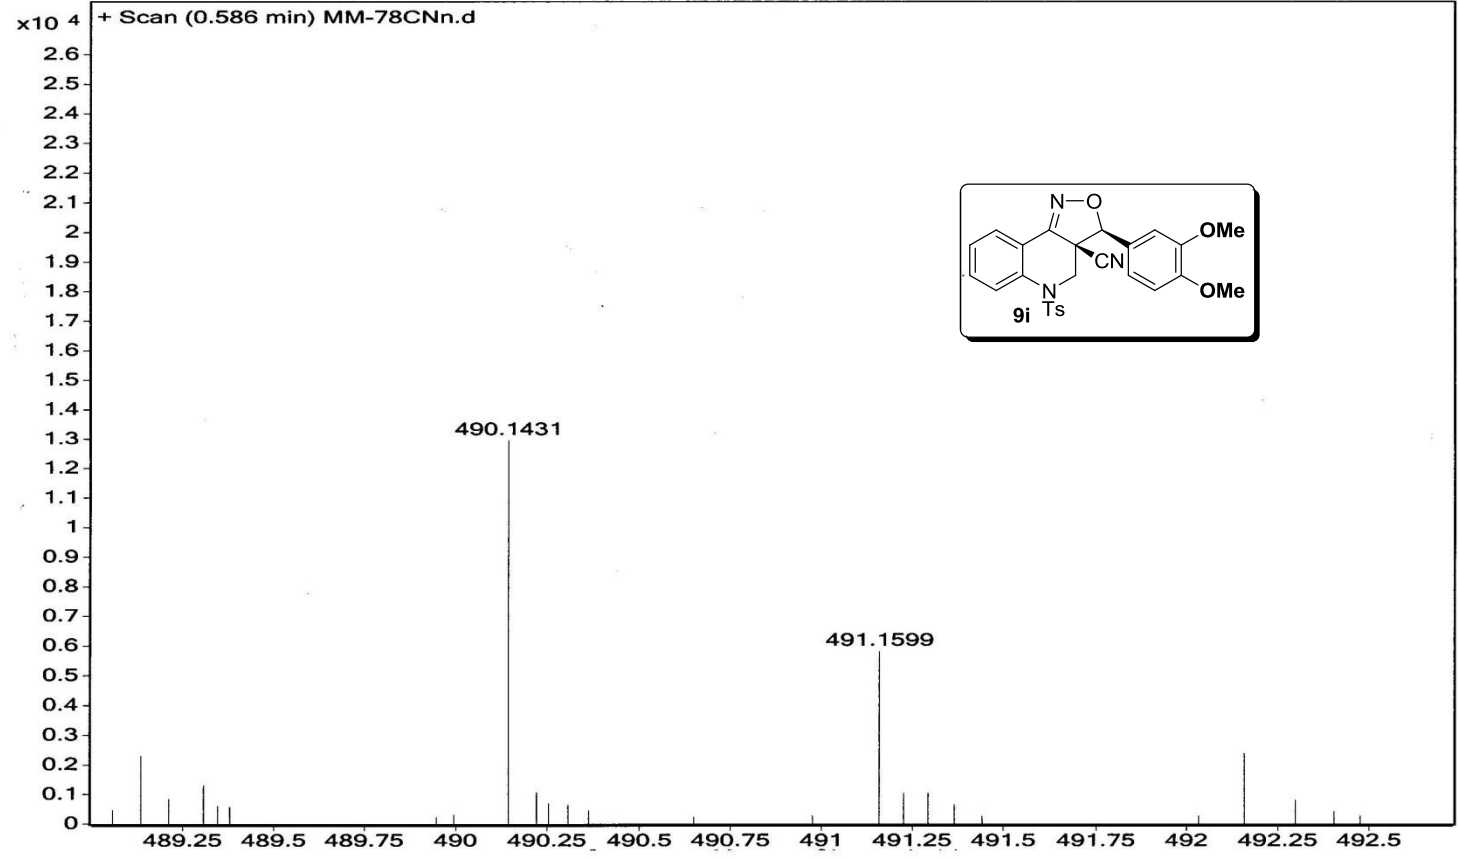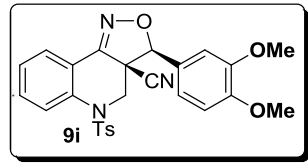

Supplement: c5ob01060h1.pdf [file c5ob01060h1.pdf]
